# Supplementary material
Source: PubMed Central journal article supplement (PMC11629803)
Supplement: PBI-16-1265-s001.pdf [file PBI-16-1265-s001.pdf]

**Supplementary File 3: Gene PAV of the flowering time regulators *FLC*, *PHYA* and *GA3ox1* in the ERANET-ASSYST *B. napus* diversity set. Swede lines are shown in red.**

| Gene name               | Gene ID from public Darmor- <i>bzh</i> reference (v4.0) | Gene ID from Darmor- <i>bzh</i> assembly (v8.1) used as basis for this pangenome study |
|-------------------------|---------------------------------------------------------|----------------------------------------------------------------------------------------|
| Bna.PHYA.chrA09         | BnaA09g48410D                                           | BnaA09g49460.1D2                                                                       |
| Bna.GA3ox.chrA09.random | BnaA09g57140D                                           | BnaA09g49330.1D2                                                                       |
| Bna.FLC.chrA10          | BnaA10g22080D                                           | BnaA10g21650.1D2                                                                       |
| Bna.CCR1.chrC08         | BnaC08g38580D                                           | BnaC08g34000.1D2                                                                       |
| Bna.GA3ox.chrC08        | BnaC08g38810D                                           | BnaC08g34160.1D2                                                                       |
| Bna.PHYA.chrC08         | BnaC08g42660D                                           | BnaC08g37880.1D2                                                                       |
| germin like protein     | BnaC08g42670D                                           | BnaC08g37890.1D2                                                                       |
| Bna.FLC.chrC09          | BnaC09g46500D                                           | BnaC09g41360.1D2                                                                       |
| Bna.FLC.chrC09          | BnaC09g46540D                                           | BnaC09g41390.1D2                                                                       |

| Assyst name | BnaA09g49460.1D2 | BnaA09g49330.1D2 | BnaA10g21650.1D2 | BnaC08g34000.1D2 | BnaC08g34160.1D2 | BnaC08g37880.1D2 |
|-------------|------------------|------------------|------------------|------------------|------------------|------------------|
| ASSYST419   | PRESENT          | PRESENT          | PRESENT          | LOST             | LOST             | LOST             |
| ASSYST424   | PRESENT          | PRESENT          | PRESENT          | LOST             | LOST             | LOST             |
| ASSYST427   | PRESENT          | PRESENT          | PRESENT          | PRESENT          | LOST             | LOST             |
| ASSYST430   | PRESENT          | PRESENT          | PRESENT          | LOST             | LOST             | LOST             |
| ASSYST431   | PRESENT          | PRESENT          | PRESENT          | LOST             | LOST             | LOST             |
| ASSYST433   | PRESENT          | PRESENT          | PRESENT          | LOST             | LOST             | LOST             |
| ASSYST436   | PRESENT          | PRESENT          | PRESENT          | LOST             | LOST             | LOST             |
| ASSYST447   | PRESENT          | PRESENT          | PRESENT          | LOST             | LOST             | LOST             |
| ASSYST453   | PRESENT          | PRESENT          | PRESENT          | LOST             | LOST             | LOST             |
| ASSYST454   | PRESENT          | PRESENT          | PRESENT          | PRESENT          | PRESENT          | PRESENT          |
| ASSYST001   | PRESENT          | PRESENT          | PRESENT          | PRESENT          | PRESENT          | PRESENT          |
| ASSYST002   | PRESENT          | PRESENT          | PRESENT          | PRESENT          | PRESENT          | PRESENT          |
| ASSYST003   | PRESENT          | PRESENT          | PRESENT          | PRESENT          | PRESENT          | PRESENT          |
| ASSYST004   | PRESENT          | PRESENT          | PRESENT          | PRESENT          | PRESENT          | PRESENT          |









Sheet1

|           |         |         |         |         |         |         |
|-----------|---------|---------|---------|---------|---------|---------|
| ASSYST203 | PRESENT | PRESENT | PRESENT | PRESENT | PRESENT | PRESENT |
| ASSYST206 | PRESENT | PRESENT | PRESENT | PRESENT | PRESENT | PRESENT |
| ASSYST228 | PRESENT | PRESENT | PRESENT | PRESENT | PRESENT | PRESENT |
| ASSYST229 | LOST    | PRESENT | PRESENT | PRESENT | PRESENT | PRESENT |
| ASSYST230 | PRESENT | PRESENT | PRESENT | PRESENT | LOST    | LOST    |
| ASSYST232 | PRESENT | PRESENT | PRESENT | PRESENT | PRESENT | PRESENT |
| ASSYST234 | PRESENT | PRESENT | PRESENT | PRESENT | PRESENT | PRESENT |
| ASSYST236 | PRESENT | PRESENT | PRESENT | PRESENT | PRESENT | PRESENT |
| ASSYST237 | PRESENT | PRESENT | PRESENT | PRESENT | PRESENT | PRESENT |
| ASSYST238 | PRESENT | PRESENT | PRESENT | PRESENT | PRESENT | PRESENT |
| ASSYST239 | PRESENT | PRESENT | PRESENT | PRESENT | PRESENT | PRESENT |
| ASSYST240 | PRESENT | PRESENT | PRESENT | PRESENT | PRESENT | PRESENT |
| ASSYST241 | PRESENT | PRESENT | PRESENT | PRESENT | PRESENT | PRESENT |
| ASSYST242 | LOST    | PRESENT | PRESENT | PRESENT | PRESENT | PRESENT |
| ASSYST244 | PRESENT | PRESENT | PRESENT | PRESENT | PRESENT | PRESENT |
| ASSYST251 | PRESENT | PRESENT | PRESENT | PRESENT | PRESENT | PRESENT |
| ASSYST252 | PRESENT | PRESENT | PRESENT | PRESENT | PRESENT | PRESENT |
| ASSYST253 | PRESENT | PRESENT | PRESENT | PRESENT | PRESENT | PRESENT |
| ASSYST254 | PRESENT | PRESENT | PRESENT | PRESENT | PRESENT | PRESENT |
| ASSYST256 | PRESENT | PRESENT | PRESENT | PRESENT | PRESENT | PRESENT |
| ASSYST257 | PRESENT | PRESENT | PRESENT | PRESENT | PRESENT | PRESENT |
| ASSYST258 | PRESENT | PRESENT | PRESENT | PRESENT | PRESENT | PRESENT |
| ASSYST259 | PRESENT | PRESENT | PRESENT | PRESENT | PRESENT | PRESENT |
| ASSYST260 | PRESENT | PRESENT | PRESENT | PRESENT | PRESENT | PRESENT |
| ASSYST261 | PRESENT | PRESENT | PRESENT | PRESENT | PRESENT | PRESENT |
| ASSYST263 | LOST    | PRESENT | PRESENT | PRESENT | PRESENT | PRESENT |
| ASSYST264 | PRESENT | PRESENT | PRESENT | PRESENT | PRESENT | PRESENT |
| ASSYST265 | PRESENT | PRESENT | PRESENT | PRESENT | PRESENT | PRESENT |
| ASSYST267 | LOST    | PRESENT | PRESENT | PRESENT | PRESENT | PRESENT |
| ASSYST268 | PRESENT | PRESENT | PRESENT | PRESENT | PRESENT | PRESENT |
| ASSYST270 | PRESENT | PRESENT | PRESENT | PRESENT | PRESENT | PRESENT |
| ASSYST271 | PRESENT | PRESENT | PRESENT | PRESENT | PRESENT | PRESENT |
| ASSYST272 | PRESENT | PRESENT | PRESENT | PRESENT | PRESENT | PRESENT |
| ASSYST273 | PRESENT | PRESENT | PRESENT | PRESENT | PRESENT | PRESENT |
| ASSYST274 | LOST    | PRESENT | PRESENT | PRESENT | PRESENT | PRESENT |

Sheet1

|           |         |         |         |         |         |         |
|-----------|---------|---------|---------|---------|---------|---------|
| ASSYST275 | PRESENT | PRESENT | PRESENT | PRESENT | PRESENT | PRESENT |
| ASSYST276 | PRESENT | PRESENT | PRESENT | PRESENT | PRESENT | PRESENT |
| ASSYST277 | PRESENT | PRESENT | PRESENT | PRESENT | PRESENT | PRESENT |
| ASSYST278 | PRESENT | PRESENT | PRESENT | PRESENT | PRESENT | PRESENT |
| ASSYST280 | PRESENT | PRESENT | PRESENT | PRESENT | PRESENT | PRESENT |
| ASSYST281 | LOST    | PRESENT | PRESENT | PRESENT | PRESENT | PRESENT |
| ASSYST282 | PRESENT | PRESENT | PRESENT | PRESENT | PRESENT | PRESENT |
| ASSYST283 | PRESENT | PRESENT | PRESENT | PRESENT | PRESENT | PRESENT |
| ASSYST284 | PRESENT | PRESENT | PRESENT | PRESENT | PRESENT | PRESENT |
| ASSYST285 | PRESENT | PRESENT | PRESENT | PRESENT | PRESENT | PRESENT |
| ASSYST286 | PRESENT | PRESENT | PRESENT | PRESENT | PRESENT | PRESENT |
| ASSYST287 | PRESENT | PRESENT | PRESENT | PRESENT | PRESENT | PRESENT |
| ASSYST289 | PRESENT | PRESENT | PRESENT | PRESENT | PRESENT | PRESENT |
| ASSYST290 | PRESENT | PRESENT | PRESENT | PRESENT | PRESENT | PRESENT |
| ASSYST299 | PRESENT | PRESENT | PRESENT | PRESENT | PRESENT | PRESENT |
| ASSYST300 | PRESENT | PRESENT | PRESENT | PRESENT | PRESENT | PRESENT |
| ASSYST302 | PRESENT | PRESENT | PRESENT | PRESENT | PRESENT | PRESENT |
| ASSYST305 | PRESENT | PRESENT | PRESENT | PRESENT | PRESENT | PRESENT |
| ASSYST306 | PRESENT | PRESENT | PRESENT | PRESENT | PRESENT | PRESENT |
| ASSYST307 | PRESENT | PRESENT | PRESENT | PRESENT | PRESENT | PRESENT |
| ASSYST309 | PRESENT | PRESENT | PRESENT | PRESENT | PRESENT | PRESENT |
| ASSYST311 | PRESENT | PRESENT | PRESENT | PRESENT | PRESENT | PRESENT |
| ASSYST312 | PRESENT | PRESENT | LOST    | PRESENT | PRESENT | PRESENT |
| ASSYST313 | PRESENT | PRESENT | PRESENT | PRESENT | PRESENT | PRESENT |
| ASSYST314 | PRESENT | PRESENT | PRESENT | PRESENT | PRESENT | PRESENT |
| ASSYST315 | PRESENT | PRESENT | PRESENT | PRESENT | PRESENT | PRESENT |
| ASSYST316 | LOST    | PRESENT | PRESENT | PRESENT | PRESENT | PRESENT |
| ASSYST317 | PRESENT | PRESENT | PRESENT | PRESENT | PRESENT | PRESENT |
| ASSYST318 | LOST    | PRESENT | PRESENT | PRESENT | PRESENT | PRESENT |
| ASSYST320 | PRESENT | PRESENT | PRESENT | PRESENT | PRESENT | PRESENT |
| ASSYST321 | PRESENT | PRESENT | PRESENT | PRESENT | PRESENT | LOST    |
| ASSYST322 | PRESENT | PRESENT | PRESENT | PRESENT | PRESENT | PRESENT |
| ASSYST323 | PRESENT | PRESENT | PRESENT | PRESENT | PRESENT | PRESENT |
| ASSYST325 | LOST    | PRESENT | PRESENT | PRESENT | PRESENT | PRESENT |
| ASSYST327 | PRESENT | PRESENT | PRESENT | PRESENT | PRESENT | PRESENT |

Sheet1

|           |         |         |         |         |         |         |
|-----------|---------|---------|---------|---------|---------|---------|
| ASSYST328 | PRESENT | PRESENT | PRESENT | PRESENT | PRESENT | PRESENT |
| ASSYST329 | PRESENT | PRESENT | LOST    | PRESENT | PRESENT | PRESENT |
| ASSYST330 | PRESENT | PRESENT | PRESENT | PRESENT | PRESENT | PRESENT |
| ASSYST333 | PRESENT | PRESENT | PRESENT | PRESENT | PRESENT | PRESENT |
| ASSYST334 | PRESENT | PRESENT | PRESENT | PRESENT | PRESENT | PRESENT |
| ASSYST335 | PRESENT | PRESENT | PRESENT | PRESENT | PRESENT | PRESENT |
| ASSYST339 | PRESENT | PRESENT | PRESENT | PRESENT | PRESENT | PRESENT |
| ASSYST340 | PRESENT | PRESENT | PRESENT | PRESENT | PRESENT | PRESENT |
| ASSYST341 | PRESENT | PRESENT | PRESENT | PRESENT | PRESENT | PRESENT |
| ASSYST342 | PRESENT | PRESENT | PRESENT | PRESENT | PRESENT | PRESENT |
| ASSYST344 | PRESENT | PRESENT | PRESENT | PRESENT | PRESENT | PRESENT |
| ASSYST345 | PRESENT | PRESENT | PRESENT | PRESENT | PRESENT | PRESENT |
| ASSYST346 | PRESENT | PRESENT | PRESENT | PRESENT | PRESENT | PRESENT |
| ASSYST347 | PRESENT | PRESENT | PRESENT | PRESENT | PRESENT | PRESENT |
| ASSYST348 | LOST    | PRESENT | PRESENT | PRESENT | PRESENT | PRESENT |
| ASSYST349 | PRESENT | PRESENT | PRESENT | PRESENT | PRESENT | PRESENT |
| ASSYST350 | PRESENT | PRESENT | PRESENT | PRESENT | PRESENT | PRESENT |
| ASSYST352 | PRESENT | PRESENT | PRESENT | PRESENT | PRESENT | PRESENT |
| ASSYST354 | PRESENT | PRESENT | PRESENT | PRESENT | PRESENT | PRESENT |
| ASSYST355 | PRESENT | PRESENT | PRESENT | PRESENT | PRESENT | PRESENT |
| ASSYST357 | PRESENT | PRESENT | PRESENT | PRESENT | PRESENT | PRESENT |
| ASSYST359 | PRESENT | PRESENT | PRESENT | PRESENT | PRESENT | PRESENT |
| ASSYST360 | PRESENT | PRESENT | PRESENT | PRESENT | PRESENT | PRESENT |
| ASSYST361 | PRESENT | PRESENT | PRESENT | PRESENT | PRESENT | PRESENT |
| ASSYST362 | PRESENT | PRESENT | PRESENT | PRESENT | PRESENT | PRESENT |
| ASSYST363 | PRESENT | PRESENT | PRESENT | LOST    | LOST    | LOST    |
| ASSYST364 | PRESENT | PRESENT | PRESENT | PRESENT | PRESENT | PRESENT |
| ASSYST365 | PRESENT | PRESENT | PRESENT | LOST    | LOST    | LOST    |
| ASSYST366 | PRESENT | PRESENT | PRESENT | PRESENT | PRESENT | PRESENT |
| ASSYST367 | PRESENT | PRESENT | PRESENT | PRESENT | PRESENT | PRESENT |
| ASSYST368 | PRESENT | PRESENT | PRESENT | PRESENT | PRESENT | PRESENT |
| ASSYST369 | PRESENT | PRESENT | PRESENT | PRESENT | PRESENT | PRESENT |
| ASSYST371 | LOST    | PRESENT | PRESENT | PRESENT | PRESENT | PRESENT |
| ASSYST372 | PRESENT | PRESENT | PRESENT | PRESENT | PRESENT | PRESENT |
| ASSYST373 | PRESENT | PRESENT | PRESENT | PRESENT | PRESENT | PRESENT |



Sheet1

|                    |                         |                         |                         |         |         |         |
|--------------------|-------------------------|-------------------------|-------------------------|---------|---------|---------|
| ASSYST374          | PRESENT                 | PRESENT                 | PRESENT                 | PRESENT | PRESENT | PRESENT |
| ASSYST377          | PRESENT                 | PRESENT                 | PRESENT                 | PRESENT | PRESENT | PRESENT |
| ASSYST378          | PRESENT                 | PRESENT                 | PRESENT                 | PRESENT | PRESENT | PRESENT |
| ASSYST379          | PRESENT                 | PRESENT                 | PRESENT                 | PRESENT | PRESENT | PRESENT |
| ASSYST380          | PRESENT                 | PRESENT                 | PRESENT                 | PRESENT | PRESENT | PRESENT |
| ASSYST381          | PRESENT                 | PRESENT                 | PRESENT                 | PRESENT | PRESENT | PRESENT |
| ASSYST382          | PRESENT                 | PRESENT                 | PRESENT                 | PRESENT | PRESENT | PRESENT |
| ASSYST383          | LOST                    | PRESENT                 | PRESENT                 | PRESENT | PRESENT | PRESENT |
| ASSYST384          | LOST                    | PRESENT                 | PRESENT                 | PRESENT | PRESENT | PRESENT |
| ASSYST385          | PRESENT                 | PRESENT                 | PRESENT                 | PRESENT | PRESENT | PRESENT |
| ASSYST386          | PRESENT                 | PRESENT                 | PRESENT                 | PRESENT | PRESENT | PRESENT |
| ASSYST389          | PRESENT                 | PRESENT                 | PRESENT                 | PRESENT | PRESENT | PRESENT |
| ASSYST390          | PRESENT                 | PRESENT                 | PRESENT                 | PRESENT | PRESENT | PRESENT |
| ASSYST391          | PRESENT                 | PRESENT                 | PRESENT                 | PRESENT | PRESENT | PRESENT |
| ASSYST392          | PRESENT                 | PRESENT                 | PRESENT                 | PRESENT | PRESENT | PRESENT |
| ASSYST393          | PRESENT                 | PRESENT                 | PRESENT                 | PRESENT | PRESENT | PRESENT |
| ASSYST394          | LOST                    | PRESENT                 | PRESENT                 | PRESENT | PRESENT | PRESENT |
| ASSYST397          | PRESENT                 | PRESENT                 | PRESENT                 | PRESENT | PRESENT | PRESENT |
| ASSYST398          | PRESENT                 | PRESENT                 | PRESENT                 | PRESENT | PRESENT | PRESENT |
| ASSYST399          | PRESENT                 | PRESENT                 | PRESENT                 | PRESENT | PRESENT | PRESENT |
| ASSYST446          | PRESENT                 | PRESENT                 | PRESENT                 | LOST    | LOST    | LOST    |
| <b>Assyst name</b> | <b>BnaC09g41390.1D2</b> | <b>BnaC09g41360.1D2</b> | <b>BnaC08g37890.1D2</b> |         |         |         |
| ASSYST419          | LOST                    | LOST                    | LOST                    |         |         |         |
| ASSYST424          | LOST                    | LOST                    | LOST                    |         |         |         |
| ASSYST427          | LOST                    | LOST                    | LOST                    |         |         |         |
| ASSYST430          | LOST                    | LOST                    | LOST                    |         |         |         |
| ASSYST431          | LOST                    | LOST                    | LOST                    |         |         |         |
| ASSYST433          | LOST                    | LOST                    | LOST                    |         |         |         |
| ASSYST436          | LOST                    | LOST                    | LOST                    |         |         |         |
| ASSYST447          | LOST                    | LOST                    | LOST                    |         |         |         |
| ASSYST453          | LOST                    | LOST                    | LOST                    |         |         |         |
| ASSYST454          | PRESENT                 | PRESENT                 | PRESENT                 |         |         |         |
| ASSYST001          | PRESENT                 | PRESENT                 | PRESENT                 |         |         |         |
| ASSYST002          | PRESENT                 | PRESENT                 | PRESENT                 |         |         |         |
| ASSYST003          | PRESENT                 | PRESENT                 | PRESENT                 |         |         |         |

|           |         |         |         |
|-----------|---------|---------|---------|
| ASSYST004 | PRESENT | PRESENT | PRESENT |
| ASSYST005 | PRESENT | PRESENT | PRESENT |
| ASSYST006 | PRESENT | PRESENT | PRESENT |
| ASSYST007 | PRESENT | PRESENT | PRESENT |
| ASSYST008 | PRESENT | PRESENT | PRESENT |
| ASSYST009 | PRESENT | PRESENT | PRESENT |
| ASSYST011 | PRESENT | PRESENT | PRESENT |
| ASSYST012 | PRESENT | PRESENT | PRESENT |
| ASSYST013 | PRESENT | PRESENT | PRESENT |
| ASSYST015 | PRESENT | PRESENT | PRESENT |
| ASSYST016 | PRESENT | PRESENT | PRESENT |
| ASSYST017 | PRESENT | PRESENT | PRESENT |
| ASSYST018 | PRESENT | PRESENT | PRESENT |
| ASSYST020 | PRESENT | PRESENT | PRESENT |
| ASSYST021 | PRESENT | PRESENT | PRESENT |
| ASSYST022 | PRESENT | PRESENT | PRESENT |
| ASSYST023 | PRESENT | PRESENT | PRESENT |
| ASSYST024 | PRESENT | PRESENT | PRESENT |
| ASSYST025 | PRESENT | PRESENT | PRESENT |
| ASSYST026 | PRESENT | PRESENT | LOST    |
| ASSYST027 | PRESENT | PRESENT | PRESENT |
| ASSYST029 | PRESENT | PRESENT | PRESENT |
| ASSYST030 | PRESENT | PRESENT | PRESENT |
| ASSYST031 | PRESENT | PRESENT | PRESENT |
| ASSYST032 | PRESENT | PRESENT | PRESENT |
| ASSYST033 | PRESENT | PRESENT | PRESENT |
| ASSYST034 | PRESENT | PRESENT | PRESENT |
| ASSYST036 | PRESENT | PRESENT | PRESENT |
| ASSYST037 | PRESENT | PRESENT | PRESENT |
| ASSYST038 | PRESENT | PRESENT | PRESENT |
| ASSYST039 | PRESENT | PRESENT | PRESENT |
| ASSYST040 | PRESENT | PRESENT | PRESENT |
| ASSYST041 | PRESENT | PRESENT | PRESENT |
| ASSYST044 | PRESENT | PRESENT | PRESENT |
| ASSYST045 | PRESENT | PRESENT | PRESENT |

|           |         |         |         |
|-----------|---------|---------|---------|
| ASSYST046 | PRESENT | PRESENT | PRESENT |
| ASSYST047 | PRESENT | PRESENT | PRESENT |
| ASSYST048 | PRESENT | PRESENT | PRESENT |
| ASSYST049 | PRESENT | PRESENT | PRESENT |
| ASSYST050 | PRESENT | PRESENT | PRESENT |
| ASSYST052 | PRESENT | PRESENT | PRESENT |
| ASSYST053 | PRESENT | PRESENT | PRESENT |
| ASSYST054 | PRESENT | PRESENT | PRESENT |
| ASSYST055 | PRESENT | PRESENT | PRESENT |
| ASSYST057 | PRESENT | PRESENT | PRESENT |
| ASSYST058 | PRESENT | PRESENT | PRESENT |
| ASSYST059 | PRESENT | PRESENT | PRESENT |
| ASSYST060 | PRESENT | PRESENT | PRESENT |
| ASSYST061 | PRESENT | PRESENT | PRESENT |
| ASSYST062 | PRESENT | PRESENT | PRESENT |
| ASSYST063 | PRESENT | PRESENT | PRESENT |
| ASSYST064 | PRESENT | PRESENT | PRESENT |
| ASSYST065 | PRESENT | PRESENT | PRESENT |
| ASSYST066 | PRESENT | PRESENT | PRESENT |
| ASSYST067 | PRESENT | PRESENT | PRESENT |
| ASSYST068 | PRESENT | PRESENT | PRESENT |
| ASSYST069 | PRESENT | PRESENT | PRESENT |
| ASSYST070 | LOST    | PRESENT | PRESENT |
| ASSYST071 | PRESENT | PRESENT | PRESENT |
| ASSYST072 | PRESENT | PRESENT | PRESENT |
| ASSYST073 | PRESENT | PRESENT | PRESENT |
| ASSYST074 | PRESENT | PRESENT | PRESENT |
| ASSYST075 | PRESENT | PRESENT | PRESENT |
| ASSYST076 | PRESENT | PRESENT | PRESENT |
| ASSYST077 | PRESENT | PRESENT | PRESENT |
| ASSYST078 | PRESENT | PRESENT | PRESENT |
| ASSYST079 | PRESENT | PRESENT | PRESENT |
| ASSYST080 | PRESENT | PRESENT | PRESENT |
| ASSYST081 | PRESENT | PRESENT | PRESENT |
| ASSYST082 | PRESENT | PRESENT | PRESENT |

|           |         |         |         |
|-----------|---------|---------|---------|
| ASSYST083 | PRESENT | PRESENT | PRESENT |
| ASSYST084 | PRESENT | PRESENT | PRESENT |
| ASSYST085 | PRESENT | PRESENT | PRESENT |
| ASSYST086 | PRESENT | PRESENT | PRESENT |
| ASSYST087 | PRESENT | PRESENT | PRESENT |
| ASSYST088 | PRESENT | PRESENT | PRESENT |
| ASSYST112 | PRESENT | PRESENT | PRESENT |
| ASSYST113 | PRESENT | PRESENT | PRESENT |
| ASSYST114 | PRESENT | PRESENT | PRESENT |
| ASSYST115 | PRESENT | PRESENT | PRESENT |
| ASSYST116 | PRESENT | PRESENT | PRESENT |
| ASSYST117 | PRESENT | PRESENT | PRESENT |
| ASSYST118 | PRESENT | PRESENT | PRESENT |
| ASSYST119 | PRESENT | PRESENT | PRESENT |
| ASSYST120 | PRESENT | PRESENT | PRESENT |
| ASSYST121 | PRESENT | PRESENT | PRESENT |
| ASSYST122 | PRESENT | PRESENT | PRESENT |
| ASSYST123 | PRESENT | PRESENT | PRESENT |
| ASSYST124 | PRESENT | PRESENT | PRESENT |
| ASSYST125 | PRESENT | PRESENT | PRESENT |
| ASSYST126 | PRESENT | PRESENT | PRESENT |
| ASSYST127 | PRESENT | PRESENT | PRESENT |
| ASSYST128 | PRESENT | PRESENT | PRESENT |
| ASSYST129 | PRESENT | PRESENT | PRESENT |
| ASSYST130 | PRESENT | PRESENT | PRESENT |
| ASSYST131 | PRESENT | PRESENT | PRESENT |
| ASSYST132 | PRESENT | PRESENT | PRESENT |
| ASSYST133 | PRESENT | PRESENT | PRESENT |
| ASSYST134 | PRESENT | PRESENT | PRESENT |
| ASSYST135 | PRESENT | PRESENT | PRESENT |
| ASSYST136 | PRESENT | PRESENT | PRESENT |
| ASSYST137 | PRESENT | PRESENT | PRESENT |
| ASSYST138 | LOST    | LOST    | LOST    |
| ASSYST139 | PRESENT | PRESENT | PRESENT |
| ASSYST140 | PRESENT | PRESENT | PRESENT |

|           |         |         |         |
|-----------|---------|---------|---------|
| ASSYST141 | PRESENT | PRESENT | PRESENT |
| ASSYST142 | PRESENT | PRESENT | PRESENT |
| ASSYST143 | PRESENT | PRESENT | PRESENT |
| ASSYST144 | PRESENT | PRESENT | PRESENT |
| ASSYST145 | PRESENT | PRESENT | PRESENT |
| ASSYST146 | PRESENT | PRESENT | PRESENT |
| ASSYST147 | PRESENT | PRESENT | PRESENT |
| ASSYST149 | PRESENT | PRESENT | PRESENT |
| ASSYST150 | PRESENT | PRESENT | PRESENT |
| ASSYST151 | PRESENT | PRESENT | PRESENT |
| ASSYST153 | PRESENT | PRESENT | PRESENT |
| ASSYST154 | PRESENT | PRESENT | PRESENT |
| ASSYST155 | PRESENT | PRESENT | PRESENT |
| ASSYST156 | PRESENT | PRESENT | PRESENT |
| ASSYST157 | PRESENT | PRESENT | PRESENT |
| ASSYST158 | PRESENT | PRESENT | PRESENT |
| ASSYST159 | PRESENT | PRESENT | PRESENT |
| ASSYST160 | PRESENT | PRESENT | PRESENT |
| ASSYST162 | PRESENT | PRESENT | PRESENT |
| ASSYST164 | PRESENT | PRESENT | PRESENT |
| ASSYST165 | PRESENT | PRESENT | PRESENT |
| ASSYST166 | PRESENT | PRESENT | PRESENT |
| ASSYST167 | PRESENT | PRESENT | PRESENT |
| ASSYST170 | PRESENT | PRESENT | PRESENT |
| ASSYST171 | PRESENT | PRESENT | PRESENT |
| ASSYST172 | PRESENT | PRESENT | PRESENT |
| ASSYST174 | PRESENT | PRESENT | PRESENT |
| ASSYST175 | PRESENT | PRESENT | PRESENT |
| ASSYST176 | PRESENT | PRESENT | PRESENT |
| ASSYST178 | PRESENT | PRESENT | PRESENT |
| ASSYST179 | PRESENT | PRESENT | PRESENT |
| ASSYST180 | PRESENT | PRESENT | PRESENT |
| ASSYST181 | PRESENT | PRESENT | PRESENT |
| ASSYST183 | PRESENT | PRESENT | PRESENT |
| ASSYST190 | PRESENT | PRESENT | PRESENT |

|           |         |         |         |
|-----------|---------|---------|---------|
| ASSYST200 | PRESENT | PRESENT | PRESENT |
| ASSYST203 | PRESENT | PRESENT | PRESENT |
| ASSYST206 | PRESENT | PRESENT | PRESENT |
| ASSYST228 | PRESENT | PRESENT | PRESENT |
| ASSYST229 | PRESENT | PRESENT | PRESENT |
| ASSYST230 | PRESENT | PRESENT | LOST    |
| ASSYST232 | PRESENT | PRESENT | PRESENT |
| ASSYST234 | PRESENT | PRESENT | PRESENT |
| ASSYST236 | PRESENT | PRESENT | PRESENT |
| ASSYST237 | PRESENT | PRESENT | PRESENT |
| ASSYST238 | PRESENT | PRESENT | PRESENT |
| ASSYST239 | PRESENT | PRESENT | PRESENT |
| ASSYST240 | PRESENT | PRESENT | PRESENT |
| ASSYST241 | PRESENT | PRESENT | PRESENT |
| ASSYST242 | PRESENT | PRESENT | PRESENT |
| ASSYST244 | PRESENT | PRESENT | PRESENT |
| ASSYST251 | PRESENT | PRESENT | PRESENT |
| ASSYST252 | PRESENT | PRESENT | PRESENT |
| ASSYST253 | PRESENT | PRESENT | PRESENT |
| ASSYST254 | PRESENT | PRESENT | PRESENT |
| ASSYST256 | PRESENT | PRESENT | PRESENT |
| ASSYST257 | PRESENT | PRESENT | PRESENT |
| ASSYST258 | PRESENT | PRESENT | PRESENT |
| ASSYST259 | PRESENT | PRESENT | PRESENT |
| ASSYST260 | PRESENT | PRESENT | PRESENT |
| ASSYST261 | PRESENT | PRESENT | PRESENT |
| ASSYST263 | PRESENT | PRESENT | PRESENT |
| ASSYST264 | PRESENT | PRESENT | PRESENT |
| ASSYST265 | PRESENT | PRESENT | PRESENT |
| ASSYST267 | PRESENT | PRESENT | PRESENT |
| ASSYST268 | PRESENT | PRESENT | PRESENT |
| ASSYST270 | PRESENT | PRESENT | PRESENT |
| ASSYST271 | PRESENT | PRESENT | PRESENT |
| ASSYST272 | PRESENT | PRESENT | PRESENT |
| ASSYST273 | PRESENT | PRESENT | PRESENT |

|           |         |         |         |
|-----------|---------|---------|---------|
| ASSYST274 | PRESENT | PRESENT | PRESENT |
| ASSYST275 | PRESENT | PRESENT | PRESENT |
| ASSYST276 | PRESENT | PRESENT | PRESENT |
| ASSYST277 | PRESENT | PRESENT | PRESENT |
| ASSYST278 | PRESENT | PRESENT | PRESENT |
| ASSYST280 | PRESENT | PRESENT | PRESENT |
| ASSYST281 | PRESENT | PRESENT | PRESENT |
| ASSYST282 | PRESENT | PRESENT | PRESENT |
| ASSYST283 | PRESENT | PRESENT | PRESENT |
| ASSYST284 | PRESENT | PRESENT | PRESENT |
| ASSYST285 | PRESENT | PRESENT | PRESENT |
| ASSYST286 | PRESENT | PRESENT | PRESENT |
| ASSYST287 | PRESENT | PRESENT | PRESENT |
| ASSYST289 | PRESENT | PRESENT | PRESENT |
| ASSYST290 | PRESENT | PRESENT | PRESENT |
| ASSYST299 | PRESENT | PRESENT | PRESENT |
| ASSYST300 | PRESENT | PRESENT | PRESENT |
| ASSYST302 | PRESENT | PRESENT | PRESENT |
| ASSYST305 | PRESENT | PRESENT | PRESENT |
| ASSYST306 | PRESENT | PRESENT | PRESENT |
| ASSYST307 | PRESENT | PRESENT | PRESENT |
| ASSYST309 | PRESENT | PRESENT | PRESENT |
| ASSYST311 | PRESENT | PRESENT | PRESENT |
| ASSYST312 | PRESENT | PRESENT | PRESENT |
| ASSYST313 | PRESENT | PRESENT | PRESENT |
| ASSYST314 | PRESENT | PRESENT | PRESENT |
| ASSYST315 | PRESENT | PRESENT | PRESENT |
| ASSYST316 | LOST    | PRESENT | PRESENT |
| ASSYST317 | PRESENT | PRESENT | PRESENT |
| ASSYST318 | PRESENT | PRESENT | PRESENT |
| ASSYST320 | PRESENT | PRESENT | PRESENT |
| ASSYST321 | PRESENT | PRESENT | LOST    |
| ASSYST322 | PRESENT | PRESENT | PRESENT |
| ASSYST323 | PRESENT | PRESENT | PRESENT |
| ASSYST325 | PRESENT | PRESENT | PRESENT |

|           |         |         |         |
|-----------|---------|---------|---------|
| ASSYST327 | PRESENT | PRESENT | PRESENT |
| ASSYST328 | PRESENT | PRESENT | PRESENT |
| ASSYST329 | PRESENT | PRESENT | PRESENT |
| ASSYST330 | PRESENT | PRESENT | PRESENT |
| ASSYST333 | PRESENT | PRESENT | PRESENT |
| ASSYST334 | PRESENT | PRESENT | PRESENT |
| ASSYST335 | PRESENT | PRESENT | PRESENT |
| ASSYST339 | PRESENT | PRESENT | PRESENT |
| ASSYST340 | PRESENT | PRESENT | PRESENT |
| ASSYST341 | PRESENT | PRESENT | PRESENT |
| ASSYST342 | PRESENT | PRESENT | PRESENT |
| ASSYST344 | PRESENT | PRESENT | PRESENT |
| ASSYST345 | PRESENT | PRESENT | PRESENT |
| ASSYST346 | PRESENT | PRESENT | PRESENT |
| ASSYST347 | PRESENT | PRESENT | PRESENT |
| ASSYST348 | PRESENT | PRESENT | PRESENT |
| ASSYST349 | PRESENT | PRESENT | PRESENT |
| ASSYST350 | PRESENT | PRESENT | PRESENT |
| ASSYST352 | PRESENT | PRESENT | PRESENT |
| ASSYST354 | PRESENT | PRESENT | PRESENT |
| ASSYST355 | PRESENT | PRESENT | PRESENT |
| ASSYST357 | PRESENT | PRESENT | PRESENT |
| ASSYST359 | PRESENT | PRESENT | PRESENT |
| ASSYST360 | PRESENT | PRESENT | PRESENT |
| ASSYST361 | PRESENT | PRESENT | PRESENT |
| ASSYST362 | PRESENT | PRESENT | PRESENT |
| ASSYST363 | PRESENT | PRESENT | LOST    |
| ASSYST364 | PRESENT | PRESENT | PRESENT |
| ASSYST365 | PRESENT | PRESENT | LOST    |
| ASSYST366 | PRESENT | PRESENT | PRESENT |
| ASSYST367 | PRESENT | PRESENT | PRESENT |
| ASSYST368 | PRESENT | PRESENT | PRESENT |
| ASSYST369 | PRESENT | PRESENT | PRESENT |
| ASSYST371 | PRESENT | PRESENT | PRESENT |
| ASSYST372 | LOST    | LOST    | PRESENT |



|           |         |         |         |
|-----------|---------|---------|---------|
| ASSYST373 | PRESENT | PRESENT | PRESENT |
| ASSYST374 | PRESENT | PRESENT | PRESENT |
| ASSYST377 | PRESENT | PRESENT | PRESENT |
| ASSYST378 | PRESENT | PRESENT | PRESENT |
| ASSYST379 | PRESENT | PRESENT | PRESENT |
| ASSYST380 | PRESENT | PRESENT | PRESENT |
| ASSYST381 | PRESENT | PRESENT | PRESENT |
| ASSYST382 | PRESENT | PRESENT | PRESENT |
| ASSYST383 | PRESENT | PRESENT | PRESENT |
| ASSYST384 | LOST    | LOST    | PRESENT |
| ASSYST385 | PRESENT | PRESENT | PRESENT |
| ASSYST386 | PRESENT | PRESENT | PRESENT |
| ASSYST389 | PRESENT | PRESENT | PRESENT |
| ASSYST390 | PRESENT | PRESENT | PRESENT |
| ASSYST391 | PRESENT | PRESENT | PRESENT |
| ASSYST392 | PRESENT | PRESENT | PRESENT |
| ASSYST393 | PRESENT | PRESENT | PRESENT |
| ASSYST394 | PRESENT | PRESENT | PRESENT |
| ASSYST397 | PRESENT | PRESENT | PRESENT |
| ASSYST398 | PRESENT | PRESENT | PRESENT |
| ASSYST399 | PRESENT | PRESENT | PRESENT |
| ASSYST446 | LOST    | LOST    | LOST    |
