# Supplementary material
Source: PubMed Central journal article supplement (PMC11629803)
Supplement: PBI-16-1265-s003.pdf [file PBI-16-1265-s003.pdf]

Supplementary Table 1. Assembly statistics of the accessions used to build the pangenome.

| <b>Accession</b>        | <b>No. of contigs</b> | <b>Total length (bp)</b> | <b>Longest contig (bp)</b> | <b>N50</b> |
|-------------------------|-----------------------|--------------------------|----------------------------|------------|
| Tapidor                 | 20,382                | 35,208,066               | 122,068                    | 5,866      |
| 51 lines pooled         | 173,375               | 158,682,692              | 41,759                     | 1,162      |
| Total newly assembled   | 193,757               | 193,890,758              |                            |            |
| Darmor- <i>bzh</i> v8.1 |                       | 850,288,203              |                            |            |
| <b>Total</b>            |                       | 1,044,178,961            |                            |            |

The accessions are listed in the order of addition to the pangenome. The reads from Tapidor (coverage ~ 80.1x) were used first. The reads from the 51 remaining accessions (excluding Darmor) were pooled prior to mapping and assembly due to low sequence coverage (<30x). Details about the reads used for assembly can be found in Supplementary Table 16.

Supplementary Table 2. Number of genes annotated and used in the analysis.

|                         | <b>Number of genes used in the analysis</b> | <b>Number of complete genes</b> |
|-------------------------|---------------------------------------------|---------------------------------|
| Darmor- <i>bzh</i> v8.1 | 80,380                                      | 80,379                          |
| Newly assembled contigs | 13,633                                      | 6,104                           |
| Pangenome               | 94,013                                      | 86,483                          |

Two Darmor-*bzh* v8.1 genes, which had no Darmor-*bzh* reads aligned to them (BnaC03g33340.1D2 and BnaC06g05080.1D2), were removed from the final gene set. This resulted in 80,380 genes stemming from the Darmor-*bzh* portion of the pangenome assembly. The annotation of newly assembled contigs ( $\geq 1000$  bp) resulted in 13,633 genes after removal of contaminants, TE genes, genes with an AED score of 1 and genes which were less than 100 bp long (in nucleotide space). The final gene set used in the analysis consisted of 94,013 genes.

Supplementary Table 3. BUSCO results to assess the completeness of the pangenome assembly.

|                      | <b>Number of BUSCOS identified in the pangenome</b> | <b>Number of BUSCOS identified in Darmor-<i>bzh</i> v8.1</b> |
|----------------------|-----------------------------------------------------|--------------------------------------------------------------|
| Complete single-copy | 202                                                 | 201                                                          |
| Complete duplicated  | 1208                                                | 1206                                                         |
| Fragmented           | 10                                                  | 9                                                            |
| Missing              | 20                                                  | 24                                                           |
| <b>Total</b>         | <b>1440</b>                                         | <b>1440</b>                                                  |

The number of BUSCOs identified in the pangenome assembly was compared with the results from the Darmor-*bzh* v8.1 assembly. 4 additional BUSCOs were identified in the newly assembled contigs. The total number of BUSCO groups searched was 1440.

Supplementary Table 4. Gene PAV with respect to the synthetic and non-synthetic accessions. The gene PAV matrix can be accessed from <http://brassicagenome.net/downloads/BnapusPan/BnaPan.PAV.table.csv.gz>. The accessions R99, Start and Skziverskij are included in the table but not used for further analysis due to low coverage (<10x). The Darmor-bzh reads used were from Bioproject PRJEB5841 (ERR457740, ERR457756 and ERR457797; total coverage ~16x). The Tapidor reads (paired-end only) were subsampled to ~16x.

Supplementary Table 5. Number of uniquely present and absent genes in (a) non-synthetics and (b) synthetics.

a

| <b>Accession name</b> | <b>No. of uniquely lost genes</b> | <b>No. of uniquely present genes</b> |
|-----------------------|-----------------------------------|--------------------------------------|
| Abukuma Natane        | 59                                | 0                                    |
| Alaska                | 7                                 | 0                                    |
| Aragon                | 12                                | 0                                    |
| Beluga                | 15                                | 0                                    |
| CanberraxCourageDH    | 13                                | 0                                    |
| Darmor- <i>bzh</i>    | 13                                | 0                                    |
| DH5                   | 2                                 | 0                                    |
| Dippes                | 17                                | 0                                    |
| E94197                | 7                                 | 0                                    |
| EVVIN                 | 59                                | 11                                   |
| Expert                | 8                                 | 1                                    |
| GLuesewitzer          | 11                                | 6                                    |
| Jupiter               | 24                                | 0                                    |
| Kromerska             | 14                                | 4                                    |
| Major                 | 30                                | 0                                    |
| MSL007C               | 5                                 | 0                                    |
| Olimpiade             | 33                                | 0                                    |
| Pacific               | 104                               | 0                                    |
| Pirola                | 23                                | 0                                    |
| Rapid                 | 11                                | 0                                    |
| Savannah              | 21                                | 1                                    |
| Tapidor               | 46                                | 4                                    |
| Vivol                 | 9                                 | 0                                    |
| Wotan                 | 10                                | 0                                    |
| English_Giant_194     | 96                                | 2                                    |
| Nunsdale              | 25                                | 2                                    |
| Palu                  | 68                                | 1                                    |
| Fortin                | 14                                | 0                                    |
| Sensation             | 333                               | 16                                   |
| Chuoshenshu           | 120                               | 3                                    |
| Gruener Schnittkohl   | 318                               | 0                                    |
| <b>Average</b>        | <b>49</b>                         | <b>2</b>                             |

**b**

| <b>Accession name</b> | <b>No. of uniquely lost genes</b> | <b>No. of uniquely present genes</b> |
|-----------------------|-----------------------------------|--------------------------------------|
| CRY_1                 | 521                               | 114                                  |
| G50                   | 579                               | 2                                    |
| H149                  | 434                               | 9                                    |
| H165                  | 772                               | 10                                   |
| H176                  | 125                               | 0                                    |
| H44                   | 491                               | 0                                    |
| HIY_1                 | 93                                | 9                                    |
| MOY_4                 | 394                               | 183                                  |
| OLL1                  | 1                                 | 5                                    |
| R_13_6                | 50                                | 11                                   |
| R53                   | 806                               | 6                                    |
| R76                   | 946                               | 49                                   |
| Resyn-Go S4           | 56                                | 0                                    |
| RS_10_7               | 905                               | 4                                    |
| RS_4_6                | 1052                              | 5                                    |
| RS_7_6                | 44                                | 1                                    |
| RS_8_6                | 89                                | 4                                    |
| S_13                  | 25                                | 0                                    |
| S_39                  | 877                               | 1                                    |
| <b>Average</b>        | <b>435</b>                        | <b>22</b>                            |

On average, each accession contained 84,192 genes. The synthetic accessions demonstrated the greatest variation, with an average of 22 uniquely present and 435 uniquely absent genes, compared to the non-synthetic accessions, which had an average of 2 uniquely present and 49 uniquely absent genes. Within the non-synthetic accessions, 1, 2, 2, and 8 uniquely present genes were identified on average, and 23, 219, 63 and 174 uniquely absent genes were identified on average in the oilseed, vegetable, fodder types, and swedes, respectively.

Supplementary Table 6. Gene ontology (GO) enrichment of uniquely present genes.

| <b>Type/Morphotype</b> | <b>GO.ID</b> | <b>Term</b>                                   | <b>p-value</b> |
|------------------------|--------------|-----------------------------------------------|----------------|
| <b>Synthetics</b>      | GO:0006468   | protein phosphorylation                       | 4.90E-05       |
|                        | GO:0006952   | defense response                              | 0.00048        |
|                        | GO:0009653   | anatomical structure morphogenesis            | 0.00057        |
|                        | GO:0035556   | intracellular signal transduction             | 0.00126        |
|                        | GO:0009626   | plant-type hypersensitive response            | 0.00221        |
| <b>Oilseeds</b>        | GO:0044237   | cellular metabolic process                    | 2.50E-06       |
|                        | GO:0008152   | metabolic process                             | 0.00013        |
|                        | GO:1901564   | organonitrogen compound metabolic proces      | 0.00055        |
|                        | GO:0019752   | carboxylic acid metabolic process             | 0.0038         |
|                        | GO:0044710   | single-organism metabolic process             | 0.00494        |
| <b>Swedes</b>          | GO:0070981   | L-asparagine biosynthetic process             | 0.00086        |
|                        | GO:0006529   | asparagine biosynthetic process               | 0.00129        |
|                        | GO:0006541   | glutamine metabolic process                   | 0.01305        |
|                        | GO:0010951   | negative regulation of endopeptidase activity | 0.01577        |
| <b>Fodder</b>          | GO:0009094   | L-phenylalanine biosynthetic process          | 0.00059        |
|                        | GO:0010048   | vernalization response                        | 0.00595        |
|                        | GO:0043481   | anthocyanin accumulation in tissues           | 0.00852        |
|                        | GO:0048440   | carpel development                            | 0.01493        |
| <b>Vegetable</b>       | NA           | NA                                            | NA             |

Top 5 most significant GO terms in the biological process category associated with uniquely present genes in each type/morphotype. No significant terms were found for the uniquely present genes in the vegetable types.

Supplementary Table 7. GO enrichment of uniquely absent genes.

| Type/Morphotype   | GO.ID      | Term                                                     | p.value  |
|-------------------|------------|----------------------------------------------------------|----------|
| <b>Synthetics</b> | GO:0006355 | regulation of transcription                              | 2.30E-06 |
|                   | GO:0009873 | ethylene-activated signaling pathway                     | 6.60E-05 |
|                   | GO:0009611 | response to wounding                                     | 0.00013  |
|                   | GO:0016567 | protein ubiquitination                                   | 0.00022  |
|                   | GO:0010200 | response to chitin                                       | 0.00025  |
| <b>Oilseeds</b>   | GO:0042180 | cellular ketone metabolic process                        | 0.0045   |
|                   | GO:0046719 | regulation by virus of viral protein levels in host cell | 0.0046   |
|                   | GO:0030334 | regulation of cell migration                             | 0.0046   |
|                   | GO:0006654 | phosphatidic acid biosynthetic process                   | 0.0046   |
|                   | GO:0050764 | regulation of phagocytosis                               | 0.0046   |
| <b>Swedes</b>     | GO:0010044 | response to aluminum ion                                 | 5.90E-07 |
|                   | GO:0006011 | UDP-glucose metabolic process                            | 0.00018  |
|                   | GO:0009910 | negative regulation of flower development                | 0.0006   |
|                   | GO:0010264 | myo-inositol hexakisphosphate biosynthetic process       | 0.00094  |
|                   | GO:0007062 | sister chromatid cohesion                                | 0.00162  |
| <b>Fodder</b>     | GO:0006436 | tryptophanyl-tRNA aminoacylation                         | 9.10E-05 |
|                   | GO:0009739 | response to gibberellin                                  | 0.00018  |
|                   | GO:0046274 | lignin catabolic process                                 | 0.0002   |
|                   | GO:0010439 | regulation of glucosinolate biosynthetic process         | 0.00113  |
|                   | GO:0009911 | positive regulation of flower development                | 0.00286  |
| <b>Vegetable</b>  | GO:0006655 | phosphatidylglycerol biosynthetic process                | 0.0016   |
|                   | GO:0032259 | methylation                                              | 0.0034   |
|                   | GO:1902047 | polyamine transmembrane transport                        | 0.0035   |
|                   | GO:0048507 | meristem development                                     | 0.0041   |
|                   | GO:0043489 | RNA stabilization                                        | 0.0063   |

Top 5 most significant GO terms in the biological process category associated with uniquely absent genes in each type/morphotype.



Supplementary Table 8. GO enrichment of variable genes for the biological process category.

| <b>GO.ID</b> | <b>Term</b>                                                     | <b>p.value</b> |
|--------------|-----------------------------------------------------------------|----------------|
| GO:0009626   | plant-type hypersensitive response                              | 3.4E-20        |
| GO:0051607   | defense response to virus                                       | 9.5E-13        |
| GO:0090304   | nucleic acid metabolic process                                  | 3.8E-10        |
| GO:0045088   | regulation of innate immune response                            | 7.4E-10        |
| GO:0002764   | immune response-regulating signaling pathway                    | 0.00000038     |
| GO:0016106   | sesquiterpenoid biosynthetic process                            | 0.00000039     |
| GO:0051762   | sesquiterpene biosynthetic process                              | 0.00000076     |
| GO:0000966   | RNA 5'-end processing                                           | 0.00000085     |
| GO:0006412   | translation                                                     | 0.0000012      |
| GO:0010204   | defense response signaling pathway, resistance gene-independent | 0.0000014      |
| GO:0006171   | cAMP biosynthetic process                                       | 0.000002       |
| GO:0009816   | defense response to bacterium, incompatible                     | 0.0000025      |
| GO:0044699   | single-organism process                                         | 0.0000031      |
| GO:0002230   | positive regulation of defense response to virus by host        | 0.000017       |
| GO:0006517   | protein deglycosylation                                         | 0.000018       |
| GO:0044260   | cellular macromolecule metabolic process                        | 0.00019        |
| GO:2000071   | regulation of defense response by callose deposition            | 0.00021        |
| GO:0046741   | transport of virus in host, tissue to tissue                    | 0.00038        |
| GO:0006085   | acetyl-CoA biosynthetic process                                 | 0.00038        |
| GO:0006265   | DNA topological change                                          | 0.0006         |
| GO:0009870   | defense response signaling pathway, resistance gene-dependent   | 0.00074        |
| GO:0051050   | positive regulation of transport                                | 0.00076        |
| GO:0015718   | monocarboxylic acid transport                                   | 0.00106        |
| GO:0031323   | regulation of cellular metabolic process                        | 0.00124        |
| GO:0009615   | response to virus                                               | 0.00148        |
| GO:0006182   | cGMP biosynthetic process                                       | 0.0022         |
| GO:0042138   | meiotic DNA double-strand break formation                       | 0.00235        |

Supplementary Table 9. Number of SNPs and SNP density across the pangenome.

| <b>Chromosome</b> | <b>Chromosome size (bp)</b> | <b>No. of SNPs</b> | <b>SNP density (per kbp)</b> |
|-------------------|-----------------------------|--------------------|------------------------------|
| chrA01            | 31,163,448                  | 175,524            | 5.63                         |
| chrA02            | 31,341,975                  | 159,976            | 5.10                         |
| chrA03            | 39,488,916                  | 217,598            | 5.51                         |
| chrA04            | 23,309,376                  | 126,400            | 5.42                         |
| chrA05            | 28,601,535                  | 165,790            | 5.80                         |
| chrA06            | 31,899,768                  | 173,569            | 5.44                         |
| chrA07            | 28,903,433                  | 165,355            | 5.72                         |
| chrA08            | 21,742,160                  | 112,067            | 5.15                         |
| chrA09            | 46,718,919                  | 232,400            | 4.97                         |
| chrA10            | 19,955,110                  | 102,619            | 5.14                         |
| chrC01            | 47,954,325                  | 247,209            | 5.16                         |
| chrC02            | 58,662,066                  | 325,324            | 5.55                         |
| chrC03            | 71,849,896                  | 315,464            | 4.39                         |
| chrC04            | 61,044,540                  | 273,593            | 4.48                         |
| chrC05            | 52,720,298                  | 245,664            | 4.66                         |
| chrC06            | 44,607,072                  | 244,755            | 5.49                         |
| chrC07            | 52,496,477                  | 305,767            | 5.82                         |
| chrC08            | 46,289,800                  | 245,513            | 5.30                         |
| chrC09            | 60,205,297                  | 163,737            | 2.72                         |
| Unplaced          | 51,333,792                  | 163,459            | 3.18                         |
| Tapidor contigs   | 35,208,066                  | 125,255            | 3.22                         |
| 51 lines contigs  | 158,682,692                 | 588,691            | 3.71                         |
| <b>Total</b>      | <b>1,044,178,961</b>        | <b>4,875,729</b>   | <b>4.67</b>                  |

Supplementary Table 10. Number of private SNPs in (a) non-synthetics and (b) synthetics.

**a**

| <b>Accession</b>    | <b>Number of private SNPs</b> |
|---------------------|-------------------------------|
| Abukuma Natane      | 2716                          |
| Alaska              | 2687                          |
| Aragon              | 6248                          |
| Beluga              | 1847                          |
| CanberraCourageDH   | 3855                          |
| Darmor- <i>bzh</i>  | 225                           |
| DH5                 | 4015                          |
| Dippes              | 3102                          |
| E94197              | 2096                          |
| EVVIN               | 29009                         |
| Expert              | 2780                          |
| Gross Luesewitzer   | 3758                          |
| Jupiter             | 8353                          |
| Kromerska           | 33658                         |
| Major               | 3813                          |
| MSL007C             | 8694                          |
| Olimpiade           | 11262                         |
| Pacific             | 2343                          |
| Pirola              | 1589                          |
| Rapid               | 2801                          |
| Savannah            | 8211                          |
| Skziverskij         | 3649                          |
| Start               | 780                           |
| Tapidor             | 22818                         |
| Vivol               | 5579                          |
| Wotan               | 4462                          |
| Chuoshenshu         | 16574                         |
| Gruener Schnittkohl | 15442                         |
| Fortin              | 1648                          |
| Sensation           | 29315                         |
| English_Giant_194   | 13676                         |
| Palu                | 12729                         |
| Nunsdale            | 7373                          |

**b**

| <b>Accession</b> | <b>Number of private SNPs</b> |
|------------------|-------------------------------|
| CRY_1            | 302252                        |
| G50              | 17936                         |
| H149             | 59877                         |
| H165             | 44493                         |
| H176             | 7296                          |
| H44              | 61461                         |
| HIY_1            | 67404                         |
| MOY_4            | 238989                        |
| OLL1             | 13491                         |
| R_13_6           | 61837                         |
| R53              | 57586                         |
| R76              | 159982                        |
| R99              | 3410                          |
| Resyn_Go_S4      | 2667                          |
| RS_10_7          | 91691                         |
| RS_4_6           | 61951                         |
| RS_7_6           | 56112                         |
| RS_8_6           | 46066                         |
| S_13             | 4593                          |
| S_39             | 24170                         |

Supplementary Table 11. Properties of CDS SNPs in core and variable genomes.

|                               | <b>core genome</b> | <b>variable genome</b> |
|-------------------------------|--------------------|------------------------|
| Number of CDS SNPs            | 264,562            | 126,595                |
| Number of synonymous SNPs     | 151,592            | 61,588                 |
| Number of non-synonymous SNPs | 111,631            | 63,582                 |
| Number of nonsense SNPs       | 1,339              | 1,425                  |
| Average exon length (bp)      | 1130.55            | 790.40                 |
| Total exon length (bp)        | 66215345           | 29273035               |
| SNP density (SNPs/Kbp)        | 3.99               | 4.51                   |

Supplementary Table 12. GO enrichment of HE PAV genes. Significant GO terms in the biological process category are shown. for (a) A01 to C01, (b) A02 to C02, (c) A04 to C04, (d) A07 to C06, (e) A09 to C08, (f) A09 to C09, (g) A10 to C09, (h) C01 to A01, (i) C02 to A02, (k) C03 to A03, (l) C04 to A04, (m) C04 to A05, (n) C05 to A05, (o) C06 to A07, (p) C08 to C09, (q) C09 to A09 and (r) C09 to A10.

**a**

| <b>GO.ID</b> | <b>Term</b>                                 | <b>p.value</b> |
|--------------|---------------------------------------------|----------------|
| GO:0015795   | sorbitol transport                          | 3.3E-05        |
| GO:0015797   | mannitol transport                          | 3.3E-05        |
| GO:0015752   | D-ribose transport                          | 3.3E-05        |
| GO:0015753   | D-xylose transport                          | 3.3E-05        |
| GO:0015793   | glycerol transport                          | 8.9E-05        |
| GO:0015757   | galactose transport                         | 8.9E-05        |
| GO:0015798   | myo-inositol transport                      | 0.00029        |
| GO:1904659   | glucose transmembrane transport             | 0.00067        |
| GO:0015992   | proton transport                            | 0.00072        |
| GO:0006979   | response to oxidative stress                | 0.00118        |
| GO:0016572   | histone phosphorylation                     | 0.00189        |
| GO:0031348   | negative regulation of defense response     | 0.00197        |
| GO:0048467   | gynoecium development                       | 0.0038         |
| GO:0042538   | hyperosmotic salinity response              | 0.00387        |
| GO:0008295   | spermidine biosynthetic process             | 0.00499        |
| GO:0090342   | regulation of cell aging                    | 0.00559        |
| GO:0009052   | pentose-phosphate shunt, non-oxidative b... | 0.00559        |
| GO:0010582   | floral meristem determinacy                 | 0.00575        |
| GO:0019432   | triglyceride biosynthetic process           | 0.00629        |
| GO:0071492   | cellular response to UV-A                   | 0.00681        |
| GO:0048235   | pollen sperm cell differentiation           | 0.00687        |
| GO:0018344   | protein geranylgeranylation                 | 0.00747        |
| GO:0009446   | putrescine biosynthetic process             | 0.00815        |
| GO:0006527   | arginine catabolic process                  | 0.00885        |
| GO:0016579   | protein deubiquitination                    | 0.0096         |
| GO:0009759   | indole glucosinolate biosynthetic proces... | 0.01034        |
| GO:0009625   | response to insect                          | 0.01079        |
| GO:1901642   | nucleoside transmembrane transport          | 0.01109        |
| GO:0009260   | ribonucleotide biosynthetic process         | 0.0119         |
| GO:0008283   | cell proliferation                          | 0.01229        |

**b**

| <b>GO.ID</b> | <b>Term</b>                                 | <b>p.value</b> |
|--------------|---------------------------------------------|----------------|
| GO:0002221   | pattern recognition receptor signaling p... | 0.0018         |
| GO:0006289   | nucleotide-excision repair                  | 0.002          |
| GO:0031407   | oxylipin metabolic process                  | 0.0021         |
| GO:0009733   | response to auxin                           | 0.0029         |
| GO:0006979   | response to oxidative stress                | 0.0044         |
| GO:0046686   | response to cadmium ion                     | 0.0049         |
| GO:0060774   | auxin mediated signaling pathway involve... | 0.0053         |
| GO:0006414   | translational elongation                    | 0.0057         |
| GO:0060772   | leaf phyllotactic patterning                | 0.0077         |
| GO:0009664   | plant-type cell wall organization           | 0.0079         |
| GO:0043481   | anthocyanin accumulation in tissues in r... | 0.0082         |
| GO:0010080   | regulation of floral meristem growth        | 0.0091         |
| GO:0015706   | nitrate transport                           | 0.0095         |
| GO:0010167   | response to nitrate                         | 0.0098         |
| GO:0000712   | resolution of meiotic recombination inte... | 0.0105         |
| GO:0010492   | maintenance of shoot apical meristem ide... | 0.0112         |
| GO:0007143   | female meiotic division                     | 0.0113         |
| GO:0009932   | cell tip growth                             | 0.0115         |
| GO:0009723   | response to ethylene                        | 0.0155         |
| GO:0006094   | gluconeogenesis                             | 0.0164         |
| GO:0080155   | regulation of double fertilization formi... | 0.0164         |
| GO:0000462   | maturation of SSU-rRNA from tricistronic... | 0.0183         |
| GO:2000904   | regulation of starch metabolic process      | 0.0192         |
| GO:0000271   | polysaccharide biosynthetic process         | 0.0194         |
| GO:0048511   | rhythmic process                            | 0.0212         |
| GO:0071249   | cellular response to nitrate                | 0.0212         |
| GO:0046688   | response to copper ion                      | 0.0223         |
| GO:0051187   | cofactor catabolic process                  | 0.0228         |
| GO:0042545   | cell wall modification                      | 0.0271         |
| GO:0015866   | ADP transport                               | 0.0277         |

c

| <b>GO.ID</b> | <b>Term</b>                                 | <b>p.value</b> |
|--------------|---------------------------------------------|----------------|
| GO:0010422   | regulation of brassinosteroid biosynthet... | 0.0001         |
| GO:0030639   | polyketide biosynthetic process             | 0.00027        |
| GO:0009298   | GDP-mannose biosynthetic process            | 0.00149        |
| GO:0080110   | sporopollenin biosynthetic process          | 0.00166        |
| GO:0006633   | fatty acid biosynthetic process             | 0.00358        |
| GO:0009888   | tissue development                          | 0.00399        |
| GO:0010218   | response to far red light                   | 0.00471        |
| GO:0006614   | SRP-dependent cotranslational protein ta... | 0.00523        |
| GO:0006778   | porphyrin-containing compound metabolic ... | 0.00602        |
| GO:0007623   | circadian rhythm                            | 0.00648        |
| GO:0019853   | L-ascorbic acid biosynthetic process        | 0.00694        |
| GO:0006671   | phytosphingosine metabolic process          | 0.00914        |
| GO:0019877   | diaminopimelate biosynthetic process        | 0.01066        |
| GO:0048034   | heme O biosynthetic process                 | 0.01066        |
| GO:0051457   | maintenance of protein location in nucle... | 0.01066        |
| GO:0002679   | respiratory burst involved in defense re... | 0.01111        |
| GO:0009887   | organ morphogenesis                         | 0.01117        |
| GO:0032264   | IMP salvage                                 | 0.01217        |
| GO:0009585   | red, far-red light phototransduction        | 0.01248        |
| GO:0019307   | mannose biosynthetic process                | 0.01369        |
| GO:0040007   | growth                                      | 0.01558        |
| GO:0048653   | anther development                          | 0.01758        |
| GO:0060359   | response to ammonium ion                    | 0.02121        |
| GO:0019762   | glucosinolate catabolic process             | 0.02127        |
| GO:0009647   | skotomorphogenesis                          | 0.02271        |
| GO:0046168   | glycerol-3-phosphate catabolic process      | 0.02569        |
| GO:0001736   | establishment of planar polarity            | 0.02569        |
| GO:0010311   | lateral root formation                      | 0.02669        |
| GO:0006661   | phosphatidylinositol biosynthetic proces... | 0.02697        |
| GO:0006626   | protein targeting to mitochondrion          | 0.03268        |



d

| <b>GO.ID</b> | <b>Term</b>                                 | <b>p.value</b> |
|--------------|---------------------------------------------|----------------|
| GO:0016540   | protein autoprocessing                      | 0.00017        |
| GO:0019563   | glycerol catabolic process                  | 0.00039        |
| GO:0009805   | coumarin biosynthetic process               | 0.00104        |
| GO:1901684   | arsenate ion transmembrane transport        | 0.00116        |
| GO:0035435   | phosphate ion transmembrane transport       | 0.00215        |
| GO:0009641   | shade avoidance                             | 0.00385        |
| GO:0098655   | cation transmembrane transport              | 0.00498        |
| GO:0043456   | regulation of pentose-phosphate shunt       | 0.00829        |
| GO:0043068   | positive regulation of programmed cell d... | 0.0083         |
| GO:0090057   | root radial pattern formation               | 0.00967        |
| GO:1901997   | negative regulation of indoleacetic acid... | 0.01104        |
| GO:0090359   | negative regulation of abscisic acid bio... | 0.01104        |
| GO:0006127   | glycerophosphate shuttle                    | 0.01104        |
| GO:0010270   | photosystem II oxygen evolving complex a... | 0.01104        |
| GO:0045117   | azole transport                             | 0.01241        |
| GO:0009744   | response to sucrose                         | 0.01363        |
| GO:0015822   | ornithine transport                         | 0.01378        |
| GO:0010248   | establishment or maintenance of transmem... | 0.01378        |
| GO:0015824   | proline transport                           | 0.01545        |
| GO:0048767   | root hair elongation                        | 0.01568        |
| GO:0046167   | glycerol-3-phosphate biosynthetic proces... | 0.01652        |
| GO:0045723   | positive regulation of fatty acid biosyn... | 0.01652        |
| GO:0071497   | cellular response to freezing               | 0.01652        |
| GO:0002237   | response to molecule of bacterial origin    | 0.01725        |
| GO:1901959   | positive regulation of cutin biosyntheti... | 0.01788        |
| GO:0043091   | L-arginine import                           | 0.01788        |
| GO:0042754   | negative regulation of circadian rhythm     | 0.01788        |
| GO:0010366   | negative regulation of ethylene biosynth... | 0.01924        |
| GO:0010236   | plastoquinone biosynthetic process          | 0.01924        |
| GO:0006541   | glutamine metabolic process                 | 0.01933        |

e

| <b>GO.ID</b> | <b>Term</b>                                 | <b>p.value</b> |
|--------------|---------------------------------------------|----------------|
| GO:0071249   | cellular response to nitrate                | 0.000004       |
| GO:0046256   | 2,4,6-trinitrotoluene catabolic process     | 0.000019       |
| GO:0009854   | oxidative photosynthetic carbon pathway     | 0.00066        |
| GO:0006571   | tyrosine biosynthetic process               | 0.00179        |
| GO:0006623   | protein targeting to vacuole                | 0.00244        |
| GO:0019430   | removal of superoxide radicals              | 0.00252        |
| GO:0048527   | lateral root development                    | 0.00317        |
| GO:0055114   | oxidation-reduction process                 | 0.00654        |
| GO:0010152   | pollen maturation                           | 0.00732        |
| GO:0036065   | fucosylation                                | 0.00794        |
| GO:0010501   | RNA secondary structure unwinding           | 0.01209        |
| GO:0043153   | entrainment of circadian clock by photop... | 0.01351        |
| GO:0009830   | cell wall modification involved in absci... | 0.01487        |
| GO:0010260   | organ senescence                            | 0.01576        |
| GO:0006474   | N-terminal protein amino acid acetylatio... | 0.01619        |
| GO:0015770   | sucrose transport                           | 0.017          |
| GO:0090057   | root radial pattern formation               | 0.01886        |
| GO:0018022   | peptidyl-lysine methylation                 | 0.01897        |
| GO:0006109   | regulation of carbohydrate metabolic pro... | 0.02346        |
| GO:1990570   | GDP-mannose transmembrane transport         | 0.02419        |
| GO:1901601   | strigolactone biosynthetic process          | 0.02419        |
| GO:0080037   | negative regulation of cytokinin-activat... | 0.02419        |
| GO:0042276   | error-prone translesion synthesis           | 0.02684        |
| GO:0080178   | 5-carbamoylmethyluridine metabolic proce... | 0.02684        |
| GO:0010248   | establishment or maintenance of transmem... | 0.02684        |
| GO:0010163   | high-affinity potassium ion import          | 0.02948        |
| GO:0031539   | positive regulation of anthocyanin metab... | 0.03212        |
| GO:2000032   | regulation of secondary shoot formation     | 0.03212        |
| GO:0016311   | dephosphorylation                           | 0.03248        |
| GO:0080187   | floral organ senescence                     | 0.03475        |

f

| <b>GO.ID</b> | <b>Term</b>                                 | <b>p.value</b> |
|--------------|---------------------------------------------|----------------|
| GO:0010541   | acropetal auxin transport                   | 0.0000019      |
| GO:0010315   | auxin efflux                                | 0.000016       |
| GO:0010540   | basipetal auxin transport                   | 0.000028       |
| GO:0043481   | anthocyanin accumulation in tissues in r... | 0.00044        |
| GO:0046740   | transport of virus in host, cell to cell    | 0.00102        |
| GO:0010160   | formation of organ boundary                 | 0.00121        |
| GO:0042964   | thioredoxin biosynthetic process            | 0.00144        |
| GO:0009932   | cell tip growth                             | 0.00173        |
| GO:0010492   | maintenance of shoot apical meristem ide... | 0.00178        |
| GO:0031146   | SCF-dependent proteasomal ubiquitin-depe... | 0.00182        |
| GO:0009958   | positive gravitropism                       | 0.00227        |
| GO:0009306   | protein secretion                           | 0.00248        |
| GO:0009740   | gibberellic acid mediated signaling path... | 0.0028         |
| GO:0010071   | root meristem specification                 | 0.00291        |
| GO:0080086   | stamen filament development                 | 0.00336        |
| GO:0048443   | stamen development                          | 0.00348        |
| GO:0098655   | cation transmembrane transport              | 0.00463        |
| GO:0043086   | negative regulation of catalytic activit... | 0.00571        |
| GO:0080167   | response to karrikin                        | 0.0059         |
| GO:0009846   | pollen germination                          | 0.00636        |
| GO:0045454   | cell redox homeostasis                      | 0.00642        |
| GO:0010048   | vernalization response                      | 0.00825        |
| GO:0009825   | multidimensional cell growth                | 0.00834        |
| GO:0006207   | 'de novo' pyrimidine nucleobase biosynth... | 0.00973        |
| GO:0010078   | maintenance of root meristem identity       | 0.01088        |
| GO:0000271   | polysaccharide biosynthetic process         | 0.01364        |
| GO:0019745   | pentacyclic triterpenoid biosynthetic pr... | 0.01388        |
| GO:1903070   | negative regulation of ER-associated ubi... | 0.01471        |
| GO:0015789   | UDP-N-acetylgalactosamine transport         | 0.01471        |
| GO:1990569   | UDP-N-acetylglucosamine transmembrane tr... | 0.01471        |

g

| <b>GO.ID</b> | <b>Term</b>                                 | <b>p.value</b> |
|--------------|---------------------------------------------|----------------|
| GO:0010089   | xylem development                           | 0.000047       |
| GO:0090435   | protein localization to nuclear envelope    | 0.000083       |
| GO:0046685   | response to arsenic-containing substance    | 0.0019         |
| GO:0016132   | brassinosteroid biosynthetic process        | 0.0045         |
| GO:0050983   | deoxyhypusine biosynthetic process from ... | 0.0056         |
| GO:0045839   | negative regulation of mitotic nuclear d... | 0.0067         |
| GO:2000603   | regulation of secondary growth              | 0.0068         |
| GO:0035235   | ionotropic glutamate receptor signaling ... | 0.0077         |
| GO:0019424   | sulfide oxidation, using siroheme sulfit... | 0.009          |
| GO:0051291   | protein heterooligomerization               | 0.009          |
| GO:0006617   | SRP-dependent cotranslational protein ta... | 0.009          |
| GO:0048283   | indeterminate inflorescence morphogenesi... | 0.009          |
| GO:0019419   | sulfate reduction                           | 0.0101         |
| GO:1901430   | positive regulation of syringal lignin b... | 0.0124         |
| GO:0071806   | protein transmembrane transport             | 0.0132         |
| GO:0032509   | endosome transport via multivesicular bo... | 0.0146         |
| GO:0051604   | protein maturation                          | 0.0149         |
| GO:0015012   | heparan sulfate proteoglycan biosynthesi... | 0.0168         |
| GO:0019395   | fatty acid oxidation                        | 0.0188         |
| GO:0009102   | biotin biosynthetic process                 | 0.019          |
| GO:0006420   | arginyl-tRNA aminoacylation                 | 0.019          |
| GO:0048657   | anther wall tapetum cell differentiation    | 0.019          |
| GO:0048868   | pollen tube development                     | 0.0198         |
| GO:0019433   | triglyceride catabolic process              | 0.0201         |
| GO:0009684   | indoleacetic acid biosynthetic process      | 0.0208         |
| GO:0045038   | protein import into chloroplast thylakoi... | 0.0224         |
| GO:1902047   | polyamine transmembrane transport           | 0.0235         |
| GO:0045324   | late endosome to vacuole transport          | 0.0246         |
| GO:0030418   | nicotianamine biosynthetic process          | 0.0246         |
| GO:0008333   | endosome to lysosome transport              | 0.0246         |

**h**

| <b>GO.ID</b> | <b>Term</b>                                 | <b>p.value</b> |
|--------------|---------------------------------------------|----------------|
| GO:0009698   | phenylpropanoid metabolic process           | 0.00017        |
| GO:0006545   | glycine biosynthetic process                | 0.00268        |
| GO:0009113   | purine nucleobase biosynthetic process      | 0.00339        |
| GO:0000302   | response to reactive oxygen species         | 0.00447        |
| GO:0009116   | nucleoside metabolic process                | 0.00499        |
| GO:0006527   | arginine catabolic process                  | 0.00533        |
| GO:0045893   | positive regulation of transcription, DN... | 0.00622        |
| GO:0007188   | adenylate cyclase-modulating G-protein c... | 0.00881        |
| GO:0055114   | oxidation-reduction process                 | 0.00921        |
| GO:0042744   | hydrogen peroxide catabolic process         | 0.01059        |
| GO:0009733   | response to auxin                           | 0.01245        |
| GO:0006301   | postreplication repair                      | 0.01261        |
| GO:0015689   | molybdate ion transport                     | 0.01303        |
| GO:0045962   | positive regulation of development, hete... | 0.01303        |
| GO:0006302   | double-strand break repair                  | 0.01321        |
| GO:0009446   | putrescine biosynthetic process             | 0.01419        |
| GO:0009611   | response to wounding                        | 0.01584        |
| GO:0042546   | cell wall biogenesis                        | 0.0162         |
| GO:0048235   | pollen sperm cell differentiation           | 0.01828        |
| GO:2000067   | regulation of root morphogenesis            | 0.01929        |
| GO:0006598   | polyamine catabolic process                 | 0.0234         |
| GO:0016192   | vesicle-mediated transport                  | 0.02397        |
| GO:0009817   | defense response to fungus, incompatible... | 0.02473        |
| GO:0030036   | actin cytoskeleton organization             | 0.0281         |
| GO:0016572   | histone phosphorylation                     | 0.02958        |
| GO:0080125   | multicellular structure septum developme... | 0.03126        |
| GO:0035670   | plant-type ovary development                | 0.03128        |
| GO:0042538   | hyperosmotic salinity response              | 0.03152        |
| GO:0098656   | anion transmembrane transport               | 0.03233        |
| GO:0006544   | glycine metabolic process                   | 0.03243        |

| <b>GO.ID</b> | <b>Term</b>                                 | <b>p.value</b> |
|--------------|---------------------------------------------|----------------|
| GO:0009733   | response to auxin                           | 0.0002         |
| GO:0034635   | glutathione transport                       | 0.00025        |
| GO:0007143   | female meiotic division                     | 0.00035        |
| GO:0080145   | cysteine homeostasis                        | 0.00127        |
| GO:0002221   | pattern recognition receptor signaling p... | 0.00127        |
| GO:1900384   | regulation of flavonol biosynthetic proc... | 0.00179        |
| GO:0006694   | steroid biosynthetic process                | 0.00233        |
| GO:0060774   | auxin mediated signaling pathway involve... | 0.00386        |
| GO:0060772   | leaf phyllotactic patterning                | 0.00564        |
| GO:0042761   | very long-chain fatty acid biosynthetic ... | 0.00603        |
| GO:0006075   | (1->3)-beta-D-glucan biosynthetic proces... | 0.00697        |
| GO:0000712   | resolution of meiotic recombination inte... | 0.00772        |
| GO:0019048   | modulation by virus of host morphology o... | 0.00829        |
| GO:0007140   | male meiosis                                | 0.00936        |
| GO:0002229   | defense response to oomycetes               | 0.01025        |
| GO:0009723   | response to ethylene                        | 0.01182        |
| GO:0002237   | response to molecule of bacterial origin    | 0.01294        |
| GO:0046686   | response to cadmium ion                     | 0.01312        |
| GO:0016050   | vesicle organization                        | 0.01455        |
| GO:0071333   | cellular response to glucose stimulus       | 0.01568        |
| GO:0010440   | stomatal lineage progression                | 0.01866        |
| GO:0090174   | organelle membrane fusion                   | 0.01937        |
| GO:0010228   | vegetative to reproductive phase transit... | 0.02041        |
| GO:0015866   | ADP transport                               | 0.02055        |
| GO:0009718   | anthocyanin-containing compound biosynth... | 0.02145        |
| GO:0009873   | ethylene-activated signaling pathway        | 0.02227        |
| GO:0010198   | synergid death                              | 0.02421        |
| GO:0051085   | chaperone mediated protein folding requi... | 0.02421        |
| GO:0071433   | cell wall repair                            | 0.02421        |
| GO:0034976   | response to endoplasmic reticulum stress    | 0.02636        |

j

| <b>GO.ID</b> | <b>Term</b>                                 | <b>p.value</b> |
|--------------|---------------------------------------------|----------------|
| GO:0030091   | protein repair                              | 0.000016       |
| GO:0006120   | mitochondrial electron transport, NADH t... | 0.000068       |
| GO:0042138   | meiotic DNA double-strand break formatio... | 0.00028        |
| GO:0034599   | cellular response to oxidative stress       | 0.0013         |
| GO:0043100   | pyrimidine nucleobase salvage               | 0.0014         |
| GO:0006557   | S-adenosylmethioninamine biosynthetic pr... | 0.00161        |
| GO:0016049   | cell growth                                 | 0.00178        |
| GO:0010582   | floral meristem determinacy                 | 0.0019         |
| GO:0007062   | sister chromatid cohesion                   | 0.00194        |
| GO:0019433   | triglyceride catabolic process              | 0.00233        |
| GO:0048193   | Golgi vesicle transport                     | 0.00317        |
| GO:0006734   | NADH metabolic process                      | 0.00347        |
| GO:0009051   | pentose-phosphate shunt, oxidative branc... | 0.0038         |
| GO:0006597   | spermine biosynthetic process               | 0.00413        |
| GO:0043086   | negative regulation of catalytic activit... | 0.0063         |
| GO:0007131   | reciprocal meiotic recombination            | 0.00671        |
| GO:0030244   | cellulose biosynthetic process              | 0.00697        |
| GO:0007129   | synapsis                                    | 0.00788        |
| GO:0000902   | cell morphogenesis                          | 0.00836        |
| GO:0034508   | centromere complex assembly                 | 0.00865        |
| GO:0006598   | polyamine catabolic process                 | 0.00916        |
| GO:0006739   | NADP metabolic process                      | 0.01028        |
| GO:0009908   | flower development                          | 0.01134        |
| GO:0010089   | xylem development                           | 0.0129         |
| GO:0008215   | spermine metabolic process                  | 0.01575        |
| GO:0010044   | response to aluminum ion                    | 0.01844        |
| GO:0010335   | response to non-ionic osmotic stress        | 0.01979        |
| GO:0006982   | response to lipid hydroperoxide             | 0.01979        |
| GO:0008295   | spermidine biosynthetic process             | 0.02263        |
| GO:0015986   | ATP synthesis coupled proton transport      | 0.02332        |

k

| <b>GO.ID</b> | <b>Term</b>                                 | <b>p.value</b> |
|--------------|---------------------------------------------|----------------|
| GO:2000025   | regulation of leaf formation                | 0.00014        |
| GO:0048653   | anther development                          | 0.0013         |
| GO:0010047   | fruit dehiscence                            | 0.00216        |
| GO:0080026   | response to indolebutyric acid              | 0.00226        |
| GO:0009901   | anther dehiscence                           | 0.00363        |
| GO:0006778   | porphyrin-containing compound metabolic ... | 0.00631        |
| GO:0006032   | chitin catabolic process                    | 0.00781        |
| GO:0018920   | glyphosate metabolic process                | 0.00948        |
| GO:0019877   | diaminopimelate biosynthetic process        | 0.01106        |
| GO:0048034   | heme O biosynthetic process                 | 0.01106        |
| GO:0043968   | histone H2A acetylation                     | 0.01106        |
| GO:0002679   | respiratory burst involved in defense re... | 0.01257        |
| GO:0043987   | histone H3-S10 phosphorylation              | 0.01263        |
| GO:0032259   | methylation                                 | 0.01396        |
| GO:0016998   | cell wall macromolecule catabolic proces... | 0.01408        |
| GO:0019307   | mannose biosynthetic process                | 0.01419        |
| GO:0071454   | cellular response to anoxia                 | 0.01888        |
| GO:0080153   | negative regulation of reductive pentose... | 0.01888        |
| GO:0010227   | floral organ abscission                     | 0.01996        |
| GO:0032465   | regulation of cytokinesis                   | 0.02355        |
| GO:0009647   | skotomorphogenesis                          | 0.02355        |
| GO:0071806   | protein transmembrane transport             | 0.02574        |
| GO:0006537   | glutamate biosynthetic process              | 0.02819        |
| GO:0010254   | nectary development                         | 0.02973        |
| GO:0006301   | postreplication repair                      | 0.03115        |
| GO:0006909   | phagocytosis                                | 0.03127        |
| GO:0015798   | myo-inositol transport                      | 0.03434        |
| GO:0055114   | oxidation-reduction process                 | 0.0366         |
| GO:0006811   | ion transport                               | 0.0384         |
| GO:0010434   | bract formation                             | 0.03894        |



1

| <b>GO.ID</b> | <b>Term</b>                                 | <b>p.value</b> |
|--------------|---------------------------------------------|----------------|
| GO:0043086   | negative regulation of catalytic activit... | 0.00069        |
| GO:0006778   | porphyrin-containing compound metabolic ... | 0.00261        |
| GO:0045490   | pectin catabolic process                    | 0.00274        |
| GO:0043132   | NAD transport                               | 0.00334        |
| GO:0010047   | fruit dehiscence                            | 0.00796        |
| GO:0080026   | response to indolebutyric acid              | 0.00815        |
| GO:0009901   | anther dehiscence                           | 0.01036        |
| GO:0006535   | cysteine biosynthetic process from serin... | 0.01036        |
| GO:0000027   | ribosomal large subunit assembly            | 0.01293        |
| GO:0009965   | leaf morphogenesis                          | 0.01341        |
| GO:0016925   | protein sumoylation                         | 0.01495        |
| GO:0010214   | seed coat development                       | 0.0268         |
| GO:0009106   | lipoate metabolic process                   | 0.03655        |
| GO:0018108   | peptidyl-tyrosine phosphorylation           | 0.03673        |
| GO:0042545   | cell wall modification                      | 0.04214        |
| GO:0009834   | plant-type secondary cell wall biogenesi... | 0.04549        |
| GO:0006546   | glycine catabolic process                   | 0.04762        |
| GO:0045893   | positive regulation of transcription, DN... | 0.04794        |
| GO:0009809   | lignin biosynthetic process                 | 0.0494         |
| GO:0048653   | anther development                          | 0.05032        |
| GO:0006636   | unsaturated fatty acid biosynthetic proc... | 0.06332        |
| GO:0009955   | adaxial/abaxial pattern specification       | 0.07463        |
| GO:0009073   | aromatic amino acid family biosynthetic ... | 0.07739        |
| GO:0006766   | vitamin metabolic process                   | 0.07843        |
| GO:0009684   | indoleacetic acid biosynthetic process      | 0.09161        |
| GO:0045454   | cell redox homeostasis                      | 0.09823        |
| GO:0015995   | chlorophyll biosynthetic process            | 0.10227        |
| GO:0009695   | jasmonic acid biosynthetic process          | 0.10982        |
| GO:0009220   | pyrimidine ribonucleotide biosynthetic p... | 0.12456        |
| GO:0009734   | auxin-activated signaling pathway           | 0.12752        |

**m**

| GO.ID      | Term                                        | p.value   |
|------------|---------------------------------------------|-----------|
| GO:0072660 | maintenance of protein location in plasm... | 0.0000093 |
| GO:0051245 | negative regulation of cellular defense ... | 0.000096  |
| GO:0072661 | protein targeting to plasma membrane        | 0.00012   |
| GO:0010148 | transpiration                               | 0.00041   |
| GO:0030036 | actin cytoskeleton organization             | 0.00406   |
| GO:0042981 | regulation of apoptotic process             | 0.0048    |
| GO:0001510 | RNA methylation                             | 0.00481   |
| GO:0051091 | positive regulation of sequence-specific... | 0.0073    |
| GO:0007346 | regulation of mitotic cell cycle            | 0.0077    |
| GO:1900057 | positive regulation of leaf senescence      | 0.00773   |
| GO:0016132 | brassinosteroid biosynthetic process        | 0.00833   |
| GO:0006457 | protein folding                             | 0.00948   |
| GO:0051607 | defense response to virus                   | 0.01154   |
| GO:0043574 | peroxisomal transport                       | 0.01157   |
| GO:0061025 | membrane fusion                             | 0.01213   |
| GO:0051403 | stress-activated MAPK cascade               | 0.01271   |
| GO:0042538 | hyperosmotic salinity response              | 0.01511   |
| GO:0010193 | response to ozone                           | 0.01524   |
| GO:0000028 | ribosomal small subunit assembly            | 0.01746   |
| GO:0009723 | response to ethylene                        | 0.01917   |
| GO:0050832 | defense response to fungus                  | 0.02137   |
| GO:0006446 | regulation of translational initiation      | 0.02163   |
| GO:0045995 | regulation of embryonic development         | 0.02214   |
| GO:0046396 | D-galacturonate metabolic process           | 0.02302   |
| GO:0010213 | non-photoreactive DNA repair                | 0.02302   |
| GO:0001561 | fatty acid alpha-oxidation                  | 0.02302   |
| GO:0043069 | negative regulation of programmed cell d... | 0.0244    |
| GO:0000398 | mRNA splicing, via spliceosome              | 0.02563   |
| GO:0015801 | aromatic amino acid transport               | 0.02681   |
| GO:0071479 | cellular response to ionizing radiation     | 0.02681   |

n

| GO.ID      | Term                                        | p.value  |
|------------|---------------------------------------------|----------|
| GO:0035435 | phosphate ion transmembrane transport       | 0.000011 |
| GO:1901684 | arsenate ion transmembrane transport        | 0.00045  |
| GO:0006891 | intra-Golgi vesicle-mediated transport      | 0.00312  |
| GO:0009873 | ethylene-activated signaling pathway        | 0.0057   |
| GO:0010270 | photosystem II oxygen evolving complex a... | 0.00684  |
| GO:0090359 | negative regulation of abscisic acid bio... | 0.00684  |
| GO:0080037 | negative regulation of cytokinin-activat... | 0.00769  |
| GO:0045723 | positive regulation of fatty acid biosyn... | 0.01025  |
| GO:0046167 | glycerol-3-phosphate biosynthetic proces... | 0.01025  |
| GO:1901959 | positive regulation of cutin biosyntheti... | 0.0111   |
| GO:0009877 | nodulation                                  | 0.0111   |
| GO:0016540 | protein autoprocessing                      | 0.01194  |
| GO:0061025 | membrane fusion                             | 0.01246  |
| GO:0015757 | galactose transport                         | 0.01279  |
| GO:0050691 | regulation of defense response to virus ... | 0.01449  |
| GO:0010583 | response to cyclopentenone                  | 0.01471  |
| GO:0015783 | GDP-fucose transport                        | 0.01533  |
| GO:0006168 | adenine salvage                             | 0.01786  |
| GO:0019563 | glycerol catabolic process                  | 0.01786  |
| GO:0010271 | regulation of chlorophyll catabolic proc... | 0.01955  |
| GO:0045910 | negative regulation of DNA recombination    | 0.01955  |
| GO:0010255 | glucose mediated signaling pathway          | 0.02039  |
| GO:0010188 | response to microbial phytotoxin            | 0.02039  |
| GO:0009833 | plant-type primary cell wall biogenesis     | 0.02039  |
| GO:0044209 | AMP salvage                                 | 0.02207  |
| GO:0009809 | lignin biosynthetic process                 | 0.023    |
| GO:0006270 | DNA replication initiation                  | 0.02331  |
| GO:0072334 | UDP-galactose transmembrane transport       | 0.02459  |
| GO:0015786 | UDP-glucose transport                       | 0.02542  |
| GO:0010389 | regulation of G2/M transition of mitotic... | 0.02639  |

0

| <b>GO.ID</b> | <b>Term</b>                                 | <b>p.value</b> |
|--------------|---------------------------------------------|----------------|
| GO:0031047   | gene silencing by RNA                       | 0.000073       |
| GO:0046256   | 2,4,6-trinitrotoluene catabolic process     | 0.00013        |
| GO:0006474   | N-terminal protein amino acid acetylatio... | 0.0004         |
| GO:0015969   | guanosine tetraphosphate metabolic proce... | 0.00047        |
| GO:0006000   | fructose metabolic process                  | 0.00056        |
| GO:0006003   | fructose 2,6-bisphosphate metabolic proc... | 0.00056        |
| GO:0031508   | pericentric heterochromatin assembly        | 0.00074        |
| GO:0090309   | positive regulation of methylation-depen... | 0.00074        |
| GO:0019281   | L-methionine biosynthetic process from h... | 0.00074        |
| GO:0016444   | somatic cell DNA recombination              | 0.00103        |
| GO:0043609   | regulation of carbon utilization            | 0.00119        |
| GO:1902039   | negative regulation of seed dormancy pro... | 0.00237        |
| GO:0006623   | protein targeting to vacuole                | 0.00291        |
| GO:0042594   | response to starvation                      | 0.00302        |
| GO:0009662   | etioplast organization                      | 0.00311        |
| GO:0080188   | RNA-directed DNA methylation                | 0.00352        |
| GO:0010207   | photosystem II assembly                     | 0.00383        |
| GO:0006002   | fructose 6-phosphate metabolic process      | 0.00387        |
| GO:0010424   | DNA methylation on cytosine within a CG ... | 0.00438        |
| GO:0009657   | plastid organization                        | 0.00444        |
| GO:0048838   | release of seed from dormancy               | 0.00534        |
| GO:0015749   | monosaccharide transport                    | 0.00584        |
| GO:0031935   | regulation of chromatin silencing           | 0.00688        |
| GO:0010030   | positive regulation of seed germination     | 0.00748        |
| GO:0009939   | positive regulation of gibberellic acid ... | 0.00753        |
| GO:0015691   | cadmium ion transport                       | 0.00934        |
| GO:0080086   | stamen filament development                 | 0.01005        |
| GO:0006878   | cellular copper ion homeostasis             | 0.01365        |
| GO:0003333   | amino acid transmembrane transport          | 0.01372        |
| GO:0006275   | regulation of DNA replication               | 0.01381        |

**p**

| <b>GO.ID</b> | <b>Term</b>                                 | <b>p.value</b> |
|--------------|---------------------------------------------|----------------|
| GO:0010160   | formation of organ boundary                 | 0.000079       |
| GO:0071555   | cell wall organization                      | 0.00066        |
| GO:0010541   | acropetal auxin transport                   | 0.00101        |
| GO:0009306   | protein secretion                           | 0.00225        |
| GO:0009740   | gibberellic acid mediated signaling path... | 0.00242        |
| GO:0050829   | defense response to Gram-negative bacter... | 0.00293        |
| GO:0080086   | stamen filament development                 | 0.00314        |
| GO:0010315   | auxin efflux                                | 0.00339        |
| GO:0010540   | basipetal auxin transport                   | 0.00472        |
| GO:0080167   | response to karrikin                        | 0.005          |
| GO:0010218   | response to far red light                   | 0.00883        |
| GO:0000387   | spliceosomal snRNP assembly                 | 0.01019        |
| GO:0006412   | translation                                 | 0.01277        |
| GO:0001510   | RNA methylation                             | 0.01327        |
| GO:0090058   | metaxylem development                       | 0.01422        |
| GO:0006407   | rRNA export from nucleus                    | 0.01422        |
| GO:0010941   | regulation of cell death                    | 0.01422        |
| GO:0009958   | positive gravitropism                       | 0.01612        |
| GO:0048443   | stamen development                          | 0.01651        |
| GO:0008380   | RNA splicing                                | 0.01673        |
| GO:0000395   | mRNA 5'-splice site recognition             | 0.01704        |
| GO:0009686   | gibberellin biosynthetic process            | 0.01781        |
| GO:0018108   | peptidyl-tyrosine phosphorylation           | 0.02032        |
| GO:0006098   | pentose-phosphate shunt                     | 0.0208         |
| GO:0000290   | deadenylation-dependent decapping of nuc... | 0.02265        |
| GO:0051649   | establishment of localization in cell       | 0.02284        |
| GO:1902358   | sulfate transmembrane transport             | 0.02326        |
| GO:0044571   | [2Fe-2S] cluster assembly                   | 0.02544        |
| GO:0010273   | detoxification of copper ion                | 0.02544        |
| GO:0010207   | photosystem II assembly                     | 0.02661        |

## q

| <b>GO.ID</b> | <b>Term</b>                                 | <b>p.value</b> |
|--------------|---------------------------------------------|----------------|
| GO:1900000   | regulation of anthocyanin catabolic proc... | 0.0000032      |
| GO:1901527   | abscisic acid-activated signaling pathwa... | 0.0000032      |
| GO:0010089   | xylem development                           | 0.00058        |
| GO:2000603   | regulation of secondary growth              | 0.00283        |
| GO:0051291   | protein heterooligomerization               | 0.00377        |
| GO:0046685   | response to arsenic-containing substance    | 0.00471        |
| GO:1901430   | positive regulation of syringal lignin b... | 0.00518        |
| GO:0090435   | protein localization to nuclear envelope    | 0.00565        |
| GO:0009102   | biotin biosynthetic process                 | 0.00799        |
| GO:0006430   | lysyl-tRNA aminoacylation                   | 0.00799        |
| GO:0048657   | anther wall tapetum cell differentiation    | 0.00799        |
| GO:0009690   | cytokinin metabolic process                 | 0.00826        |
| GO:0042631   | cellular response to water deprivation      | 0.01164        |
| GO:0007094   | mitotic spindle assembly checkpoint         | 0.01313        |
| GO:0010268   | brassinosteroid homeostasis                 | 0.01406        |
| GO:0010286   | heat acclimation                            | 0.01576        |
| GO:0010224   | response to UV-B                            | 0.01818        |
| GO:0045927   | positive regulation of growth               | 0.02517        |
| GO:0051259   | protein oligomerization                     | 0.02579        |
| GO:0051260   | protein homooligomerization                 | 0.04116        |
| GO:0048316   | seed development                            | 0.04446        |
| GO:0044237   | cellular metabolic process                  | 0.05082        |
| GO:0007049   | cell cycle                                  | 0.06919        |
| GO:0009911   | positive regulation of flower developmen... | 0.06929        |
| GO:0048767   | root hair elongation                        | 0.08761        |
| GO:0051645   | Golgi localization                          | 0.08847        |
| GO:0060151   | peroxisome localization                     | 0.08847        |
| GO:0051646   | mitochondrion localization                  | 0.09062        |
| GO:0009718   | anthocyanin-containing compound biosynth... | 0.0962         |
| GO:0006310   | DNA recombination                           | 0.09786        |

Supplementary Table 13. Number of *R*-genes absent in (a) non-synthetics and (b) synthetics.

**a**

| <b>Type/Morphotype</b> | <b>Accession</b>    | <b>No. of genes absent</b> |
|------------------------|---------------------|----------------------------|
| <b>Oilseed</b>         | Abukuma Natane      | 124                        |
|                        | Alaska              | 129                        |
|                        | Aragon              | 131                        |
|                        | Beluga              | 128                        |
|                        | CanberraxCourageDH  | 141                        |
|                        | Darmor- <i>bzh</i>  | 141                        |
|                        | DH5                 | 125                        |
|                        | Dippes              | 122                        |
|                        | E94197              | 124                        |
|                        | EVVIN               | 130                        |
|                        | Expert              | 133                        |
|                        | Gross Luesewitzer   | 121                        |
|                        | Jupiter             | 121                        |
|                        | Kromerska           | 117                        |
|                        | Major               | 125                        |
|                        | MSL007C             | 121                        |
|                        | Olimpiade           | 112                        |
|                        | Pacific             | 129                        |
|                        | Pirola              | 132                        |
|                        | Rapid               | 125                        |
|                        | Savannah            | 133                        |
| Tapidor                | 130                 |                            |
| Vivol                  | 138                 |                            |
| Wotan                  | 131                 |                            |
| <b>Average</b>         | <b>128</b>          |                            |
| <b>Fodder</b>          | English Giant 194   | 130                        |
|                        | Nunsdale            | 98                         |
|                        | Palu                | 119                        |
|                        | <b>Average</b>      | <b>116</b>                 |
| <b>Swede</b>           | Fortin              | 126                        |
|                        | Sensation           | 118                        |
|                        | <b>Average</b>      | <b>122</b>                 |
| <b>Vegetable</b>       | Chuosenhu           | 116                        |
|                        | Gruener Schnittkohl | 125                        |
|                        | <b>Average</b>      | <b>121</b>                 |

**b**

| Type/Morphotype  | Accession      | No. of genes absent |
|------------------|----------------|---------------------|
| <b>Synthetic</b> | CRY_1          | 85                  |
|                  | G50            | 121                 |
|                  | H149           | 120                 |
|                  | H165           | 118                 |
|                  | H176           | 123                 |
|                  | H44            | 102                 |
|                  | HIY_1          | 94                  |
|                  | MOY_4          | 97                  |
|                  | OLL1           | 85                  |
|                  | R_13_6         | 81                  |
|                  | R53            | 122                 |
|                  | R76            | 110                 |
|                  | Resyn-Go S4    | 129                 |
|                  | RS_10_7        | 91                  |
|                  | RS_4_6         | 108                 |
|                  | RS_7_6         | 88                  |
|                  | RS_8_6         | 113                 |
|                  | S_13           | 130                 |
|                  | S_39           | 115                 |
|                  | <b>Average</b> | <b>107</b>          |

The domains used to identify the *R-genes* are listed in Supplementary Table 18.

On average, the oilseed types, the synthetics, swedes, vegetable types and fodder types were missing 128, 107, 122, 121 and 116 candidate resistance genes, respectively.



Supplementary Table 14. Number of acyl lipid metabolism genes absent (a) non-synthetics and (b) synthetics.

**a**

| <b>Type/Morphotype</b> | <b>Accession</b>    | <b>No. of genes absent</b> |
|------------------------|---------------------|----------------------------|
| <b>Oilseed</b>         | Abukuma Natane      | 27                         |
|                        | Alaska              | 33                         |
|                        | Aragon              | 38                         |
|                        | Beluga              | 39                         |
|                        | CanberraxCourageDH  | 82                         |
|                        | Darmor- <i>bzh</i>  | 20                         |
|                        | DH5                 | 34                         |
|                        | Dippes              | 41                         |
|                        | E94197              | 73                         |
|                        | EVVIN               | 67                         |
|                        | Expert              | 44                         |
|                        | Gross Luesewitzer   | 27                         |
|                        | Jupiter             | 24                         |
|                        | Kromerska           | 13                         |
|                        | Major               | 50                         |
|                        | MSL007C             | 34                         |
|                        | Olimpiade           | 37                         |
|                        | Pacific             | 44                         |
|                        | Pirola              | 34                         |
|                        | Rapid               | 31                         |
|                        | Savannah            | 24                         |
| Tapidor                | 33                  |                            |
| Vivol                  | 28                  |                            |
| Wotan                  | 57                  |                            |
| <b>Average</b>         | <b>39</b>           |                            |
| <b>Fodder</b>          | English Giant 194   | 58                         |
|                        | Nunsdale            | 27                         |
|                        | Palu                | 87                         |
|                        | <b>Average</b>      | <b>57</b>                  |
| <b>Swede</b>           | Fortin              | 26                         |
|                        | Sensation           | 55                         |
|                        | <b>Average</b>      | <b>41</b>                  |
| <b>Vegetable</b>       | Chuosenhu           | 35                         |
|                        | Gruener Schnittkohl | 37                         |
|                        | <b>Average</b>      | <b>36</b>                  |

**b**

| Type/Morphotype  | Accession   | No. of genes absent |
|------------------|-------------|---------------------|
| <b>Synthetic</b> | CRY_1       | 32                  |
|                  | G50         | 34                  |
|                  | H149        | 35                  |
|                  | H165        | 31                  |
|                  | H176        | 24                  |
|                  | H44         | 62                  |
|                  | HIY_1       | 28                  |
|                  | MOY_4       | 28                  |
|                  | OLL1        | 69                  |
|                  | R_13_6      | 53                  |
|                  | R53         | 49                  |
|                  | R76         | 30                  |
|                  | Resyn-Go S4 | 16                  |
|                  | RS_10_7     | 38                  |
|                  | RS_4_6      | 36                  |
|                  | RS_7_6      | 77                  |
|                  | RS_8_6      | 50                  |
|                  | S_13        | 66                  |
|                  | S_39        | 45                  |
| <b>Average</b>   | <b>42</b>   |                     |

On average, the oilseeds, synthetics, swedes, vegetable types and fodder types were missing 39, 42, 41, 36 and 57 acyl lipid metabolism genes. However, these numbers would be biased due to the low sample number for the fodder types, swedes and vegetable types. However, when considering the unique instance of each gene in each morphotype, the synthetics were found to be missing the greatest number of genes (388) while the oilseeds were missing the least (129). Similarly, the fodder types, swedes and vegetable types were missing 57, 68 and 76 genes, respectively.

Supplementary Table 15. Number of GSL metabolism genes absent in (a) non-synthetics and (b) synthetics.

**a**

| Type/morphotype  | Accession           | Number of absent genes |
|------------------|---------------------|------------------------|
| <b>Oilseed</b>   | Abukuma Natane      | 2                      |
|                  | Alaska              | 0                      |
|                  | Aragon              | 2                      |
|                  | Beluga              | 4                      |
|                  | CanberraxCourageDH  | 1                      |
|                  | Darmor- <i>bzh</i>  | 2                      |
|                  | DH5                 | 4                      |
|                  | Dippes              | 2                      |
|                  | E94197              | 1                      |
|                  | EVVIN               | 3                      |
|                  | Expert              | 2                      |
|                  | Gross Luesewitzer   | 2                      |
|                  | Jupiter             | 4                      |
|                  | Kromerska           | 2                      |
|                  | Major               | 2                      |
|                  | MSL007C             | 1                      |
|                  | Olimpiade           | 2                      |
|                  | Pacific             | 6                      |
|                  | Pirola              | 3                      |
|                  | Rapid               | 1                      |
|                  | Savannah            | 2                      |
|                  | Tapidor             | 1                      |
|                  | Vivol               | 2                      |
| Wotan            | 1                   |                        |
| <b>Average</b>   | <b>2</b>            |                        |
| <b>Fodder</b>    | English Giant 194   | 3                      |
|                  | Palu                | 3                      |
|                  | Nunsdale            | 2                      |
|                  | <b>Average</b>      | <b>3</b>               |
| <b>Swede</b>     | Sensation           | 7                      |
|                  | Fortin              | 1                      |
|                  | <b>Average</b>      | <b>4</b>               |
| <b>Vegetable</b> | Gruener Schnittkohl | 6                      |
|                  | Chuosenshu          | 5                      |
|                  | <b>Average</b>      | <b>6</b>               |

**b**

| Type/morphotype | Accession      | Number of absent genes |
|-----------------|----------------|------------------------|
| Synthetic       | CRY 1          | 5                      |
|                 | G50            | 8                      |
|                 | H149           | 4                      |
|                 | H165           | 7                      |
|                 | H176           | 2                      |
|                 | H44            | 4                      |
|                 | HIY 1          | 2                      |
|                 | MOY 4          | 1                      |
|                 | OLL1           | 1                      |
|                 | R 13 6         | 0                      |
|                 | R53            | 12                     |
|                 | R76            | 8                      |
|                 | Resyn-Go S4    | 2                      |
|                 | RS 10 7        | 5                      |
|                 | RS 4 6         | 8                      |
|                 | RS 7 6         | 2                      |
|                 | RS 8 6         | 2                      |
|                 | S 13           | 3                      |
|                 | S 39           | 7                      |
|                 | <b>Average</b> | <b>4</b>               |

On average, the oilseeds, synthetics, swedes, vegetable types and fodder types were missing 2, 4, 4, 6 and 3 GSL metabolism genes. However, these numbers would be biased due to the low sample number for the fodder types, swedes and vegetable types. However, when considering the unique instance of each gene in each morphotype, the synthetics were found to be missing the greatest number of genes (46) while the oilseeds were missing the least (13). Similarly, the fodder types, swedes and vegetable types were missing 4, 7 and 7, respectively.

Supplementary Table 16. Reads used for pangenome assembly.

| <b>Name</b>              | <b>Technology</b> | <b>Insert size</b> | <b>No. of reads</b> | <b>Coverage</b> |
|--------------------------|-------------------|--------------------|---------------------|-----------------|
| Tapidor                  | Illumina MP       | 3000-8000          | 232856562           | 21.64           |
| Tapidor                  | Illumina PE       | 200-500            | 591898425           | 58.87           |
| Dippes                   | Illumina PE       | 190                | 153357542           | 13.57           |
| Gross-Luesewitzer        | Illumina PE       | 180                | 188295366           | 16.66           |
| Jupiter                  | Illumina PE       | 289                | 165366150           | 14.63           |
| Kromerska                | Illumina PE       | 298                | 442905328           | 39.2            |
| Major                    | Illumina PE       | 194                | 172830694           | 15.29           |
| Skziverskij              | Illumina PE       | 208                | 87711118            | 7.76            |
| Start                    | Illumina PE       | 214                | 96472964            | 8.54            |
| Aragon                   | Illumina PE       | 200                | 233093964           | 20.63           |
| Beluga                   | Illumina PE       | 192                | 176014670           | 15.58           |
| Olimpiade                | Illumina PE       | 171                | 150272844           | 13.3            |
| Wotan                    | Illumina PE       | 202                | 198746940           | 17.59           |
| Canberra x<br>Courage DH | Illumina PE       | 301                | 162726868           | 14.4            |
| Resyn-Go S4              | Illumina PE       | 227                | 117449460           | 10.39           |
| Alaska                   | Illumina PE       | 196                | 219654046           | 19.44           |
| Pirola                   | Illumina PE       | 160                | 133394340           | 11.8            |
| Rapid                    | Illumina PE       | 207                | 175722650           | 15.55           |
| Pacific                  | Illumina PE       | 311                | 120115248           | 10.63           |
| Savannah                 | Illumina PE       | 312                | 179264778           | 15.86           |
| Vivol                    | Illumina PE       | 319                | 168422320           | 14.9            |
| Expert                   | Illumina PE       | 200                | 181589328           | 16.07           |
| G 50                     | Illumina PE       | 178                | 138584190           | 12.26           |
| H44                      | Illumina PE       | 303                | 162685050           | 14.4            |
| H 149                    | Illumina PE       | 180                | 239431864           | 21.19           |
| H 165                    | Illumina PE       | 172                | 168442916           | 14.91           |
| H 176                    | Illumina PE       | 158                | 122837286           | 10.87           |
| R53                      | Illumina PE       | 296                | 167093140           | 14.79           |
| R76                      | Illumina PE       | 317                | 197589982           | 17.49           |
| RS 4/6                   | Illumina PE       | 304                | 162966518           | 14.42           |
| RS 10/7                  | Illumina PE       | 204                | 189715046           | 16.79           |
| RS 13/6                  | Illumina PE       | 293                | 165220254           | 14.62           |
| S 13                     | Illumina PE       | 212                | 141930992           | 12.56           |
| OLL 1                    | Illumina PE       | 169                | 253552706           | 22.44           |
| Chuosenhu                | Illumina PE       | 191                | 200311236           | 17.73           |
| Grüner Schnittkohl       | Illumina PE       | 185                | 142128628           | 12.58           |
| R 99                     | Illumina PE       | 158                | 100203212           | 8.87            |
| RS 7/6                   | Illumina PE       | 199                | 178669242           | 15.81           |
| RS 8/6                   | Illumina PE       | 197                | 224506148           | 19.87           |

|                       |             |     |           |       |
|-----------------------|-------------|-----|-----------|-------|
| S 39                  | Illumina PE | 209 | 188940778 | 16.72 |
| CRY 1                 | Illumina PE | 307 | 181589328 | 16.07 |
| HIY 1                 | Illumina PE | 306 | 156257896 | 13.83 |
| MOY 4                 | Illumina PE | 306 | 158120246 | 13.99 |
| English Giant 194     | Illumina PE | 303 | 167224372 | 14.8  |
| Nunsdale              | Illumina PE | 179 | 182828324 | 16.18 |
| Palu                  | Illumina PE | 161 | 200369820 | 17.73 |
| Abukuma Natane        | Illumina PE | 204 | 196171476 | 17.36 |
| E94197                | Illumina PE | 199 | 222812810 | 19.72 |
| Evvin                 | Illumina PE | 199 | 184506352 | 16.33 |
| Fortin Family         | Illumina PE | 198 | 161362924 | 14.28 |
| Sensation NZ          | Illumina PE | 209 | 156426460 | 13.84 |
| DH 5<br>(Oase*Nugget) | Illumina PE | 204 | 297313104 | 26.31 |
| MSL007C               | Illumina PE | 292 | 230282774 | 20.38 |

Supplementary Table 17. Pfam domains used to identify TE genes.

|                          |                                                                                                                                                                                                                                                                                                                                                                                                                                                                                                                                                                                                                                                                                                                                                                                                                                                                                                                                                                                                                                                                                                                                         |
|--------------------------|-----------------------------------------------------------------------------------------------------------------------------------------------------------------------------------------------------------------------------------------------------------------------------------------------------------------------------------------------------------------------------------------------------------------------------------------------------------------------------------------------------------------------------------------------------------------------------------------------------------------------------------------------------------------------------------------------------------------------------------------------------------------------------------------------------------------------------------------------------------------------------------------------------------------------------------------------------------------------------------------------------------------------------------------------------------------------------------------------------------------------------------------|
| <b>Pfam domains used</b> | PF00075,PF00077,PF00078,PF00098,PF00424,PF00429,PF00469,PF00516,PF00517,PF00522,PF00539,PF00540,PF00552,PF00558,PF00559,PF00589,PF00607,PF00665,PF00692,PF00872,PF00906,PF00971,PF00979,PF01021,PF01045,PF01054,PF01140,PF01141,PF01359,PF01385,PF01498,PF01526,PF01527,PF01548,PF01609,PF01610,PF01695,PF01710,PF01797,PF02022,PF02093,PF02228,PF02281,PF02316,PF02337,PF02371,PF02411,PF02720,PF02813,PF02892,PF02914,PF02920,PF02959,PF02992,PF02994,PF02998,PF03004,PF03017,PF03050,PF03056,PF03078,PF03108,PF03184,PF03221,PF03274,PF03276,PF03400,PF03408,PF03539,PF03708,PF03716,PF03732,PF03811,PF04094,PF04160,PF04195,PF04218,PF04236,PF04582,PF04693,PF04740,PF04754,PF04827,PF04937,PF04986,PF05052,PF05344,PF05380,PF05399,PF05457,PF05485,PF05598,PF05599,PF05621,PF05699,PF05717,PF05754,PF05840,PF05851,PF05858,PF05928,PF06527,PF06815,PF06817,PF07253,PF07282,PF07567,PF07572,PF07592,PF07727,PF07999,PF08284,PF08333,PF08483,PF08705,PF08721,PF08722,PF08723,PF09035,PF09039,PF09077,PF09293,PF09299,PF09322,PF13966,PF10551,PF13456,PF14223,PF01107,PF13952,PF13963,PF13975,PF13976,PF14214,PF14227,PF14244,PF14372 |
|--------------------------|-----------------------------------------------------------------------------------------------------------------------------------------------------------------------------------------------------------------------------------------------------------------------------------------------------------------------------------------------------------------------------------------------------------------------------------------------------------------------------------------------------------------------------------------------------------------------------------------------------------------------------------------------------------------------------------------------------------------------------------------------------------------------------------------------------------------------------------------------------------------------------------------------------------------------------------------------------------------------------------------------------------------------------------------------------------------------------------------------------------------------------------------|

Supplementary Table 18. Domains used to identify *R*-genes.

| <b>Domain name</b> | <b>pfam</b> |
|--------------------|-------------|
| TIR2               | PF13676     |
| TIR                | PF01582     |
| NB-ARC             | PF00931     |
| LRR_1              | PF00560     |
| LRR_2              | PF07723     |
| LRR_3              | PF07725     |
| LRR_4              | PF12799     |
| LRR_5              | PF13306     |
| LRR_6              | PF13516     |
| LRR_7              | PF13855     |
| LRR_8              | PF14580     |

The Coils database was used to identify CC domains.



Supplementary Table 19. Order of accession on Circos plot for (a) non-synthetics and (b) synthetics.

**a**

| <b>Accession</b>   | <b>Order</b> |
|--------------------|--------------|
| Abukuma Natane     | 1            |
| Alaska             | 2            |
| Aragon             | 3            |
| Beluga             | 4            |
| CanberraxCourageDH | 5            |
| Chuosenhu          | 6            |
| Darmor- <i>bzh</i> | 7            |
| DH5                | 8            |
| Dippes             | 9            |
| E94197             | 10           |
| English Giant 194  | 11           |
| EVVIN              | 12           |
| Expert             | 13           |
| Fortin             | 14           |
| Gross Luesewitzer  | 15           |
| Gruner Schnittkohl | 16           |
| Jupiter            | 17           |
| Kromerska          | 18           |
| Major              | 19           |
| MSL007C            | 20           |
| Nunsdale           | 21           |
| Olimpiade          | 22           |
| Pacific            | 23           |
| Palu               | 24           |
| Pirola             | 25           |
| Rapid              | 26           |
| Savannah           | 27           |
| Sensation          | 28           |
| Tapidor            | 29           |
| Vivol              | 30           |
| Wotan              | 31           |

**b**

| <b>Accession</b> | <b>Order</b> |
|------------------|--------------|
| CRY 1            | 32           |
| G50              | 33           |
| H149             | 34           |
| H165             | 35           |
| H176             | 36           |
| H44              | 37           |
| HIY 1            | 38           |
| MOY 4            | 39           |
| OLL1             | 40           |
| R 13 6           | 41           |
| R53              | 42           |
| R76              | 43           |
| Resyn-Go S4      | 44           |
| RS 10 7          | 45           |
| RS 4 6           | 46           |
| RS 7 6           | 47           |
| RS 8 6           | 48           |
| S 13             | 49           |
| S 39             | 50           |

The order in which the accessions appear (outer to inner) on the circos plots (Supplementary Figure 1). The synthetic accessions are represented by orange dots (and orange circles) and the non-synthetic accessions are represented by blue dots (and blue circles).
