# Supplementary material
Source: PubMed Central journal article supplement (PMC11629803)
Supplement: PBI-16-1265-s004.pdf [file PBI-16-1265-s004.pdf]

**a**

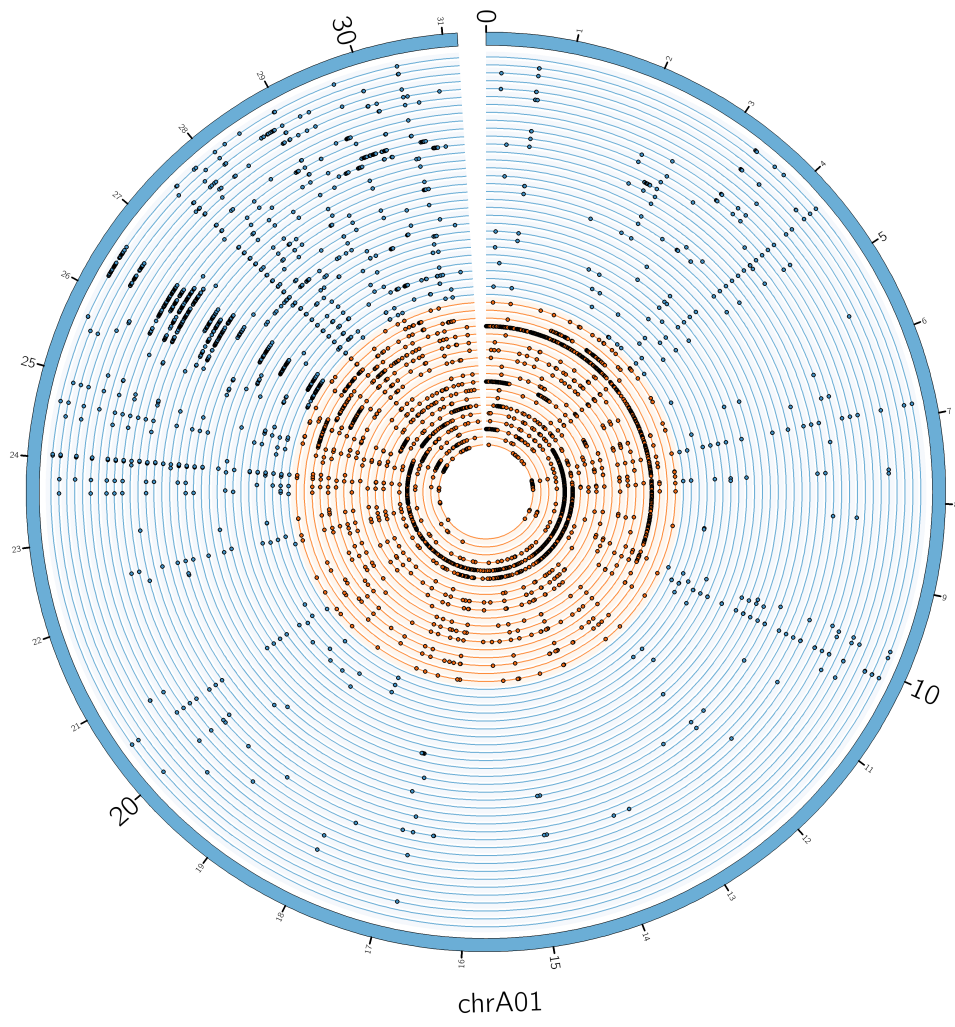

**b**

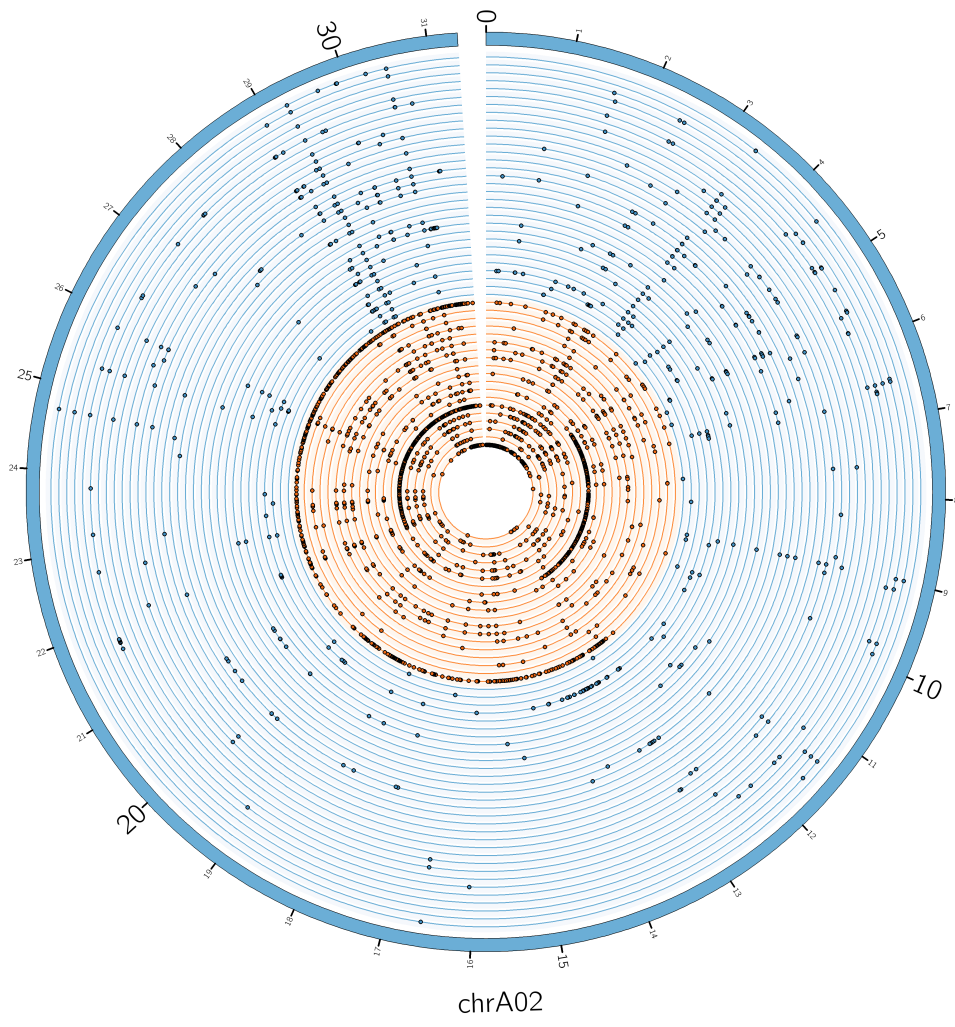



c

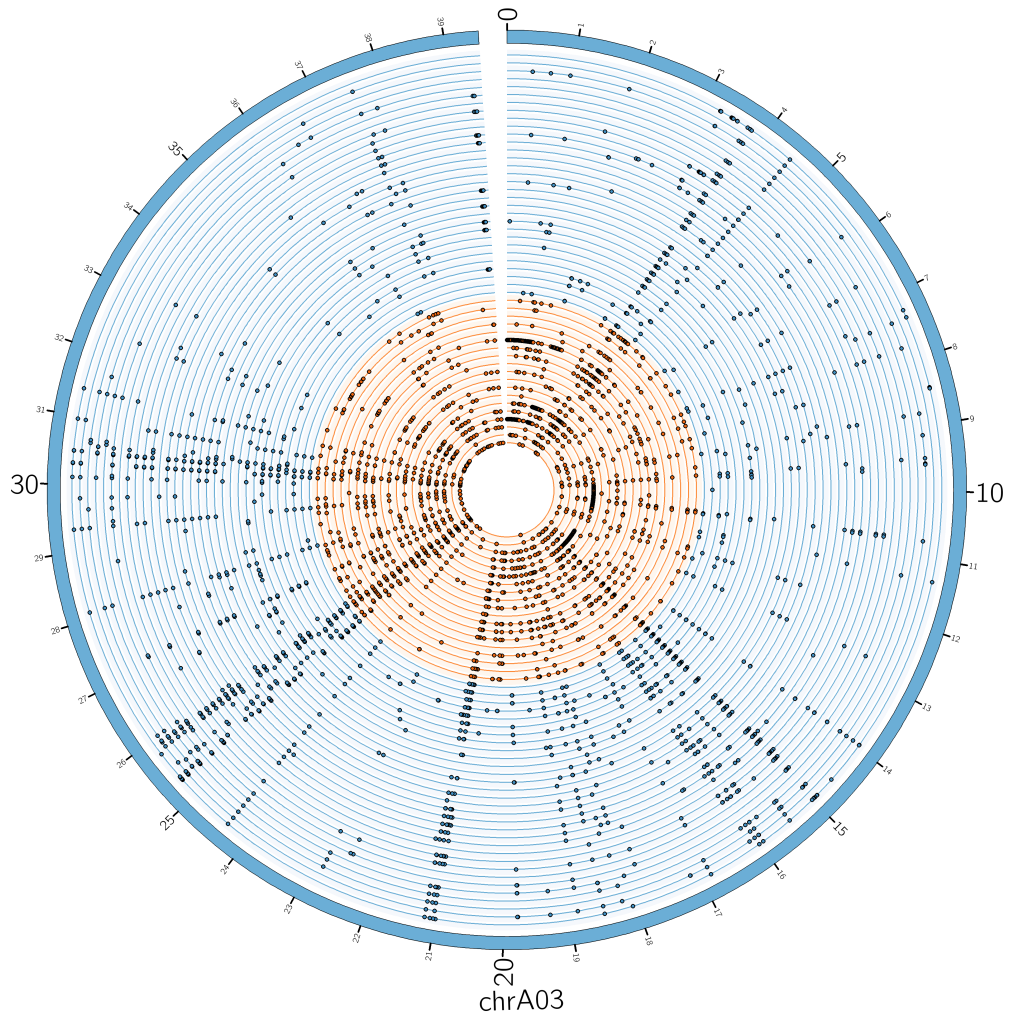

**d**

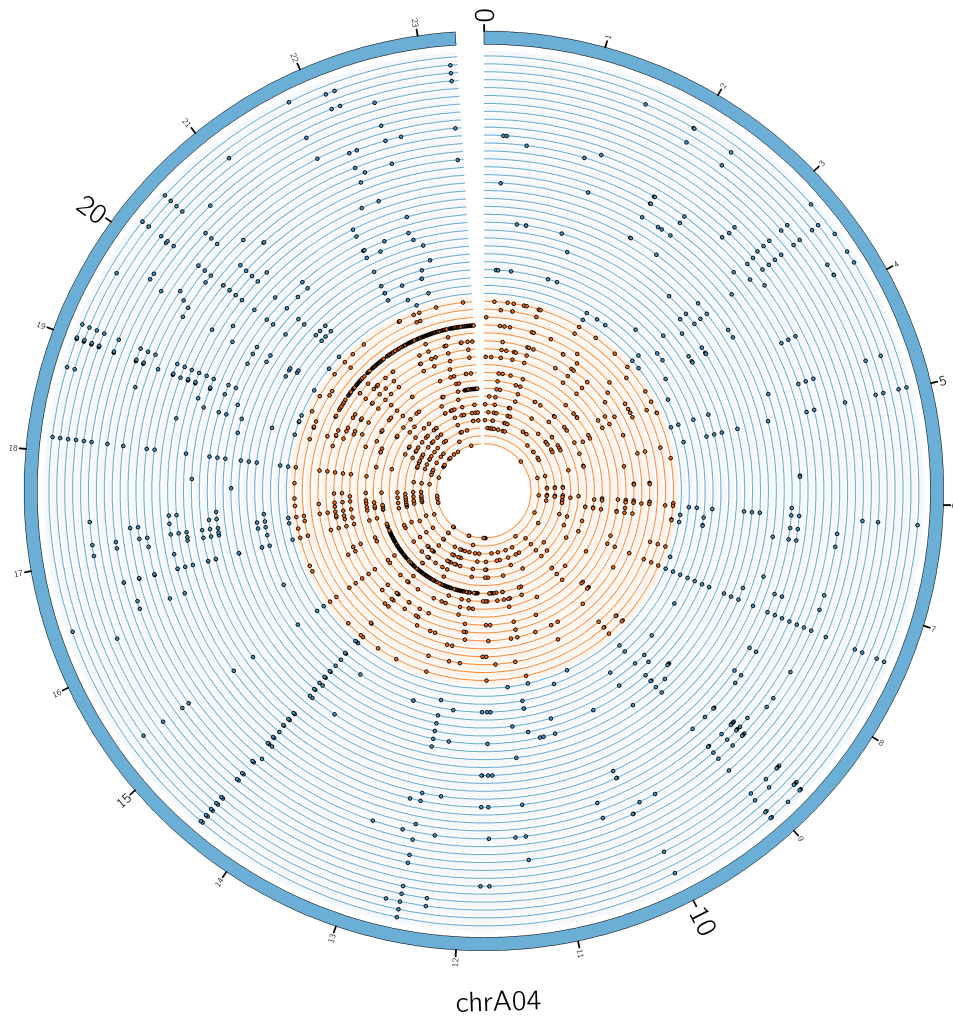

e

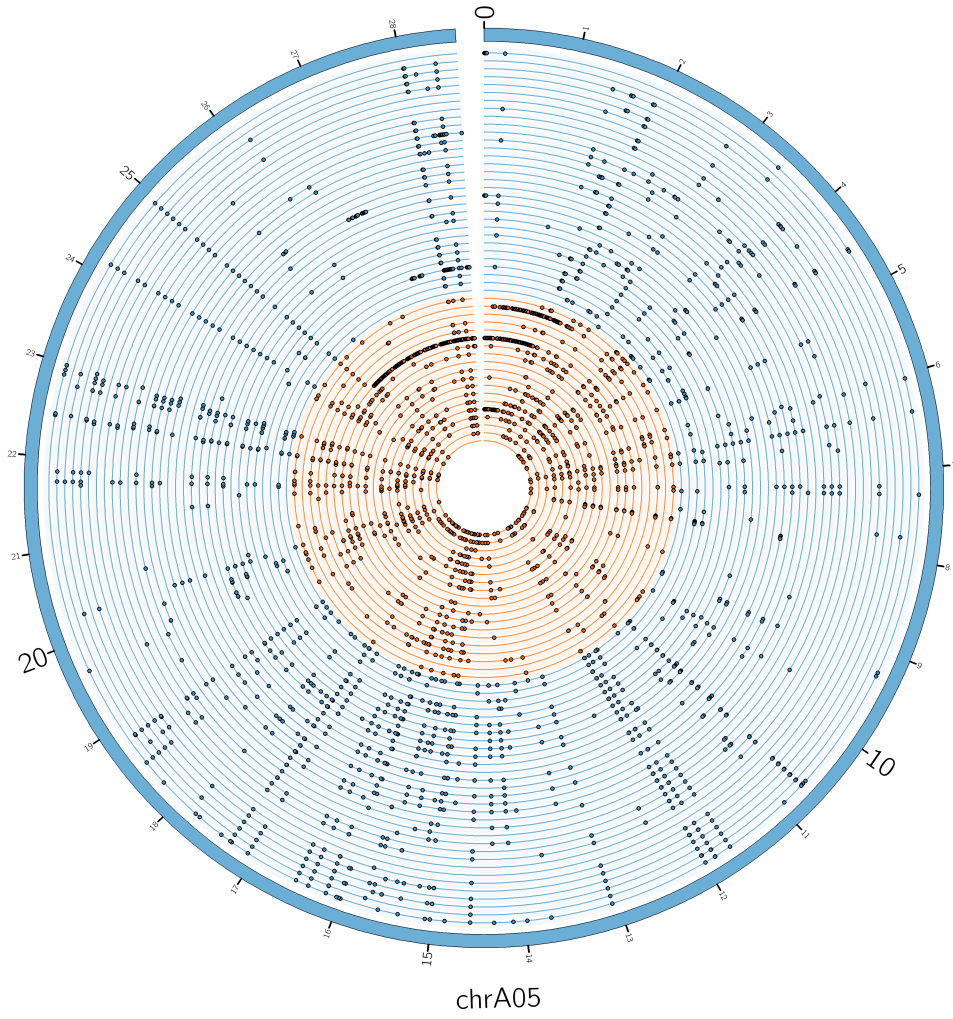

**f**

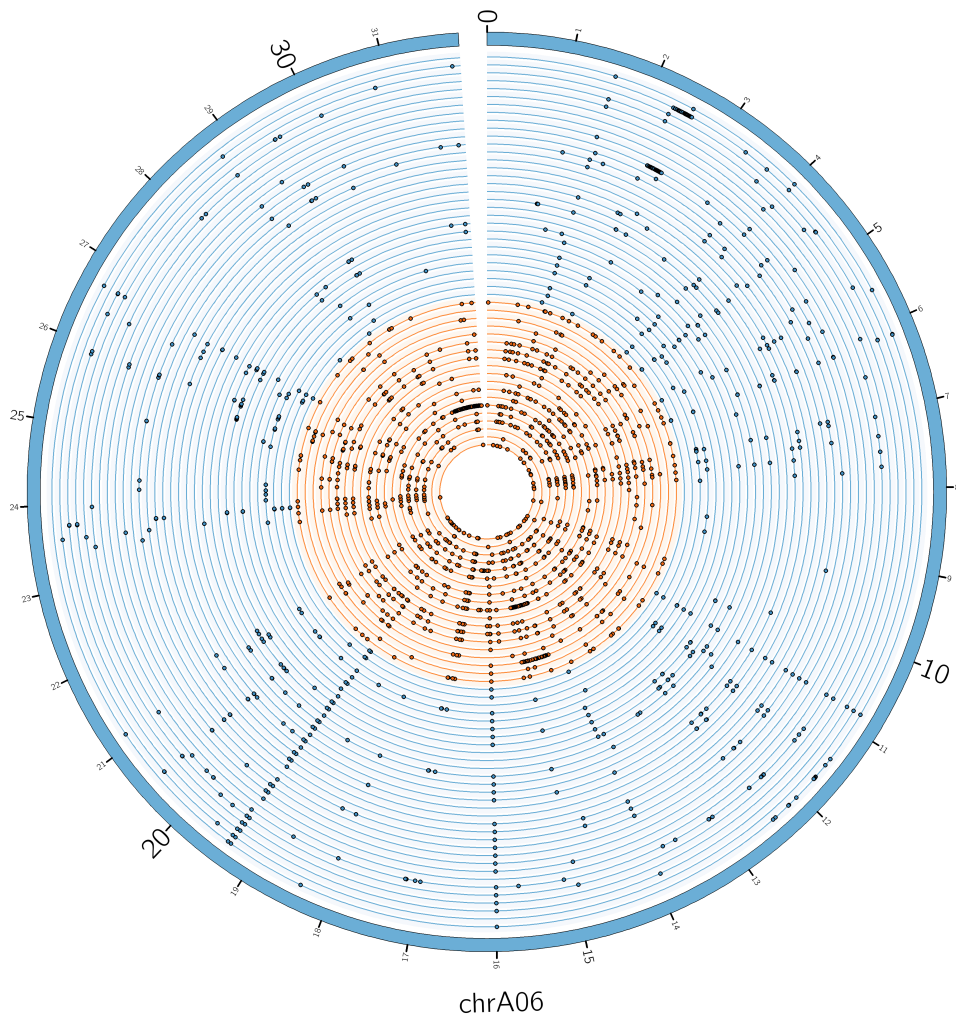



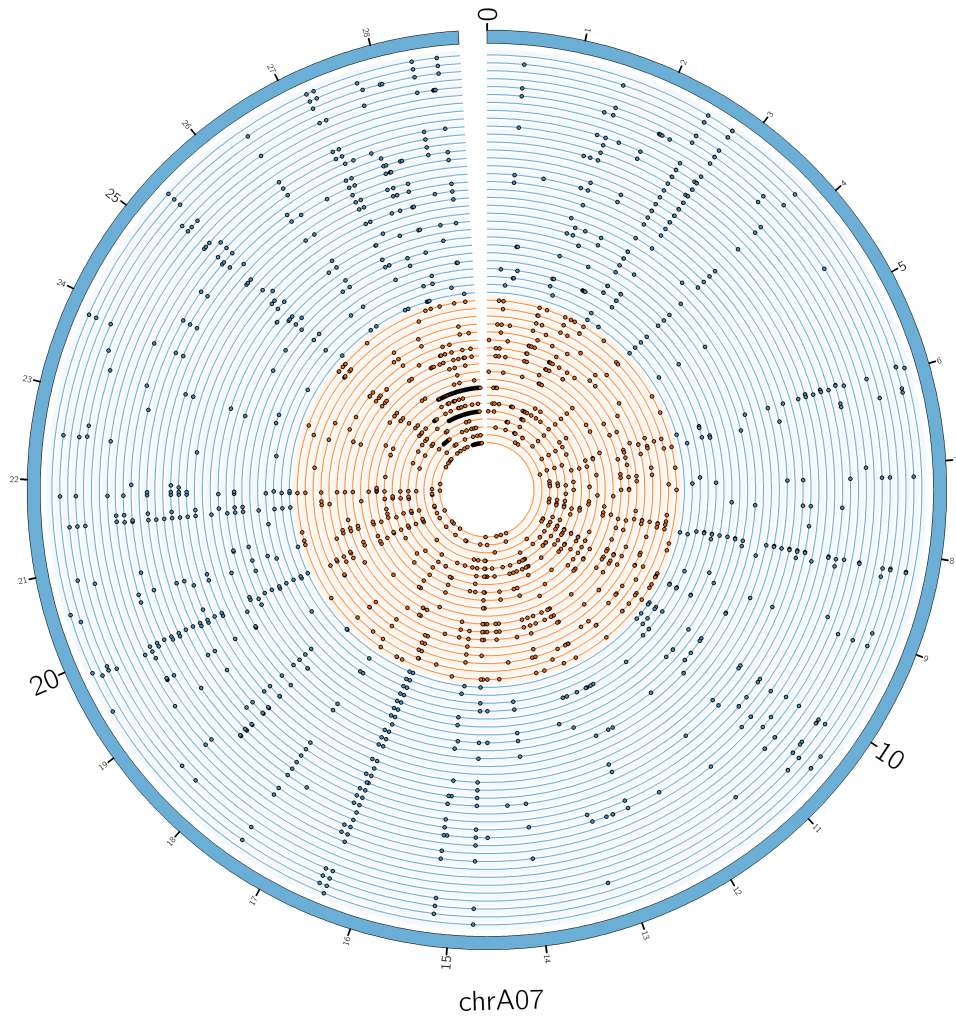

**h**

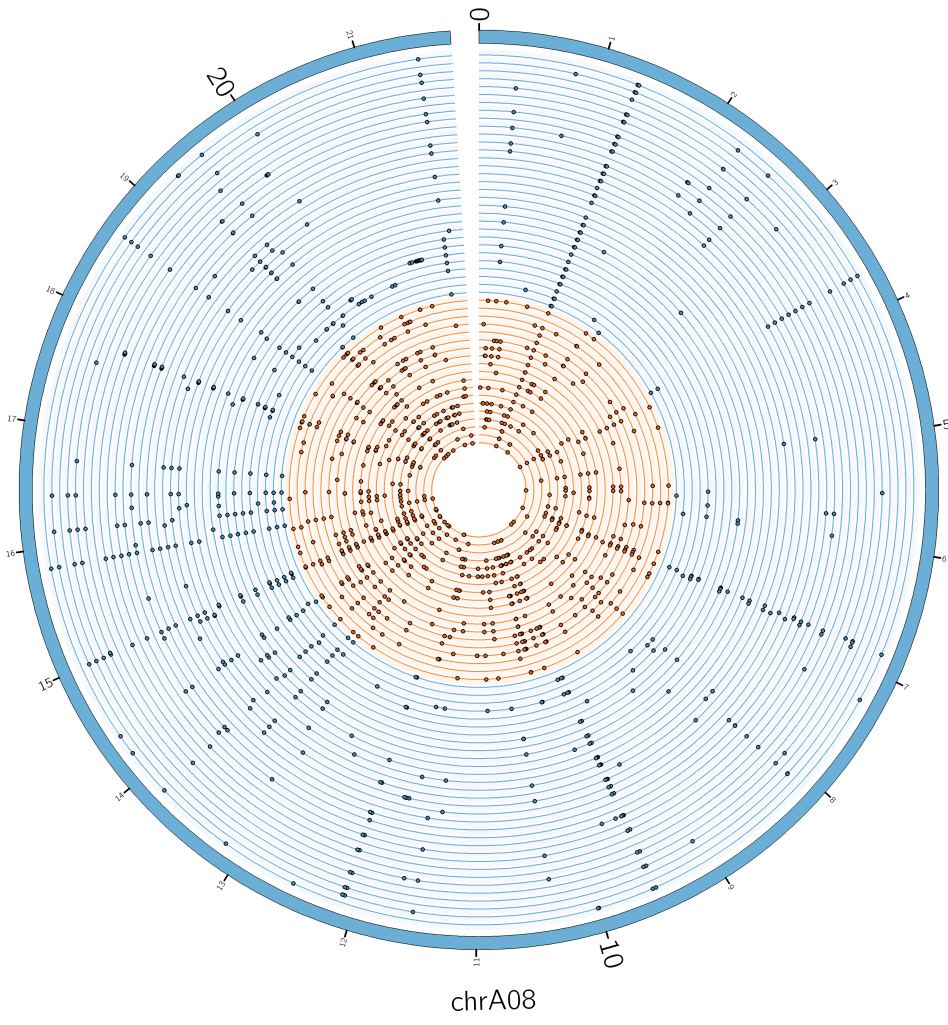

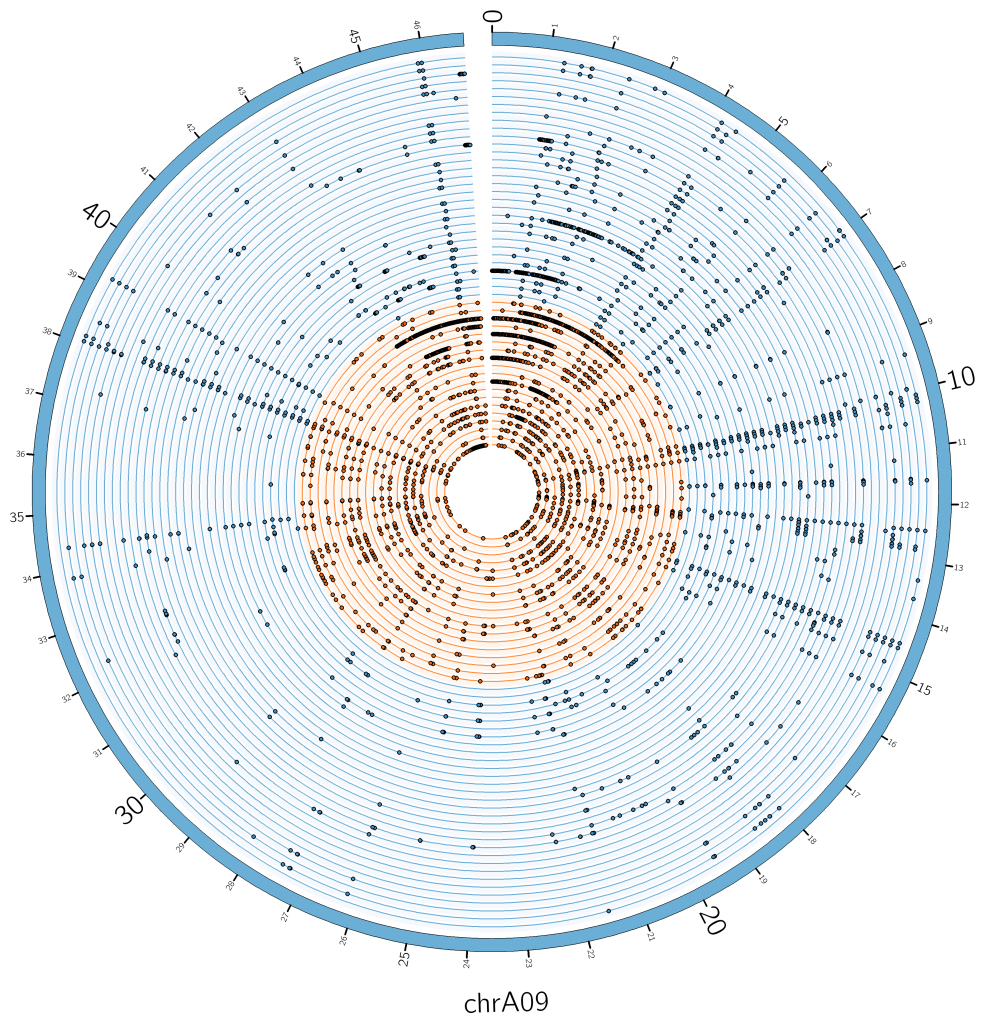

j

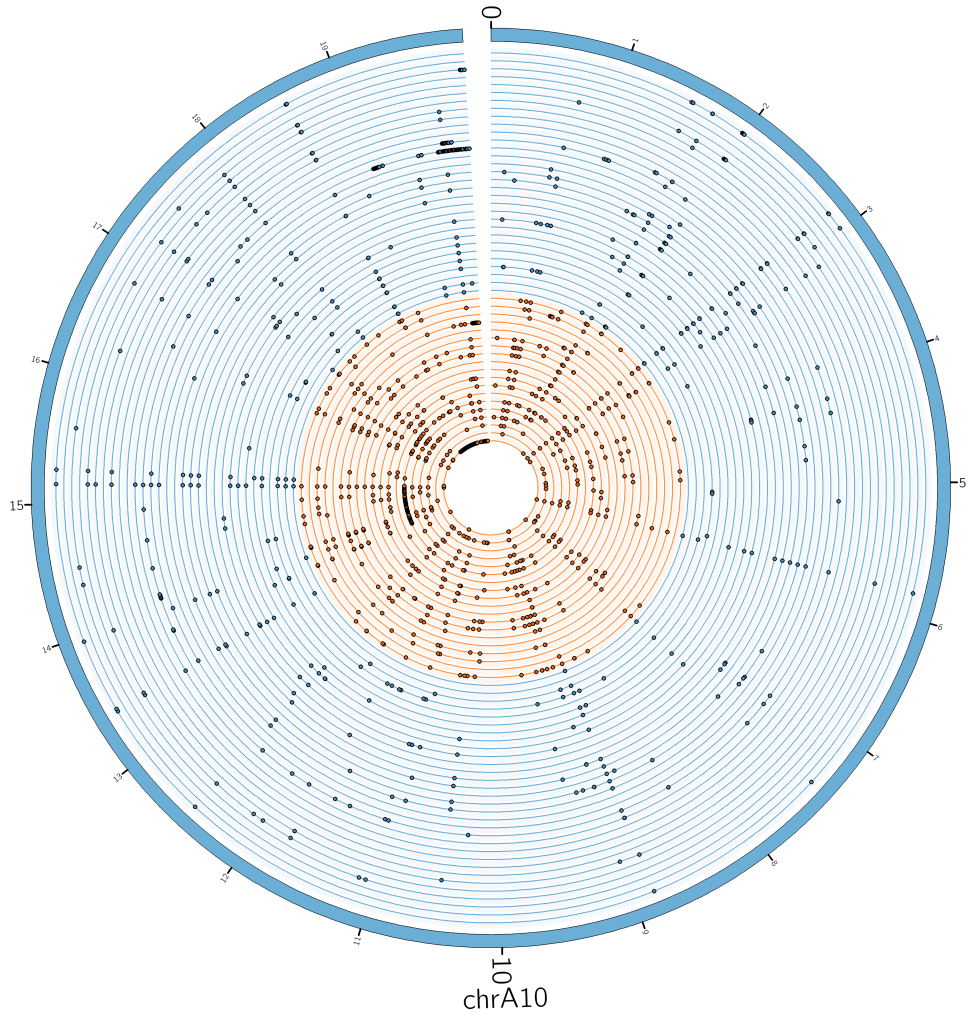



k

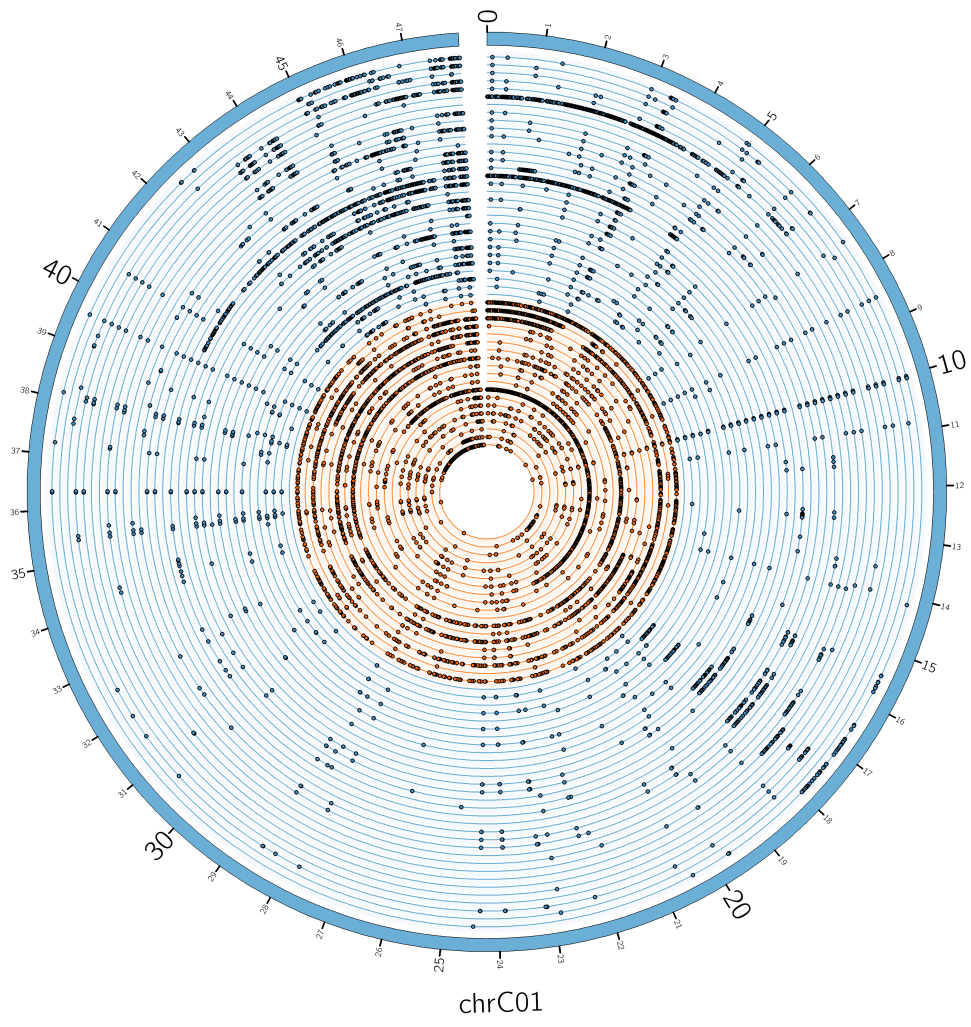

I

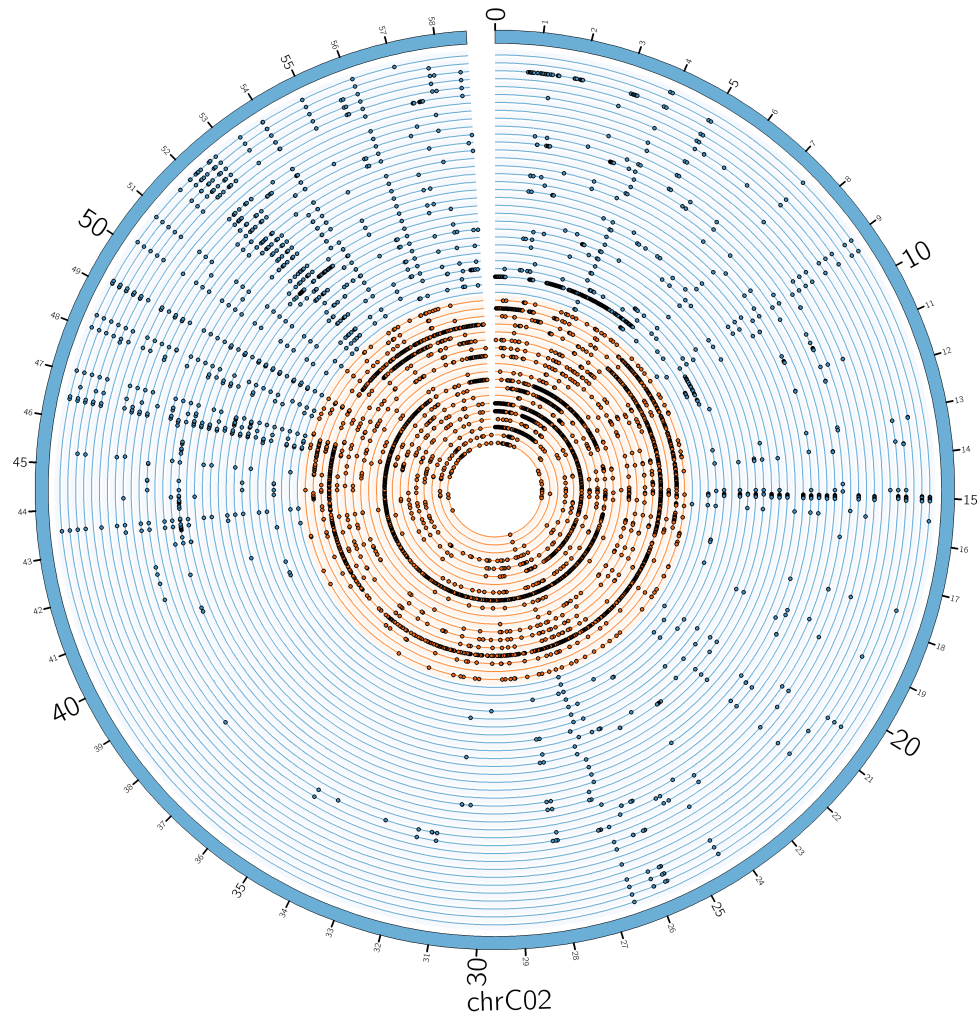

**m**

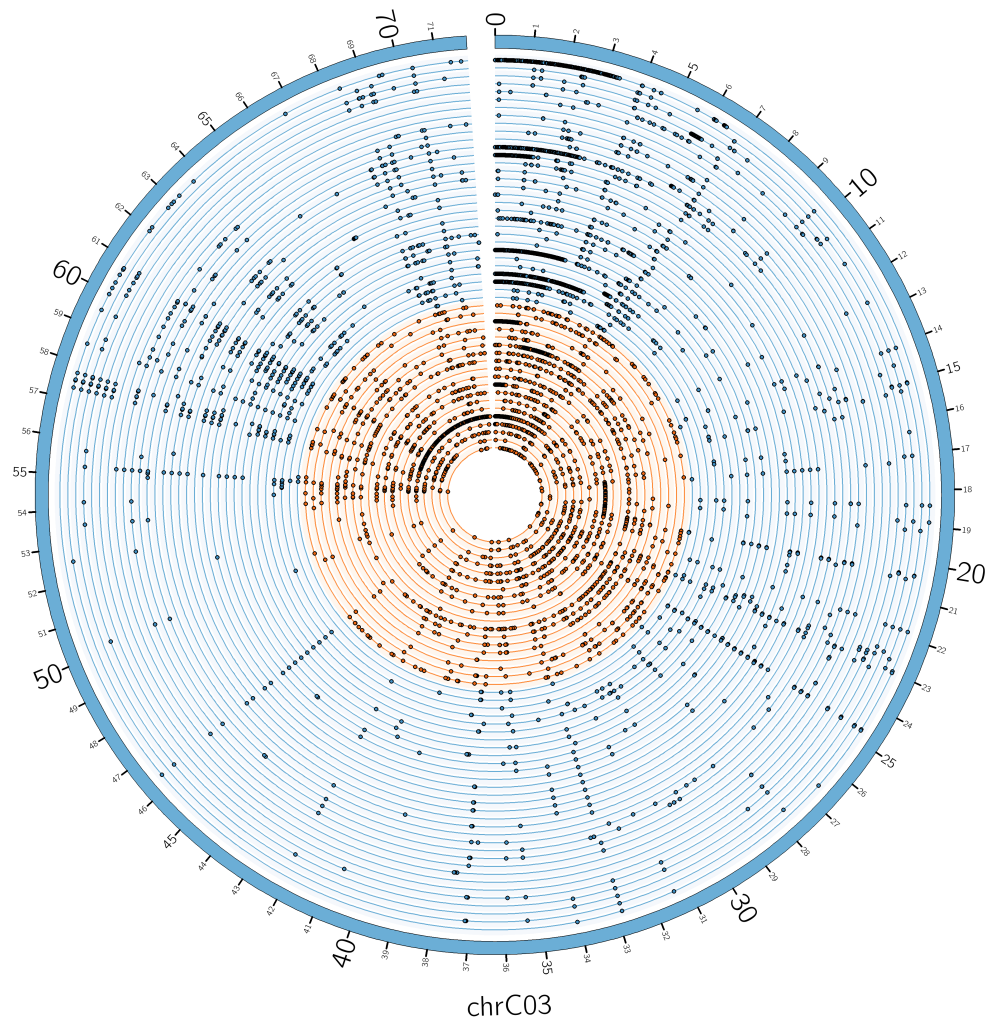

n

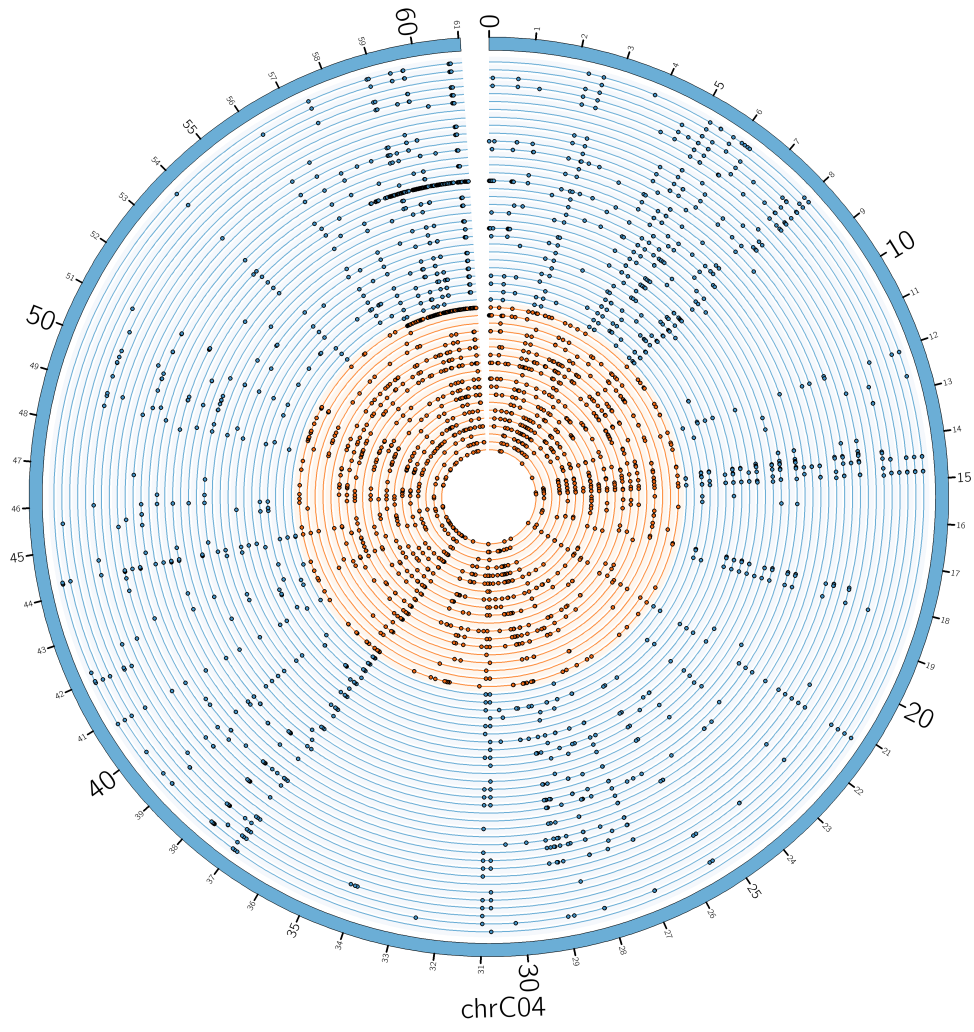



0

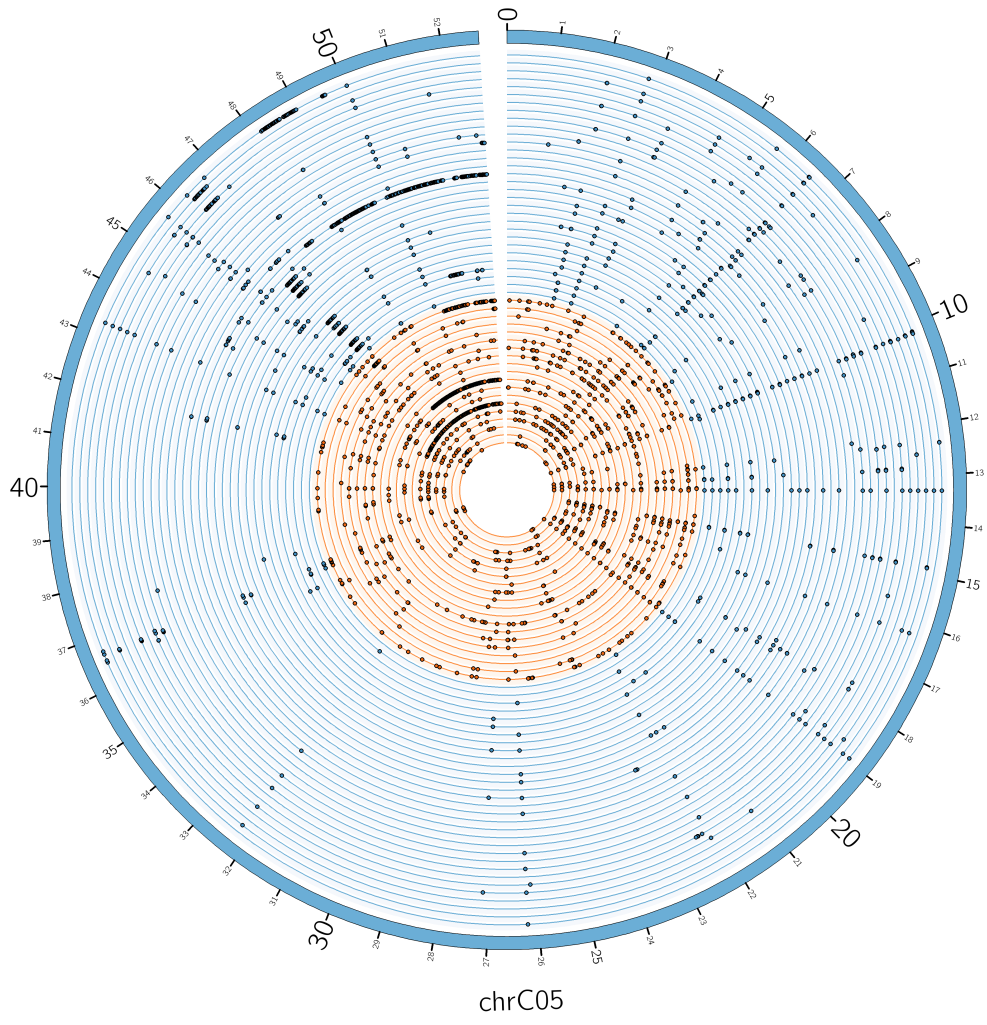

p

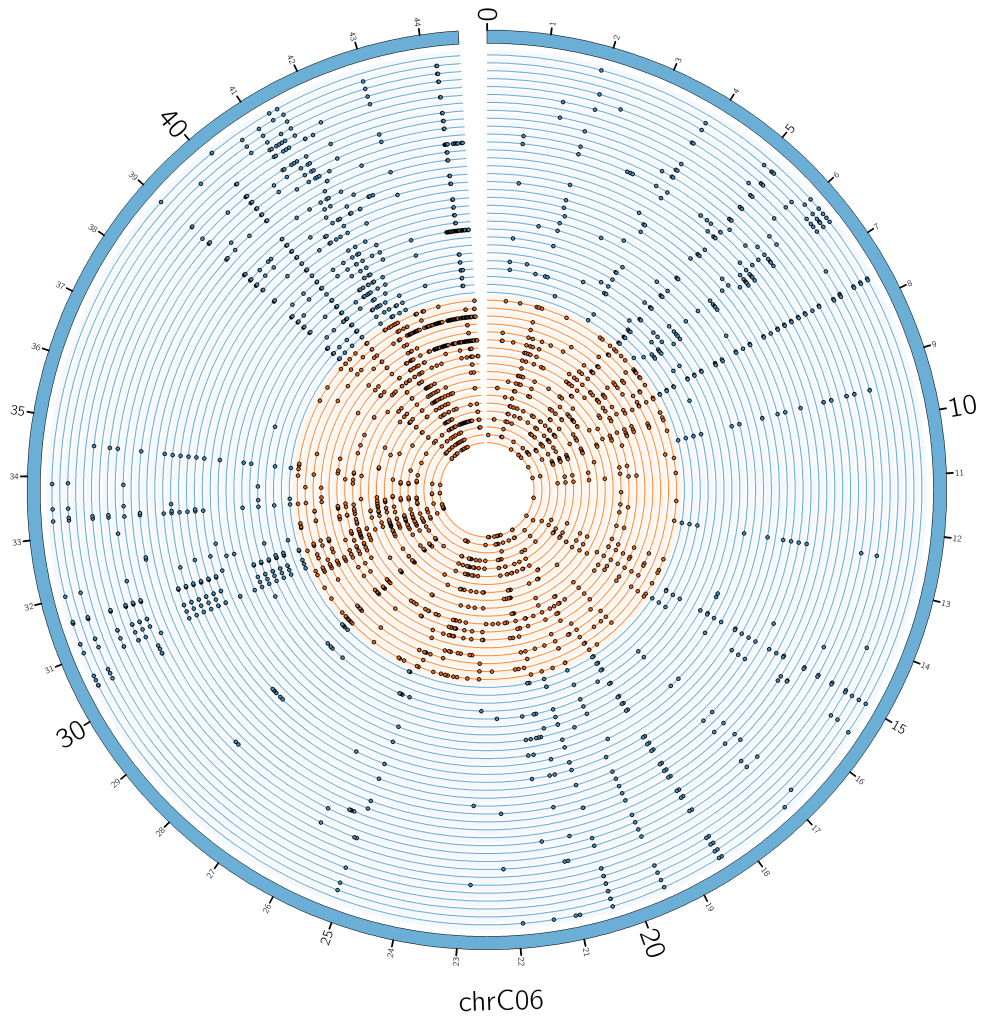

q

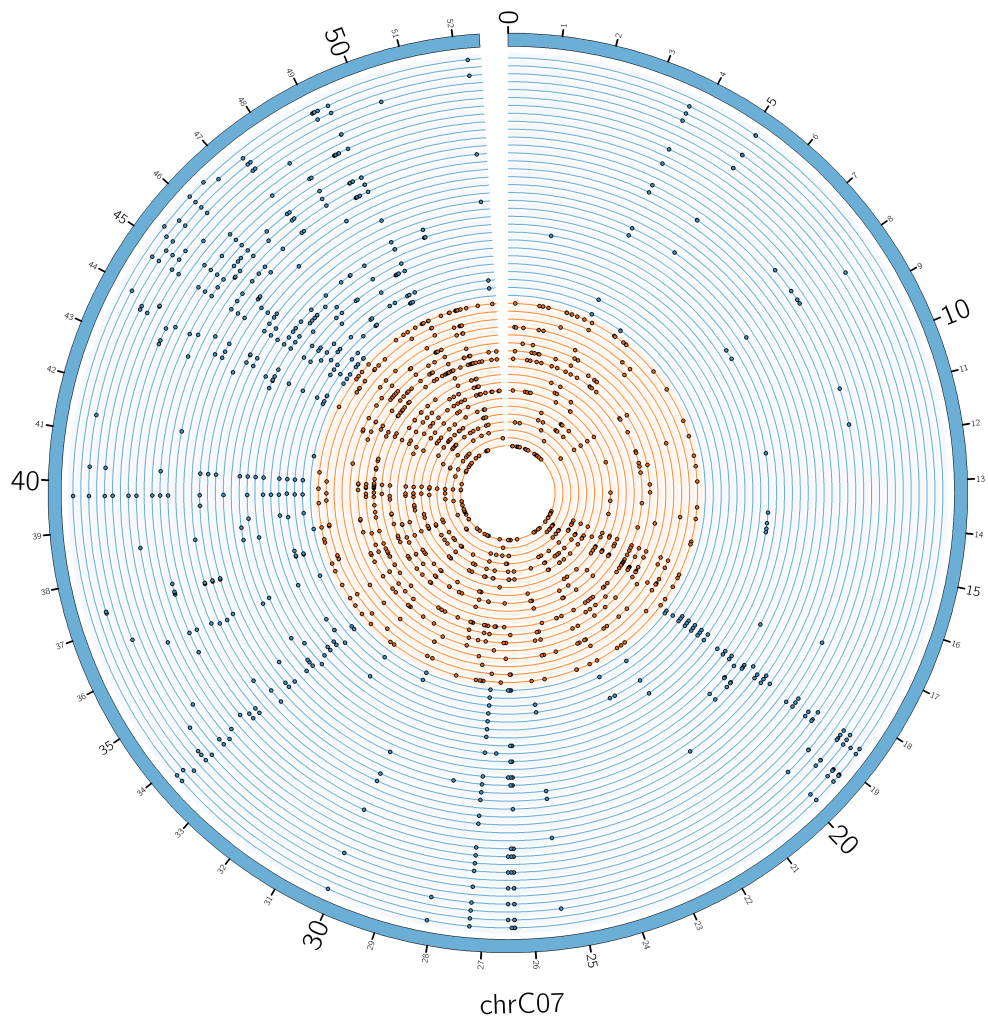

**r**

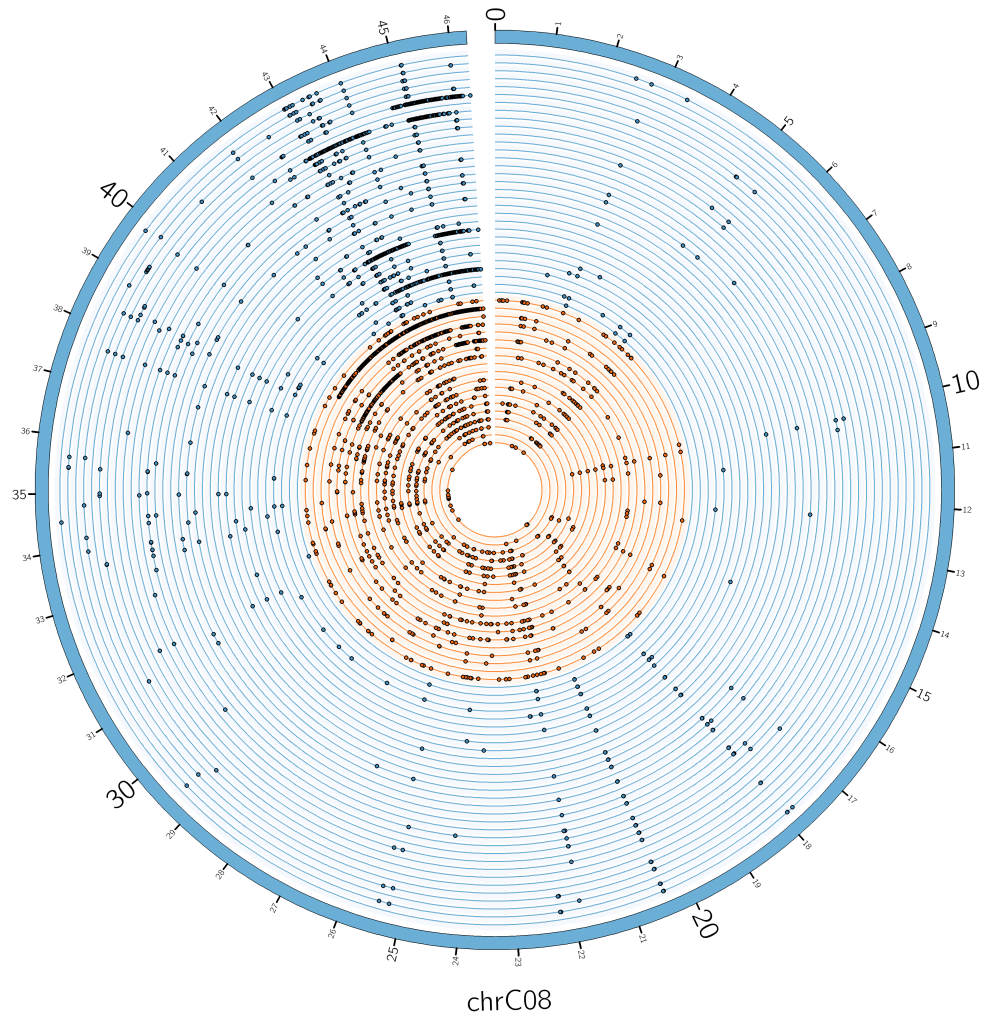



S

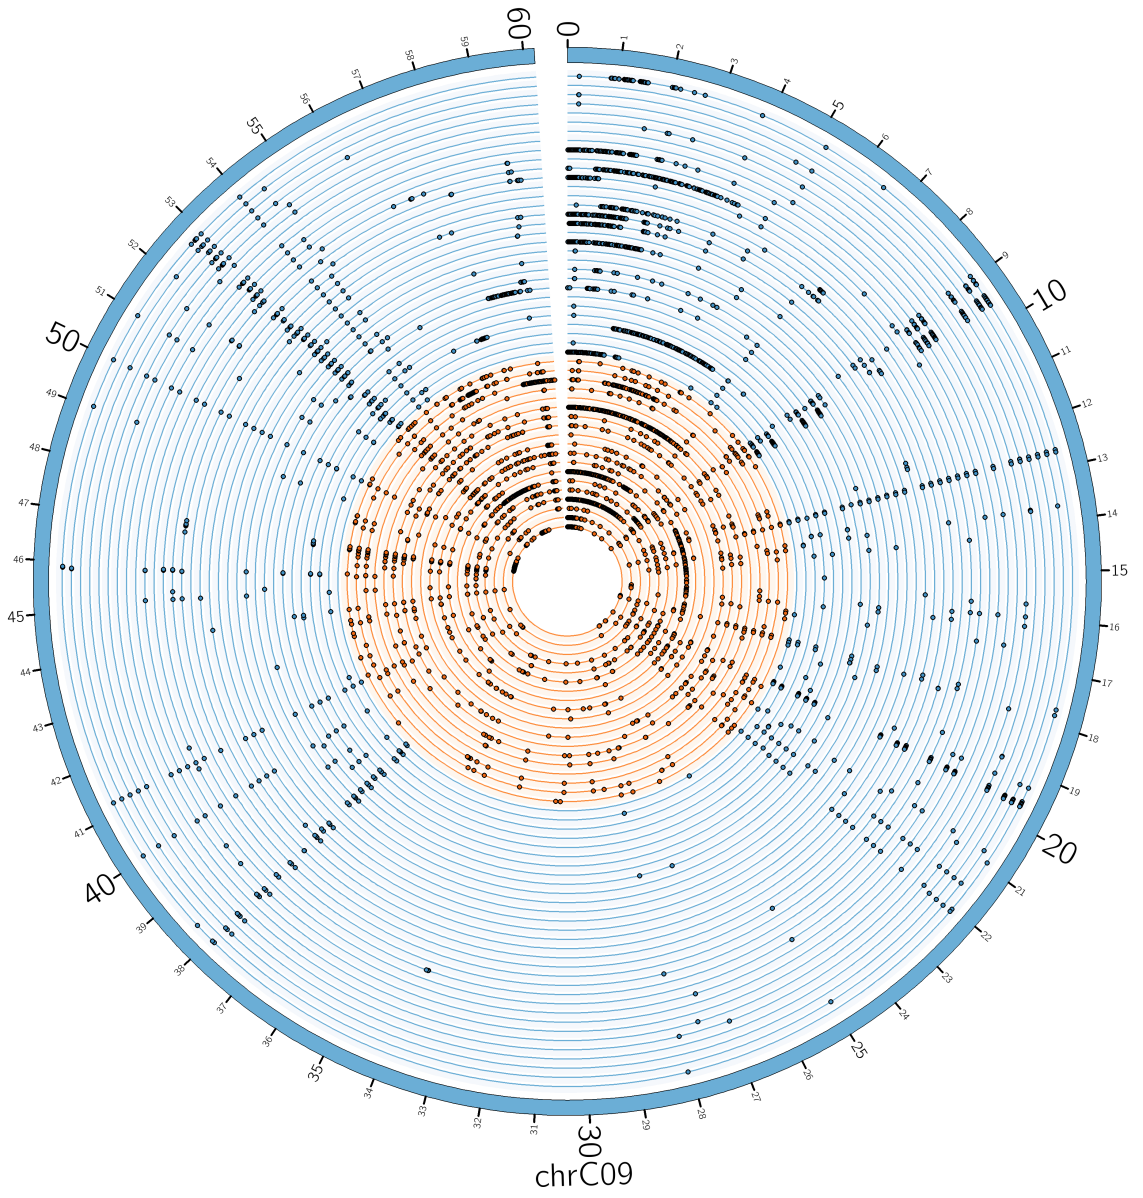

t

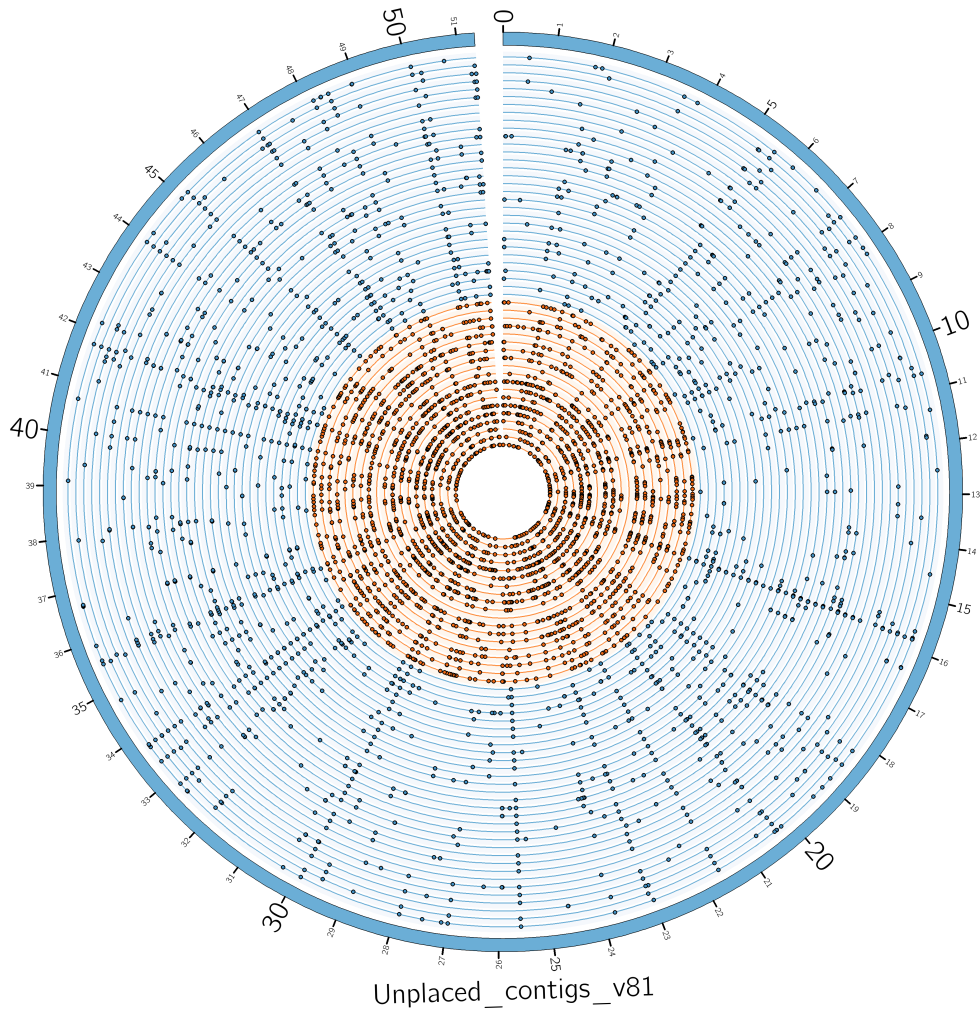

Supplementary Figure 1. Circos plots showing patterns of lost genes on the Darmor-*bzh* portion of the pangenome on the A genome (a-j), the C genome (k-s) and unplaced contigs (t). The dots represent lost genes in the non-synthetics (blue) and synthetics (orange) The order in which the accessions appear on the plots as indicated by the blue and orange rings is listed in Supplementary Table 19.

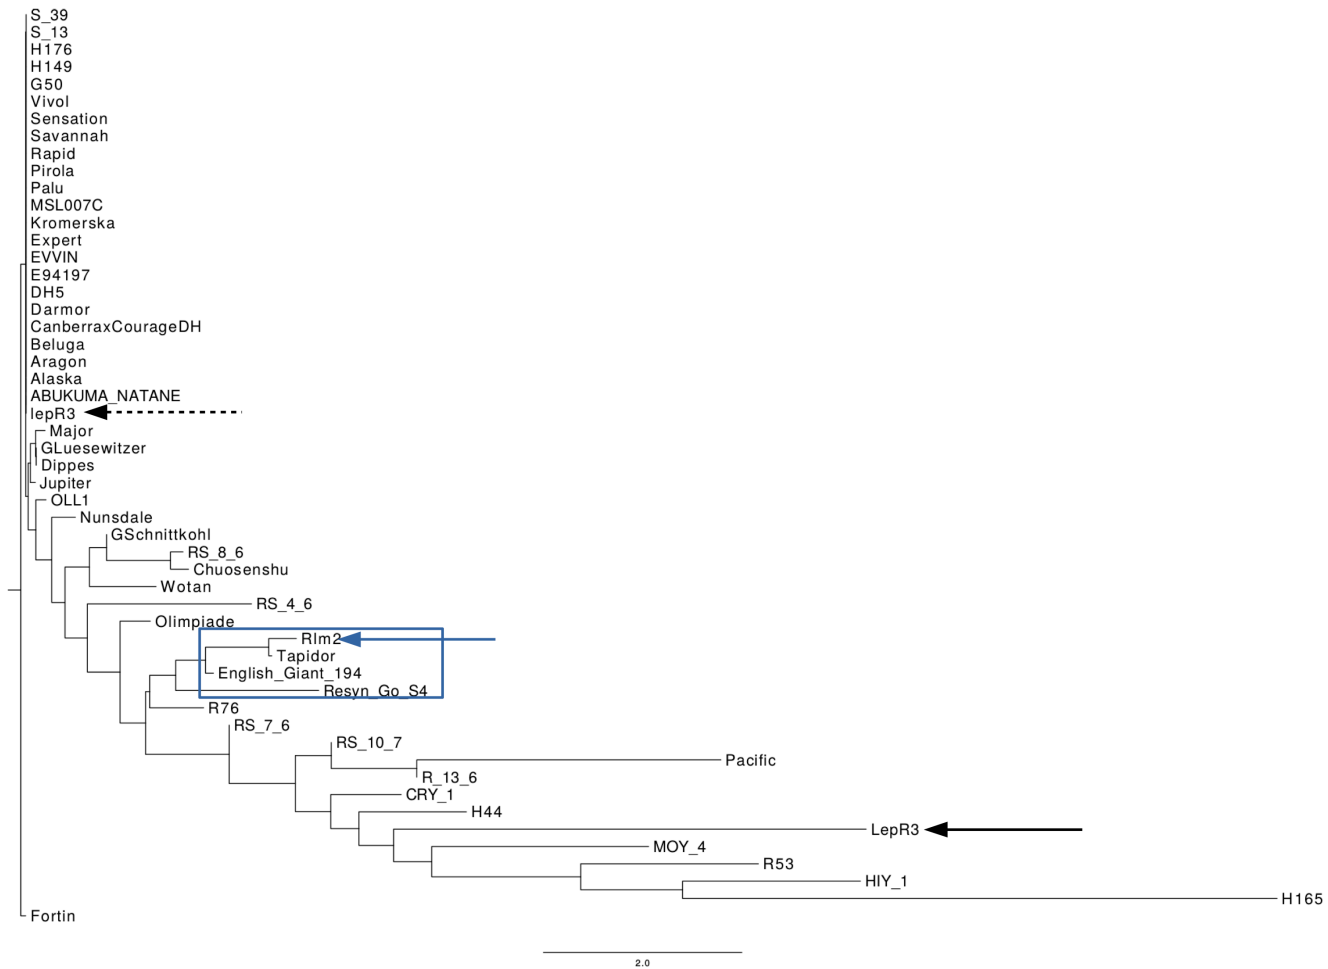

Supplementary Figure 2. Phylogenetic relationship of the allelic variants of the blackleg gene. The Neighbour Joining (NJ) tree was generated using the percentage identities of the amino acid sequences of the candidate blackleg genes in the non-synthetic and synthetic accessions. The coloured arrows point to the allelic variants (resistant and susceptible) of the genes: *lepR3/rIm2* (dashed black), *RIm2* (blue) and *LepR3* (black).

**a**

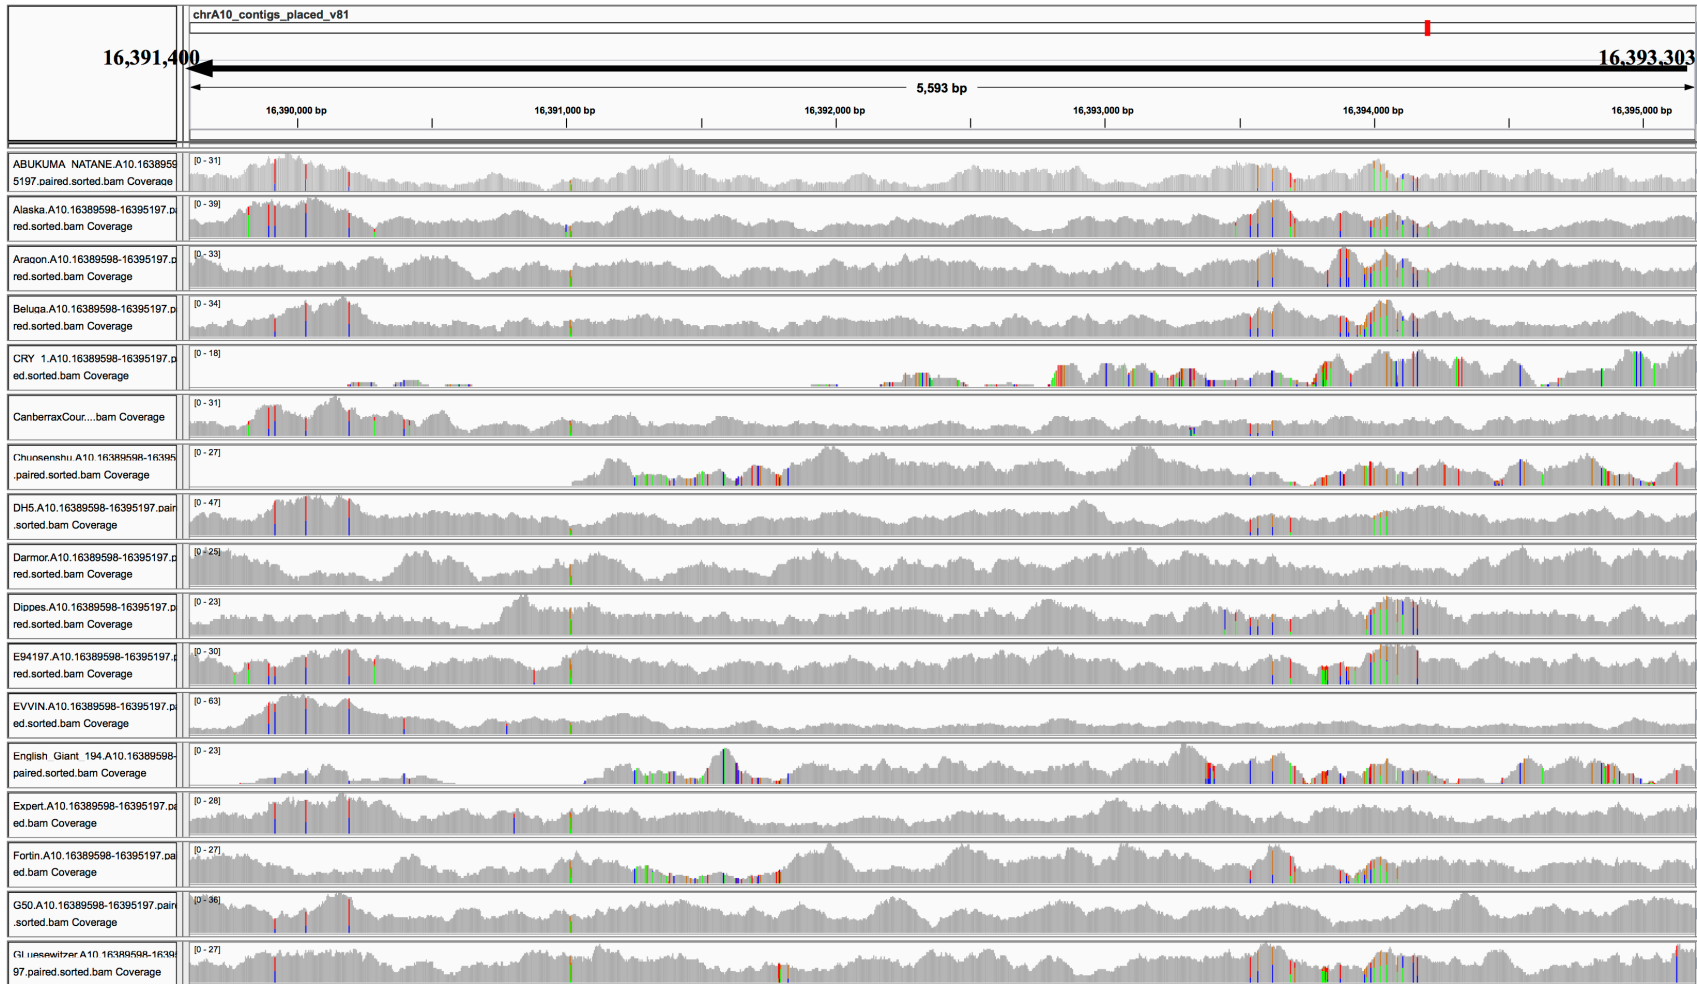



**b**

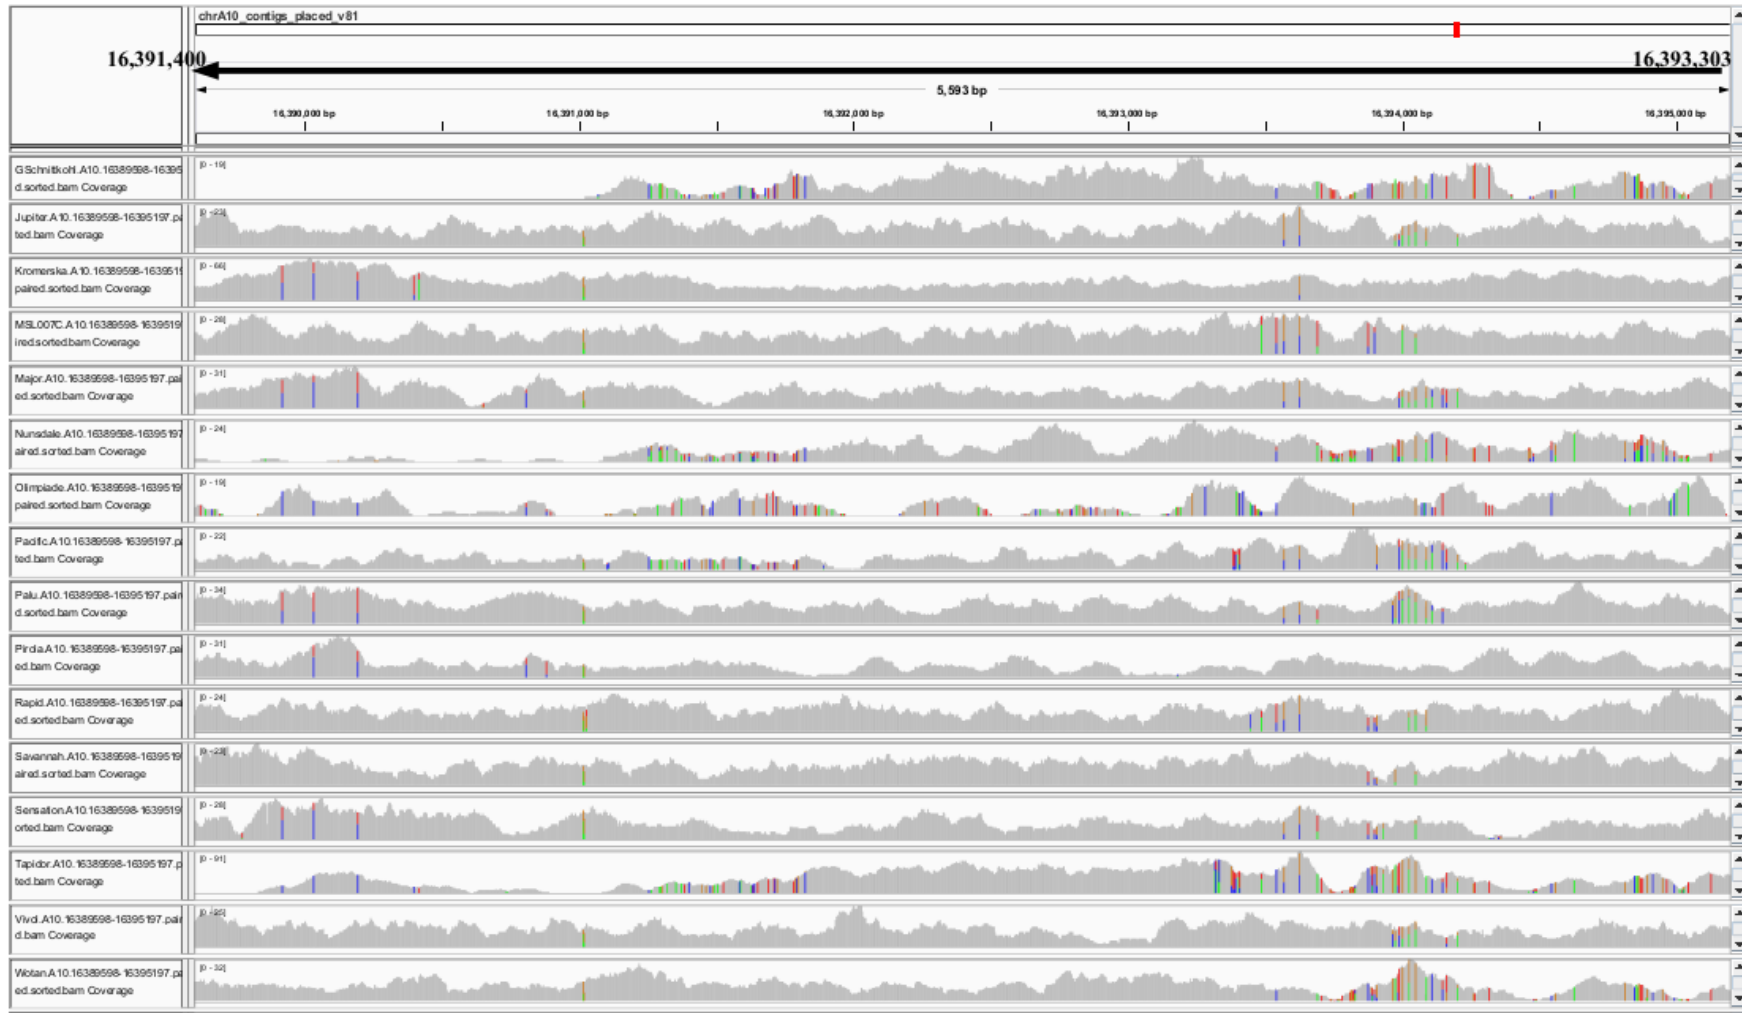

c

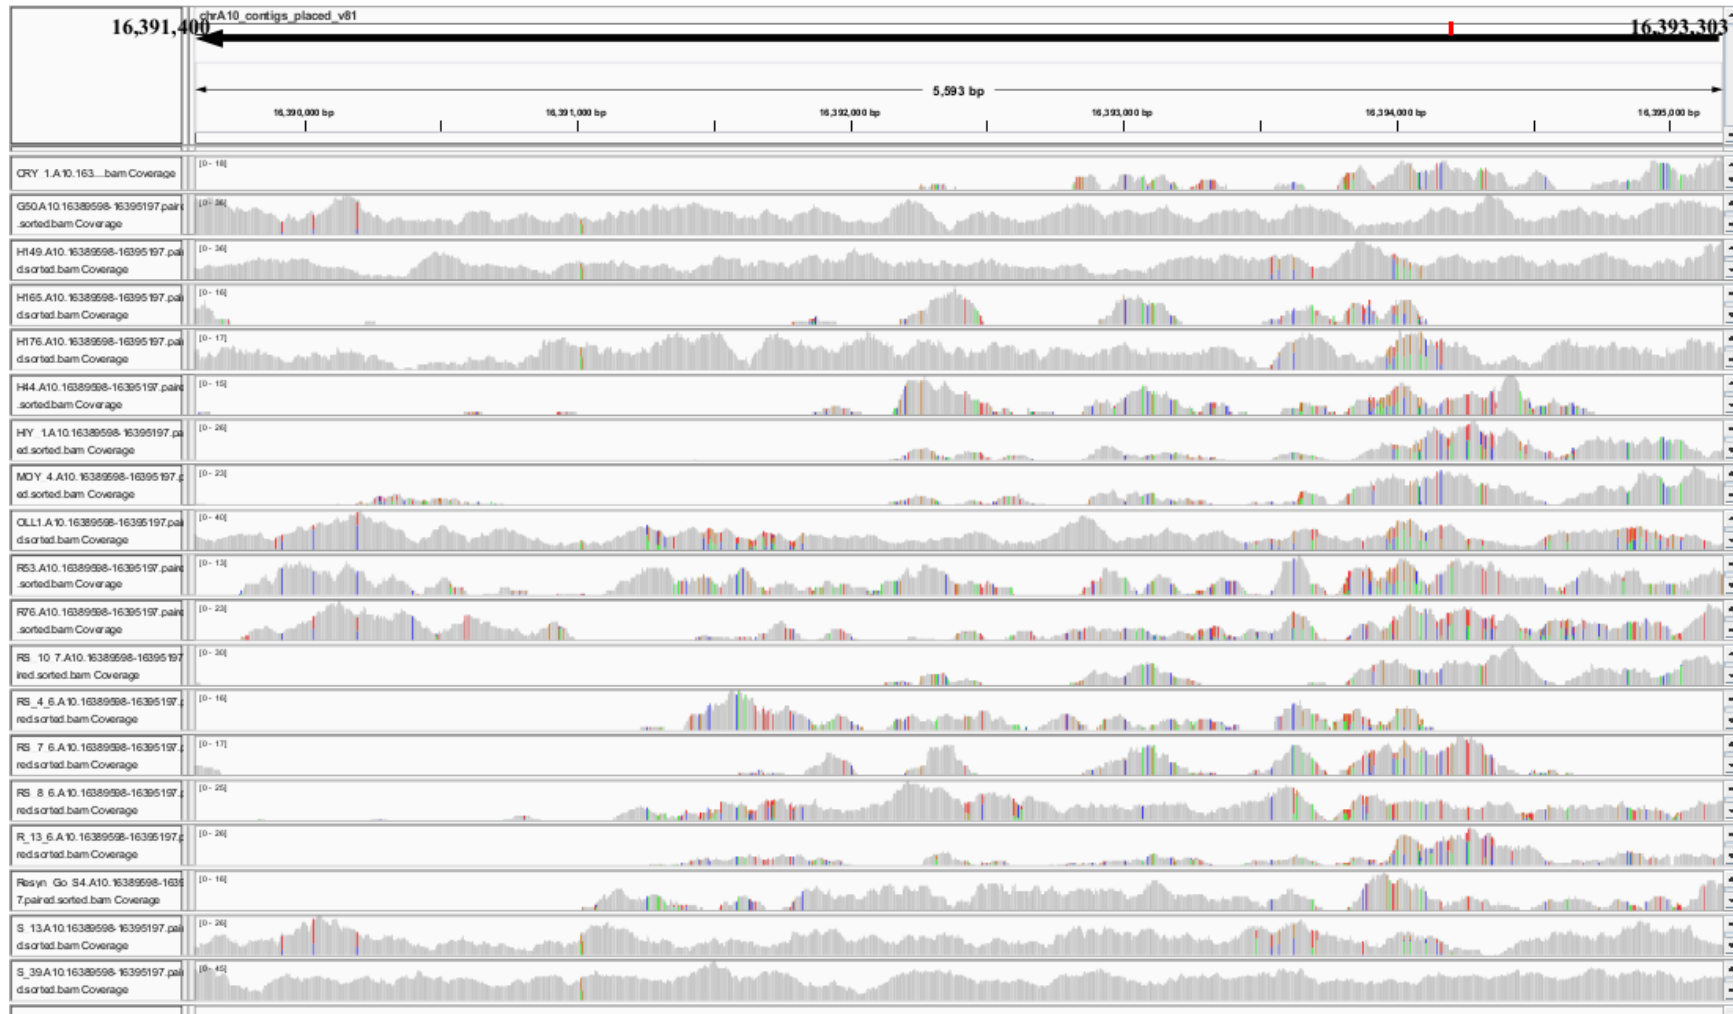

Supplementary Figure 3. Read mapping coverage in region harbouring *lepR3/rlm2* on chromosome A10 of the pangenome for the non-synthetics (a and b) and synthetics (c). The blackleg resistance gene alleles *Rlm2* and *LepR3* were not among the genes predicted in this study. However, when comparing the sequence of the susceptible allele (*lepR3/rlm2*) of the blackleg gene with the pangenome assembly, we found that it was present and occupied its expected region of 16,391,400 bp to 16,393,303 bp on chromosome A10. The sequence of the cloned gene (*lepR3*) from Darmor-*bzh* v4.0 (BnaA10g20720D) was used to delimit the exact location of the gene in the pangenome assembly (the black arrow indicates the orientation of BnaA10g20720D and where it aligns in the pangenome) as *lepR3/rlm2* was not annotated in this version of the assembly presumably due to the strict repeat masking employed during the gene annotation process to avoid the calling of false PAVs. According to read mapping coverage in the target region across all the accessions used in this study, this region was identified as being part of the core genome, but lower read mapping coverage was observed with respect to the non-synthetics suggesting that *lepR3/rlm2* may have diverged in these accessions, reflecting their diverse origins.

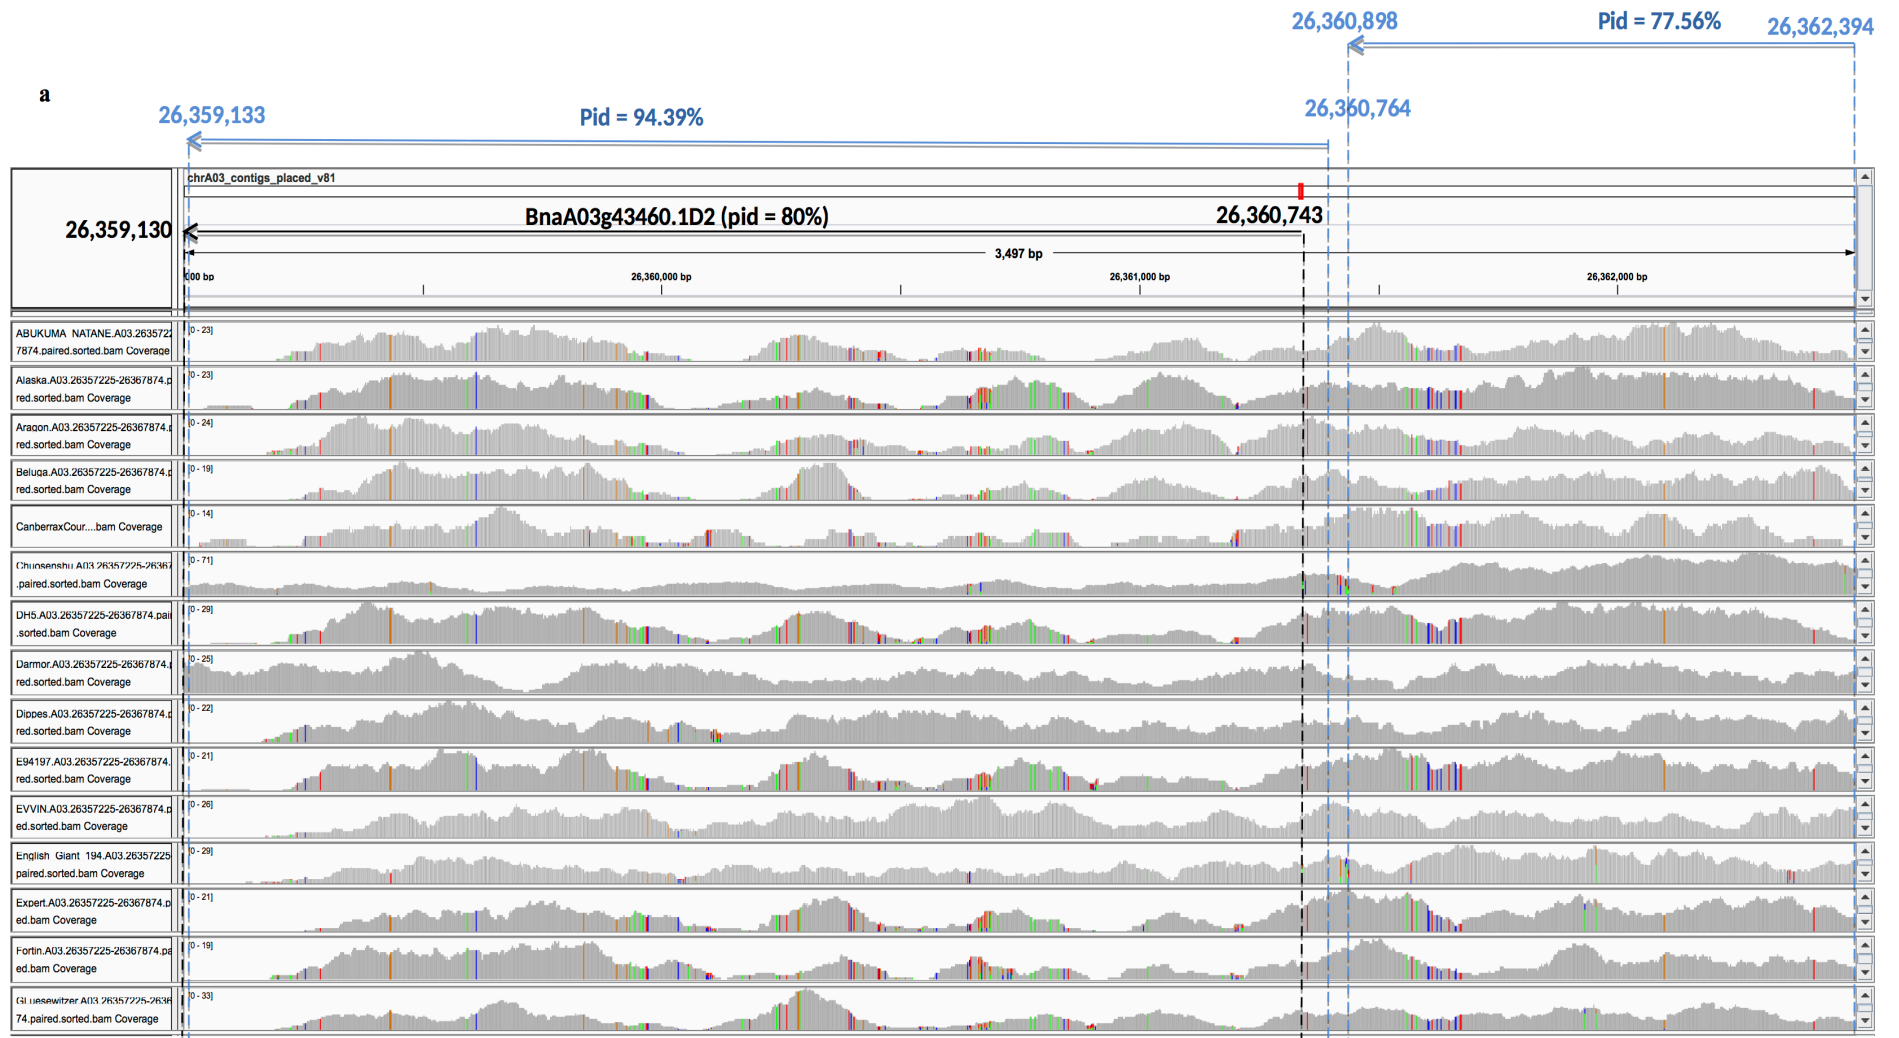



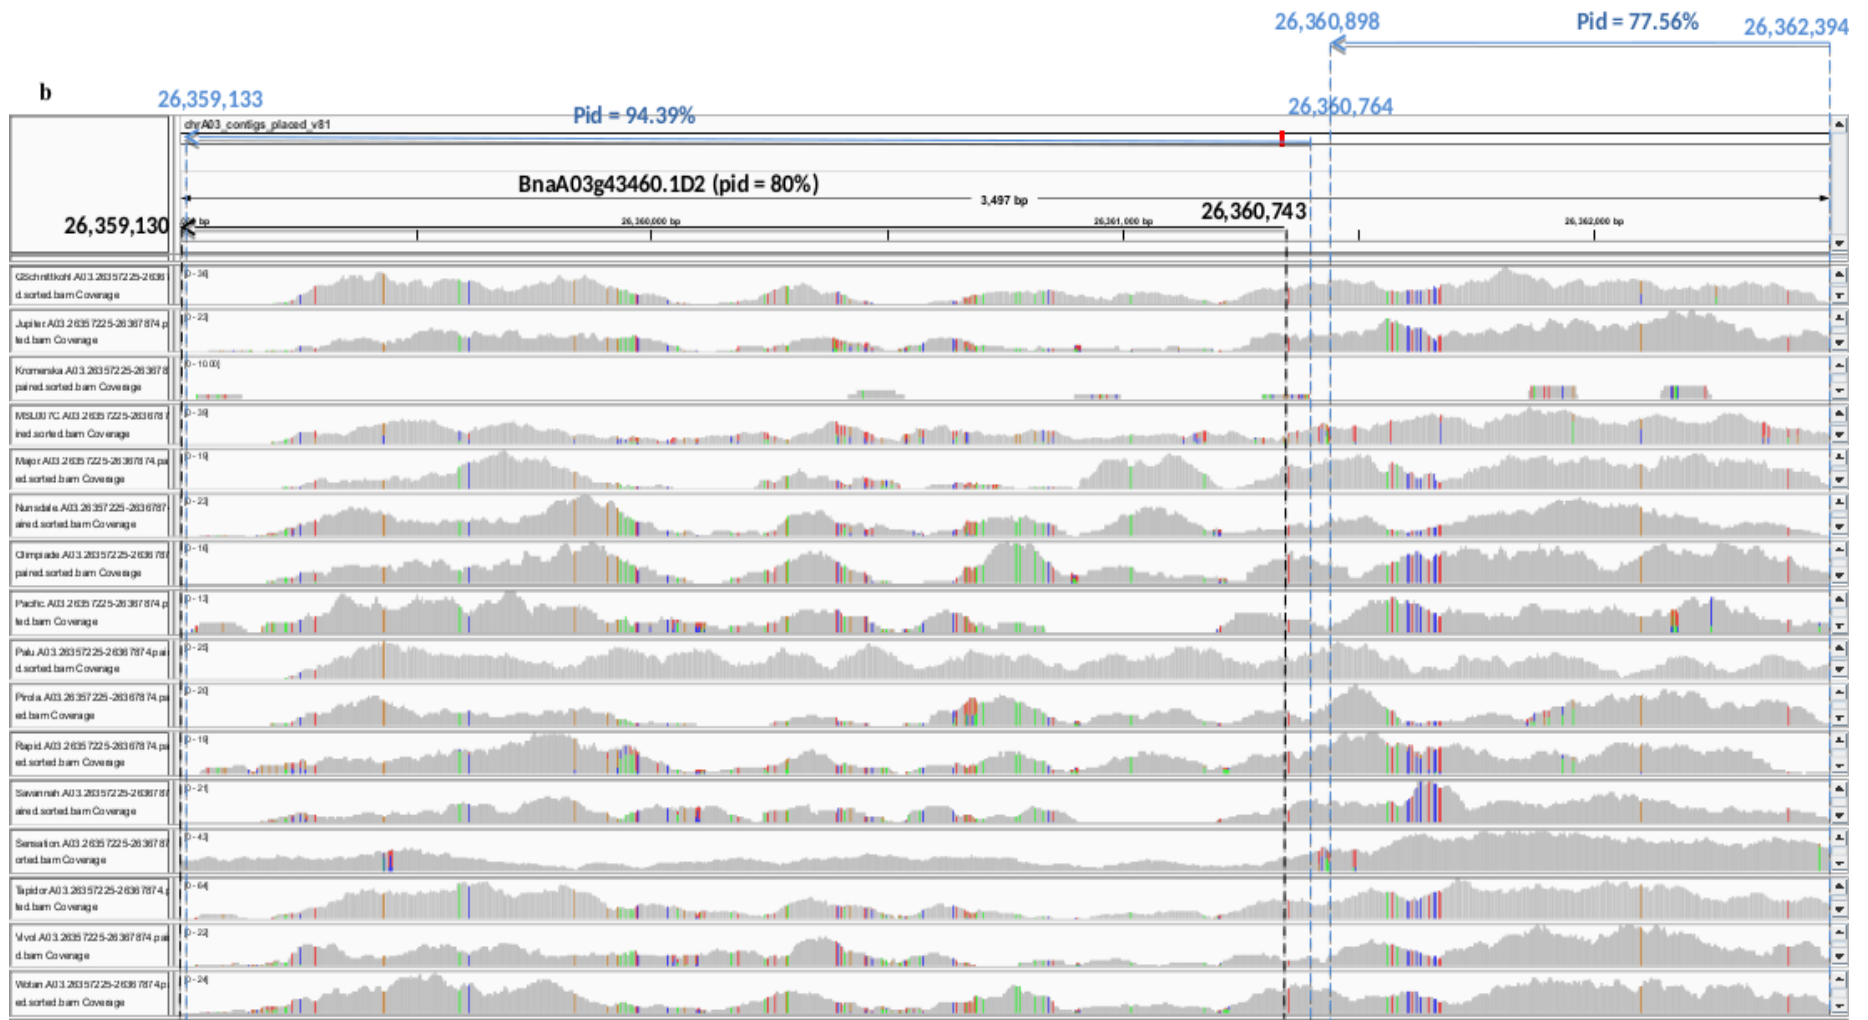

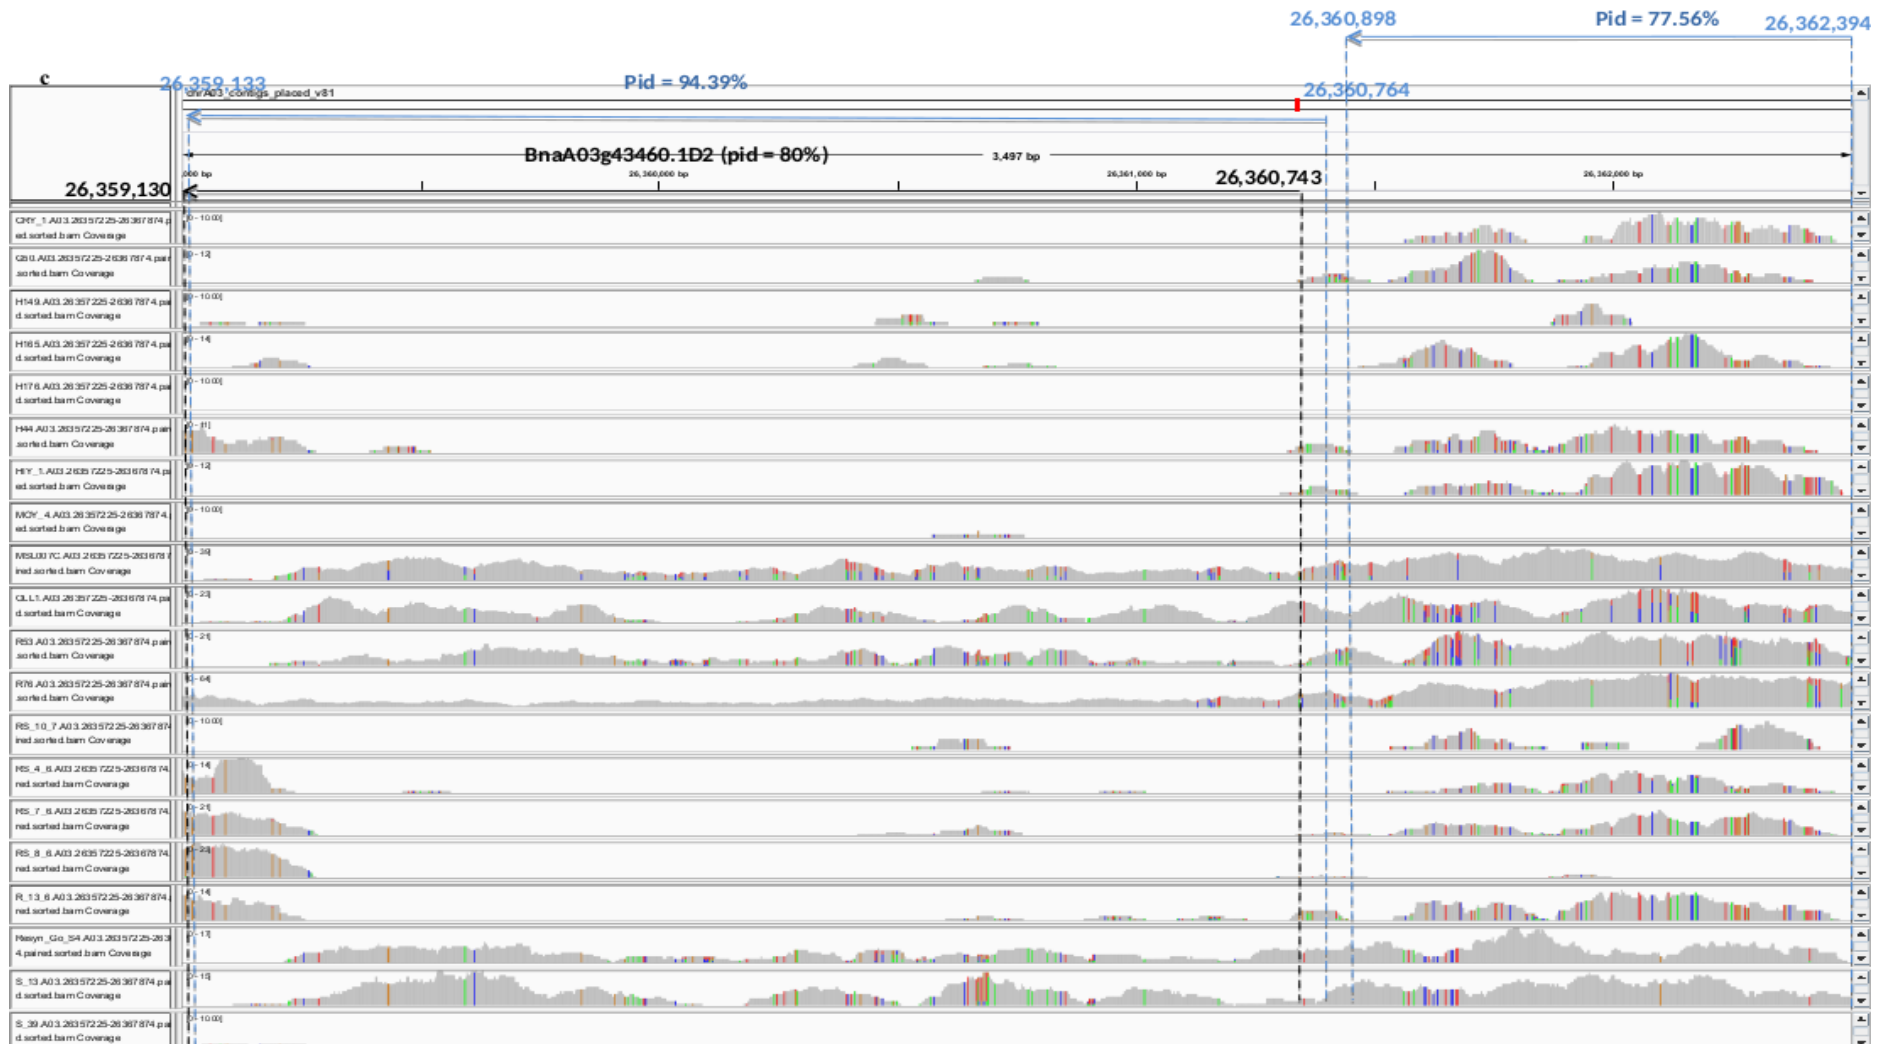

Supplementary Figure 4. Read mapping coverage in the region harbouring BnaA03g43460.1D2, which was identified as the potential candidate ortholog of the *B. rapa* gene, *CRa* on chromosome A03 of the pangenome in (a and b) non-synthetics and (c) synthetics. The black arrow indicates the position of BnaA03g43460.1D2, which was identified as a variable gene. The observations that BnaA03g43460.1D2 contained one exon while the *B. rapa* *CRa* gene contained four, and that BnaA03g43460.1D2 was missing two out of the three predicted domains of *CRa* could be due to an assembly artefact. Therefore, to determine whether BnaA03g43460.1D2 was truly variable, the CDS sequence of *CRa* was aligned to the reference using BLAST (the blue arrows delimit the positions of where the CDS sequence aligns) and read mapping coverage was inspected in the target region. The results from both steps concurred, confirming that BnaA03g43460.1D2, together with its flanking regions was variable. Lower read mapping coverage was observed in the synthetics compared to the non-synthetics suggesting that BnaA03g43460.1D2 may be highly diverged in the synthetic accessions. BnaA03g43460.1D2 was identified as being absent in the following accessions based on gene PAV results: CRY\_1, G50, H176, HIY\_1, MOY\_4 and S\_39.

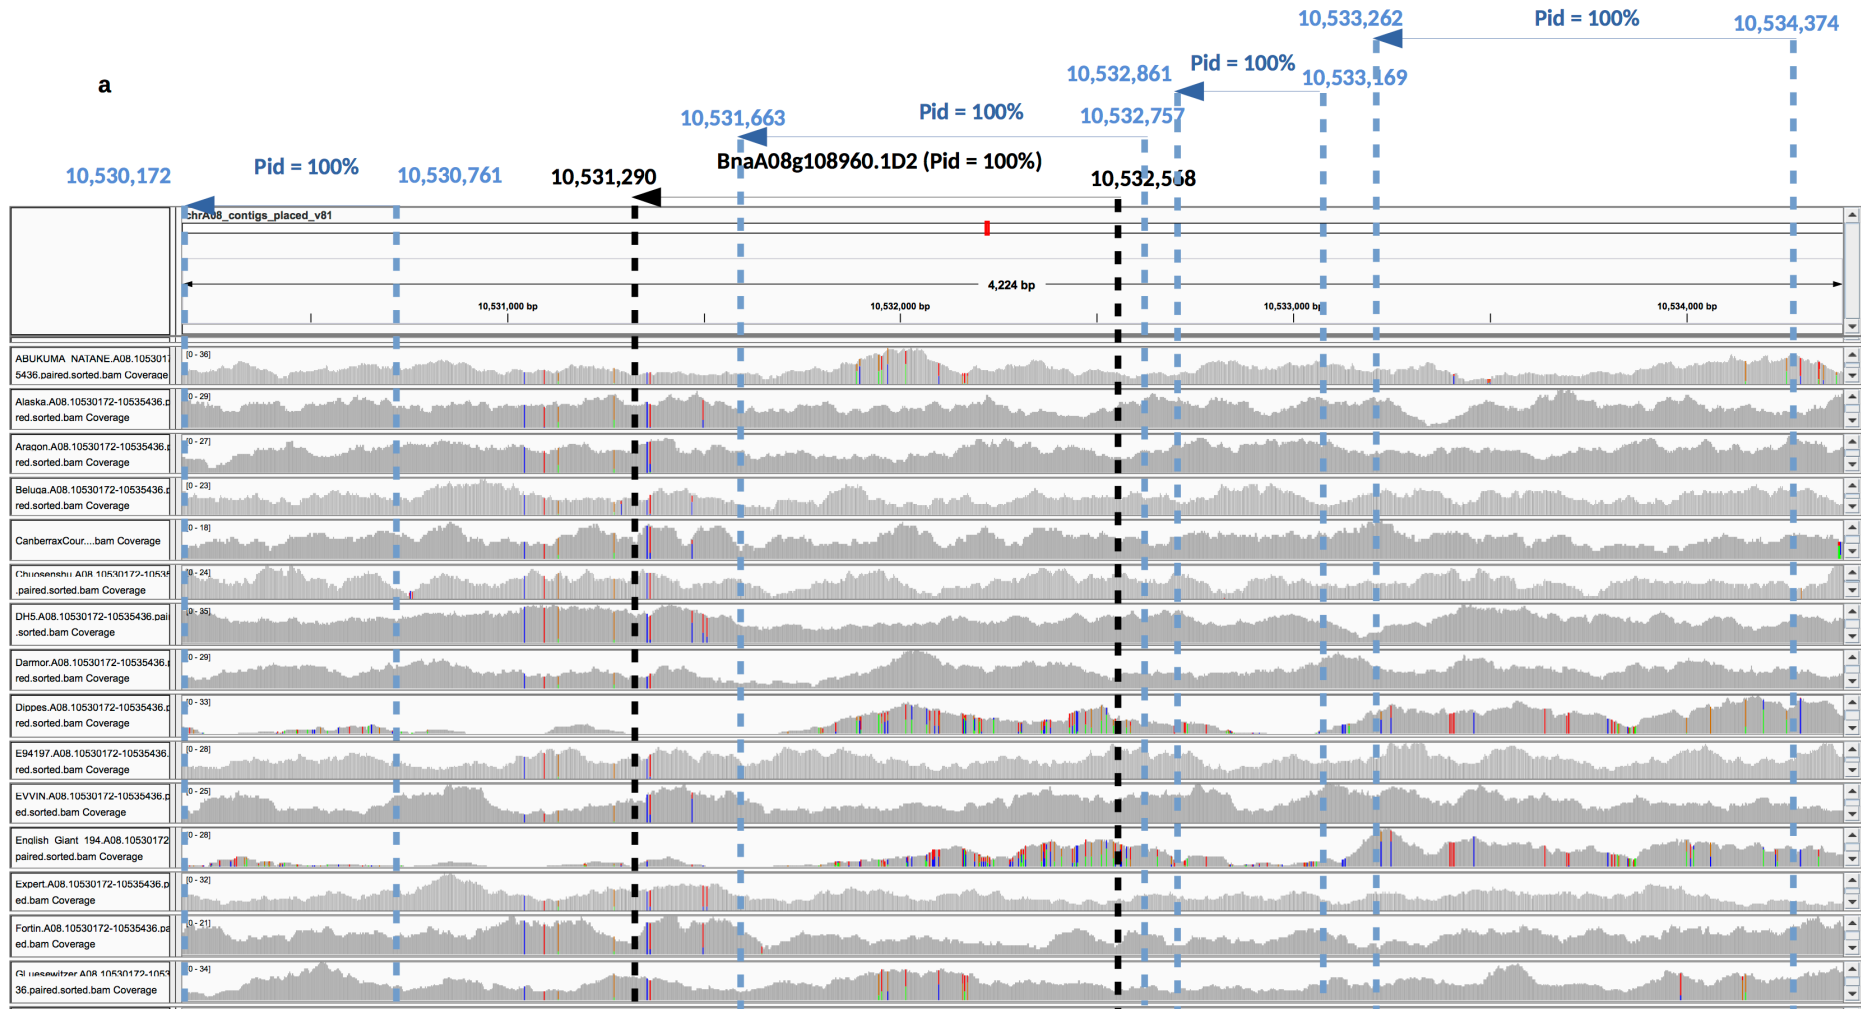



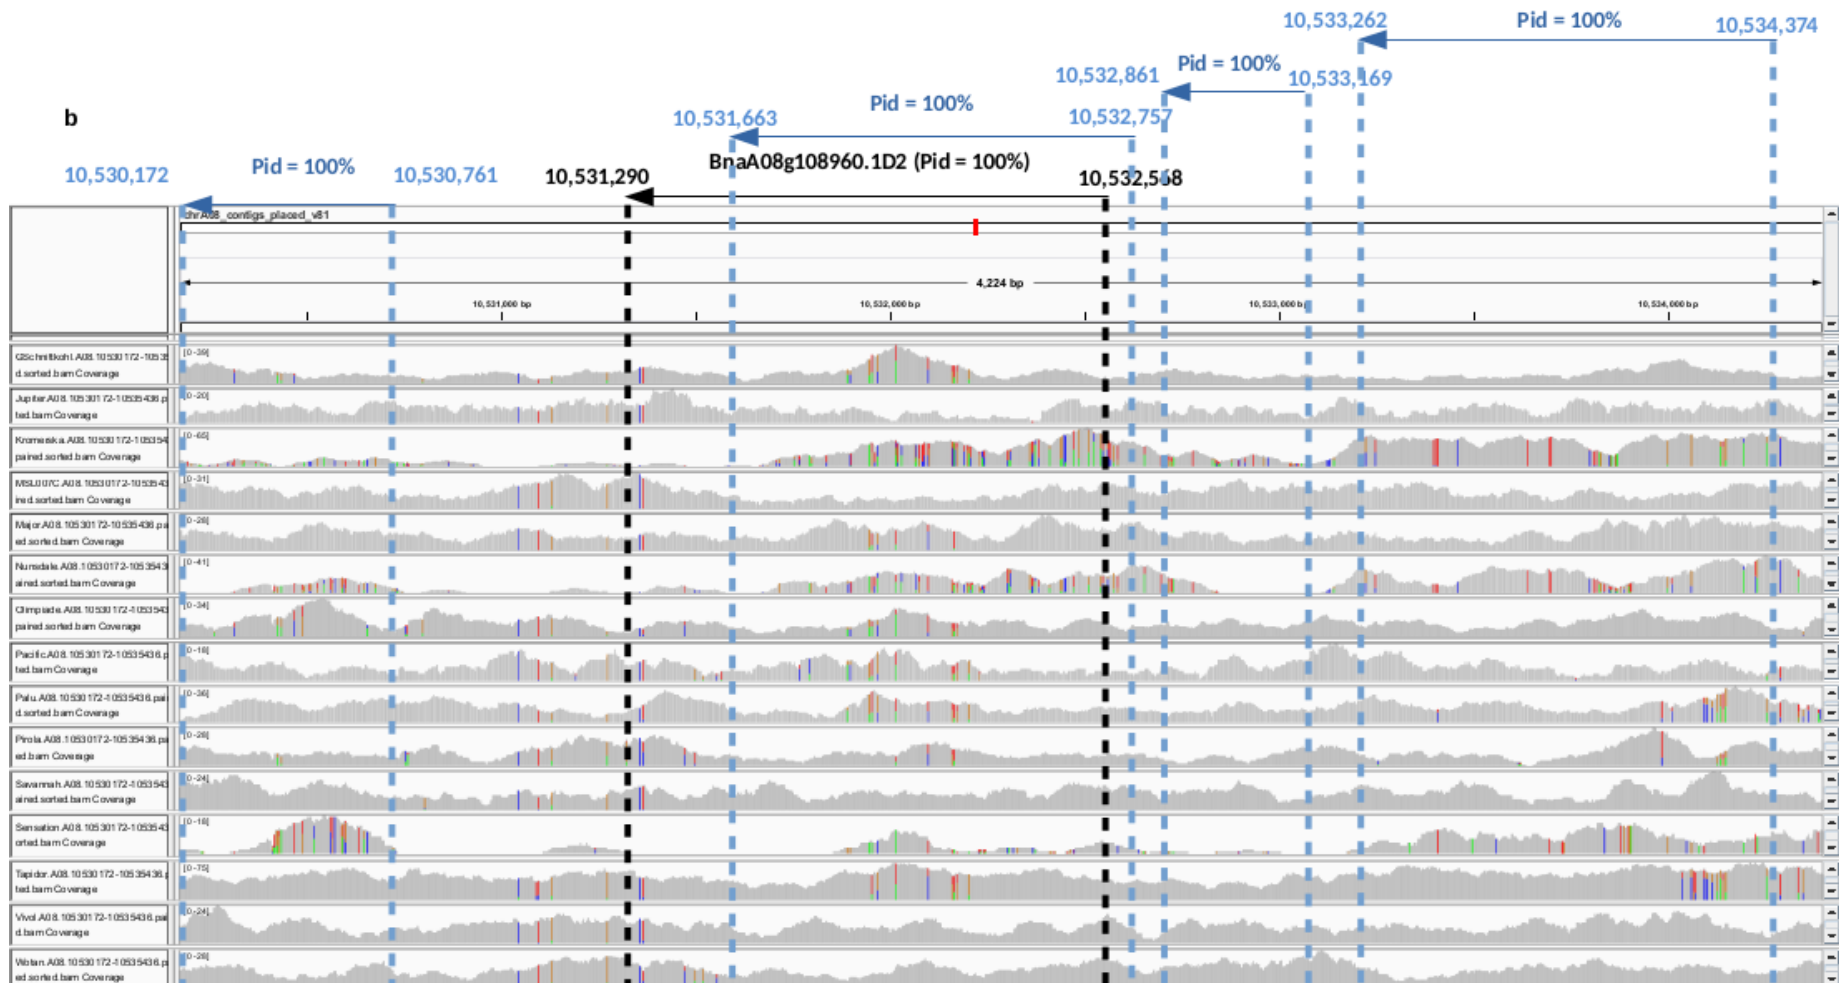

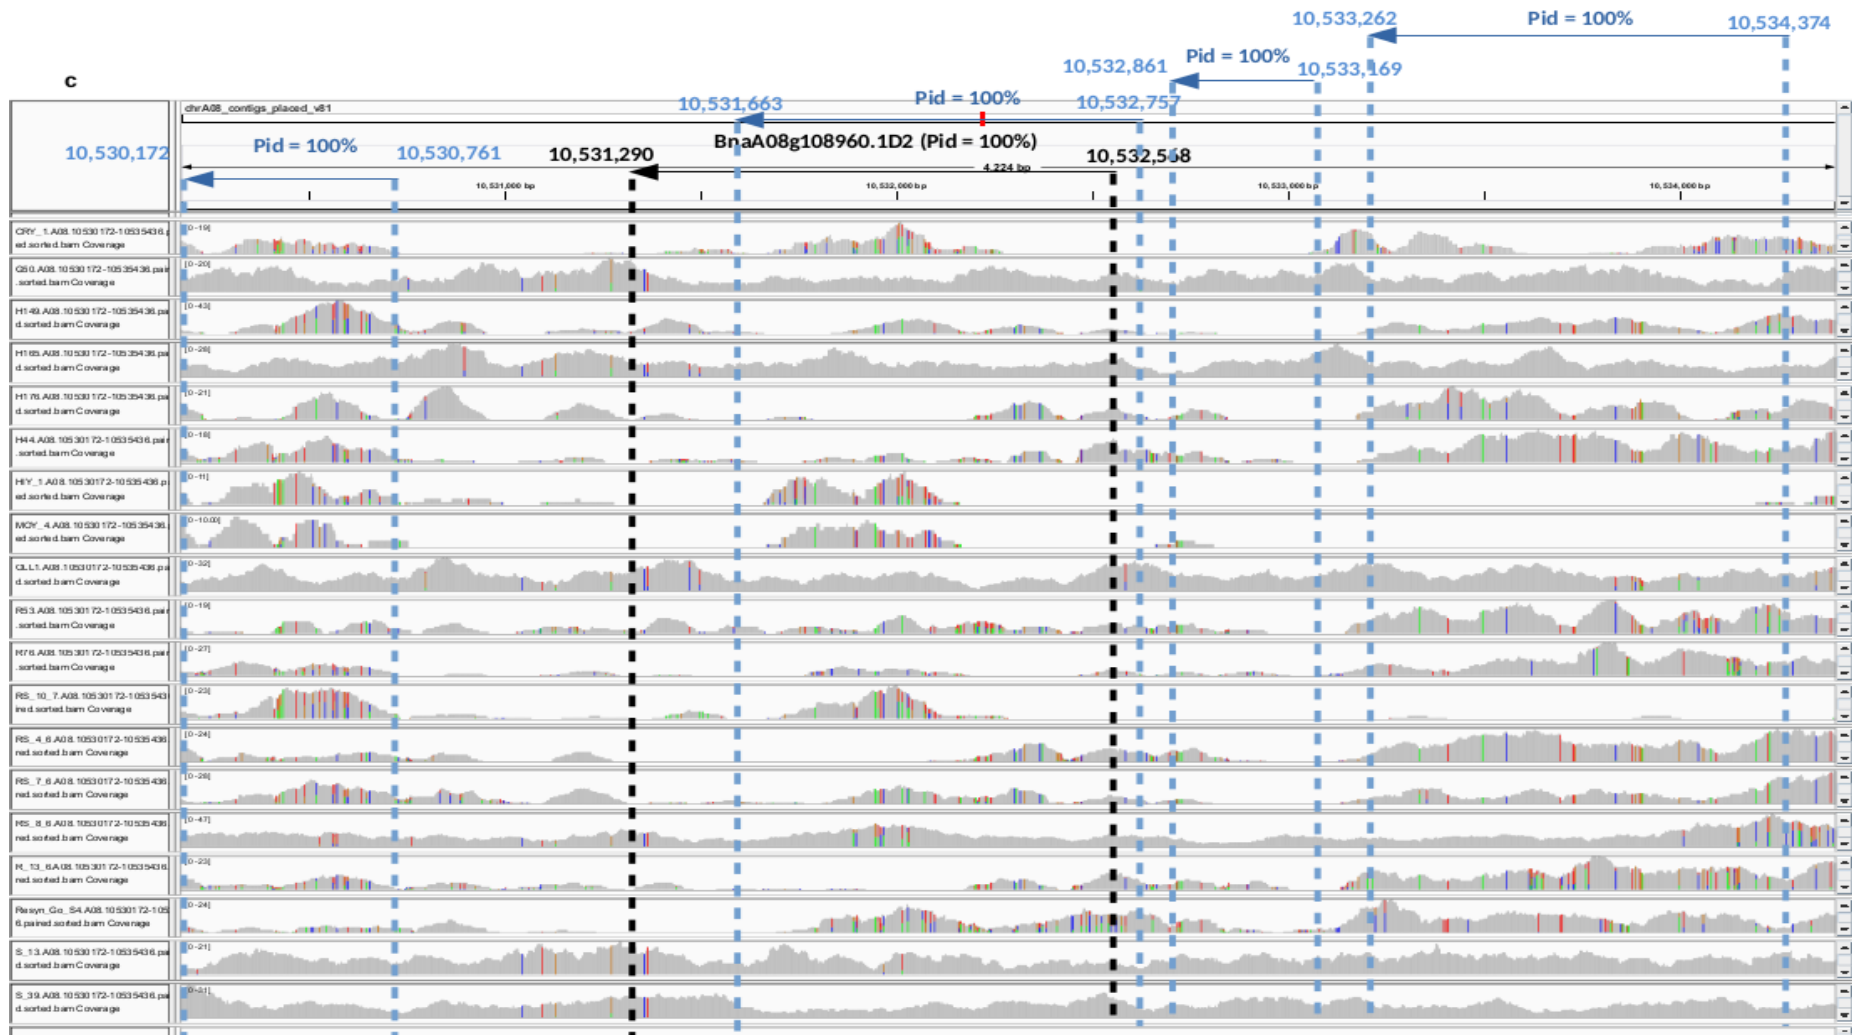

Supplementary Figure 5. Read mapping coverage in the region harbouring BnA08g08960.1D2, which was identified as the potential candidate ortholog of the *B. rapa* gene, *crr1a* on chromosome A08 of the pangenome in (a and b) non-synthetics and (c) synthetics. The black arrow indicates the position of BnA08g08960.1D2, which was identified as a core gene. The observations that BnA08g08960.1D2 contained one exon while the *B. rapa crr1a* gene contained four, and that BnA08g08960.1D2 was missing two out of the four predicted domains of *crr1a* could be due to an assembly artefact. Therefore, to determine whether BnA08g08960.1D2 was truly variable, the CDS sequence of *crr1a* was aligned to the reference using BLAST (the blue arrows delimit the positions of where the CDS sequence aligns) and read mapping coverage was inspected in the target region. The results from both steps concurred, confirming that BnA08g08960.1D2, together with its flanking regions was core. Lower read mapping coverage was observed in the synthetics compared to the non-synthetics suggesting that BnA08g08960.1D2 may be diverged in the synthetic accessions.

It has been suggested that the genes for clubroot resistance in *B. napus* are located on the A genome<sup>1</sup>, and clubroot resistance has been introgressed into *B. napus* from European fodder turnip<sup>1,2</sup>. However, the presence of the candidate orthologs of the clubroot resistance genes (*CRa* and *crr1a*) in the synthetics suggests that other sources of clubroot resistance may exist. The PAV behaviour of the clubroot orthologs is also consistent with that observed in Chinese cabbage<sup>3</sup> where gene presence and absence has been linked to resistance in a dosage-dependent manner, with some varieties exhibited partial resistance.

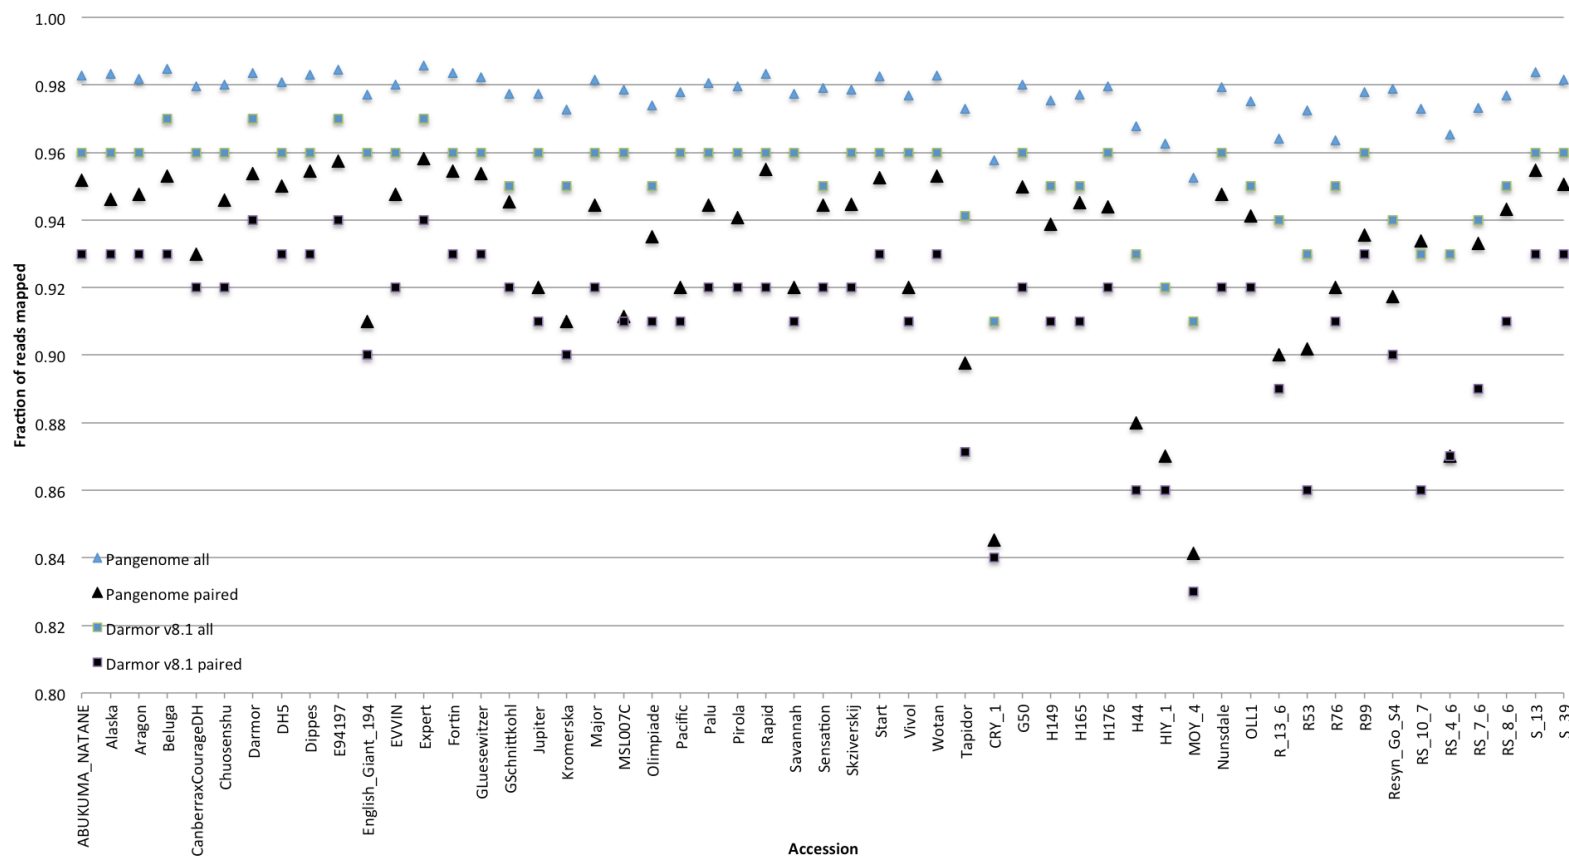

Supplementary Figure 6. For each of the accessions, the percentage of reads mapping to the Darmor-*bzh* v8.1 portion of the pangenome only and the entire pangenome was calculated. The results suggest that the newly assembled contigs provide mapping space for the previously unmapped reads. Reads mapping to mitochondrial, chloroplast and contamination sequences were excluded from the count.



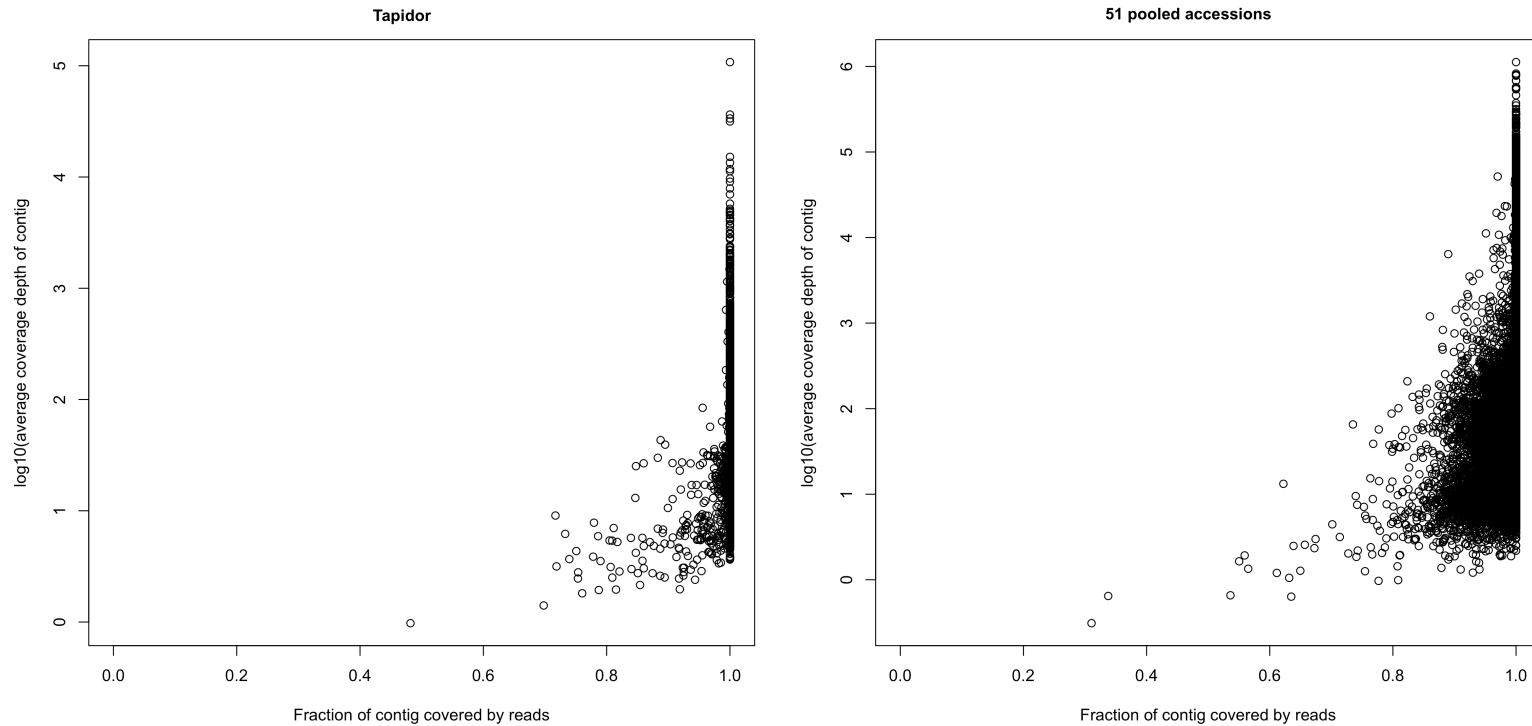

Supplementary Figure 7. Summary of coverage statistics when mapping reads from a given accession to the contigs contributed by this accession to the pangenome during iterative mapping and assembly. In this case, the Tapidor reads were mapped back to the newly assembled contigs stemming from the pangenome assembly. Similarly, reads from the 51 low coverage accessions were mapped to the contigs that originate from the assembly of their pooled unmapped reads. In both cases, the horizontal coverage, i.e., the fraction of contig that is covered by sequencing reads and the vertical coverage, i.e., the average coverage of reads mapped to the contig, were calculated for all the contigs.

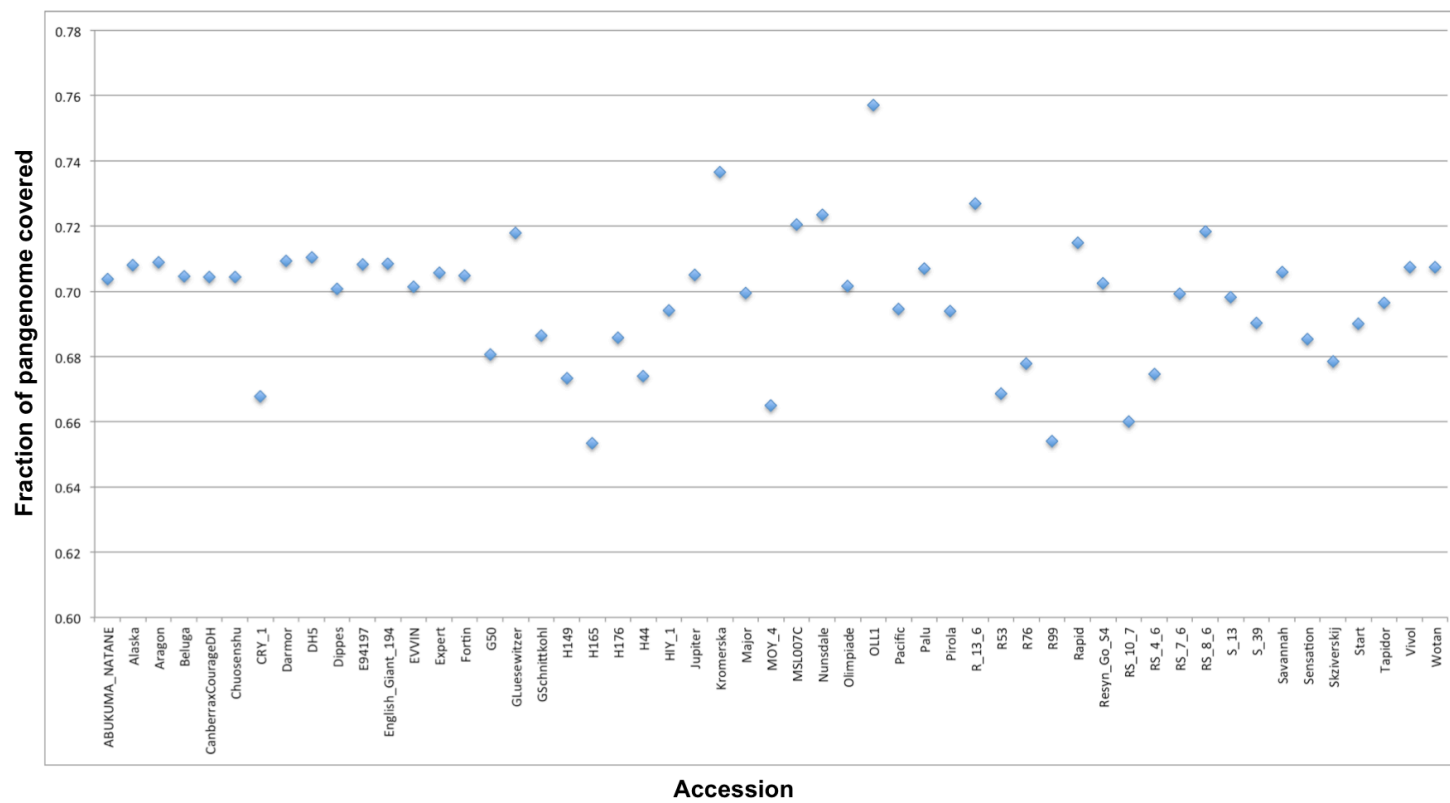

Supplementary Figure 8. The fraction of the pangenome which had reads mapping (coverage  $\geq 1$ ) for each of the accessions.
