# Supplementary material
Source: PubMed Central journal article supplement (PMC11629803)
Supplement: PBI-16-1265-s005.pdf [file PBI-16-1265-s005.pdf]

**Supplementary File 2: Results of the HE analysis across the Darmor-*bzh* portion of the pangenome.**  
**‘Total no. of lost genes’ refers to the number of HE-related and non-HE-related PAV genes in the donor region on chromosome (Xn).**

| <b>Accession</b>   | <b>Direction of HE (Xn to Yn)</b> | <b>Total no. of lost genes on chromosome Xn</b> | <b>No. of HE-PAVs on chromosome Yn</b> |
|--------------------|-----------------------------------|-------------------------------------------------|----------------------------------------|
| H165               | A01 to C01                        | 637                                             | 277                                    |
| RS_10_7            | A01 to C01                        | 487                                             | 178                                    |
| RS_4_6             | A01 to C01                        | 1037                                            | 481                                    |
| CRY_1              | A02 to C02                        | 527                                             | 182                                    |
| H165               | A02 to C02                        | 41                                              | 2                                      |
| S_39               | A02 to C02                        | 513                                             | 233                                    |
| RS_10_7            | A02 to C02                        | 549                                             | 206                                    |
| H165               | A04 to C04                        | 296                                             | 123                                    |
| R76                | A07 to C06                        | 192                                             | 84                                     |
| RS_4_6             | A07 to C06                        | 209                                             | 82                                     |
| H149               | A09 to C08                        | 597                                             | 208                                    |
| S_39               | A09 to C08                        | 319                                             | 110                                    |
| Sensation          | A09 to C09                        | 336                                             | 81                                     |
| Nunsdale           | A09 to C09                        | 131                                             | 47                                     |
| G50                | A09 to C09                        | 354                                             | 144                                    |
| H176               | A09 to C09                        | 242                                             | 66                                     |
| R53                | A09 to C09                        | 300                                             | 77                                     |
| Expert             | A10 to C09                        | 74                                              | 7                                      |
| S_39               | A10 to C09                        | 284                                             | 94                                     |
| Chuosenshu         | C01 to A01                        | 564                                             | 251                                    |
| Gruner Schnittkohl | C01 to A01                        | 696                                             | 280                                    |
| Sensation          | C01 to A01                        | 247                                             | 79                                     |
| CRY_1              | C01 to A01                        | 794                                             | 233                                    |
| G50                | C01 to A01                        | 333                                             | 131                                    |
| S_39               | C01 to A01                        | 296                                             | 115                                    |
| Major              | C01 to A01                        | 280                                             | 79                                     |
| H165               | C01 to A01                        | 250                                             | 64                                     |
| G50                | C02 to A02                        | 432                                             | 113                                    |
| Tapidor            | C02 to A02                        | 482                                             | 129                                    |
| H165               | C02 to A02                        | 1272                                            | 446                                    |
| H176               | C02 to A02                        | 273                                             | 85                                     |
| R53                | C02 to A02                        | 1609                                            | 618                                    |
| R76                | C02 to A02                        | 280                                             | 30                                     |
| RS_10_7            | C02 to A02                        | 504                                             | 121                                    |
| Abukuma Nantane    | C03 to A03                        | 527                                             | 223                                    |
| Evvin              | C03 to A03                        | 303                                             | 86                                     |
| Expert             | C03 to A03                        | 244                                             | 89                                     |
| H149               | C03 to A03                        | 272                                             | 93                                     |
| H44                | C03 to A03                        | 287                                             | 61                                     |
| Pirola             | C03 to A03                        | 486                                             | 192                                    |
| RS_4_6             | C03 to A03                        | 605                                             | 47                                     |
| Sensation          | C03 to A03                        | 465                                             | 157                                    |
| Tapidor            | C03 to A03                        | 272                                             | 72                                     |
| Gruner Schnittkohl | C04 to A04                        | 338                                             | 120                                    |
| CRY_1              | C04 to A04                        | 288                                             | 64                                     |

|                    |            |     |     |
|--------------------|------------|-----|-----|
| Gruner Schnittkohl | C04 to A05 | 338 | 14  |
| CRY_1              | C04 to A05 | 288 | 5   |
| Gruner Schnittkohl | C05 to A05 | 419 | 204 |
| R53                | C05 to A05 | 466 | 192 |
| RS_10_7            | C05 to A05 | 282 | 87  |
| H149               | C06 to A07 | 194 | 64  |
| RS_7_6             | C06 to A07 | 140 | 30  |
| Chuosenhu          | C08 to A09 | 195 | 80  |
| DH5                | C08 to A09 | 248 | 105 |
| Pacific            | C08 to A09 | 289 | 126 |
| Sensation          | C08 to A09 | 221 | 88  |
| G50                | C08 to A09 | 659 | 337 |
| H165               | C08 to A09 | 195 | 50  |
| H44                | C08 to A09 | 297 | 118 |
| Dippes             | C09 to A09 | 186 | 62  |
| EVVIN              | C09 to A09 | 83  | 20  |
| Gross Luesewitzer  | C09 to A09 | 103 | 29  |
| Gruner Schnittkohl | C09 to A09 | 159 | 54  |
| Jupiter            | C09 to A09 | 155 | 51  |
| Major              | C09 to A09 | 176 | 63  |
| Sensation          | C09 to A09 | 255 | 69  |
| Wotan              | C09 to A09 | 200 | 61  |
| H149               | C09 to A09 | 247 | 23  |
| H44                | C09 to A09 | 361 | 98  |
| Resyn_Go_S4        | C09 to A09 | 273 | 101 |
| RS_7_6             | C09 to A09 | 306 | 82  |
| English_Giant_194  | C09 to A09 | 234 | 96  |
| H149               | C09 to A10 | 247 | 39  |

#### List of HE genes (A01 to C01)

| Accession | Lost gene        | Duplicated HE gene |
|-----------|------------------|--------------------|
| H165      | BnaA01g00010.1D2 | BnaC01g00670.1D2   |
| H165      | BnaA01g00030.1D2 | BnaC01g00690.1D2   |
| H165      | BnaA01g00040.1D2 | BnaC01g00700.1D2   |
| H165      | BnaA01g00060.1D2 | BnaC01g00730.1D2   |
| H165      | BnaA01g00080.1D2 | BnaC01g00750.1D2   |
| H165      | BnaA01g00180.1D2 | BnaC01g00860.1D2   |
| H165      | BnaA01g00260.1D2 | BnaC01g00960.1D2   |
| H165      | BnaA01g00330.1D2 | BnaC01g01030.1D2   |
| H165      | BnaA01g00360.1D2 | BnaC01g01070.1D2   |
| H165      | BnaA01g00380.1D2 | BnaC01g01090.1D2   |
| H165      | BnaA01g00480.1D2 | BnaC01g01170.1D2   |
| H165      | BnaA01g00500.1D2 | BnaC01g01190.1D2   |
| H165      | BnaA01g00530.1D2 | BnaC01g01220.1D2   |
| H165      | BnaA01g00630.1D2 | BnaC01g01310.1D2   |
| H165      | BnaA01g00640.1D2 | BnaC01g01320.1D2   |
| H165      | BnaA01g00660.1D2 | BnaC01g01340.1D2   |
| H165      | BnaA01g00670.1D2 | BnaC01g01350.1D2   |
| H165      | BnaA01g00780.1D2 | BnaC01g01470.1D2   |
| H165      | BnaA01g00850.1D2 | BnaC01g01550.1D2   |
| H165      | BnaA01g00890.1D2 | BnaC01g01600.1D2   |

|      |                  |                  |
|------|------------------|------------------|
| H165 | BnaA01g00920.1D2 | BnaC01g01630.1D2 |
| H165 | BnaA01g00970.1D2 | BnaC01g01670.1D2 |
| H165 | BnaA01g01050.1D2 | BnaC01g01770.1D2 |
| H165 | BnaA01g01070.1D2 | BnaC01g01790.1D2 |
| H165 | BnaA01g01160.1D2 | BnaC01g01880.1D2 |
| H165 | BnaA01g01170.1D2 | BnaC01g01880.1D2 |
| H165 | BnaA01g01180.1D2 | BnaC01g01890.1D2 |
| H165 | BnaA01g01310.1D2 | BnaC01g02000.1D2 |
| H165 | BnaA01g01510.1D2 | BnaC01g02220.1D2 |
| H165 | BnaA01g01540.1D2 | BnaC01g02250.1D2 |
| H165 | BnaA01g01720.1D2 | BnaC01g02430.1D2 |
| H165 | BnaA01g01760.1D2 | BnaC01g02470.1D2 |
| H165 | BnaA01g01770.1D2 | BnaC01g02480.1D2 |
| H165 | BnaA01g01780.1D2 | BnaC01g02490.1D2 |
| H165 | BnaA01g01830.1D2 | BnaC01g02540.1D2 |
| H165 | BnaA01g01890.1D2 | BnaC01g02600.1D2 |
| H165 | BnaA01g01900.1D2 | BnaC01g02600.1D2 |
| H165 | BnaA01g01910.1D2 | BnaC01g02600.1D2 |
| H165 | BnaA01g01970.1D2 | BnaC01g02660.1D2 |
| H165 | BnaA01g01980.1D2 | BnaC01g02670.1D2 |
| H165 | BnaA01g02030.1D2 | BnaC01g02710.1D2 |
| H165 | BnaA01g02070.1D2 | BnaC01g02740.1D2 |
| H165 | BnaA01g02280.1D2 | BnaC01g03070.1D2 |
| H165 | BnaA01g02290.1D2 | BnaC01g03080.1D2 |
| H165 | BnaA01g02310.1D2 | BnaC01g03100.1D2 |
| H165 | BnaA01g02320.1D2 | BnaC01g03110.1D2 |
| H165 | BnaA01g02380.1D2 | BnaC01g03170.1D2 |
| H165 | BnaA01g02390.1D2 | BnaC01g03180.1D2 |
| H165 | BnaA01g02430.1D2 | BnaC01g03220.1D2 |
| H165 | BnaA01g02640.1D2 | BnaC01g03500.1D2 |
| H165 | BnaA01g02710.1D2 | BnaC01g03560.1D2 |
| H165 | BnaA01g02750.1D2 | BnaC01g03590.1D2 |
| H165 | BnaA01g02780.1D2 | BnaC01g03650.1D2 |
| H165 | BnaA01g02790.1D2 | BnaC01g07600.1D2 |
| H165 | BnaA01g02810.1D2 | BnaC01g03670.1D2 |
| H165 | BnaA01g02870.1D2 | BnaC01g03730.1D2 |
| H165 | BnaA01g02950.1D2 | BnaC01g03840.1D2 |
| H165 | BnaA01g02960.1D2 | BnaC01g03850.1D2 |
| H165 | BnaA01g02980.1D2 | BnaC01g03870.1D2 |
| H165 | BnaA01g03110.1D2 | BnaC01g04030.1D2 |
| H165 | BnaA01g03130.1D2 | BnaC01g04050.1D2 |
| H165 | BnaA01g03170.1D2 | BnaC01g04110.1D2 |
| H165 | BnaA01g03210.1D2 | BnaC01g04150.1D2 |
| H165 | BnaA01g03220.1D2 | BnaC01g04160.1D2 |
| H165 | BnaA01g03290.1D2 | BnaC01g04230.1D2 |
| H165 | BnaA01g03310.1D2 | BnaC01g04250.1D2 |
| H165 | BnaA01g03330.1D2 | BnaC01g04270.1D2 |
| H165 | BnaA01g03350.1D2 | BnaC01g04290.1D2 |
| H165 | BnaA01g03410.1D2 | BnaC01g04370.1D2 |
| H165 | BnaA01g03430.1D2 | BnaC01g04390.1D2 |
| H165 | BnaA01g03440.1D2 | BnaC01g04400.1D2 |

|      |                  |                  |
|------|------------------|------------------|
| H165 | BnaA01g03500.1D2 | BnaC01g04460.1D2 |
| H165 | BnaA01g03550.1D2 | BnaC01g04530.1D2 |
| H165 | BnaA01g03580.1D2 | BnaC01g04570.1D2 |
| H165 | BnaA01g03590.1D2 | BnaC01g04580.1D2 |
| H165 | BnaA01g03600.1D2 | BnaC01g04590.1D2 |
| H165 | BnaA01g03620.1D2 | BnaC01g04600.1D2 |
| H165 | BnaA01g03640.1D2 | BnaC01g04620.1D2 |
| H165 | BnaA01g03730.1D2 | BnaC01g04660.1D2 |
| H165 | BnaA01g03750.1D2 | BnaC01g04670.1D2 |
| H165 | BnaA01g03770.1D2 | BnaC01g04690.1D2 |
| H165 | BnaA01g03780.1D2 | BnaC01g04700.1D2 |
| H165 | BnaA01g03810.1D2 | BnaC01g04830.1D2 |
| H165 | BnaA01g03850.1D2 | BnaC01g04870.1D2 |
| H165 | BnaA01g03980.1D2 | BnaC01g05010.1D2 |
| H165 | BnaA01g04250.1D2 | BnaC01g05280.1D2 |
| H165 | BnaA01g04370.1D2 | BnaC01g05440.1D2 |
| H165 | BnaA01g04440.1D2 | BnaC01g05510.1D2 |
| H165 | BnaA01g04640.1D2 | BnaC01g05740.1D2 |
| H165 | BnaA01g04760.1D2 | BnaC01g05860.1D2 |
| H165 | BnaA01g04930.1D2 | BnaC01g01560.1D2 |
| H165 | BnaA01g05010.1D2 | BnaC01g01410.1D2 |
| H165 | BnaA01g05120.1D2 | BnaC01g06030.1D2 |
| H165 | BnaA01g05170.1D2 | BnaC01g02820.1D2 |
| H165 | BnaA01g05200.1D2 | BnaC01g02870.1D2 |
| H165 | BnaA01g05240.1D2 | BnaC01g00070.1D2 |
| H165 | BnaA01g05260.1D2 | BnaC01g00090.1D2 |
| H165 | BnaA01g05480.1D2 | BnaC01g00330.1D2 |
| H165 | BnaA01g05550.1D2 | BnaC01g00570.1D2 |
| H165 | BnaA01g05580.1D2 | BnaC01g00430.1D2 |
| H165 | BnaA01g05650.1D2 | BnaC01g00470.1D2 |
| H165 | BnaA01g05780.1D2 | BnaC01g06070.1D2 |
| H165 | BnaA01g05850.1D2 | BnaC01g06120.1D2 |
| H165 | BnaA01g05870.1D2 | BnaC01g06140.1D2 |
| H165 | BnaA01g05900.1D2 | BnaC01g06180.1D2 |
| H165 | BnaA01g05980.1D2 | BnaC01g06270.1D2 |
| H165 | BnaA01g06080.1D2 | BnaC01g06400.1D2 |
| H165 | BnaA01g06150.1D2 | BnaC01g06460.1D2 |
| H165 | BnaA01g06180.1D2 | BnaC01g06490.1D2 |
| H165 | BnaA01g06380.1D2 | BnaC01g06600.1D2 |
| H165 | BnaA01g06400.1D2 | BnaC01g06630.1D2 |
| H165 | BnaA01g06410.1D2 | BnaC01g06640.1D2 |
| H165 | BnaA01g06420.1D2 | BnaC01g06650.1D2 |
| H165 | BnaA01g06610.1D2 | BnaC01g06970.1D2 |
| H165 | BnaA01g06620.1D2 | BnaC01g06990.1D2 |
| H165 | BnaA01g06680.1D2 | BnaC01g07070.1D2 |
| H165 | BnaA01g06760.1D2 | BnaC01g07120.1D2 |
| H165 | BnaA01g06820.1D2 | BnaC01g07190.1D2 |
| H165 | BnaA01g06830.1D2 | BnaC01g07200.1D2 |
| H165 | BnaA01g06840.1D2 | BnaC01g07210.1D2 |
| H165 | BnaA01g06870.1D2 | BnaC01g07240.1D2 |
| H165 | BnaA01g06890.1D2 | BnaC01g07260.1D2 |

|      |                  |                  |
|------|------------------|------------------|
| H165 | BnaA01g06900.1D2 | BnaC01g07270.1D2 |
| H165 | BnaA01g06990.1D2 | BnaC01g07390.1D2 |
| H165 | BnaA01g07000.1D2 | BnaC01g07400.1D2 |
| H165 | BnaA01g07010.1D2 | BnaC01g07410.1D2 |
| H165 | BnaA01g07020.1D2 | BnaC01g07420.1D2 |
| H165 | BnaA01g07050.1D2 | BnaC01g07450.1D2 |
| H165 | BnaA01g07070.1D2 | BnaC01g07470.1D2 |
| H165 | BnaA01g07100.1D2 | BnaC01g07880.1D2 |
| H165 | BnaA01g07140.1D2 | BnaC01g07920.1D2 |
| H165 | BnaA01g07150.1D2 | BnaC01g08000.1D2 |
| H165 | BnaA01g07160.1D2 | BnaC01g07990.1D2 |
| H165 | BnaA01g07180.1D2 | BnaC01g07970.1D2 |
| H165 | BnaA01g07300.1D2 | BnaC01g08150.1D2 |
| H165 | BnaA01g07400.1D2 | BnaC01g08250.1D2 |
| H165 | BnaA01g07410.1D2 | BnaC01g08260.1D2 |
| H165 | BnaA01g07470.1D2 | BnaC01g08310.1D2 |
| H165 | BnaA01g07480.1D2 | BnaC01g07630.1D2 |
| H165 | BnaA01g07510.1D2 | BnaC01g07630.1D2 |
| H165 | BnaA01g07520.1D2 | BnaC01g08330.1D2 |
| H165 | BnaA01g07540.1D2 | BnaC01g09100.1D2 |
| H165 | BnaA01g07550.1D2 | BnaC01g09100.1D2 |
| H165 | BnaA01g07770.1D2 | BnaC01g08540.1D2 |
| H165 | BnaA01g07800.1D2 | BnaC01g08570.1D2 |
| H165 | BnaA01g07830.1D2 | BnaC01g08580.1D2 |
| H165 | BnaA01g07840.1D2 | BnaC01g08590.1D2 |
| H165 | BnaA01g07870.1D2 | BnaC01g08620.1D2 |
| H165 | BnaA01g08030.1D2 | BnaC01g08840.1D2 |
| H165 | BnaA01g08060.1D2 | BnaC01g08870.1D2 |
| H165 | BnaA01g08070.1D2 | BnaC01g08880.1D2 |
| H165 | BnaA01g08100.1D2 | BnaC01g08900.1D2 |
| H165 | BnaA01g08260.1D2 | BnaC01g09050.1D2 |
| H165 | BnaA01g08280.1D2 | BnaC01g09160.1D2 |
| H165 | BnaA01g08300.1D2 | BnaC01g09140.1D2 |
| H165 | BnaA01g08320.1D2 | BnaC01g09120.1D2 |
| H165 | BnaA01g08330.1D2 | BnaC01g09110.1D2 |
| H165 | BnaA01g08390.1D2 | BnaC01g09200.1D2 |
| H165 | BnaA01g08430.1D2 | BnaC01g09250.1D2 |
| H165 | BnaA01g08840.1D2 | BnaC01g09760.1D2 |
| H165 | BnaA01g08990.1D2 | BnaC01g09860.1D2 |
| H165 | BnaA01g09030.1D2 | BnaC01g13150.1D2 |
| H165 | BnaA01g09140.1D2 | BnaC01g10040.1D2 |
| H165 | BnaA01g09160.1D2 | BnaC01g10060.1D2 |
| H165 | BnaA01g09200.1D2 | BnaC01g10100.1D2 |
| H165 | BnaA01g09210.1D2 | BnaC01g10110.1D2 |
| H165 | BnaA01g09320.1D2 | BnaC01g10260.1D2 |
| H165 | BnaA01g09340.1D2 | BnaC01g10280.1D2 |
| H165 | BnaA01g09350.1D2 | BnaC01g10290.1D2 |
| H165 | BnaA01g09360.1D2 | BnaC01g10300.1D2 |
| H165 | BnaA01g09520.1D2 | BnaC01g10390.1D2 |
| H165 | BnaA01g09550.1D2 | BnaC01g10420.1D2 |
| H165 | BnaA01g09560.1D2 | BnaC01g10430.1D2 |

|      |                  |                  |
|------|------------------|------------------|
| H165 | BnaA01g09570.1D2 | BnaC01g10440.1D2 |
| H165 | BnaA01g09580.1D2 | BnaC01g10490.1D2 |
| H165 | BnaA01g09590.1D2 | BnaC01g10500.1D2 |
| H165 | BnaA01g09610.1D2 | BnaC01g10520.1D2 |
| H165 | BnaA01g09620.1D2 | BnaC01g10530.1D2 |
| H165 | BnaA01g09630.1D2 | BnaC01g10540.1D2 |
| H165 | BnaA01g09810.1D2 | BnaC01g10760.1D2 |
| H165 | BnaA01g09820.1D2 | BnaC01g10770.1D2 |
| H165 | BnaA01g09840.1D2 | BnaC01g12900.1D2 |
| H165 | BnaA01g09880.1D2 | BnaC01g12940.1D2 |
| H165 | BnaA01g10130.1D2 | BnaC01g11310.1D2 |
| H165 | BnaA01g10220.1D2 | BnaC01g11480.1D2 |
| H165 | BnaA01g10280.1D2 | BnaC01g11570.1D2 |
| H165 | BnaA01g10310.1D2 | BnaC01g11600.1D2 |
| H165 | BnaA01g10360.1D2 | BnaC01g11630.1D2 |
| H165 | BnaA01g10400.1D2 | BnaC01g11670.1D2 |
| H165 | BnaA01g10430.1D2 | BnaC01g11710.1D2 |
| H165 | BnaA01g10510.1D2 | BnaC01g11770.1D2 |
| H165 | BnaA01g10560.1D2 | BnaC01g11800.1D2 |
| H165 | BnaA01g10570.1D2 | BnaC01g11810.1D2 |
| H165 | BnaA01g10600.1D2 | BnaC01g11840.1D2 |
| H165 | BnaA01g10610.1D2 | BnaC01g11850.1D2 |
| H165 | BnaA01g10980.1D2 | BnaC01g12230.1D2 |
| H165 | BnaA01g11050.1D2 | BnaC01g12340.1D2 |
| H165 | BnaA01g11110.1D2 | BnaC01g12390.1D2 |
| H165 | BnaA01g11180.1D2 | BnaC01g12470.1D2 |
| H165 | BnaA01g11290.1D2 | BnaC01g12550.1D2 |
| H165 | BnaA01g11300.1D2 | BnaC01g12560.1D2 |
| H165 | BnaA01g11350.1D2 | BnaC01g12630.1D2 |
| H165 | BnaA01g11370.1D2 | BnaC01g12650.1D2 |
| H165 | BnaA01g11440.1D2 | BnaC01g12750.1D2 |
| H165 | BnaA01g11530.1D2 | BnaC01g15620.1D2 |
| H165 | BnaA01g11700.1D2 | BnaC01g10460.1D2 |
| H165 | BnaA01g11720.1D2 | BnaC01g11440.1D2 |
| H165 | BnaA01g11730.1D2 | BnaC01g09080.1D2 |
| H165 | BnaA01g11740.1D2 | BnaC01g09090.1D2 |
| H165 | BnaA01g11870.1D2 | BnaC01g12850.1D2 |
| H165 | BnaA01g11900.1D2 | BnaC01g13240.1D2 |
| H165 | BnaA01g11970.1D2 | BnaC01g13300.1D2 |
| H165 | BnaA01g12120.1D2 | BnaC01g13410.1D2 |
| H165 | BnaA01g12160.1D2 | BnaC01g13440.1D2 |
| H165 | BnaA01g12200.1D2 | BnaC01g15650.1D2 |
| H165 | BnaA01g12240.1D2 | BnaC01g15690.1D2 |
| H165 | BnaA01g12330.1D2 | BnaC01g13550.1D2 |
| H165 | BnaA01g12330.1D2 | BnaC01g13560.1D2 |
| H165 | BnaA01g12430.1D2 | BnaC01g13710.1D2 |
| H165 | BnaA01g12610.1D2 | BnaC01g13740.1D2 |
| H165 | BnaA01g12650.1D2 | BnaC01g14130.1D2 |
| H165 | BnaA01g12690.1D2 | BnaC01g14200.1D2 |
| H165 | BnaA01g12710.1D2 | BnaC01g14210.1D2 |
| H165 | BnaA01g12820.1D2 | BnaC01g14310.1D2 |

|      |                  |                  |
|------|------------------|------------------|
| H165 | BnaA01g12840.1D2 | BnaC01g14330.1D2 |
| H165 | BnaA01g12850.1D2 | BnaC01g14340.1D2 |
| H165 | BnaA01g12930.1D2 | BnaC01g14420.1D2 |
| H165 | BnaA01g12950.1D2 | BnaC01g14190.1D2 |
| H165 | BnaA01g13030.1D2 | BnaC01g14610.1D2 |
| H165 | BnaA01g13040.1D2 | BnaC01g14620.1D2 |
| H165 | BnaA01g13120.1D2 | BnaC01g14700.1D2 |
| H165 | BnaA01g13130.1D2 | BnaC01g14710.1D2 |
| H165 | BnaA01g13220.1D2 | BnaC01g14800.1D2 |
| H165 | BnaA01g13270.1D2 | BnaC01g15580.1D2 |
| H165 | BnaA01g13360.1D2 | BnaC01g14950.1D2 |
| H165 | BnaA01g13380.1D2 | BnaC01g14970.1D2 |
| H165 | BnaA01g13410.1D2 | BnaC01g15000.1D2 |
| H165 | BnaA01g13420.1D2 | BnaC01g15010.1D2 |
| H165 | BnaA01g13470.1D2 | BnaC01g15060.1D2 |
| H165 | BnaA01g13480.1D2 | BnaC01g15070.1D2 |
| H165 | BnaA01g13650.1D2 | BnaC01g15220.1D2 |
| H165 | BnaA01g13700.1D2 | BnaC01g15270.1D2 |
| H165 | BnaA01g13720.1D2 | BnaC01g15290.1D2 |
| H165 | BnaA01g13750.1D2 | BnaC01g15320.1D2 |
| H165 | BnaA01g13910.1D2 | BnaC01g14460.1D2 |
| H165 | BnaA01g13920.1D2 | BnaC01g14450.1D2 |
| H165 | BnaA01g13970.1D2 | BnaC01g15790.1D2 |
| H165 | BnaA01g14110.1D2 | BnaC01g15910.1D2 |
| H165 | BnaA01g14260.1D2 | BnaC01g16110.1D2 |
| H165 | BnaA01g14270.1D2 | BnaC01g16120.1D2 |
| H165 | BnaA01g14340.1D2 | BnaC01g16210.1D2 |
| H165 | BnaA01g14410.1D2 | BnaC01g16330.1D2 |
| H165 | BnaA01g14420.1D2 | BnaC01g16330.1D2 |
| H165 | BnaA01g14500.1D2 | BnaC01g16410.1D2 |
| H165 | BnaA01g14530.1D2 | BnaC01g16450.1D2 |
| H165 | BnaA01g14550.1D2 | BnaC01g17290.1D2 |
| H165 | BnaA01g14620.1D2 | BnaC01g16530.1D2 |
| H165 | BnaA01g14660.1D2 | BnaC01g16600.1D2 |
| H165 | BnaA01g14670.1D2 | BnaC01g16610.1D2 |
| H165 | BnaA01g14680.1D2 | BnaC01g16620.1D2 |
| H165 | BnaA01g14730.1D2 | BnaC01g16690.1D2 |
| H165 | BnaA01g14750.1D2 | BnaC01g16700.1D2 |
| H165 | BnaA01g14780.1D2 | BnaC01g16730.1D2 |
| H165 | BnaA01g14790.1D2 | BnaC01g16740.1D2 |
| H165 | BnaA01g14800.1D2 | BnaC01g16750.1D2 |
| H165 | BnaA01g14850.1D2 | BnaC01g16800.1D2 |
| H165 | BnaA01g14920.1D2 | BnaC01g16910.1D2 |
| H165 | BnaA01g14950.1D2 | BnaC01g16940.1D2 |
| H165 | BnaA01g14960.1D2 | BnaC01g17000.1D2 |
| H165 | BnaA01g14990.1D2 | BnaC01g17030.1D2 |
| H165 | BnaA01g15120.1D2 | BnaC01g17190.1D2 |
| H165 | BnaA01g15220.1D2 | BnaC01g17420.1D2 |
| H165 | BnaA01g15360.1D2 | BnaC01g17600.1D2 |
| H165 | BnaA01g15430.1D2 | BnaC01g17650.1D2 |
| H165 | BnaA01g15430.1D2 | BnaC01g17660.1D2 |

|         |                  |                  |
|---------|------------------|------------------|
| H165    | BnaA01g15590.1D2 | BnaC01g17770.1D2 |
| H165    | BnaA01g15660.1D2 | BnaC01g17830.1D2 |
| H165    | BnaA01g15750.1D2 | BnaC01g17930.1D2 |
| H165    | BnaA01g16390.1D2 | BnaC01g16670.1D2 |
| RS_10_7 | BnaA01g01160.1D2 | BnaC01g01880.1D2 |
| RS_10_7 | BnaA01g01170.1D2 | BnaC01g01880.1D2 |
| RS_10_7 | BnaA01g01180.1D2 | BnaC01g01890.1D2 |
| RS_10_7 | BnaA01g01240.1D2 | BnaC01g01930.1D2 |
| RS_10_7 | BnaA01g01360.1D2 | BnaC01g02040.1D2 |
| RS_10_7 | BnaA01g01420.1D2 | BnaC01g02130.1D2 |
| RS_10_7 | BnaA01g01500.1D2 | BnaC01g02210.1D2 |
| RS_10_7 | BnaA01g01520.1D2 | BnaC01g02230.1D2 |
| RS_10_7 | BnaA01g01720.1D2 | BnaC01g02430.1D2 |
| RS_10_7 | BnaA01g01810.1D2 | BnaC01g02520.1D2 |
| RS_10_7 | BnaA01g01830.1D2 | BnaC01g02540.1D2 |
| RS_10_7 | BnaA01g01850.1D2 | BnaC01g02560.1D2 |
| RS_10_7 | BnaA01g01860.1D2 | BnaC01g02570.1D2 |
| RS_10_7 | BnaA01g01890.1D2 | BnaC01g02600.1D2 |
| RS_10_7 | BnaA01g01900.1D2 | BnaC01g02600.1D2 |
| RS_10_7 | BnaA01g01910.1D2 | BnaC01g02600.1D2 |
| RS_10_7 | BnaA01g11530.1D2 | BnaC01g15620.1D2 |
| RS_10_7 | BnaA01g12790.1D2 | BnaC01g14280.1D2 |
| RS_10_7 | BnaA01g12820.1D2 | BnaC01g14310.1D2 |
| RS_10_7 | BnaA01g12840.1D2 | BnaC01g14330.1D2 |
| RS_10_7 | BnaA01g12850.1D2 | BnaC01g14340.1D2 |
| RS_10_7 | BnaA01g12930.1D2 | BnaC01g14420.1D2 |
| RS_10_7 | BnaA01g12960.1D2 | BnaC01g14520.1D2 |
| RS_10_7 | BnaA01g13000.1D2 | BnaC01g14580.1D2 |
| RS_10_7 | BnaA01g13040.1D2 | BnaC01g14620.1D2 |
| RS_10_7 | BnaA01g13120.1D2 | BnaC01g14700.1D2 |
| RS_10_7 | BnaA01g13130.1D2 | BnaC01g14710.1D2 |
| RS_10_7 | BnaA01g13170.1D2 | BnaC01g14760.1D2 |
| RS_10_7 | BnaA01g13180.1D2 | BnaC01g14770.1D2 |
| RS_10_7 | BnaA01g13190.1D2 | BnaC01g14780.1D2 |
| RS_10_7 | BnaA01g13220.1D2 | BnaC01g14800.1D2 |
| RS_10_7 | BnaA01g13270.1D2 | BnaC01g15580.1D2 |
| RS_10_7 | BnaA01g13290.1D2 | BnaC01g14850.1D2 |
| RS_10_7 | BnaA01g13310.1D2 | BnaC01g14870.1D2 |
| RS_10_7 | BnaA01g13320.1D2 | BnaC01g14900.1D2 |
| RS_10_7 | BnaA01g13330.1D2 | BnaC01g14910.1D2 |
| RS_10_7 | BnaA01g13470.1D2 | BnaC01g15060.1D2 |
| RS_10_7 | BnaA01g13480.1D2 | BnaC01g15070.1D2 |
| RS_10_7 | BnaA01g13650.1D2 | BnaC01g15220.1D2 |
| RS_10_7 | BnaA01g13720.1D2 | BnaC01g15290.1D2 |
| RS_10_7 | BnaA01g13780.1D2 | BnaC01g15350.1D2 |
| RS_10_7 | BnaA01g13910.1D2 | BnaC01g14460.1D2 |
| RS_10_7 | BnaA01g13920.1D2 | BnaC01g14450.1D2 |
| RS_10_7 | BnaA01g13930.1D2 | BnaC01g15490.1D2 |
| RS_10_7 | BnaA01g13950.1D2 | BnaC01g15520.1D2 |
| RS_10_7 | BnaA01g14220.1D2 | BnaC01g16060.1D2 |
| RS_10_7 | BnaA01g14270.1D2 | BnaC01g16120.1D2 |



|         |                  |                  |
|---------|------------------|------------------|
| RS_10_7 | BnaA01g14340.1D2 | BnaC01g16210.1D2 |
| RS_10_7 | BnaA01g14410.1D2 | BnaC01g16330.1D2 |
| RS_10_7 | BnaA01g14420.1D2 | BnaC01g16330.1D2 |
| RS_10_7 | BnaA01g14440.1D2 | BnaC01g16350.1D2 |
| RS_10_7 | BnaA01g14500.1D2 | BnaC01g16410.1D2 |
| RS_10_7 | BnaA01g14530.1D2 | BnaC01g16450.1D2 |
| RS_10_7 | BnaA01g14610.1D2 | BnaC01g16520.1D2 |
| RS_10_7 | BnaA01g14620.1D2 | BnaC01g16530.1D2 |
| RS_10_7 | BnaA01g14670.1D2 | BnaC01g16610.1D2 |
| RS_10_7 | BnaA01g14730.1D2 | BnaC01g16690.1D2 |
| RS_10_7 | BnaA01g14850.1D2 | BnaC01g16800.1D2 |
| RS_10_7 | BnaA01g14920.1D2 | BnaC01g16910.1D2 |
| RS_10_7 | BnaA01g14990.1D2 | BnaC01g17030.1D2 |
| RS_10_7 | BnaA01g15030.1D2 | BnaC01g17080.1D2 |
| RS_10_7 | BnaA01g15170.1D2 | BnaC01g17380.1D2 |
| RS_10_7 | BnaA01g15220.1D2 | BnaC01g17420.1D2 |
| RS_10_7 | BnaA01g15380.1D2 | BnaC01g17620.1D2 |
| RS_10_7 | BnaA01g15410.1D2 | BnaC01g17630.1D2 |
| RS_10_7 | BnaA01g15410.1D2 | BnaC01g17660.1D2 |
| RS_10_7 | BnaA01g15410.1D2 | BnaC01g18040.1D2 |
| RS_10_7 | BnaA01g15420.1D2 | BnaC01g17630.1D2 |
| RS_10_7 | BnaA01g15420.1D2 | BnaC01g17660.1D2 |
| RS_10_7 | BnaA01g15420.1D2 | BnaC01g18040.1D2 |
| RS_10_7 | BnaA01g15430.1D2 | BnaC01g17630.1D2 |
| RS_10_7 | BnaA01g15430.1D2 | BnaC01g17660.1D2 |
| RS_10_7 | BnaA01g15440.1D2 | BnaC01g17630.1D2 |
| RS_10_7 | BnaA01g15440.1D2 | BnaC01g17660.1D2 |
| RS_10_7 | BnaA01g15510.1D2 | BnaC01g17690.1D2 |
| RS_10_7 | BnaA01g15600.1D2 | BnaC01g17780.1D2 |
| RS_10_7 | BnaA01g15660.1D2 | BnaC01g17830.1D2 |
| RS_10_7 | BnaA01g15750.1D2 | BnaC01g17930.1D2 |
| RS_10_7 | BnaA01g15790.1D2 | BnaC01g17950.1D2 |
| RS_10_7 | BnaA01g15800.1D2 | BnaC01g17960.1D2 |
| RS_10_7 | BnaA01g16020.1D2 | BnaC01g18720.1D2 |
| RS_10_7 | BnaA01g16070.1D2 | BnaC01g18740.1D2 |
| RS_10_7 | BnaA01g16110.1D2 | BnaC01g18790.1D2 |
| RS_10_7 | BnaA01g16120.1D2 | BnaC01g18800.1D2 |
| RS_10_7 | BnaA01g16180.1D2 | BnaC01g18850.1D2 |
| RS_10_7 | BnaA01g16190.1D2 | BnaC01g18860.1D2 |
| RS_10_7 | BnaA01g16210.1D2 | BnaC01g18880.1D2 |
| RS_10_7 | BnaA01g16220.1D2 | BnaC01g18890.1D2 |
| RS_10_7 | BnaA01g16230.1D2 | BnaC01g18900.1D2 |
| RS_10_7 | BnaA01g16250.1D2 | BnaC01g18920.1D2 |
| RS_10_7 | BnaA01g16270.1D2 | BnaC01g18930.1D2 |
| RS_10_7 | BnaA01g16400.1D2 | BnaC01g17230.1D2 |
| RS_10_7 | BnaA01g16510.1D2 | BnaC01g16220.1D2 |
| RS_10_7 | BnaA01g16540.1D2 | BnaC01g19080.1D2 |
| RS_10_7 | BnaA01g16550.1D2 | BnaC01g19570.1D2 |
| RS_10_7 | BnaA01g16600.1D2 | BnaC01g19110.1D2 |
| RS_10_7 | BnaA01g16770.1D2 | BnaC01g18410.1D2 |
| RS_10_7 | BnaA01g16810.1D2 | BnaC01g18120.1D2 |

|         |                  |                  |
|---------|------------------|------------------|
| RS_10_7 | BnaA01g16830.1D2 | BnaC01g18150.1D2 |
| RS_10_7 | BnaA01g16900.1D2 | BnaC01g18060.1D2 |
| RS_10_7 | BnaA01g17070.1D2 | BnaC01g19690.1D2 |
| RS_10_7 | BnaA01g17170.1D2 | BnaC01g19890.1D2 |
| RS_10_7 | BnaA01g17240.1D2 | BnaC01g19960.1D2 |
| RS_10_7 | BnaA01g17320.1D2 | BnaC01g20060.1D2 |
| RS_10_7 | BnaA01g17450.1D2 | BnaC01g19230.1D2 |
| RS_10_7 | BnaA01g17610.1D2 | BnaC01g19380.1D2 |
| RS_10_7 | BnaA01g17680.1D2 | BnaC01g19440.1D2 |
| RS_10_7 | BnaA01g17690.1D2 | BnaC01g19450.1D2 |
| RS_10_7 | BnaA01g17760.1D2 | BnaC01g19550.1D2 |
| RS_10_7 | BnaA01g17810.1D2 | BnaC01g20160.1D2 |
| RS_10_7 | BnaA01g17840.1D2 | BnaC01g20200.1D2 |
| RS_10_7 | BnaA01g17860.1D2 | BnaC01g20220.1D2 |
| RS_10_7 | BnaA01g17910.1D2 | BnaC01g21740.1D2 |
| RS_10_7 | BnaA01g17930.1D2 | BnaC01g21760.1D2 |
| RS_10_7 | BnaA01g17960.1D2 | BnaC01g19620.1D2 |
| RS_10_7 | BnaA01g17970.1D2 | BnaC01g19630.1D2 |
| RS_10_7 | BnaA01g17990.1D2 | BnaC01g20340.1D2 |
| RS_10_7 | BnaA01g18010.1D2 | BnaC01g20360.1D2 |
| RS_10_7 | BnaA01g18030.1D2 | BnaC01g20370.1D2 |
| RS_10_7 | BnaA01g18210.1D2 | BnaC01g20410.1D2 |
| RS_10_7 | BnaA01g18300.1D2 | BnaC01g20610.1D2 |
| RS_10_7 | BnaA01g18310.1D2 | BnaC01g20620.1D2 |
| RS_10_7 | BnaA01g18320.1D2 | BnaC01g20630.1D2 |
| RS_10_7 | BnaA01g18340.1D2 | BnaC01g20660.1D2 |
| RS_10_7 | BnaA01g18350.1D2 | BnaC01g20660.1D2 |
| RS_10_7 | BnaA01g18360.1D2 | BnaC01g20670.1D2 |
| RS_10_7 | BnaA01g18400.1D2 | BnaC01g21370.1D2 |
| RS_10_7 | BnaA01g18500.1D2 | BnaC01g20730.1D2 |
| RS_10_7 | BnaA01g18560.1D2 | BnaC01g20890.1D2 |
| RS_10_7 | BnaA01g18580.1D2 | BnaC01g20920.1D2 |
| RS_10_7 | BnaA01g18600.1D2 | BnaC01g20970.1D2 |
| RS_10_7 | BnaA01g18600.1D2 | BnaC01g20980.1D2 |
| RS_10_7 | BnaA01g18610.1D2 | BnaC01g20990.1D2 |
| RS_10_7 | BnaA01g18640.1D2 | BnaC01g21030.1D2 |
| RS_10_7 | BnaA01g18840.1D2 | BnaC01g21080.1D2 |
| RS_10_7 | BnaA01g18850.1D2 | BnaC01g21090.1D2 |
| RS_10_7 | BnaA01g18910.1D2 | BnaC01g21140.1D2 |
| RS_10_7 | BnaA01g18930.1D2 | BnaC01g21150.1D2 |
| RS_10_7 | BnaA01g18950.1D2 | BnaC01g21170.1D2 |
| RS_10_7 | BnaA01g18960.1D2 | BnaC01g21180.1D2 |
| RS_10_7 | BnaA01g18970.1D2 | BnaC01g21190.1D2 |
| RS_10_7 | BnaA01g18980.1D2 | BnaC01g21200.1D2 |
| RS_10_7 | BnaA01g19030.1D2 | BnaC01g21240.1D2 |
| RS_10_7 | BnaA01g19040.1D2 | BnaC01g21250.1D2 |
| RS_10_7 | BnaA01g19060.1D2 | BnaC01g21270.1D2 |
| RS_10_7 | BnaA01g19070.1D2 | BnaC01g02250.1D2 |
| RS_10_7 | BnaA01g19070.1D2 | BnaC01g22340.1D2 |
| RS_10_7 | BnaA01g19080.1D2 | BnaC01g22360.1D2 |
| RS_10_7 | BnaA01g19800.1D2 | BnaC01g22310.1D2 |

|         |                  |                  |
|---------|------------------|------------------|
| RS_10_7 | BnaA01g19850.1D2 | BnaC01g24230.1D2 |
| RS_10_7 | BnaA01g19980.1D2 | BnaC01g23520.1D2 |
| RS_10_7 | BnaA01g20120.1D2 | BnaC01g25030.1D2 |
| RS_10_7 | BnaA01g20130.1D2 | BnaC01g25020.1D2 |
| RS_10_7 | BnaA01g20140.1D2 | BnaC01g25010.1D2 |
| RS_10_7 | BnaA01g20420.1D2 | BnaC01g25060.1D2 |
| RS_10_7 | BnaA01g20480.1D2 | BnaC01g24010.1D2 |
| RS_10_7 | BnaA01g20490.1D2 | BnaC01g24020.1D2 |
| RS_10_7 | BnaA01g20510.1D2 | BnaC01g24060.1D2 |
| RS_10_7 | BnaA01g20590.1D2 | BnaC01g24130.1D2 |
| RS_10_7 | BnaA01g20690.1D2 | BnaC01g21650.1D2 |
| RS_10_7 | BnaA01g20700.1D2 | BnaC01g21640.1D2 |
| RS_10_7 | BnaA01g20810.1D2 | BnaC01g25950.1D2 |
| RS_10_7 | BnaA01g20920.1D2 | BnaC01g24940.1D2 |
| RS_10_7 | BnaA01g21570.1D2 | BnaC01g23850.1D2 |
| RS_10_7 | BnaA01g21660.1D2 | BnaC01g21550.1D2 |
| RS_10_7 | BnaA01g21670.1D2 | BnaC01g21560.1D2 |
| RS_10_7 | BnaA01g21710.1D2 | BnaC01g21580.1D2 |
| RS_10_7 | BnaA01g21750.1D2 | BnaC01g26040.1D2 |
| RS_10_7 | BnaA01g21760.1D2 | BnaC01g26050.1D2 |
| RS_10_7 | BnaA01g21780.1D2 | BnaC01g26080.1D2 |
| RS_10_7 | BnaA01g21800.1D2 | BnaC01g26110.1D2 |
| RS_10_7 | BnaA01g21920.1D2 | BnaC01g22170.1D2 |
| RS_10_7 | BnaA01g21990.1D2 | BnaC01g24160.1D2 |
| RS_10_7 | BnaA01g22430.1D2 | BnaC01g21620.1D2 |
| RS_10_7 | BnaA01g24720.1D2 | BnaC01g25140.1D2 |
| RS_10_7 | BnaA01g24940.1D2 | BnaC01g22670.1D2 |
| RS_10_7 | BnaA01g35180.1D2 | BnaC01g36760.1D2 |
| RS_10_7 | BnaA01g35200.1D2 | BnaC01g36770.1D2 |
| RS_10_7 | BnaA01g35220.1D2 | BnaC01g36790.1D2 |
| RS_10_7 | BnaA01g35260.1D2 | BnaC01g36840.1D2 |
| RS_10_7 | BnaA01g35370.1D2 | BnaC01g36980.1D2 |
| RS_10_7 | BnaA01g35410.1D2 | BnaC01g37020.1D2 |
| RS_10_7 | BnaA01g35420.1D2 | BnaC01g37030.1D2 |
| RS_10_7 | BnaA01g35460.1D2 | BnaC01g37060.1D2 |
| RS_10_7 | BnaA01g35580.1D2 | BnaC01g37180.1D2 |
| RS_10_7 | BnaA01g35750.1D2 | BnaC01g37370.1D2 |
| RS_4_6  | BnaA01g05120.1D2 | BnaC01g06030.1D2 |
| RS_4_6  | BnaA01g07010.1D2 | BnaC01g07410.1D2 |
| RS_4_6  | BnaA01g07160.1D2 | BnaC01g07990.1D2 |
| RS_4_6  | BnaA01g08990.1D2 | BnaC01g09860.1D2 |
| RS_4_6  | BnaA01g09000.1D2 | BnaC01g09870.1D2 |
| RS_4_6  | BnaA01g09010.1D2 | BnaC01g09880.1D2 |
| RS_4_6  | BnaA01g09030.1D2 | BnaC01g13150.1D2 |
| RS_4_6  | BnaA01g09040.1D2 | BnaC01g13160.1D2 |
| RS_4_6  | BnaA01g09090.1D2 | BnaC01g09960.1D2 |
| RS_4_6  | BnaA01g09120.1D2 | BnaC01g10000.1D2 |
| RS_4_6  | BnaA01g09140.1D2 | BnaC01g10040.1D2 |
| RS_4_6  | BnaA01g09150.1D2 | BnaC01g10050.1D2 |
| RS_4_6  | BnaA01g09160.1D2 | BnaC01g10060.1D2 |
| RS_4_6  | BnaA01g09200.1D2 | BnaC01g10100.1D2 |

|        |                  |                  |
|--------|------------------|------------------|
| RS_4_6 | BnaA01g09240.1D2 | BnaC01g10170.1D2 |
| RS_4_6 | BnaA01g09260.1D2 | BnaC01g10190.1D2 |
| RS_4_6 | BnaA01g09270.1D2 | BnaC01g10210.1D2 |
| RS_4_6 | BnaA01g09320.1D2 | BnaC01g10260.1D2 |
| RS_4_6 | BnaA01g09340.1D2 | BnaC01g10280.1D2 |
| RS_4_6 | BnaA01g09360.1D2 | BnaC01g10300.1D2 |
| RS_4_6 | BnaA01g09500.1D2 | BnaC01g10370.1D2 |
| RS_4_6 | BnaA01g09520.1D2 | BnaC01g10390.1D2 |
| RS_4_6 | BnaA01g09540.1D2 | BnaC01g10410.1D2 |
| RS_4_6 | BnaA01g09550.1D2 | BnaC01g10420.1D2 |
| RS_4_6 | BnaA01g09580.1D2 | BnaC01g10490.1D2 |
| RS_4_6 | BnaA01g09610.1D2 | BnaC01g10520.1D2 |
| RS_4_6 | BnaA01g09630.1D2 | BnaC01g10540.1D2 |
| RS_4_6 | BnaA01g09670.1D2 | BnaC01g10620.1D2 |
| RS_4_6 | BnaA01g09820.1D2 | BnaC01g10770.1D2 |
| RS_4_6 | BnaA01g09840.1D2 | BnaC01g12900.1D2 |
| RS_4_6 | BnaA01g09870.1D2 | BnaC01g12920.1D2 |
| RS_4_6 | BnaA01g09880.1D2 | BnaC01g12940.1D2 |
| RS_4_6 | BnaA01g09900.1D2 | BnaC01g11060.1D2 |
| RS_4_6 | BnaA01g09910.1D2 | BnaC01g11070.1D2 |
| RS_4_6 | BnaA01g09930.1D2 | BnaC01g11090.1D2 |
| RS_4_6 | BnaA01g10110.1D2 | BnaC01g11280.1D2 |
| RS_4_6 | BnaA01g10120.1D2 | BnaC01g11290.1D2 |
| RS_4_6 | BnaA01g10130.1D2 | BnaC01g11310.1D2 |
| RS_4_6 | BnaA01g10150.1D2 | BnaC01g11330.1D2 |
| RS_4_6 | BnaA01g10230.1D2 | BnaC01g11490.1D2 |
| RS_4_6 | BnaA01g10250.1D2 | BnaC01g11530.1D2 |
| RS_4_6 | BnaA01g10280.1D2 | BnaC01g11570.1D2 |
| RS_4_6 | BnaA01g10340.1D2 | BnaC01g11620.1D2 |
| RS_4_6 | BnaA01g10360.1D2 | BnaC01g11630.1D2 |
| RS_4_6 | BnaA01g10390.1D2 | BnaC01g11660.1D2 |
| RS_4_6 | BnaA01g10400.1D2 | BnaC01g11670.1D2 |
| RS_4_6 | BnaA01g10510.1D2 | BnaC01g11770.1D2 |
| RS_4_6 | BnaA01g10520.1D2 | BnaC01g11780.1D2 |
| RS_4_6 | BnaA01g10560.1D2 | BnaC01g11800.1D2 |
| RS_4_6 | BnaA01g10570.1D2 | BnaC01g11810.1D2 |
| RS_4_6 | BnaA01g10730.1D2 | BnaC01g11980.1D2 |
| RS_4_6 | BnaA01g10790.1D2 | BnaC01g12020.1D2 |
| RS_4_6 | BnaA01g10850.1D2 | BnaC01g12120.1D2 |
| RS_4_6 | BnaA01g10870.1D2 | BnaC01g12140.1D2 |
| RS_4_6 | BnaA01g10980.1D2 | BnaC01g12230.1D2 |
| RS_4_6 | BnaA01g11000.1D2 | BnaC01g12280.1D2 |
| RS_4_6 | BnaA01g11030.1D2 | BnaC01g12330.1D2 |
| RS_4_6 | BnaA01g11070.1D2 | BnaC01g12360.1D2 |
| RS_4_6 | BnaA01g11110.1D2 | BnaC01g12390.1D2 |
| RS_4_6 | BnaA01g11180.1D2 | BnaC01g12470.1D2 |
| RS_4_6 | BnaA01g11190.1D2 | BnaC01g12480.1D2 |
| RS_4_6 | BnaA01g11250.1D2 | BnaC01g12520.1D2 |
| RS_4_6 | BnaA01g11260.1D2 | BnaC01g12530.1D2 |
| RS_4_6 | BnaA01g11320.1D2 | BnaC01g12600.1D2 |
| RS_4_6 | BnaA01g11350.1D2 | BnaC01g12630.1D2 |

|        |                  |                  |
|--------|------------------|------------------|
| RS_4_6 | BnaA01g11360.1D2 | BnaC01g12640.1D2 |
| RS_4_6 | BnaA01g11370.1D2 | BnaC01g12650.1D2 |
| RS_4_6 | BnaA01g11400.1D2 | BnaC01g12710.1D2 |
| RS_4_6 | BnaA01g11430.1D2 | BnaC01g12730.1D2 |
| RS_4_6 | BnaA01g11440.1D2 | BnaC01g12750.1D2 |
| RS_4_6 | BnaA01g11530.1D2 | BnaC01g15620.1D2 |
| RS_4_6 | BnaA01g11580.1D2 | BnaC01g12980.1D2 |
| RS_4_6 | BnaA01g11700.1D2 | BnaC01g10460.1D2 |
| RS_4_6 | BnaA01g11770.1D2 | BnaC01g11750.1D2 |
| RS_4_6 | BnaA01g11870.1D2 | BnaC01g12850.1D2 |
| RS_4_6 | BnaA01g11900.1D2 | BnaC01g13240.1D2 |
| RS_4_6 | BnaA01g11920.1D2 | BnaC01g13260.1D2 |
| RS_4_6 | BnaA01g11930.1D2 | BnaC01g13260.1D2 |
| RS_4_6 | BnaA01g11940.1D2 | BnaC01g13280.1D2 |
| RS_4_6 | BnaA01g11970.1D2 | BnaC01g13300.1D2 |
| RS_4_6 | BnaA01g11980.1D2 | BnaC01g13310.1D2 |
| RS_4_6 | BnaA01g11990.1D2 | BnaC01g13320.1D2 |
| RS_4_6 | BnaA01g12100.1D2 | BnaC01g13390.1D2 |
| RS_4_6 | BnaA01g12140.1D2 | BnaC01g13420.1D2 |
| RS_4_6 | BnaA01g12160.1D2 | BnaC01g13440.1D2 |
| RS_4_6 | BnaA01g12190.1D2 | BnaC01g15640.1D2 |
| RS_4_6 | BnaA01g12200.1D2 | BnaC01g15650.1D2 |
| RS_4_6 | BnaA01g12420.1D2 | BnaC01g13700.1D2 |
| RS_4_6 | BnaA01g12430.1D2 | BnaC01g13710.1D2 |
| RS_4_6 | BnaA01g12440.1D2 | BnaC01g13720.1D2 |
| RS_4_6 | BnaA01g12610.1D2 | BnaC01g13740.1D2 |
| RS_4_6 | BnaA01g12630.1D2 | BnaC01g14070.1D2 |
| RS_4_6 | BnaA01g12650.1D2 | BnaC01g14130.1D2 |
| RS_4_6 | BnaA01g12670.1D2 | BnaC01g14150.1D2 |
| RS_4_6 | BnaA01g12680.1D2 | BnaC01g13730.1D2 |
| RS_4_6 | BnaA01g12690.1D2 | BnaC01g14200.1D2 |
| RS_4_6 | BnaA01g12710.1D2 | BnaC01g14210.1D2 |
| RS_4_6 | BnaA01g12740.1D2 | BnaC01g14220.1D2 |
| RS_4_6 | BnaA01g12760.1D2 | BnaC01g14250.1D2 |
| RS_4_6 | BnaA01g12780.1D2 | BnaC01g14270.1D2 |
| RS_4_6 | BnaA01g12790.1D2 | BnaC01g14280.1D2 |
| RS_4_6 | BnaA01g12810.1D2 | BnaC01g14300.1D2 |
| RS_4_6 | BnaA01g12820.1D2 | BnaC01g14310.1D2 |
| RS_4_6 | BnaA01g12840.1D2 | BnaC01g14330.1D2 |
| RS_4_6 | BnaA01g12850.1D2 | BnaC01g14340.1D2 |
| RS_4_6 | BnaA01g12930.1D2 | BnaC01g14420.1D2 |
| RS_4_6 | BnaA01g12950.1D2 | BnaC01g14190.1D2 |
| RS_4_6 | BnaA01g12960.1D2 | BnaC01g14520.1D2 |
| RS_4_6 | BnaA01g13000.1D2 | BnaC01g14580.1D2 |
| RS_4_6 | BnaA01g13010.1D2 | BnaC01g14590.1D2 |
| RS_4_6 | BnaA01g13040.1D2 | BnaC01g14620.1D2 |
| RS_4_6 | BnaA01g13120.1D2 | BnaC01g14700.1D2 |
| RS_4_6 | BnaA01g13130.1D2 | BnaC01g14710.1D2 |
| RS_4_6 | BnaA01g13170.1D2 | BnaC01g14760.1D2 |
| RS_4_6 | BnaA01g13190.1D2 | BnaC01g14780.1D2 |
| RS_4_6 | BnaA01g13220.1D2 | BnaC01g14800.1D2 |

|        |                  |                  |
|--------|------------------|------------------|
| RS_4_6 | BnaA01g13270.1D2 | BnaC01g15580.1D2 |
| RS_4_6 | BnaA01g13310.1D2 | BnaC01g14870.1D2 |
| RS_4_6 | BnaA01g13320.1D2 | BnaC01g14900.1D2 |
| RS_4_6 | BnaA01g13330.1D2 | BnaC01g14910.1D2 |
| RS_4_6 | BnaA01g13360.1D2 | BnaC01g14950.1D2 |
| RS_4_6 | BnaA01g13470.1D2 | BnaC01g15060.1D2 |
| RS_4_6 | BnaA01g13480.1D2 | BnaC01g15070.1D2 |
| RS_4_6 | BnaA01g13490.1D2 | BnaC01g15080.1D2 |
| RS_4_6 | BnaA01g13650.1D2 | BnaC01g15220.1D2 |
| RS_4_6 | BnaA01g13720.1D2 | BnaC01g15290.1D2 |
| RS_4_6 | BnaA01g13730.1D2 | BnaC01g15300.1D2 |
| RS_4_6 | BnaA01g13750.1D2 | BnaC01g15320.1D2 |
| RS_4_6 | BnaA01g13780.1D2 | BnaC01g15350.1D2 |
| RS_4_6 | BnaA01g13830.1D2 | BnaC01g15400.1D2 |
| RS_4_6 | BnaA01g13910.1D2 | BnaC01g14460.1D2 |
| RS_4_6 | BnaA01g13920.1D2 | BnaC01g14450.1D2 |
| RS_4_6 | BnaA01g13930.1D2 | BnaC01g15490.1D2 |
| RS_4_6 | BnaA01g13940.1D2 | BnaC01g15500.1D2 |
| RS_4_6 | BnaA01g13950.1D2 | BnaC01g15520.1D2 |
| RS_4_6 | BnaA01g14110.1D2 | BnaC01g15910.1D2 |
| RS_4_6 | BnaA01g14220.1D2 | BnaC01g16060.1D2 |
| RS_4_6 | BnaA01g14240.1D2 | BnaC01g16090.1D2 |
| RS_4_6 | BnaA01g14270.1D2 | BnaC01g16120.1D2 |
| RS_4_6 | BnaA01g14310.1D2 | BnaC01g16150.1D2 |
| RS_4_6 | BnaA01g14340.1D2 | BnaC01g16210.1D2 |
| RS_4_6 | BnaA01g14410.1D2 | BnaC01g16330.1D2 |
| RS_4_6 | BnaA01g14420.1D2 | BnaC01g16330.1D2 |
| RS_4_6 | BnaA01g14440.1D2 | BnaC01g16350.1D2 |
| RS_4_6 | BnaA01g14530.1D2 | BnaC01g16450.1D2 |
| RS_4_6 | BnaA01g14550.1D2 | BnaC01g17290.1D2 |
| RS_4_6 | BnaA01g14610.1D2 | BnaC01g16520.1D2 |
| RS_4_6 | BnaA01g14620.1D2 | BnaC01g16530.1D2 |
| RS_4_6 | BnaA01g14670.1D2 | BnaC01g16610.1D2 |
| RS_4_6 | BnaA01g14730.1D2 | BnaC01g16690.1D2 |
| RS_4_6 | BnaA01g14820.1D2 | BnaC01g16770.1D2 |
| RS_4_6 | BnaA01g14830.1D2 | BnaC01g16790.1D2 |
| RS_4_6 | BnaA01g14850.1D2 | BnaC01g16800.1D2 |
| RS_4_6 | BnaA01g14920.1D2 | BnaC01g16910.1D2 |
| RS_4_6 | BnaA01g14950.1D2 | BnaC01g16940.1D2 |
| RS_4_6 | BnaA01g14990.1D2 | BnaC01g17030.1D2 |
| RS_4_6 | BnaA01g15030.1D2 | BnaC01g17080.1D2 |
| RS_4_6 | BnaA01g15120.1D2 | BnaC01g17190.1D2 |
| RS_4_6 | BnaA01g15130.1D2 | BnaC01g17200.1D2 |
| RS_4_6 | BnaA01g15220.1D2 | BnaC01g17420.1D2 |
| RS_4_6 | BnaA01g15360.1D2 | BnaC01g17600.1D2 |
| RS_4_6 | BnaA01g15380.1D2 | BnaC01g17620.1D2 |
| RS_4_6 | BnaA01g15410.1D2 | BnaC01g17630.1D2 |
| RS_4_6 | BnaA01g15410.1D2 | BnaC01g17650.1D2 |
| RS_4_6 | BnaA01g15410.1D2 | BnaC01g17660.1D2 |
| RS_4_6 | BnaA01g15420.1D2 | BnaC01g17630.1D2 |
| RS_4_6 | BnaA01g15420.1D2 | BnaC01g17650.1D2 |

|        |                  |                  |
|--------|------------------|------------------|
| RS_4_6 | BnaA01g15420.1D2 | BnaC01g17660.1D2 |
| RS_4_6 | BnaA01g15430.1D2 | BnaC01g17630.1D2 |
| RS_4_6 | BnaA01g15430.1D2 | BnaC01g17650.1D2 |
| RS_4_6 | BnaA01g15430.1D2 | BnaC01g17660.1D2 |
| RS_4_6 | BnaA01g15430.1D2 | BnaC01g22150.1D2 |
| RS_4_6 | BnaA01g15500.1D2 | BnaC01g31050.1D2 |
| RS_4_6 | BnaA01g15600.1D2 | BnaC01g17780.1D2 |
| RS_4_6 | BnaA01g15650.1D2 | BnaC01g17820.1D2 |
| RS_4_6 | BnaA01g15660.1D2 | BnaC01g17830.1D2 |
| RS_4_6 | BnaA01g15750.1D2 | BnaC01g17930.1D2 |
| RS_4_6 | BnaA01g15790.1D2 | BnaC01g17950.1D2 |
| RS_4_6 | BnaA01g15800.1D2 | BnaC01g17960.1D2 |
| RS_4_6 | BnaA01g15830.1D2 | BnaC01g18290.1D2 |
| RS_4_6 | BnaA01g16020.1D2 | BnaC01g18720.1D2 |
| RS_4_6 | BnaA01g16050.1D2 | BnaC01g25450.1D2 |
| RS_4_6 | BnaA01g16070.1D2 | BnaC01g18740.1D2 |
| RS_4_6 | BnaA01g16080.1D2 | BnaC01g18750.1D2 |
| RS_4_6 | BnaA01g16110.1D2 | BnaC01g18790.1D2 |
| RS_4_6 | BnaA01g16120.1D2 | BnaC01g18800.1D2 |
| RS_4_6 | BnaA01g16130.1D2 | BnaC01g18810.1D2 |
| RS_4_6 | BnaA01g16180.1D2 | BnaC01g18850.1D2 |
| RS_4_6 | BnaA01g16190.1D2 | BnaC01g18860.1D2 |
| RS_4_6 | BnaA01g16210.1D2 | BnaC01g18880.1D2 |
| RS_4_6 | BnaA01g16220.1D2 | BnaC01g18890.1D2 |
| RS_4_6 | BnaA01g16230.1D2 | BnaC01g18900.1D2 |
| RS_4_6 | BnaA01g16250.1D2 | BnaC01g18920.1D2 |
| RS_4_6 | BnaA01g16270.1D2 | BnaC01g18930.1D2 |
| RS_4_6 | BnaA01g16340.1D2 | BnaC01g16550.1D2 |
| RS_4_6 | BnaA01g16400.1D2 | BnaC01g17230.1D2 |
| RS_4_6 | BnaA01g16410.1D2 | BnaC01g15980.1D2 |
| RS_4_6 | BnaA01g16510.1D2 | BnaC01g16220.1D2 |
| RS_4_6 | BnaA01g16540.1D2 | BnaC01g19080.1D2 |
| RS_4_6 | BnaA01g16600.1D2 | BnaC01g19110.1D2 |
| RS_4_6 | BnaA01g16680.1D2 | BnaC01g18530.1D2 |
| RS_4_6 | BnaA01g16710.1D2 | BnaC01g18560.1D2 |
| RS_4_6 | BnaA01g16710.1D2 | BnaC01g18570.1D2 |
| RS_4_6 | BnaA01g16750.1D2 | BnaC01g18390.1D2 |
| RS_4_6 | BnaA01g16760.1D2 | BnaC01g18400.1D2 |
| RS_4_6 | BnaA01g16770.1D2 | BnaC01g18410.1D2 |
| RS_4_6 | BnaA01g16810.1D2 | BnaC01g18120.1D2 |
| RS_4_6 | BnaA01g16830.1D2 | BnaC01g18150.1D2 |
| RS_4_6 | BnaA01g16900.1D2 | BnaC01g18060.1D2 |
| RS_4_6 | BnaA01g17070.1D2 | BnaC01g19690.1D2 |
| RS_4_6 | BnaA01g17170.1D2 | BnaC01g19890.1D2 |
| RS_4_6 | BnaA01g17240.1D2 | BnaC01g19960.1D2 |
| RS_4_6 | BnaA01g17310.1D2 | BnaC01g20020.1D2 |
| RS_4_6 | BnaA01g17320.1D2 | BnaC01g20060.1D2 |
| RS_4_6 | BnaA01g17450.1D2 | BnaC01g19230.1D2 |
| RS_4_6 | BnaA01g17580.1D2 | BnaC01g19360.1D2 |
| RS_4_6 | BnaA01g17610.1D2 | BnaC01g19380.1D2 |
| RS_4_6 | BnaA01g17620.1D2 | BnaC01g19390.1D2 |

|        |                  |                  |
|--------|------------------|------------------|
| RS_4_6 | BnaA01g17680.1D2 | BnaC01g19440.1D2 |
| RS_4_6 | BnaA01g17690.1D2 | BnaC01g19450.1D2 |
| RS_4_6 | BnaA01g17760.1D2 | BnaC01g19550.1D2 |
| RS_4_6 | BnaA01g17810.1D2 | BnaC01g20160.1D2 |
| RS_4_6 | BnaA01g17840.1D2 | BnaC01g20200.1D2 |
| RS_4_6 | BnaA01g17860.1D2 | BnaC01g20220.1D2 |
| RS_4_6 | BnaA01g17890.1D2 | BnaC01g20260.1D2 |
| RS_4_6 | BnaA01g17910.1D2 | BnaC01g21740.1D2 |
| RS_4_6 | BnaA01g17930.1D2 | BnaC01g21760.1D2 |
| RS_4_6 | BnaA01g17960.1D2 | BnaC01g19620.1D2 |
| RS_4_6 | BnaA01g17970.1D2 | BnaC01g19630.1D2 |
| RS_4_6 | BnaA01g17990.1D2 | BnaC01g20340.1D2 |
| RS_4_6 | BnaA01g18010.1D2 | BnaC01g20360.1D2 |
| RS_4_6 | BnaA01g18090.1D2 | BnaC01g28160.1D2 |
| RS_4_6 | BnaA01g18110.1D2 | BnaC01g21730.1D2 |
| RS_4_6 | BnaA01g18220.1D2 | BnaC01g20420.1D2 |
| RS_4_6 | BnaA01g18300.1D2 | BnaC01g20610.1D2 |
| RS_4_6 | BnaA01g18310.1D2 | BnaC01g20620.1D2 |
| RS_4_6 | BnaA01g18320.1D2 | BnaC01g20630.1D2 |
| RS_4_6 | BnaA01g18340.1D2 | BnaC01g20660.1D2 |
| RS_4_6 | BnaA01g18350.1D2 | BnaC01g20660.1D2 |
| RS_4_6 | BnaA01g18360.1D2 | BnaC01g20670.1D2 |
| RS_4_6 | BnaA01g18400.1D2 | BnaC01g21370.1D2 |
| RS_4_6 | BnaA01g18450.1D2 | BnaC01g20830.1D2 |
| RS_4_6 | BnaA01g18500.1D2 | BnaC01g20730.1D2 |
| RS_4_6 | BnaA01g18560.1D2 | BnaC01g20890.1D2 |
| RS_4_6 | BnaA01g18580.1D2 | BnaC01g20920.1D2 |
| RS_4_6 | BnaA01g18590.1D2 | BnaC01g20930.1D2 |
| RS_4_6 | BnaA01g18600.1D2 | BnaC01g20970.1D2 |
| RS_4_6 | BnaA01g18600.1D2 | BnaC01g20980.1D2 |
| RS_4_6 | BnaA01g18610.1D2 | BnaC01g20990.1D2 |
| RS_4_6 | BnaA01g18640.1D2 | BnaC01g21030.1D2 |
| RS_4_6 | BnaA01g18710.1D2 | BnaC01g21800.1D2 |
| RS_4_6 | BnaA01g18810.1D2 | BnaC01g25270.1D2 |
| RS_4_6 | BnaA01g18850.1D2 | BnaC01g21090.1D2 |
| RS_4_6 | BnaA01g18900.1D2 | BnaC01g21130.1D2 |
| RS_4_6 | BnaA01g18910.1D2 | BnaC01g21140.1D2 |
| RS_4_6 | BnaA01g18930.1D2 | BnaC01g21150.1D2 |
| RS_4_6 | BnaA01g18940.1D2 | BnaC01g21160.1D2 |
| RS_4_6 | BnaA01g18950.1D2 | BnaC01g21170.1D2 |
| RS_4_6 | BnaA01g18960.1D2 | BnaC01g21180.1D2 |
| RS_4_6 | BnaA01g18970.1D2 | BnaC01g21190.1D2 |
| RS_4_6 | BnaA01g18980.1D2 | BnaC01g21200.1D2 |
| RS_4_6 | BnaA01g18990.1D2 | BnaC01g21200.1D2 |
| RS_4_6 | BnaA01g19000.1D2 | BnaC01g21210.1D2 |
| RS_4_6 | BnaA01g19030.1D2 | BnaC01g21240.1D2 |
| RS_4_6 | BnaA01g19040.1D2 | BnaC01g21250.1D2 |
| RS_4_6 | BnaA01g19060.1D2 | BnaC01g21270.1D2 |
| RS_4_6 | BnaA01g19070.1D2 | BnaC01g22340.1D2 |
| RS_4_6 | BnaA01g19080.1D2 | BnaC01g22360.1D2 |
| RS_4_6 | BnaA01g19800.1D2 | BnaC01g22310.1D2 |



|        |                  |                  |
|--------|------------------|------------------|
| RS_4_6 | BnaA01g19850.1D2 | BnaC01g24230.1D2 |
| RS_4_6 | BnaA01g19960.1D2 | BnaC01g21790.1D2 |
| RS_4_6 | BnaA01g19980.1D2 | BnaC01g23520.1D2 |
| RS_4_6 | BnaA01g20040.1D2 | BnaC01g23580.1D2 |
| RS_4_6 | BnaA01g20070.1D2 | BnaC01g23620.1D2 |
| RS_4_6 | BnaA01g20080.1D2 | BnaC01g23630.1D2 |
| RS_4_6 | BnaA01g20110.1D2 | BnaC01g25030.1D2 |
| RS_4_6 | BnaA01g20120.1D2 | BnaC01g25030.1D2 |
| RS_4_6 | BnaA01g20130.1D2 | BnaC01g25020.1D2 |
| RS_4_6 | BnaA01g20330.1D2 | BnaC01g24550.1D2 |
| RS_4_6 | BnaA01g20340.1D2 | BnaC01g23920.1D2 |
| RS_4_6 | BnaA01g20420.1D2 | BnaC01g25060.1D2 |
| RS_4_6 | BnaA01g20480.1D2 | BnaC01g24010.1D2 |
| RS_4_6 | BnaA01g20490.1D2 | BnaC01g24020.1D2 |
| RS_4_6 | BnaA01g20510.1D2 | BnaC01g24060.1D2 |
| RS_4_6 | BnaA01g20520.1D2 | BnaC01g24070.1D2 |
| RS_4_6 | BnaA01g20670.1D2 | BnaC01g21670.1D2 |
| RS_4_6 | BnaA01g20690.1D2 | BnaC01g21650.1D2 |
| RS_4_6 | BnaA01g20700.1D2 | BnaC01g21640.1D2 |
| RS_4_6 | BnaA01g20720.1D2 | BnaC01g21820.1D2 |
| RS_4_6 | BnaA01g20810.1D2 | BnaC01g25950.1D2 |
| RS_4_6 | BnaA01g20860.1D2 | BnaC01g24910.1D2 |
| RS_4_6 | BnaA01g21120.1D2 | BnaC01g25470.1D2 |
| RS_4_6 | BnaA01g21360.1D2 | BnaC01g25970.1D2 |
| RS_4_6 | BnaA01g21440.1D2 | BnaC01g25110.1D2 |
| RS_4_6 | BnaA01g21570.1D2 | BnaC01g23850.1D2 |
| RS_4_6 | BnaA01g21660.1D2 | BnaC01g21550.1D2 |
| RS_4_6 | BnaA01g21710.1D2 | BnaC01g21580.1D2 |
| RS_4_6 | BnaA01g21750.1D2 | BnaC01g26040.1D2 |
| RS_4_6 | BnaA01g21760.1D2 | BnaC01g26050.1D2 |
| RS_4_6 | BnaA01g21770.1D2 | BnaC01g26060.1D2 |
| RS_4_6 | BnaA01g21780.1D2 | BnaC01g26080.1D2 |
| RS_4_6 | BnaA01g21800.1D2 | BnaC01g26110.1D2 |
| RS_4_6 | BnaA01g21890.1D2 | BnaC01g25800.1D2 |
| RS_4_6 | BnaA01g21920.1D2 | BnaC01g22170.1D2 |
| RS_4_6 | BnaA01g21990.1D2 | BnaC01g24160.1D2 |
| RS_4_6 | BnaA01g22090.1D2 | BnaC01g26260.1D2 |
| RS_4_6 | BnaA01g22140.1D2 | BnaC01g26330.1D2 |
| RS_4_6 | BnaA01g22190.1D2 | BnaC01g31100.1D2 |
| RS_4_6 | BnaA01g22290.1D2 | BnaC01g26830.1D2 |
| RS_4_6 | BnaA01g22350.1D2 | BnaC01g26630.1D2 |
| RS_4_6 | BnaA01g22370.1D2 | BnaC01g26610.1D2 |
| RS_4_6 | BnaA01g22430.1D2 | BnaC01g21620.1D2 |
| RS_4_6 | BnaA01g22650.1D2 | BnaC01g20430.1D2 |
| RS_4_6 | BnaA01g22820.1D2 | BnaC01g26900.1D2 |
| RS_4_6 | BnaA01g22830.1D2 | BnaC01g26910.1D2 |
| RS_4_6 | BnaA01g22890.1D2 | BnaC01g26980.1D2 |
| RS_4_6 | BnaA01g22910.1D2 | BnaC01g27020.1D2 |
| RS_4_6 | BnaA01g22940.1D2 | BnaC01g25750.1D2 |
| RS_4_6 | BnaA01g22990.1D2 | BnaC01g22600.1D2 |
| RS_4_6 | BnaA01g23040.1D2 | BnaC01g22140.1D2 |

|        |                  |                  |
|--------|------------------|------------------|
| RS_4_6 | BnaA01g23110.1D2 | BnaC01g26480.1D2 |
| RS_4_6 | BnaA01g23120.1D2 | BnaC01g26490.1D2 |
| RS_4_6 | BnaA01g23170.1D2 | BnaC01g26540.1D2 |
| RS_4_6 | BnaA01g23190.1D2 | BnaC01g26550.1D2 |
| RS_4_6 | BnaA01g23250.1D2 | BnaC01g27190.1D2 |
| RS_4_6 | BnaA01g23500.1D2 | BnaC01g22110.1D2 |
| RS_4_6 | BnaA01g23520.1D2 | BnaC01g21480.1D2 |
| RS_4_6 | BnaA01g23650.1D2 | BnaC01g28000.1D2 |
| RS_4_6 | BnaA01g23670.1D2 | BnaC01g28020.1D2 |
| RS_4_6 | BnaA01g23720.1D2 | BnaC01g21860.1D2 |
| RS_4_6 | BnaA01g23750.1D2 | BnaC01g27490.1D2 |
| RS_4_6 | BnaA01g23800.1D2 | BnaC01g27570.1D2 |
| RS_4_6 | BnaA01g23930.1D2 | BnaC01g27710.1D2 |
| RS_4_6 | BnaA01g24110.1D2 | BnaC01g28050.1D2 |
| RS_4_6 | BnaA01g24150.1D2 | BnaC01g28100.1D2 |
| RS_4_6 | BnaA01g24180.1D2 | BnaC01g29320.1D2 |
| RS_4_6 | BnaA01g24190.1D2 | BnaC01g29340.1D2 |
| RS_4_6 | BnaA01g24240.1D2 | BnaC01g18220.1D2 |
| RS_4_6 | BnaA01g24370.1D2 | BnaC01g28130.1D2 |
| RS_4_6 | BnaA01g24420.1D2 | BnaC01g28990.1D2 |
| RS_4_6 | BnaA01g24430.1D2 | BnaC01g28980.1D2 |
| RS_4_6 | BnaA01g24440.1D2 | BnaC01g28950.1D2 |
| RS_4_6 | BnaA01g24440.1D2 | BnaC01g28960.1D2 |
| RS_4_6 | BnaA01g24490.1D2 | BnaC01g31030.1D2 |
| RS_4_6 | BnaA01g24520.1D2 | BnaC01g30990.1D2 |
| RS_4_6 | BnaA01g24550.1D2 | BnaC01g30960.1D2 |
| RS_4_6 | BnaA01g24590.1D2 | BnaC01g28240.1D2 |
| RS_4_6 | BnaA01g24610.1D2 | BnaC01g28290.1D2 |
| RS_4_6 | BnaA01g24720.1D2 | BnaC01g25140.1D2 |
| RS_4_6 | BnaA01g24750.1D2 | BnaC01g28360.1D2 |
| RS_4_6 | BnaA01g24790.1D2 | BnaC01g20480.1D2 |
| RS_4_6 | BnaA01g24870.1D2 | BnaC01g28440.1D2 |
| RS_4_6 | BnaA01g24920.1D2 | BnaC01g25440.1D2 |
| RS_4_6 | BnaA01g24940.1D2 | BnaC01g22670.1D2 |
| RS_4_6 | BnaA01g25060.1D2 | BnaC01g28560.1D2 |
| RS_4_6 | BnaA01g25220.1D2 | BnaC01g29030.1D2 |
| RS_4_6 | BnaA01g25290.1D2 | BnaC01g29100.1D2 |
| RS_4_6 | BnaA01g25350.1D2 | BnaC01g29170.1D2 |
| RS_4_6 | BnaA01g25360.1D2 | BnaC01g29180.1D2 |
| RS_4_6 | BnaA01g25560.1D2 | BnaC01g29390.1D2 |
| RS_4_6 | BnaA01g25600.1D2 | BnaC01g31040.1D2 |
| RS_4_6 | BnaA01g25610.1D2 | BnaC01g31050.1D2 |
| RS_4_6 | BnaA01g25730.1D2 | BnaC01g29630.1D2 |
| RS_4_6 | BnaA01g25790.1D2 | BnaC01g29790.1D2 |
| RS_4_6 | BnaA01g25800.1D2 | BnaC01g29780.1D2 |
| RS_4_6 | BnaA01g25850.1D2 | BnaC01g29810.1D2 |
| RS_4_6 | BnaA01g25860.1D2 | BnaC01g29820.1D2 |
| RS_4_6 | BnaA01g25890.1D2 | BnaC01g29870.1D2 |
| RS_4_6 | BnaA01g25910.1D2 | BnaC01g29890.1D2 |
| RS_4_6 | BnaA01g25960.1D2 | BnaC01g29930.1D2 |
| RS_4_6 | BnaA01g26040.1D2 | BnaC01g30010.1D2 |

|        |                  |                  |
|--------|------------------|------------------|
| RS_4_6 | BnaA01g26110.1D2 | BnaC01g30110.1D2 |
| RS_4_6 | BnaA01g26120.1D2 | BnaC01g30120.1D2 |
| RS_4_6 | BnaA01g26130.1D2 | BnaC01g30900.1D2 |
| RS_4_6 | BnaA01g26150.1D2 | BnaC01g30920.1D2 |
| RS_4_6 | BnaA01g26160.1D2 | BnaC01g30920.1D2 |
| RS_4_6 | BnaA01g26260.1D2 | BnaC01g30270.1D2 |
| RS_4_6 | BnaA01g26320.1D2 | BnaC01g30360.1D2 |
| RS_4_6 | BnaA01g26330.1D2 | BnaC01g30360.1D2 |
| RS_4_6 | BnaA01g26340.1D2 | BnaC01g30360.1D2 |
| RS_4_6 | BnaA01g26370.1D2 | BnaC01g30380.1D2 |
| RS_4_6 | BnaA01g26400.1D2 | BnaC01g30410.1D2 |
| RS_4_6 | BnaA01g26410.1D2 | BnaC01g30430.1D2 |
| RS_4_6 | BnaA01g26430.1D2 | BnaC01g32940.1D2 |
| RS_4_6 | BnaA01g26540.1D2 | BnaC01g30480.1D2 |
| RS_4_6 | BnaA01g26550.1D2 | BnaC01g30490.1D2 |
| RS_4_6 | BnaA01g26560.1D2 | BnaC01g30500.1D2 |
| RS_4_6 | BnaA01g26590.1D2 | BnaC01g30530.1D2 |
| RS_4_6 | BnaA01g26600.1D2 | BnaC01g30540.1D2 |
| RS_4_6 | BnaA01g26610.1D2 | BnaC01g30550.1D2 |
| RS_4_6 | BnaA01g26630.1D2 | BnaC01g30570.1D2 |
| RS_4_6 | BnaA01g26640.1D2 | BnaC01g30580.1D2 |
| RS_4_6 | BnaA01g26650.1D2 | BnaC01g30590.1D2 |
| RS_4_6 | BnaA01g26660.1D2 | BnaC01g30590.1D2 |
| RS_4_6 | BnaA01g26700.1D2 | BnaC01g30670.1D2 |
| RS_4_6 | BnaA01g26710.1D2 | BnaC01g30660.1D2 |
| RS_4_6 | BnaA01g26880.1D2 | BnaC01g30800.1D2 |
| RS_4_6 | BnaA01g26890.1D2 | BnaC01g30800.1D2 |
| RS_4_6 | BnaA01g26920.1D2 | BnaC01g30820.1D2 |
| RS_4_6 | BnaA01g26990.1D2 | BnaC01g32260.1D2 |
| RS_4_6 | BnaA01g27050.1D2 | BnaC01g31270.1D2 |
| RS_4_6 | BnaA01g27100.1D2 | BnaC01g31290.1D2 |
| RS_4_6 | BnaA01g27140.1D2 | BnaC01g31330.1D2 |
| RS_4_6 | BnaA01g27180.1D2 | BnaC01g31340.1D2 |
| RS_4_6 | BnaA01g27190.1D2 | BnaC01g31350.1D2 |
| RS_4_6 | BnaA01g27210.1D2 | BnaC01g32160.1D2 |
| RS_4_6 | BnaA01g27220.1D2 | BnaC01g32150.1D2 |
| RS_4_6 | BnaA01g27260.1D2 | BnaC01g32110.1D2 |
| RS_4_6 | BnaA01g27280.1D2 | BnaC01g31530.1D2 |
| RS_4_6 | BnaA01g27440.1D2 | BnaC01g35140.1D2 |
| RS_4_6 | BnaA01g27500.1D2 | BnaC01g33590.1D2 |
| RS_4_6 | BnaA01g27570.1D2 | BnaC01g31430.1D2 |
| RS_4_6 | BnaA01g27660.1D2 | BnaC01g32010.1D2 |
| RS_4_6 | BnaA01g27730.1D2 | BnaC01g33080.1D2 |
| RS_4_6 | BnaA01g27780.1D2 | BnaC01g31820.1D2 |
| RS_4_6 | BnaA01g27870.1D2 | BnaC01g31860.1D2 |
| RS_4_6 | BnaA01g27870.1D2 | BnaC01g32180.1D2 |
| RS_4_6 | BnaA01g27880.1D2 | BnaC01g31870.1D2 |
| RS_4_6 | BnaA01g27900.1D2 | BnaC01g31920.1D2 |
| RS_4_6 | BnaA01g27960.1D2 | BnaC01g32970.1D2 |
| RS_4_6 | BnaA01g28020.1D2 | BnaC01g32220.1D2 |
| RS_4_6 | BnaA01g28060.1D2 | BnaC01g32280.1D2 |

|        |                  |                  |
|--------|------------------|------------------|
| RS_4_6 | BnaA01g28090.1D2 | BnaC01g32300.1D2 |
| RS_4_6 | BnaA01g28100.1D2 | BnaC01g32310.1D2 |
| RS_4_6 | BnaA01g28200.1D2 | BnaC01g32410.1D2 |
| RS_4_6 | BnaA01g28210.1D2 | BnaC01g32420.1D2 |
| RS_4_6 | BnaA01g28260.1D2 | BnaC01g32480.1D2 |
| RS_4_6 | BnaA01g28280.1D2 | BnaC01g32500.1D2 |
| RS_4_6 | BnaA01g28290.1D2 | BnaC01g32510.1D2 |
| RS_4_6 | BnaA01g28400.1D2 | BnaC01g33140.1D2 |
| RS_4_6 | BnaA01g28430.1D2 | BnaC01g32770.1D2 |
| RS_4_6 | BnaA01g28440.1D2 | BnaC01g32760.1D2 |
| RS_4_6 | BnaA01g28450.1D2 | BnaC01g32750.1D2 |
| RS_4_6 | BnaA01g28470.1D2 | BnaC01g32730.1D2 |
| RS_4_6 | BnaA01g28480.1D2 | BnaC01g32720.1D2 |
| RS_4_6 | BnaA01g28540.1D2 | BnaC01g32670.1D2 |
| RS_4_6 | BnaA01g28570.1D2 | BnaC01g32640.1D2 |
| RS_4_6 | BnaA01g28650.1D2 | BnaC01g33250.1D2 |
| RS_4_6 | BnaA01g28660.1D2 | BnaC01g33270.1D2 |
| RS_4_6 | BnaA01g28720.1D2 | BnaC01g33340.1D2 |
| RS_4_6 | BnaA01g28740.1D2 | BnaC01g33370.1D2 |
| RS_4_6 | BnaA01g28750.1D2 | BnaC01g33380.1D2 |
| RS_4_6 | BnaA01g28760.1D2 | BnaC01g33390.1D2 |
| RS_4_6 | BnaA01g28790.1D2 | BnaC01g33430.1D2 |
| RS_4_6 | BnaA01g28990.1D2 | BnaC01g33010.1D2 |
| RS_4_6 | BnaA01g30680.1D2 | BnaC01g33620.1D2 |
| RS_4_6 | BnaA01g30690.1D2 | BnaC01g33630.1D2 |
| RS_4_6 | BnaA01g30700.1D2 | BnaC01g33640.1D2 |
| RS_4_6 | BnaA01g30700.1D2 | BnaC01g33650.1D2 |
| RS_4_6 | BnaA01g30720.1D2 | BnaC01g33660.1D2 |
| RS_4_6 | BnaA01g30760.1D2 | BnaC01g33690.1D2 |
| RS_4_6 | BnaA01g30800.1D2 | BnaC01g32200.1D2 |
| RS_4_6 | BnaA01g30810.1D2 | BnaC01g33800.1D2 |
| RS_4_6 | BnaA01g30890.1D2 | BnaC01g33860.1D2 |
| RS_4_6 | BnaA01g30920.1D2 | BnaC01g33880.1D2 |
| RS_4_6 | BnaA01g30970.1D2 | BnaC01g33940.1D2 |
| RS_4_6 | BnaA01g30980.1D2 | BnaC01g33950.1D2 |
| RS_4_6 | BnaA01g30990.1D2 | BnaC01g33970.1D2 |
| RS_4_6 | BnaA01g31010.1D2 | BnaC01g34180.1D2 |
| RS_4_6 | BnaA01g31030.1D2 | BnaC01g35130.1D2 |
| RS_4_6 | BnaA01g31050.1D2 | BnaC01g33780.1D2 |
| RS_4_6 | BnaA01g31060.1D2 | BnaC01g33770.1D2 |
| RS_4_6 | BnaA01g31080.1D2 | BnaC01g33730.1D2 |
| RS_4_6 | BnaA01g31090.1D2 | BnaC01g33710.1D2 |
| RS_4_6 | BnaA01g31090.1D2 | BnaC01g33720.1D2 |
| RS_4_6 | BnaA01g31130.1D2 | BnaC01g34550.1D2 |
| RS_4_6 | BnaA01g31170.1D2 | BnaC01g34620.1D2 |
| RS_4_6 | BnaA01g31240.1D2 | BnaC01g34700.1D2 |
| RS_4_6 | BnaA01g31260.1D2 | BnaC01g34720.1D2 |
| RS_4_6 | BnaA01g31440.1D2 | BnaC01g34970.1D2 |
| RS_4_6 | BnaA01g31550.1D2 | BnaC01g35060.1D2 |
| RS_4_6 | BnaA01g31680.1D2 | BnaC01g34330.1D2 |
| RS_4_6 | BnaA01g31710.1D2 | BnaC01g34270.1D2 |

|        |                  |                  |
|--------|------------------|------------------|
| RS_4_6 | BnaA01g31720.1D2 | BnaC01g34260.1D2 |
| RS_4_6 | BnaA01g32240.1D2 | BnaC01g35400.1D2 |
| RS_4_6 | BnaA01g32280.1D2 | BnaC01g35370.1D2 |
| RS_4_6 | BnaA01g32370.1D2 | BnaC01g35290.1D2 |
| RS_4_6 | BnaA01g32380.1D2 | BnaC01g35270.1D2 |
| RS_4_6 | BnaA01g32400.1D2 | BnaC01g35250.1D2 |
| RS_4_6 | BnaA01g32610.1D2 | BnaC01g34010.1D2 |
| RS_4_6 | BnaA01g32690.1D2 | BnaC01g34110.1D2 |
| RS_4_6 | BnaA01g32700.1D2 | BnaC01g34120.1D2 |
| RS_4_6 | BnaA01g33630.1D2 | BnaC01g35490.1D2 |
| RS_4_6 | BnaA01g33670.1D2 | BnaC01g35520.1D2 |
| RS_4_6 | BnaA01g33690.1D2 | BnaC01g35540.1D2 |
| RS_4_6 | BnaA01g33730.1D2 | BnaC01g35570.1D2 |
| RS_4_6 | BnaA01g33760.1D2 | BnaC01g35590.1D2 |
| RS_4_6 | BnaA01g33780.1D2 | BnaC01g35640.1D2 |
| RS_4_6 | BnaA01g33800.1D2 | BnaC01g35670.1D2 |
| RS_4_6 | BnaA01g33840.1D2 | BnaC01g35710.1D2 |
| RS_4_6 | BnaA01g33880.1D2 | BnaC01g35750.1D2 |
| RS_4_6 | BnaA01g33960.1D2 | BnaC01g36030.1D2 |
| RS_4_6 | BnaA01g33970.1D2 | BnaC01g36040.1D2 |
| RS_4_6 | BnaA01g35470.1D2 | BnaC01g37100.1D2 |
| RS_4_6 | BnaA01g35470.1D2 | BnaC01g37120.1D2 |

**List of HE genes (A02 to C02)**

| <b>Accession</b> | <b>Lost gene</b> | <b>Duplicated HE gene</b> |
|------------------|------------------|---------------------------|
| RS_10_7          | BnaA02g04830.1D2 | BnaC02g33250.1D2          |
| RS_10_7          | BnaA02g23430.1D2 | BnaC02g29390.1D2          |
| RS_10_7          | BnaA02g24340.1D2 | BnaC02g30180.1D2          |
| RS_10_7          | BnaA02g24560.1D2 | BnaC02g30500.1D2          |
| RS_10_7          | BnaA02g24690.1D2 | BnaC02g30610.1D2          |
| RS_10_7          | BnaA02g24740.1D2 | BnaC02g30660.1D2          |
| RS_10_7          | BnaA02g24780.1D2 | BnaC02g30670.1D2          |
| RS_10_7          | BnaA02g24900.1D2 | BnaC02g31690.1D2          |
| RS_10_7          | BnaA02g24910.1D2 | BnaC02g31710.1D2          |
| RS_10_7          | BnaA02g24940.1D2 | BnaC02g31780.1D2          |
| RS_10_7          | BnaA02g25020.1D2 | BnaC02g31380.1D2          |
| RS_10_7          | BnaA02g25070.1D2 | BnaC02g30770.1D2          |
| RS_10_7          | BnaA02g25170.1D2 | BnaC02g31930.1D2          |
| RS_10_7          | BnaA02g25190.1D2 | BnaC02g31950.1D2          |
| RS_10_7          | BnaA02g25260.1D2 | BnaC02g32020.1D2          |
| RS_10_7          | BnaA02g25440.1D2 | BnaC02g31590.1D2          |
| RS_10_7          | BnaA02g25450.1D2 | BnaC02g31580.1D2          |
| RS_10_7          | BnaA02g25460.1D2 | BnaC02g31570.1D2          |
| RS_10_7          | BnaA02g25490.1D2 | BnaC02g31560.1D2          |
| RS_10_7          | BnaA02g25510.1D2 | BnaC02g31550.1D2          |
| RS_10_7          | BnaA02g25520.1D2 | BnaC02g31540.1D2          |
| RS_10_7          | BnaA02g25550.1D2 | BnaC02g32040.1D2          |
| RS_10_7          | BnaA02g25610.1D2 | BnaC02g32100.1D2          |
| RS_10_7          | BnaA02g25640.1D2 | BnaC02g32130.1D2          |
| RS_10_7          | BnaA02g25650.1D2 | BnaC02g32140.1D2          |
| RS_10_7          | BnaA02g25750.1D2 | BnaC02g31890.1D2          |

|         |                  |                  |
|---------|------------------|------------------|
| RS_10_7 | BnaA02g25780.1D2 | BnaC02g31900.1D2 |
| RS_10_7 | BnaA02g25880.1D2 | BnaC02g32750.1D2 |
| RS_10_7 | BnaA02g25910.1D2 | BnaC02g33340.1D2 |
| RS_10_7 | BnaA02g26060.1D2 | BnaC02g33020.1D2 |
| RS_10_7 | BnaA02g26140.1D2 | BnaC02g33120.1D2 |
| RS_10_7 | BnaA02g26360.1D2 | BnaC02g33300.1D2 |
| RS_10_7 | BnaA02g26370.1D2 | BnaC02g33310.1D2 |
| RS_10_7 | BnaA02g26420.1D2 | BnaC02g33450.1D2 |
| RS_10_7 | BnaA02g26450.1D2 | BnaC02g33490.1D2 |
| RS_10_7 | BnaA02g26470.1D2 | BnaC02g33530.1D2 |
| RS_10_7 | BnaA02g26730.1D2 | BnaC02g32840.1D2 |
| RS_10_7 | BnaA02g26740.1D2 | BnaC02g32830.1D2 |
| RS_10_7 | BnaA02g26770.1D2 | BnaC02g32600.1D2 |
| RS_10_7 | BnaA02g26780.1D2 | BnaC02g32590.1D2 |
| RS_10_7 | BnaA02g26800.1D2 | BnaC02g32560.1D2 |
| RS_10_7 | BnaA02g26820.1D2 | BnaC02g32520.1D2 |
| RS_10_7 | BnaA02g26830.1D2 | BnaC02g32510.1D2 |
| RS_10_7 | BnaA02g26850.1D2 | BnaC02g32480.1D2 |
| RS_10_7 | BnaA02g26860.1D2 | BnaC02g32470.1D2 |
| RS_10_7 | BnaA02g26880.1D2 | BnaC02g32450.1D2 |
| RS_10_7 | BnaA02g26920.1D2 | BnaC02g32380.1D2 |
| RS_10_7 | BnaA02g26940.1D2 | BnaC02g32360.1D2 |
| RS_10_7 | BnaA02g26960.1D2 | BnaC02g32330.1D2 |
| RS_10_7 | BnaA02g26980.1D2 | BnaC02g32300.1D2 |
| RS_10_7 | BnaA02g27030.1D2 | BnaC02g32240.1D2 |
| RS_10_7 | BnaA02g27090.1D2 | BnaC02g33910.1D2 |
| RS_10_7 | BnaA02g27170.1D2 | BnaC02g32390.1D2 |
| RS_10_7 | BnaA02g27210.1D2 | BnaC02g33990.1D2 |
| RS_10_7 | BnaA02g27240.1D2 | BnaC02g34050.1D2 |
| RS_10_7 | BnaA02g27270.1D2 | BnaC02g34070.1D2 |
| RS_10_7 | BnaA02g27280.1D2 | BnaC02g34080.1D2 |
| RS_10_7 | BnaA02g27290.1D2 | BnaC02g34130.1D2 |
| RS_10_7 | BnaA02g27300.1D2 | BnaC02g34140.1D2 |
| RS_10_7 | BnaA02g27370.1D2 | BnaC02g33810.1D2 |
| RS_10_7 | BnaA02g27410.1D2 | BnaC02g34260.1D2 |
| RS_10_7 | BnaA02g27420.1D2 | BnaC02g34270.1D2 |
| RS_10_7 | BnaA02g27440.1D2 | BnaC02g34290.1D2 |
| RS_10_7 | BnaA02g27450.1D2 | BnaC02g34300.1D2 |
| RS_10_7 | BnaA02g27500.1D2 | BnaC02g34350.1D2 |
| RS_10_7 | BnaA02g27550.1D2 | BnaC02g35010.1D2 |
| RS_10_7 | BnaA02g27680.1D2 | BnaC02g33740.1D2 |
| RS_10_7 | BnaA02g27730.1D2 | BnaC02g33500.1D2 |
| RS_10_7 | BnaA02g27780.1D2 | BnaC02g34400.1D2 |
| RS_10_7 | BnaA02g27850.1D2 | BnaC02g34570.1D2 |
| RS_10_7 | BnaA02g27870.1D2 | BnaC02g34590.1D2 |
| RS_10_7 | BnaA02g27880.1D2 | BnaC02g34600.1D2 |
| RS_10_7 | BnaA02g27960.1D2 | BnaC02g35200.1D2 |
| RS_10_7 | BnaA02g28040.1D2 | BnaC02g34680.1D2 |
| RS_10_7 | BnaA02g28140.1D2 | BnaC02g34760.1D2 |
| RS_10_7 | BnaA02g28150.1D2 | BnaC02g34770.1D2 |
| RS_10_7 | BnaA02g28180.1D2 | BnaC02g34810.1D2 |

|         |                  |                  |
|---------|------------------|------------------|
| RS_10_7 | BnaA02g28200.1D2 | BnaC02g34820.1D2 |
| RS_10_7 | BnaA02g28210.1D2 | BnaC02g34840.1D2 |
| RS_10_7 | BnaA02g28220.1D2 | BnaC02g34850.1D2 |
| RS_10_7 | BnaA02g28230.1D2 | BnaC02g34860.1D2 |
| RS_10_7 | BnaA02g28280.1D2 | BnaC02g34900.1D2 |
| RS_10_7 | BnaA02g28310.1D2 | BnaC02g34950.1D2 |
| RS_10_7 | BnaA02g28400.1D2 | BnaC02g36120.1D2 |
| RS_10_7 | BnaA02g28460.1D2 | BnaC02g36170.1D2 |
| RS_10_7 | BnaA02g28470.1D2 | BnaC02g36180.1D2 |
| RS_10_7 | BnaA02g28480.1D2 | BnaC02g36190.1D2 |
| RS_10_7 | BnaA02g28550.1D2 | BnaC02g35090.1D2 |
| RS_10_7 | BnaA02g28590.1D2 | BnaC02g35220.1D2 |
| RS_10_7 | BnaA02g28600.1D2 | BnaC02g35230.1D2 |
| RS_10_7 | BnaA02g28610.1D2 | BnaC02g35240.1D2 |
| RS_10_7 | BnaA02g28890.1D2 | BnaC02g35430.1D2 |
| RS_10_7 | BnaA02g28910.1D2 | BnaC02g35460.1D2 |
| RS_10_7 | BnaA02g28950.1D2 | BnaC02g35490.1D2 |
| RS_10_7 | BnaA02g29110.1D2 | BnaC02g35650.1D2 |
| RS_10_7 | BnaA02g29200.1D2 | BnaC02g35780.1D2 |
| RS_10_7 | BnaA02g29210.1D2 | BnaC02g35790.1D2 |
| RS_10_7 | BnaA02g29220.1D2 | BnaC02g35810.1D2 |
| RS_10_7 | BnaA02g29240.1D2 | BnaC02g35850.1D2 |
| RS_10_7 | BnaA02g29310.1D2 | BnaC02g35920.1D2 |
| RS_10_7 | BnaA02g29320.1D2 | BnaC02g35930.1D2 |
| RS_10_7 | BnaA02g29350.1D2 | BnaC02g35960.1D2 |
| RS_10_7 | BnaA02g29430.1D2 | BnaC02g17330.1D2 |
| RS_10_7 | BnaA02g29520.1D2 | BnaC02g36300.1D2 |
| RS_10_7 | BnaA02g29540.1D2 | BnaC02g36340.1D2 |
| RS_10_7 | BnaA02g29560.1D2 | BnaC02g36350.1D2 |
| RS_10_7 | BnaA02g29570.1D2 | BnaC02g36360.1D2 |
| RS_10_7 | BnaA02g29580.1D2 | BnaC02g36380.1D2 |
| RS_10_7 | BnaA02g29590.1D2 | BnaC02g36390.1D2 |
| RS_10_7 | BnaA02g29640.1D2 | BnaC02g36440.1D2 |
| RS_10_7 | BnaA02g29670.1D2 | BnaC02g36470.1D2 |
| RS_10_7 | BnaA02g29730.1D2 | BnaC02g36570.1D2 |
| RS_10_7 | BnaA02g29740.1D2 | BnaC02g24530.1D2 |
| RS_10_7 | BnaA02g29740.1D2 | BnaC02g36580.1D2 |
| RS_10_7 | BnaA02g29750.1D2 | BnaC02g36600.1D2 |
| RS_10_7 | BnaA02g29760.1D2 | BnaC02g36610.1D2 |
| RS_10_7 | BnaA02g29770.1D2 | BnaC02g36620.1D2 |
| RS_10_7 | BnaA02g29840.1D2 | BnaC02g36710.1D2 |
| RS_10_7 | BnaA02g29920.1D2 | BnaC02g36770.1D2 |
| RS_10_7 | BnaA02g29940.1D2 | BnaC02g36810.1D2 |
| RS_10_7 | BnaA02g29960.1D2 | BnaC02g37700.1D2 |
| RS_10_7 | BnaA02g30010.1D2 | BnaC02g36830.1D2 |
| RS_10_7 | BnaA02g30020.1D2 | BnaC02g36830.1D2 |
| RS_10_7 | BnaA02g30050.1D2 | BnaC02g36840.1D2 |
| RS_10_7 | BnaA02g30080.1D2 | BnaC02g36870.1D2 |
| RS_10_7 | BnaA02g30110.1D2 | BnaC02g36950.1D2 |
| RS_10_7 | BnaA02g30150.1D2 | BnaC02g36990.1D2 |
| RS_10_7 | BnaA02g30220.1D2 | BnaC02g36030.1D2 |

|         |                  |                  |
|---------|------------------|------------------|
| RS_10_7 | BnaA02g30240.1D2 | BnaC02g37020.1D2 |
| RS_10_7 | BnaA02g30280.1D2 | BnaC02g37050.1D2 |
| RS_10_7 | BnaA02g30290.1D2 | BnaC02g37060.1D2 |
| RS_10_7 | BnaA02g30370.1D2 | BnaC02g37090.1D2 |
| RS_10_7 | BnaA02g30450.1D2 | BnaC02g37220.1D2 |
| RS_10_7 | BnaA02g30610.1D2 | BnaC02g37820.1D2 |
| RS_10_7 | BnaA02g30630.1D2 | BnaC02g37840.1D2 |
| RS_10_7 | BnaA02g30680.1D2 | BnaC02g37880.1D2 |
| RS_10_7 | BnaA02g30700.1D2 | BnaC02g37900.1D2 |
| RS_10_7 | BnaA02g30710.1D2 | BnaC02g37910.1D2 |
| RS_10_7 | BnaA02g30720.1D2 | BnaC02g37920.1D2 |
| RS_10_7 | BnaA02g30750.1D2 | BnaC02g37950.1D2 |
| RS_10_7 | BnaA02g30770.1D2 | BnaC02g37970.1D2 |
| RS_10_7 | BnaA02g30790.1D2 | BnaC02g38000.1D2 |
| RS_10_7 | BnaA02g30840.1D2 | BnaC02g38040.1D2 |
| RS_10_7 | BnaA02g30940.1D2 | BnaC02g38100.1D2 |
| RS_10_7 | BnaA02g30950.1D2 | BnaC02g38140.1D2 |
| RS_10_7 | BnaA02g31220.1D2 | BnaC02g38350.1D2 |
| RS_10_7 | BnaA02g31320.1D2 | BnaC02g38990.1D2 |
| RS_10_7 | BnaA02g31360.1D2 | BnaC02g39030.1D2 |
| RS_10_7 | BnaA02g31460.1D2 | BnaC02g38490.1D2 |
| RS_10_7 | BnaA02g31480.1D2 | BnaC02g38520.1D2 |
| RS_10_7 | BnaA02g31510.1D2 | BnaC02g38550.1D2 |
| RS_10_7 | BnaA02g31620.1D2 | BnaC02g38650.1D2 |
| RS_10_7 | BnaA02g31680.1D2 | BnaC02g38760.1D2 |
| RS_10_7 | BnaA02g32100.1D2 | BnaC02g38880.1D2 |
| RS_10_7 | BnaA02g32160.1D2 | BnaC02g37710.1D2 |
| RS_10_7 | BnaA02g32180.1D2 | BnaC02g37460.1D2 |
| RS_10_7 | BnaA02g32200.1D2 | BnaC02g37420.1D2 |
| RS_10_7 | BnaA02g32240.1D2 | BnaC02g37370.1D2 |
| RS_10_7 | BnaA02g32250.1D2 | BnaC02g37360.1D2 |
| RS_10_7 | BnaA02g32300.1D2 | BnaC02g39280.1D2 |
| RS_10_7 | BnaA02g32360.1D2 | BnaC02g39350.1D2 |
| RS_10_7 | BnaA02g32370.1D2 | BnaC02g39360.1D2 |
| RS_10_7 | BnaA02g32400.1D2 | BnaC02g38940.1D2 |
| RS_10_7 | BnaA02g32420.1D2 | BnaC02g39440.1D2 |
| RS_10_7 | BnaA02g32450.1D2 | BnaC02g39480.1D2 |
| RS_10_7 | BnaA02g32480.1D2 | BnaC02g39510.1D2 |
| RS_10_7 | BnaA02g32500.1D2 | BnaC02g39530.1D2 |
| RS_10_7 | BnaA02g32660.1D2 | BnaC02g39600.1D2 |
| RS_10_7 | BnaA02g32670.1D2 | BnaC02g39590.1D2 |
| RS_10_7 | BnaA02g32740.1D2 | BnaC02g39970.1D2 |
| RS_10_7 | BnaA02g32760.1D2 | BnaC02g39750.1D2 |
| RS_10_7 | BnaA02g32840.1D2 | BnaC02g39830.1D2 |
| RS_10_7 | BnaA02g32900.1D2 | BnaC02g39920.1D2 |
| RS_10_7 | BnaA02g32920.1D2 | BnaC02g39930.1D2 |
| RS_10_7 | BnaA02g32920.1D2 | BnaC02g41070.1D2 |
| RS_10_7 | BnaA02g32950.1D2 | BnaC02g39400.1D2 |
| RS_10_7 | BnaA02g33410.1D2 | BnaC02g40170.1D2 |
| RS_10_7 | BnaA02g33440.1D2 | BnaC02g40200.1D2 |
| RS_10_7 | BnaA02g33460.1D2 | BnaC02g40230.1D2 |



|         |                  |                  |
|---------|------------------|------------------|
| RS_10_7 | BnaA02g33540.1D2 | BnaC02g40340.1D2 |
| RS_10_7 | BnaA02g33760.1D2 | BnaC02g40520.1D2 |
| RS_10_7 | BnaA02g33780.1D2 | BnaC02g40550.1D2 |
| RS_10_7 | BnaA02g33830.1D2 | BnaC02g40630.1D2 |
| RS_10_7 | BnaA02g33860.1D2 | BnaC02g40680.1D2 |
| RS_10_7 | BnaA02g33970.1D2 | BnaC02g40820.1D2 |
| RS_10_7 | BnaA02g34040.1D2 | BnaC02g40870.1D2 |
| RS_10_7 | BnaA02g34050.1D2 | BnaC02g40870.1D2 |
| RS_10_7 | BnaA02g34130.1D2 | BnaC02g40920.1D2 |
| RS_10_7 | BnaA02g34140.1D2 | BnaC02g40930.1D2 |
| RS_10_7 | BnaA02g34150.1D2 | BnaC02g40940.1D2 |
| RS_10_7 | BnaA02g34190.1D2 | BnaC02g40990.1D2 |
| RS_10_7 | BnaA02g34220.1D2 | BnaC02g41050.1D2 |
| RS_10_7 | BnaA02g34350.1D2 | BnaC02g41510.1D2 |
| RS_10_7 | BnaA02g34350.1D2 | BnaC02g41640.1D2 |
| RS_10_7 | BnaA02g34420.1D2 | BnaC02g41240.1D2 |
| RS_10_7 | BnaA02g34520.1D2 | BnaC02g41410.1D2 |
| RS_10_7 | BnaA02g34570.1D2 | BnaC02g41770.1D2 |
| RS_10_7 | BnaA02g34600.1D2 | BnaC02g41750.1D2 |
| RS_10_7 | BnaA02g34640.1D2 | BnaC02g41650.1D2 |
| RS_10_7 | BnaA02g34760.1D2 | BnaC02g17080.1D2 |
| RS_10_7 | BnaA02g34780.1D2 | BnaC02g17120.1D2 |
| RS_10_7 | BnaA02g34790.1D2 | BnaC02g17130.1D2 |
| RS_10_7 | BnaA02g34810.1D2 | BnaC02g17150.1D2 |
| RS_10_7 | BnaA02g34850.1D2 | BnaC02g41360.1D2 |
| RS_10_7 | BnaA02g34910.1D2 | BnaC02g41470.1D2 |
| RS_10_7 | BnaA02g34980.1D2 | BnaC02g41540.1D2 |
| RS_10_7 | BnaA02g35210.1D2 | BnaC02g17450.1D2 |
| RS_10_7 | BnaA02g35220.1D2 | BnaC02g17430.1D2 |
| RS_10_7 | BnaA02g35260.1D2 | BnaC02g17380.1D2 |
| S_39    | BnaA02g00010.1D2 | BnaC02g00740.1D2 |
| S_39    | BnaA02g00020.1D2 | BnaC02g00730.1D2 |
| S_39    | BnaA02g00030.1D2 | BnaC02g00690.1D2 |
| S_39    | BnaA02g00150.1D2 | BnaC02g00630.1D2 |
| S_39    | BnaA02g00190.1D2 | BnaC02g00590.1D2 |
| S_39    | BnaA02g00190.1D2 | BnaC02g11160.1D2 |
| S_39    | BnaA02g00210.1D2 | BnaC02g00570.1D2 |
| S_39    | BnaA02g00220.1D2 | BnaC02g00560.1D2 |
| S_39    | BnaA02g00290.1D2 | BnaC02g00500.1D2 |
| S_39    | BnaA02g00300.1D2 | BnaC02g00490.1D2 |
| S_39    | BnaA02g00310.1D2 | BnaC02g00480.1D2 |
| S_39    | BnaA02g00320.1D2 | BnaC02g00470.1D2 |
| S_39    | BnaA02g00350.1D2 | BnaC02g00450.1D2 |
| S_39    | BnaA02g00380.1D2 | BnaC02g00410.1D2 |
| S_39    | BnaA02g00420.1D2 | BnaC02g00370.1D2 |
| S_39    | BnaA02g00440.1D2 | BnaC02g00350.1D2 |
| S_39    | BnaA02g00450.1D2 | BnaC02g00340.1D2 |
| S_39    | BnaA02g00490.1D2 | BnaC02g00300.1D2 |
| S_39    | BnaA02g00510.1D2 | BnaC02g00280.1D2 |
| S_39    | BnaA02g00520.1D2 | BnaC02g00270.1D2 |
| S_39    | BnaA02g00550.1D2 | BnaC02g00240.1D2 |

|      |                  |                  |
|------|------------------|------------------|
| S_39 | BnaA02g00560.1D2 | BnaC02g00230.1D2 |
| S_39 | BnaA02g00580.1D2 | BnaC02g00210.1D2 |
| S_39 | BnaA02g00630.1D2 | BnaC02g00110.1D2 |
| S_39 | BnaA02g00670.1D2 | BnaC02g00070.1D2 |
| S_39 | BnaA02g00700.1D2 | BnaC02g00040.1D2 |
| S_39 | BnaA02g00710.1D2 | BnaC02g00030.1D2 |
| S_39 | BnaA02g00940.1D2 | BnaC02g05980.1D2 |
| S_39 | BnaA02g01050.1D2 | BnaC02g06370.1D2 |
| S_39 | BnaA02g01060.1D2 | BnaC02g06380.1D2 |
| S_39 | BnaA02g01070.1D2 | BnaC02g06390.1D2 |
| S_39 | BnaA02g01080.1D2 | BnaC02g06400.1D2 |
| S_39 | BnaA02g01100.1D2 | BnaC02g06420.1D2 |
| S_39 | BnaA02g01120.1D2 | BnaC02g06440.1D2 |
| S_39 | BnaA02g01150.1D2 | BnaC02g06450.1D2 |
| S_39 | BnaA02g01190.1D2 | BnaC02g06470.1D2 |
| S_39 | BnaA02g01230.1D2 | BnaC02g06500.1D2 |
| S_39 | BnaA02g01240.1D2 | BnaC02g06520.1D2 |
| S_39 | BnaA02g01320.1D2 | BnaC02g06610.1D2 |
| S_39 | BnaA02g01340.1D2 | BnaC02g06630.1D2 |
| S_39 | BnaA02g01360.1D2 | BnaC02g06650.1D2 |
| S_39 | BnaA02g01370.1D2 | BnaC02g06660.1D2 |
| S_39 | BnaA02g01380.1D2 | BnaC02g06670.1D2 |
| S_39 | BnaA02g01390.1D2 | BnaC02g06680.1D2 |
| S_39 | BnaA02g01550.1D2 | BnaC02g06850.1D2 |
| S_39 | BnaA02g01550.1D2 | BnaC02g06860.1D2 |
| S_39 | BnaA02g01560.1D2 | BnaC02g06850.1D2 |
| S_39 | BnaA02g01560.1D2 | BnaC02g06860.1D2 |
| S_39 | BnaA02g01570.1D2 | BnaC02g06870.1D2 |
| S_39 | BnaA02g01590.1D2 | BnaC02g06890.1D2 |
| S_39 | BnaA02g01600.1D2 | BnaC02g06900.1D2 |
| S_39 | BnaA02g01610.1D2 | BnaC02g06910.1D2 |
| S_39 | BnaA02g01620.1D2 | BnaC02g06920.1D2 |
| S_39 | BnaA02g01630.1D2 | BnaC02g06930.1D2 |
| S_39 | BnaA02g01650.1D2 | BnaC02g06950.1D2 |
| S_39 | BnaA02g01660.1D2 | BnaC02g06960.1D2 |
| S_39 | BnaA02g01690.1D2 | BnaC02g06990.1D2 |
| S_39 | BnaA02g01700.1D2 | BnaC02g07000.1D2 |
| S_39 | BnaA02g01720.1D2 | BnaC02g07030.1D2 |
| S_39 | BnaA02g01770.1D2 | BnaC02g07090.1D2 |
| S_39 | BnaA02g01820.1D2 | BnaC02g07140.1D2 |
| S_39 | BnaA02g01840.1D2 | BnaC02g07150.1D2 |
| S_39 | BnaA02g01870.1D2 | BnaC02g07180.1D2 |
| S_39 | BnaA02g01880.1D2 | BnaC02g07190.1D2 |
| S_39 | BnaA02g01890.1D2 | BnaC02g07200.1D2 |
| S_39 | BnaA02g01900.1D2 | BnaC02g07210.1D2 |
| S_39 | BnaA02g01950.1D2 | BnaC02g07270.1D2 |
| S_39 | BnaA02g01960.1D2 | BnaC02g07280.1D2 |
| S_39 | BnaA02g01970.1D2 | BnaC02g07290.1D2 |
| S_39 | BnaA02g01980.1D2 | BnaC02g07300.1D2 |
| S_39 | BnaA02g01990.1D2 | BnaC02g07310.1D2 |
| S_39 | BnaA02g02000.1D2 | BnaC02g07320.1D2 |

|      |                  |                  |
|------|------------------|------------------|
| S_39 | BnaA02g02080.1D2 | BnaC02g07420.1D2 |
| S_39 | BnaA02g02090.1D2 | BnaC02g07440.1D2 |
| S_39 | BnaA02g02100.1D2 | BnaC02g07520.1D2 |
| S_39 | BnaA02g02110.1D2 | BnaC02g07530.1D2 |
| S_39 | BnaA02g02120.1D2 | BnaC02g07540.1D2 |
| S_39 | BnaA02g02140.1D2 | BnaC02g07590.1D2 |
| S_39 | BnaA02g02150.1D2 | BnaC02g07600.1D2 |
| S_39 | BnaA02g02190.1D2 | BnaC02g07660.1D2 |
| S_39 | BnaA02g02250.1D2 | BnaC02g07720.1D2 |
| S_39 | BnaA02g02270.1D2 | BnaC02g07740.1D2 |
| S_39 | BnaA02g02280.1D2 | BnaC02g07750.1D2 |
| S_39 | BnaA02g02310.1D2 | BnaC02g07780.1D2 |
| S_39 | BnaA02g02320.1D2 | BnaC02g07790.1D2 |
| S_39 | BnaA02g02340.1D2 | BnaC02g07800.1D2 |
| S_39 | BnaA02g02350.1D2 | BnaC02g07810.1D2 |
| S_39 | BnaA02g02390.1D2 | BnaC02g07850.1D2 |
| S_39 | BnaA02g02400.1D2 | BnaC02g07860.1D2 |
| S_39 | BnaA02g02410.1D2 | BnaC02g07870.1D2 |
| S_39 | BnaA02g02500.1D2 | BnaC02g07920.1D2 |
| S_39 | BnaA02g02520.1D2 | BnaC02g07940.1D2 |
| S_39 | BnaA02g02680.1D2 | BnaC02g08150.1D2 |
| S_39 | BnaA02g02730.1D2 | BnaC02g08200.1D2 |
| S_39 | BnaA02g02740.1D2 | BnaC02g08210.1D2 |
| S_39 | BnaA02g02820.1D2 | BnaC02g08290.1D2 |
| S_39 | BnaA02g02870.1D2 | BnaC02g08340.1D2 |
| S_39 | BnaA02g02880.1D2 | BnaC02g08350.1D2 |
| S_39 | BnaA02g02910.1D2 | BnaC02g08380.1D2 |
| S_39 | BnaA02g02990.1D2 | BnaC02g08580.1D2 |
| S_39 | BnaA02g03020.1D2 | BnaC02g08600.1D2 |
| S_39 | BnaA02g03050.1D2 | BnaC02g08630.1D2 |
| S_39 | BnaA02g03080.1D2 | BnaC02g08660.1D2 |
| S_39 | BnaA02g03090.1D2 | BnaC02g08680.1D2 |
| S_39 | BnaA02g03100.1D2 | BnaC02g08690.1D2 |
| S_39 | BnaA02g03110.1D2 | BnaC02g08700.1D2 |
| S_39 | BnaA02g03150.1D2 | BnaC02g08720.1D2 |
| S_39 | BnaA02g03150.1D2 | BnaC02g08740.1D2 |
| S_39 | BnaA02g03160.1D2 | BnaC02g08720.1D2 |
| S_39 | BnaA02g03160.1D2 | BnaC02g08740.1D2 |
| S_39 | BnaA02g03170.1D2 | BnaC02g08750.1D2 |
| S_39 | BnaA02g03210.1D2 | BnaC02g08800.1D2 |
| S_39 | BnaA02g03260.1D2 | BnaC02g08850.1D2 |
| S_39 | BnaA02g03270.1D2 | BnaC02g08860.1D2 |
| S_39 | BnaA02g03280.1D2 | BnaC02g08870.1D2 |
| S_39 | BnaA02g03300.1D2 | BnaC02g08890.1D2 |
| S_39 | BnaA02g03480.1D2 | BnaC02g09150.1D2 |
| S_39 | BnaA02g03490.1D2 | BnaC02g09160.1D2 |
| S_39 | BnaA02g03500.1D2 | BnaC02g09170.1D2 |
| S_39 | BnaA02g03690.1D2 | BnaC02g09420.1D2 |
| S_39 | BnaA02g03700.1D2 | BnaC02g09430.1D2 |
| S_39 | BnaA02g03810.1D2 | BnaC02g09830.1D2 |
| S_39 | BnaA02g03920.1D2 | BnaC02g08530.1D2 |

|      |                  |                  |
|------|------------------|------------------|
| S_39 | BnaA02g03950.1D2 | BnaC02g06190.1D2 |
| S_39 | BnaA02g04000.1D2 | BnaC02g06150.1D2 |
| S_39 | BnaA02g04030.1D2 | BnaC02g06120.1D2 |
| S_39 | BnaA02g04040.1D2 | BnaC02g06110.1D2 |
| S_39 | BnaA02g04110.1D2 | BnaC02g00150.1D2 |
| S_39 | BnaA02g04120.1D2 | BnaC02g00140.1D2 |
| S_39 | BnaA02g04310.1D2 | BnaC02g06280.1D2 |
| S_39 | BnaA02g04470.1D2 | BnaC02g09270.1D2 |
| S_39 | BnaA02g04780.1D2 | BnaC02g09490.1D2 |
| S_39 | BnaA02g04790.1D2 | BnaC02g09470.1D2 |
| S_39 | BnaA02g04790.1D2 | BnaC02g09510.1D2 |
| S_39 | BnaA02g04820.1D2 | BnaC02g09470.1D2 |
| S_39 | BnaA02g04820.1D2 | BnaC02g09510.1D2 |
| S_39 | BnaA02g04820.1D2 | BnaC02g09520.1D2 |
| S_39 | BnaA02g04820.1D2 | BnaC02g09550.1D2 |
| S_39 | BnaA02g04870.1D2 | BnaC02g09610.1D2 |
| S_39 | BnaA02g05160.1D2 | BnaC02g10130.1D2 |
| S_39 | BnaA02g05170.1D2 | BnaC02g10140.1D2 |
| S_39 | BnaA02g05210.1D2 | BnaC02g10170.1D2 |
| S_39 | BnaA02g05220.1D2 | BnaC02g10180.1D2 |
| S_39 | BnaA02g05230.1D2 | BnaC02g10190.1D2 |
| S_39 | BnaA02g05240.1D2 | BnaC02g10200.1D2 |
| S_39 | BnaA02g05260.1D2 | BnaC02g10190.1D2 |
| S_39 | BnaA02g05370.1D2 | BnaC02g10270.1D2 |
| S_39 | BnaA02g05380.1D2 | BnaC02g10280.1D2 |
| S_39 | BnaA02g05420.1D2 | BnaC02g10360.1D2 |
| S_39 | BnaA02g05450.1D2 | BnaC02g10400.1D2 |
| S_39 | BnaA02g05470.1D2 | BnaC02g10410.1D2 |
| S_39 | BnaA02g05520.1D2 | BnaC02g10470.1D2 |
| S_39 | BnaA02g05570.1D2 | BnaC02g10500.1D2 |
| S_39 | BnaA02g05640.1D2 | BnaC02g10600.1D2 |
| S_39 | BnaA02g05730.1D2 | BnaC02g10700.1D2 |
| S_39 | BnaA02g05750.1D2 | BnaC02g10720.1D2 |
| S_39 | BnaA02g06690.1D2 | BnaC02g10790.1D2 |
| S_39 | BnaA02g06700.1D2 | BnaC02g10800.1D2 |
| S_39 | BnaA02g06710.1D2 | BnaC02g10810.1D2 |
| S_39 | BnaA02g06740.1D2 | BnaC02g10860.1D2 |
| S_39 | BnaA02g06800.1D2 | BnaC02g10900.1D2 |
| S_39 | BnaA02g06820.1D2 | BnaC02g10920.1D2 |
| S_39 | BnaA02g06840.1D2 | BnaC02g10940.1D2 |
| S_39 | BnaA02g06890.1D2 | BnaC02g15180.1D2 |
| S_39 | BnaA02g06910.1D2 | BnaC02g15160.1D2 |
| S_39 | BnaA02g07850.1D2 | BnaC02g15480.1D2 |
| S_39 | BnaA02g08000.1D2 | BnaC02g11110.1D2 |
| S_39 | BnaA02g08010.1D2 | BnaC02g11110.1D2 |
| S_39 | BnaA02g08040.1D2 | BnaC02g11140.1D2 |
| S_39 | BnaA02g08050.1D2 | BnaC02g11150.1D2 |
| S_39 | BnaA02g08060.1D2 | BnaC02g00590.1D2 |
| S_39 | BnaA02g08060.1D2 | BnaC02g11160.1D2 |
| S_39 | BnaA02g08100.1D2 | BnaC02g11210.1D2 |
| S_39 | BnaA02g08140.1D2 | BnaC02g11290.1D2 |

|      |                  |                  |
|------|------------------|------------------|
| S_39 | BnaA02g08160.1D2 | BnaC02g11310.1D2 |
| S_39 | BnaA02g08230.1D2 | BnaC02g11420.1D2 |
| S_39 | BnaA02g08330.1D2 | BnaC02g11520.1D2 |
| S_39 | BnaA02g08360.1D2 | BnaC02g11550.1D2 |
| S_39 | BnaA02g08460.1D2 | BnaC02g11670.1D2 |
| S_39 | BnaA02g08470.1D2 | BnaC02g12400.1D2 |
| S_39 | BnaA02g08530.1D2 | BnaC02g11700.1D2 |
| S_39 | BnaA02g08560.1D2 | BnaC02g11750.1D2 |
| S_39 | BnaA02g08630.1D2 | BnaC02g11810.1D2 |
| S_39 | BnaA02g08650.1D2 | BnaC02g11820.1D2 |
| S_39 | BnaA02g08670.1D2 | BnaC02g11840.1D2 |
| S_39 | BnaA02g08710.1D2 | BnaC02g11870.1D2 |
| S_39 | BnaA02g16940.1D2 | BnaC02g06790.1D2 |
| S_39 | BnaA02g33390.1D2 | BnaC02g40120.1D2 |
| S_39 | BnaA02g33410.1D2 | BnaC02g40170.1D2 |
| S_39 | BnaA02g33440.1D2 | BnaC02g40200.1D2 |
| S_39 | BnaA02g33450.1D2 | BnaC02g40210.1D2 |
| S_39 | BnaA02g33460.1D2 | BnaC02g40230.1D2 |
| S_39 | BnaA02g33750.1D2 | BnaC02g40900.1D2 |
| S_39 | BnaA02g33760.1D2 | BnaC02g40520.1D2 |
| S_39 | BnaA02g33780.1D2 | BnaC02g40550.1D2 |
| S_39 | BnaA02g33830.1D2 | BnaC02g40630.1D2 |
| S_39 | BnaA02g33840.1D2 | BnaC02g40640.1D2 |
| S_39 | BnaA02g33850.1D2 | BnaC02g40650.1D2 |
| S_39 | BnaA02g33860.1D2 | BnaC02g40680.1D2 |
| S_39 | BnaA02g33870.1D2 | BnaC02g40690.1D2 |
| S_39 | BnaA02g33950.1D2 | BnaC02g40800.1D2 |
| S_39 | BnaA02g33970.1D2 | BnaC02g40820.1D2 |
| S_39 | BnaA02g33990.1D2 | BnaC02g40840.1D2 |
| S_39 | BnaA02g34000.1D2 | BnaC02g40850.1D2 |
| S_39 | BnaA02g34040.1D2 | BnaC02g40870.1D2 |
| S_39 | BnaA02g34050.1D2 | BnaC02g40870.1D2 |
| S_39 | BnaA02g34130.1D2 | BnaC02g40920.1D2 |
| S_39 | BnaA02g34140.1D2 | BnaC02g40930.1D2 |
| S_39 | BnaA02g34150.1D2 | BnaC02g40940.1D2 |
| S_39 | BnaA02g34190.1D2 | BnaC02g40990.1D2 |
| S_39 | BnaA02g34220.1D2 | BnaC02g41050.1D2 |
| S_39 | BnaA02g34240.1D2 | BnaC02g41060.1D2 |
| S_39 | BnaA02g34250.1D2 | BnaC02g41080.1D2 |
| S_39 | BnaA02g34300.1D2 | BnaC02g41130.1D2 |
| S_39 | BnaA02g34330.1D2 | BnaC02g41150.1D2 |
| S_39 | BnaA02g34380.1D2 | BnaC02g41180.1D2 |
| S_39 | BnaA02g34400.1D2 | BnaC02g41220.1D2 |
| S_39 | BnaA02g34420.1D2 | BnaC02g41240.1D2 |
| S_39 | BnaA02g34570.1D2 | BnaC02g41770.1D2 |
| S_39 | BnaA02g34600.1D2 | BnaC02g41750.1D2 |
| S_39 | BnaA02g34790.1D2 | BnaC02g17130.1D2 |
| S_39 | BnaA02g34810.1D2 | BnaC02g17150.1D2 |
| S_39 | BnaA02g34900.1D2 | BnaC02g41460.1D2 |
| S_39 | BnaA02g34910.1D2 | BnaC02g41470.1D2 |
| S_39 | BnaA02g34980.1D2 | BnaC02g41540.1D2 |

|       |                  |                  |
|-------|------------------|------------------|
| S_39  | BnaA02g35210.1D2 | BnaC02g17450.1D2 |
| S_39  | BnaA02g35220.1D2 | BnaC02g17430.1D2 |
| H165  | BnaA02g04850.1D2 | BnaC02g09590.1D2 |
| H165  | BnaA02g27240.1D2 | BnaC02g34050.1D2 |
| CRY_1 | BnaA02g04830.1D2 | BnaC02g33250.1D2 |
| CRY_1 | BnaA02g17090.1D2 | BnaC02g23100.1D2 |
| CRY_1 | BnaA02g17170.1D2 | BnaC02g22000.1D2 |
| CRY_1 | BnaA02g17210.1D2 | BnaC02g22050.1D2 |
| CRY_1 | BnaA02g17260.1D2 | BnaC02g22130.1D2 |
| CRY_1 | BnaA02g17300.1D2 | BnaC02g22510.1D2 |
| CRY_1 | BnaA02g17370.1D2 | BnaC02g22720.1D2 |
| CRY_1 | BnaA02g17480.1D2 | BnaC02g22300.1D2 |
| CRY_1 | BnaA02g17520.1D2 | BnaC02g22370.1D2 |
| CRY_1 | BnaA02g17540.1D2 | BnaC02g22400.1D2 |
| CRY_1 | BnaA02g17830.1D2 | BnaC02g23390.1D2 |
| CRY_1 | BnaA02g17990.1D2 | BnaC02g22870.1D2 |
| CRY_1 | BnaA02g18140.1D2 | BnaC02g25080.1D2 |
| CRY_1 | BnaA02g18240.1D2 | BnaC02g24570.1D2 |
| CRY_1 | BnaA02g18310.1D2 | BnaC02g24460.1D2 |
| CRY_1 | BnaA02g18390.1D2 | BnaC02g24380.1D2 |
| CRY_1 | BnaA02g18480.1D2 | BnaC02g24910.1D2 |
| CRY_1 | BnaA02g18490.1D2 | BnaC02g24930.1D2 |
| CRY_1 | BnaA02g18500.1D2 | BnaC02g24940.1D2 |
| CRY_1 | BnaA02g18520.1D2 | BnaC02g24960.1D2 |
| CRY_1 | BnaA02g18590.1D2 | BnaC02g24660.1D2 |
| CRY_1 | BnaA02g18870.1D2 | BnaC02g24890.1D2 |
| CRY_1 | BnaA02g19080.1D2 | BnaC02g26380.1D2 |
| CRY_1 | BnaA02g19310.1D2 | BnaC02g22770.1D2 |
| CRY_1 | BnaA02g19390.1D2 | BnaC02g23620.1D2 |
| CRY_1 | BnaA02g19470.1D2 | BnaC02g25240.1D2 |
| CRY_1 | BnaA02g19620.1D2 | BnaC02g25430.1D2 |
| CRY_1 | BnaA02g19660.1D2 | BnaC02g25490.1D2 |
| CRY_1 | BnaA02g19810.1D2 | BnaC02g25680.1D2 |
| CRY_1 | BnaA02g19820.1D2 | BnaC02g25690.1D2 |
| CRY_1 | BnaA02g19900.1D2 | BnaC02g25820.1D2 |
| CRY_1 | BnaA02g20060.1D2 | BnaC02g24210.1D2 |
| CRY_1 | BnaA02g20270.1D2 | BnaC02g22230.1D2 |
| CRY_1 | BnaA02g20340.1D2 | BnaC02g24000.1D2 |
| CRY_1 | BnaA02g20990.1D2 | BnaC02g23940.1D2 |
| CRY_1 | BnaA02g21430.1D2 | BnaC02g27640.1D2 |
| CRY_1 | BnaA02g21570.1D2 | BnaC02g29600.1D2 |
| CRY_1 | BnaA02g22040.1D2 | BnaC02g24140.1D2 |
| CRY_1 | BnaA02g22170.1D2 | BnaC02g28790.1D2 |
| CRY_1 | BnaA02g22230.1D2 | BnaC02g30250.1D2 |
| CRY_1 | BnaA02g22240.1D2 | BnaC02g27720.1D2 |
| CRY_1 | BnaA02g22570.1D2 | BnaC02g31350.1D2 |
| CRY_1 | BnaA02g22600.1D2 | BnaC02g31300.1D2 |
| CRY_1 | BnaA02g22610.1D2 | BnaC02g31290.1D2 |
| CRY_1 | BnaA02g22680.1D2 | BnaC02g31210.1D2 |
| CRY_1 | BnaA02g22700.1D2 | BnaC02g29740.1D2 |
| CRY_1 | BnaA02g22790.1D2 | BnaC02g28120.1D2 |

|       |                  |                  |
|-------|------------------|------------------|
| CRY_1 | BnaA02g22800.1D2 | BnaC02g28130.1D2 |
| CRY_1 | BnaA02g22810.1D2 | BnaC02g28150.1D2 |
| CRY_1 | BnaA02g22860.1D2 | BnaC02g28240.1D2 |
| CRY_1 | BnaA02g23020.1D2 | BnaC02g29620.1D2 |
| CRY_1 | BnaA02g23030.1D2 | BnaC02g30140.1D2 |
| CRY_1 | BnaA02g23180.1D2 | BnaC02g29000.1D2 |
| CRY_1 | BnaA02g23290.1D2 | BnaC02g29140.1D2 |
| CRY_1 | BnaA02g23380.1D2 | BnaC02g29330.1D2 |
| CRY_1 | BnaA02g23430.1D2 | BnaC02g29390.1D2 |
| CRY_1 | BnaA02g23810.1D2 | BnaC02g28530.1D2 |
| CRY_1 | BnaA02g24400.1D2 | BnaC02g30340.1D2 |
| CRY_1 | BnaA02g24500.1D2 | BnaC02g30420.1D2 |
| CRY_1 | BnaA02g24520.1D2 | BnaC02g30470.1D2 |
| CRY_1 | BnaA02g24570.1D2 | BnaC02g30560.1D2 |
| CRY_1 | BnaA02g24660.1D2 | BnaC02g30580.1D2 |
| CRY_1 | BnaA02g24690.1D2 | BnaC02g30610.1D2 |
| CRY_1 | BnaA02g24740.1D2 | BnaC02g30660.1D2 |
| CRY_1 | BnaA02g24780.1D2 | BnaC02g30670.1D2 |
| CRY_1 | BnaA02g24910.1D2 | BnaC02g31710.1D2 |
| CRY_1 | BnaA02g25020.1D2 | BnaC02g31380.1D2 |
| CRY_1 | BnaA02g25040.1D2 | BnaC02g30790.1D2 |
| CRY_1 | BnaA02g25070.1D2 | BnaC02g30770.1D2 |
| CRY_1 | BnaA02g25210.1D2 | BnaC02g30950.1D2 |
| CRY_1 | BnaA02g25240.1D2 | BnaC02g32010.1D2 |
| CRY_1 | BnaA02g25270.1D2 | BnaC02g32030.1D2 |
| CRY_1 | BnaA02g25460.1D2 | BnaC02g31570.1D2 |
| CRY_1 | BnaA02g25550.1D2 | BnaC02g32040.1D2 |
| CRY_1 | BnaA02g25610.1D2 | BnaC02g32100.1D2 |
| CRY_1 | BnaA02g25630.1D2 | BnaC02g32120.1D2 |
| CRY_1 | BnaA02g25640.1D2 | BnaC02g32130.1D2 |
| CRY_1 | BnaA02g25650.1D2 | BnaC02g32140.1D2 |
| CRY_1 | BnaA02g25780.1D2 | BnaC02g31900.1D2 |
| CRY_1 | BnaA02g25800.1D2 | BnaC02g22690.1D2 |
| CRY_1 | BnaA02g25910.1D2 | BnaC02g33340.1D2 |
| CRY_1 | BnaA02g26060.1D2 | BnaC02g33020.1D2 |
| CRY_1 | BnaA02g26470.1D2 | BnaC02g33530.1D2 |
| CRY_1 | BnaA02g26730.1D2 | BnaC02g32840.1D2 |
| CRY_1 | BnaA02g26780.1D2 | BnaC02g32590.1D2 |
| CRY_1 | BnaA02g26830.1D2 | BnaC02g32510.1D2 |
| CRY_1 | BnaA02g26850.1D2 | BnaC02g32480.1D2 |
| CRY_1 | BnaA02g27030.1D2 | BnaC02g32240.1D2 |
| CRY_1 | BnaA02g27050.1D2 | BnaC02g33860.1D2 |
| CRY_1 | BnaA02g27090.1D2 | BnaC02g33910.1D2 |
| CRY_1 | BnaA02g27110.1D2 | BnaC02g33950.1D2 |
| CRY_1 | BnaA02g27210.1D2 | BnaC02g33990.1D2 |
| CRY_1 | BnaA02g27240.1D2 | BnaC02g34050.1D2 |
| CRY_1 | BnaA02g27280.1D2 | BnaC02g34080.1D2 |
| CRY_1 | BnaA02g27290.1D2 | BnaC02g34130.1D2 |
| CRY_1 | BnaA02g27300.1D2 | BnaC02g34140.1D2 |
| CRY_1 | BnaA02g27400.1D2 | BnaC02g34250.1D2 |
| CRY_1 | BnaA02g27410.1D2 | BnaC02g34260.1D2 |

|       |                  |                  |
|-------|------------------|------------------|
| CRY_1 | BnaA02g27420.1D2 | BnaC02g34270.1D2 |
| CRY_1 | BnaA02g27430.1D2 | BnaC02g34280.1D2 |
| CRY_1 | BnaA02g27450.1D2 | BnaC02g34300.1D2 |
| CRY_1 | BnaA02g27490.1D2 | BnaC02g34340.1D2 |
| CRY_1 | BnaA02g27500.1D2 | BnaC02g34350.1D2 |
| CRY_1 | BnaA02g27550.1D2 | BnaC02g35010.1D2 |
| CRY_1 | BnaA02g27680.1D2 | BnaC02g33740.1D2 |
| CRY_1 | BnaA02g27790.1D2 | BnaC02g34410.1D2 |
| CRY_1 | BnaA02g27850.1D2 | BnaC02g34570.1D2 |
| CRY_1 | BnaA02g27870.1D2 | BnaC02g34590.1D2 |
| CRY_1 | BnaA02g27900.1D2 | BnaC02g34620.1D2 |
| CRY_1 | BnaA02g28040.1D2 | BnaC02g34680.1D2 |
| CRY_1 | BnaA02g28080.1D2 | BnaC02g34730.1D2 |
| CRY_1 | BnaA02g28160.1D2 | BnaC02g34780.1D2 |
| CRY_1 | BnaA02g28400.1D2 | BnaC02g36120.1D2 |
| CRY_1 | BnaA02g28460.1D2 | BnaC02g36170.1D2 |
| CRY_1 | BnaA02g28530.1D2 | BnaC02g35070.1D2 |
| CRY_1 | BnaA02g28550.1D2 | BnaC02g35090.1D2 |
| CRY_1 | BnaA02g28590.1D2 | BnaC02g35220.1D2 |
| CRY_1 | BnaA02g28600.1D2 | BnaC02g35230.1D2 |
| CRY_1 | BnaA02g28890.1D2 | BnaC02g35430.1D2 |
| CRY_1 | BnaA02g28910.1D2 | BnaC02g35460.1D2 |
| CRY_1 | BnaA02g28950.1D2 | BnaC02g35490.1D2 |
| CRY_1 | BnaA02g29090.1D2 | BnaC02g35640.1D2 |
| CRY_1 | BnaA02g29110.1D2 | BnaC02g35650.1D2 |
| CRY_1 | BnaA02g29120.1D2 | BnaC02g35660.1D2 |
| CRY_1 | BnaA02g29210.1D2 | BnaC02g35790.1D2 |
| CRY_1 | BnaA02g29320.1D2 | BnaC02g35930.1D2 |
| CRY_1 | BnaA02g29520.1D2 | BnaC02g36300.1D2 |
| CRY_1 | BnaA02g29530.1D2 | BnaC02g36330.1D2 |
| CRY_1 | BnaA02g29640.1D2 | BnaC02g36440.1D2 |
| CRY_1 | BnaA02g29650.1D2 | BnaC02g36450.1D2 |
| CRY_1 | BnaA02g29670.1D2 | BnaC02g36470.1D2 |
| CRY_1 | BnaA02g29690.1D2 | BnaC02g36510.1D2 |
| CRY_1 | BnaA02g29700.1D2 | BnaC02g36520.1D2 |
| CRY_1 | BnaA02g29720.1D2 | BnaC02g36560.1D2 |
| CRY_1 | BnaA02g29730.1D2 | BnaC02g36570.1D2 |
| CRY_1 | BnaA02g29920.1D2 | BnaC02g36770.1D2 |
| CRY_1 | BnaA02g30010.1D2 | BnaC02g36830.1D2 |
| CRY_1 | BnaA02g30080.1D2 | BnaC02g36870.1D2 |
| CRY_1 | BnaA02g30220.1D2 | BnaC02g36030.1D2 |
| CRY_1 | BnaA02g30240.1D2 | BnaC02g37020.1D2 |
| CRY_1 | BnaA02g30290.1D2 | BnaC02g37060.1D2 |
| CRY_1 | BnaA02g30370.1D2 | BnaC02g37090.1D2 |
| CRY_1 | BnaA02g30600.1D2 | BnaC02g37810.1D2 |
| CRY_1 | BnaA02g30680.1D2 | BnaC02g37880.1D2 |
| CRY_1 | BnaA02g30700.1D2 | BnaC02g37900.1D2 |
| CRY_1 | BnaA02g30720.1D2 | BnaC02g37920.1D2 |
| CRY_1 | BnaA02g30750.1D2 | BnaC02g37950.1D2 |
| CRY_1 | BnaA02g30770.1D2 | BnaC02g37970.1D2 |
| CRY_1 | BnaA02g30790.1D2 | BnaC02g38000.1D2 |



|       |                  |                  |
|-------|------------------|------------------|
| CRY_1 | BnaA02g30840.1D2 | BnaC02g38040.1D2 |
| CRY_1 | BnaA02g30940.1D2 | BnaC02g38100.1D2 |
| CRY_1 | BnaA02g31140.1D2 | BnaC02g38300.1D2 |
| CRY_1 | BnaA02g31510.1D2 | BnaC02g38550.1D2 |
| CRY_1 | BnaA02g32100.1D2 | BnaC02g38880.1D2 |
| CRY_1 | BnaA02g32240.1D2 | BnaC02g37370.1D2 |
| CRY_1 | BnaA02g32250.1D2 | BnaC02g37360.1D2 |
| CRY_1 | BnaA02g32480.1D2 | BnaC02g39510.1D2 |
| CRY_1 | BnaA02g32670.1D2 | BnaC02g39590.1D2 |
| CRY_1 | BnaA02g32710.1D2 | BnaC02g39700.1D2 |
| CRY_1 | BnaA02g33760.1D2 | BnaC02g40520.1D2 |
| CRY_1 | BnaA02g33780.1D2 | BnaC02g40550.1D2 |
| CRY_1 | BnaA02g34040.1D2 | BnaC02g40870.1D2 |
| CRY_1 | BnaA02g34130.1D2 | BnaC02g40920.1D2 |
| CRY_1 | BnaA02g34300.1D2 | BnaC02g41130.1D2 |
| CRY_1 | BnaA02g34410.1D2 | BnaC02g41230.1D2 |
| CRY_1 | BnaA02g34520.1D2 | BnaC02g41410.1D2 |
| CRY_1 | BnaA02g34570.1D2 | BnaC02g41770.1D2 |
| CRY_1 | BnaA02g34600.1D2 | BnaC02g41750.1D2 |
| CRY_1 | BnaA02g34640.1D2 | BnaC02g41650.1D2 |
| CRY_1 | BnaA02g34760.1D2 | BnaC02g17080.1D2 |
| CRY_1 | BnaA02g34790.1D2 | BnaC02g17130.1D2 |
| CRY_1 | BnaA02g34810.1D2 | BnaC02g17150.1D2 |
| CRY_1 | BnaA02g34850.1D2 | BnaC02g41360.1D2 |
| CRY_1 | BnaA02g34890.1D2 | BnaC02g41450.1D2 |
| CRY_1 | BnaA02g34910.1D2 | BnaC02g41470.1D2 |
| CRY_1 | BnaA02g34980.1D2 | BnaC02g41540.1D2 |
| CRY_1 | BnaA02g35010.1D2 | BnaC02g41560.1D2 |
| CRY_1 | BnaA02g35150.1D2 | BnaC02g41700.1D2 |

**List of HE genes (A04 to C04)**

| <b>Accession</b> | <b>Lost gene</b> | <b>Duplicated HE gene</b> |
|------------------|------------------|---------------------------|
| H165             | BnaA04g20610.1D2 | BnaC04g40490.1D2          |
| H165             | BnaA04g20660.1D2 | BnaC04g40540.1D2          |
| H165             | BnaA04g20700.1D2 | BnaC04g40580.1D2          |
| H165             | BnaA04g20720.1D2 | BnaC04g40600.1D2          |
| H165             | BnaA04g20830.1D2 | BnaC04g40850.1D2          |
| H165             | BnaA04g20860.1D2 | BnaC04g40880.1D2          |
| H165             | BnaA04g20920.1D2 | BnaC04g40940.1D2          |
| H165             | BnaA04g20930.1D2 | BnaC04g40950.1D2          |
| H165             | BnaA04g20970.1D2 | BnaC04g41000.1D2          |
| H165             | BnaA04g21040.1D2 | BnaC04g41100.1D2          |
| H165             | BnaA04g21080.1D2 | BnaC04g41140.1D2          |
| H165             | BnaA04g21090.1D2 | BnaC04g41150.1D2          |
| H165             | BnaA04g21170.1D2 | BnaC04g42620.1D2          |
| H165             | BnaA04g21180.1D2 | BnaC04g42630.1D2          |
| H165             | BnaA04g21250.1D2 | BnaC04g42730.1D2          |
| H165             | BnaA04g21270.1D2 | BnaC04g41190.1D2          |
| H165             | BnaA04g21280.1D2 | BnaC04g41200.1D2          |
| H165             | BnaA04g21330.1D2 | BnaC04g41260.1D2          |
| H165             | BnaA04g21380.1D2 | BnaC04g41310.1D2          |

|      |                  |                  |
|------|------------------|------------------|
| H165 | BnaA04g21730.1D2 | BnaC04g40740.1D2 |
| H165 | BnaA04g21740.1D2 | BnaC04g40770.1D2 |
| H165 | BnaA04g21750.1D2 | BnaC04g40780.1D2 |
| H165 | BnaA04g21760.1D2 | BnaC04g40800.1D2 |
| H165 | BnaA04g21780.1D2 | BnaC04g40800.1D2 |
| H165 | BnaA04g21790.1D2 | BnaC04g40800.1D2 |
| H165 | BnaA04g21810.1D2 | BnaC04g40710.1D2 |
| H165 | BnaA04g21820.1D2 | BnaC04g40700.1D2 |
| H165 | BnaA04g21840.1D2 | BnaC04g40690.1D2 |
| H165 | BnaA04g21850.1D2 | BnaC04g40680.1D2 |
| H165 | BnaA04g21980.1D2 | BnaC04g41980.1D2 |
| H165 | BnaA04g22000.1D2 | BnaC04g41960.1D2 |
| H165 | BnaA04g22080.1D2 | BnaC04g42520.1D2 |
| H165 | BnaA04g22110.1D2 | BnaC04g42550.1D2 |
| H165 | BnaA04g22170.1D2 | BnaC04g41880.1D2 |
| H165 | BnaA04g22190.1D2 | BnaC04g41870.1D2 |
| H165 | BnaA04g22230.1D2 | BnaC04g41830.1D2 |
| H165 | BnaA04g22260.1D2 | BnaC04g41800.1D2 |
| H165 | BnaA04g22270.1D2 | BnaC04g41780.1D2 |
| H165 | BnaA04g22280.1D2 | BnaC04g41780.1D2 |
| H165 | BnaA04g22290.1D2 | BnaC04g41760.1D2 |
| H165 | BnaA04g22350.1D2 | BnaC04g42560.1D2 |
| H165 | BnaA04g22370.1D2 | BnaC04g41680.1D2 |
| H165 | BnaA04g22490.1D2 | BnaC04g41570.1D2 |
| H165 | BnaA04g22690.1D2 | BnaC04g42250.1D2 |
| H165 | BnaA04g22720.1D2 | BnaC04g42280.1D2 |
| H165 | BnaA04g22760.1D2 | BnaC04g42330.1D2 |
| H165 | BnaA04g23000.1D2 | BnaC04g42440.1D2 |
| H165 | BnaA04g23110.1D2 | BnaC04g43010.1D2 |
| H165 | BnaA04g23250.1D2 | BnaC04g43200.1D2 |
| H165 | BnaA04g23320.1D2 | BnaC04g43270.1D2 |
| H165 | BnaA04g23390.1D2 | BnaC04g43340.1D2 |
| H165 | BnaA04g23400.1D2 | BnaC04g43350.1D2 |
| H165 | BnaA04g23660.1D2 | BnaC04g42090.1D2 |
| H165 | BnaA04g23680.1D2 | BnaC04g42110.1D2 |
| H165 | BnaA04g23710.1D2 | BnaC04g42760.1D2 |
| H165 | BnaA04g23720.1D2 | BnaC04g42770.1D2 |
| H165 | BnaA04g23730.1D2 | BnaC04g42770.1D2 |
| H165 | BnaA04g23800.1D2 | BnaC04g43640.1D2 |
| H165 | BnaA04g23840.1D2 | BnaC04g43680.1D2 |
| H165 | BnaA04g23850.1D2 | BnaC04g43690.1D2 |
| H165 | BnaA04g23880.1D2 | BnaC04g43720.1D2 |
| H165 | BnaA04g23950.1D2 | BnaC04g02750.1D2 |
| H165 | BnaA04g23950.1D2 | BnaC04g43820.1D2 |
| H165 | BnaA04g24130.1D2 | BnaC04g46010.1D2 |
| H165 | BnaA04g24180.1D2 | BnaC04g46040.1D2 |
| H165 | BnaA04g24200.1D2 | BnaC04g46060.1D2 |
| H165 | BnaA04g24280.1D2 | BnaC04g43990.1D2 |
| H165 | BnaA04g24410.1D2 | BnaC04g44060.1D2 |
| H165 | BnaA04g24420.1D2 | BnaC04g44070.1D2 |
| H165 | BnaA04g24440.1D2 | BnaC04g44100.1D2 |

|      |                  |                  |
|------|------------------|------------------|
| H165 | BnaA04g24450.1D2 | BnaC04g44110.1D2 |
| H165 | BnaA04g24470.1D2 | BnaC04g44140.1D2 |
| H165 | BnaA04g24480.1D2 | BnaC04g44150.1D2 |
| H165 | BnaA04g24680.1D2 | BnaC04g44370.1D2 |
| H165 | BnaA04g24770.1D2 | BnaC04g44460.1D2 |
| H165 | BnaA04g24780.1D2 | BnaC04g44470.1D2 |
| H165 | BnaA04g24830.1D2 | BnaC04g44520.1D2 |
| H165 | BnaA04g24850.1D2 | BnaC04g44540.1D2 |
| H165 | BnaA04g24860.1D2 | BnaC04g44550.1D2 |
| H165 | BnaA04g24880.1D2 | BnaC04g44570.1D2 |
| H165 | BnaA04g24890.1D2 | BnaC04g44580.1D2 |
| H165 | BnaA04g24950.1D2 | BnaC04g44640.1D2 |
| H165 | BnaA04g25000.1D2 | BnaC04g44680.1D2 |
| H165 | BnaA04g25050.1D2 | BnaC04g44730.1D2 |
| H165 | BnaA04g25130.1D2 | BnaC04g44810.1D2 |
| H165 | BnaA04g25290.1D2 | BnaC04g45010.1D2 |
| H165 | BnaA04g25360.1D2 | BnaC04g45120.1D2 |
| H165 | BnaA04g25380.1D2 | BnaC04g45140.1D2 |
| H165 | BnaA04g25580.1D2 | BnaC04g45920.1D2 |
| H165 | BnaA04g25600.1D2 | BnaC04g45930.1D2 |
| H165 | BnaA04g25610.1D2 | BnaC04g45930.1D2 |
| H165 | BnaA04g25650.1D2 | BnaC04g45310.1D2 |
| H165 | BnaA04g25680.1D2 | BnaC04g45350.1D2 |
| H165 | BnaA04g25710.1D2 | BnaC04g45400.1D2 |
| H165 | BnaA04g25740.1D2 | BnaC04g45430.1D2 |
| H165 | BnaA04g25800.1D2 | BnaC04g45490.1D2 |
| H165 | BnaA04g25820.1D2 | BnaC04g45510.1D2 |
| H165 | BnaA04g25860.1D2 | BnaC04g45540.1D2 |
| H165 | BnaA04g25870.1D2 | BnaC04g45550.1D2 |
| H165 | BnaA04g25880.1D2 | BnaC04g45560.1D2 |
| H165 | BnaA04g25940.1D2 | BnaC04g45620.1D2 |
| H165 | BnaA04g25990.1D2 | BnaC04g45680.1D2 |
| H165 | BnaA04g26020.1D2 | BnaC04g45720.1D2 |
| H165 | BnaA04g26040.1D2 | BnaC04g45750.1D2 |
| H165 | BnaA04g26070.1D2 | BnaC04g45770.1D2 |
| H165 | BnaA04g26090.1D2 | BnaC04g45790.1D2 |
| H165 | BnaA04g26200.1D2 | BnaC04g45840.1D2 |
| H165 | BnaA04g26210.1D2 | BnaC04g45830.1D2 |
| H165 | BnaA04g26250.1D2 | BnaC04g46570.1D2 |
| H165 | BnaA04g26270.1D2 | BnaC04g46550.1D2 |
| H165 | BnaA04g26300.1D2 | BnaC04g46500.1D2 |
| H165 | BnaA04g26360.1D2 | BnaC04g46420.1D2 |
| H165 | BnaA04g26390.1D2 | BnaC04g46390.1D2 |
| H165 | BnaA04g26470.1D2 | BnaC04g46310.1D2 |
| H165 | BnaA04g26570.1D2 | BnaC04g46130.1D2 |
| H165 | BnaA04g26690.1D2 | BnaC04g45860.1D2 |

**List of HE genes (A07 to C06)**

| <b>Accession</b> | <b>Lost gene</b> | <b>Duplicated HE gene</b> |
|------------------|------------------|---------------------------|
| R76              | BnaA07g31690.1D2 | BnaC06g31140.1D2          |
| R76              | BnaA07g31750.1D2 | BnaC06g31190.1D2          |

|     |                  |                  |
|-----|------------------|------------------|
| R76 | BnaA07g31930.1D2 | BnaC06g31420.1D2 |
| R76 | BnaA07g31940.1D2 | BnaC06g31430.1D2 |
| R76 | BnaA07g31950.1D2 | BnaC06g31440.1D2 |
| R76 | BnaA07g31960.1D2 | BnaC06g31450.1D2 |
| R76 | BnaA07g31970.1D2 | BnaC06g31460.1D2 |
| R76 | BnaA07g31990.1D2 | BnaC06g31480.1D2 |
| R76 | BnaA07g32010.1D2 | BnaC06g31500.1D2 |
| R76 | BnaA07g32060.1D2 | BnaC06g31870.1D2 |
| R76 | BnaA07g32070.1D2 | BnaC06g31880.1D2 |
| R76 | BnaA07g32100.1D2 | BnaC06g31920.1D2 |
| R76 | BnaA07g32130.1D2 | BnaC06g31950.1D2 |
| R76 | BnaA07g32140.1D2 | BnaC06g31960.1D2 |
| R76 | BnaA07g32200.1D2 | BnaC06g32040.1D2 |
| R76 | BnaA07g32220.1D2 | BnaC06g32020.1D2 |
| R76 | BnaA07g32400.1D2 | BnaC06g32240.1D2 |
| R76 | BnaA07g32680.1D2 | BnaC06g32520.1D2 |
| R76 | BnaA07g32750.1D2 | BnaC06g32580.1D2 |
| R76 | BnaA07g32790.1D2 | BnaC06g32620.1D2 |
| R76 | BnaA07g32810.1D2 | BnaC06g32640.1D2 |
| R76 | BnaA07g33030.1D2 | BnaC06g32900.1D2 |
| R76 | BnaA07g33060.1D2 | BnaC06g32940.1D2 |
| R76 | BnaA07g33210.1D2 | BnaC06g33130.1D2 |
| R76 | BnaA07g33250.1D2 | BnaC06g33150.1D2 |
| R76 | BnaA07g33260.1D2 | BnaC06g33160.1D2 |
| R76 | BnaA07g33270.1D2 | BnaC06g33170.1D2 |
| R76 | BnaA07g33280.1D2 | BnaC06g33180.1D2 |
| R76 | BnaA07g33330.1D2 | BnaC06g33230.1D2 |
| R76 | BnaA07g33340.1D2 | BnaC06g33240.1D2 |
| R76 | BnaA07g33350.1D2 | BnaC06g33250.1D2 |
| R76 | BnaA07g33400.1D2 | BnaC06g33320.1D2 |
| R76 | BnaA07g33410.1D2 | BnaC06g33330.1D2 |
| R76 | BnaA07g33460.1D2 | BnaC06g33390.1D2 |
| R76 | BnaA07g33540.1D2 | BnaC06g33480.1D2 |
| R76 | BnaA07g33580.1D2 | BnaC06g33660.1D2 |
| R76 | BnaA07g33590.1D2 | BnaC06g33670.1D2 |
| R76 | BnaA07g33630.1D2 | BnaC06g33700.1D2 |
| R76 | BnaA07g33640.1D2 | BnaC06g33710.1D2 |
| R76 | BnaA07g33660.1D2 | BnaC06g33730.1D2 |
| R76 | BnaA07g33700.1D2 | BnaC06g33790.1D2 |
| R76 | BnaA07g33710.1D2 | BnaC06g33800.1D2 |
| R76 | BnaA07g33750.1D2 | BnaC06g33840.1D2 |
| R76 | BnaA07g33890.1D2 | BnaC06g33970.1D2 |
| R76 | BnaA07g33910.1D2 | BnaC06g33990.1D2 |
| R76 | BnaA07g34000.1D2 | BnaC06g34120.1D2 |
| R76 | BnaA07g34030.1D2 | BnaC06g34150.1D2 |
| R76 | BnaA07g34060.1D2 | BnaC06g34180.1D2 |
| R76 | BnaA07g34070.1D2 | BnaC06g34190.1D2 |
| R76 | BnaA07g34120.1D2 | BnaC06g34240.1D2 |
| R76 | BnaA07g34140.1D2 | BnaC06g34260.1D2 |
| R76 | BnaA07g34210.1D2 | BnaC06g34320.1D2 |
| R76 | BnaA07g34230.1D2 | BnaC06g34340.1D2 |

|        |                  |                  |
|--------|------------------|------------------|
| R76    | BnaA07g34250.1D2 | BnaC06g34360.1D2 |
| R76    | BnaA07g34280.1D2 | BnaC06g34380.1D2 |
| R76    | BnaA07g34310.1D2 | BnaC06g34410.1D2 |
| R76    | BnaA07g34420.1D2 | BnaC06g34510.1D2 |
| R76    | BnaA07g34440.1D2 | BnaC06g34530.1D2 |
| R76    | BnaA07g34460.1D2 | BnaC06g34550.1D2 |
| R76    | BnaA07g34560.1D2 | BnaC06g34650.1D2 |
| R76    | BnaA07g34830.1D2 | BnaC06g34960.1D2 |
| R76    | BnaA07g34840.1D2 | BnaC06g34970.1D2 |
| R76    | BnaA07g34850.1D2 | BnaC06g34980.1D2 |
| R76    | BnaA07g34860.1D2 | BnaC06g34990.1D2 |
| R76    | BnaA07g34920.1D2 | BnaC06g35060.1D2 |
| R76    | BnaA07g34960.1D2 | BnaC06g35090.1D2 |
| R76    | BnaA07g34970.1D2 | BnaC06g35100.1D2 |
| R76    | BnaA07g34980.1D2 | BnaC06g35110.1D2 |
| R76    | BnaA07g35070.1D2 | BnaC06g35350.1D2 |
| R76    | BnaA07g35080.1D2 | BnaC06g35360.1D2 |
| R76    | BnaA07g35120.1D2 | BnaC06g33580.1D2 |
| R76    | BnaA07g35130.1D2 | BnaC06g33570.1D2 |
| R76    | BnaA07g35150.1D2 | BnaC06g33550.1D2 |
| R76    | BnaA07g35250.1D2 | BnaC06g34000.1D2 |
| R76    | BnaA07g35260.1D2 | BnaC06g33620.1D2 |
| R76    | BnaA07g35350.1D2 | BnaC06g31040.1D2 |
| R76    | BnaA07g35370.1D2 | BnaC06g31010.1D2 |
| R76    | BnaA07g35420.1D2 | BnaC06g30950.1D2 |
| R76    | BnaA07g35450.1D2 | BnaC06g30920.1D2 |
| R76    | BnaA07g35460.1D2 | BnaC06g31670.1D2 |
| R76    | BnaA07g35470.1D2 | BnaC06g31670.1D2 |
| R76    | BnaA07g35530.1D2 | BnaC06g30880.1D2 |
| RS_4_6 | BnaA07g31570.1D2 | BnaC06g31070.1D2 |
| RS_4_6 | BnaA07g31640.1D2 | BnaC06g31100.1D2 |
| RS_4_6 | BnaA07g31690.1D2 | BnaC06g31140.1D2 |
| RS_4_6 | BnaA07g31740.1D2 | BnaC06g31170.1D2 |
| RS_4_6 | BnaA07g31790.1D2 | BnaC06g31280.1D2 |
| RS_4_6 | BnaA07g31810.1D2 | BnaC06g31300.1D2 |
| RS_4_6 | BnaA07g31840.1D2 | BnaC06g31330.1D2 |
| RS_4_6 | BnaA07g31970.1D2 | BnaC06g31460.1D2 |
| RS_4_6 | BnaA07g32070.1D2 | BnaC06g31880.1D2 |
| RS_4_6 | BnaA07g32200.1D2 | BnaC06g32040.1D2 |
| RS_4_6 | BnaA07g32220.1D2 | BnaC06g32020.1D2 |
| RS_4_6 | BnaA07g32240.1D2 | BnaC06g32070.1D2 |
| RS_4_6 | BnaA07g32320.1D2 | BnaC06g32170.1D2 |
| RS_4_6 | BnaA07g32330.1D2 | BnaC06g32180.1D2 |
| RS_4_6 | BnaA07g32400.1D2 | BnaC06g32240.1D2 |
| RS_4_6 | BnaA07g32410.1D2 | BnaC06g32250.1D2 |
| RS_4_6 | BnaA07g32680.1D2 | BnaC06g32520.1D2 |
| RS_4_6 | BnaA07g32740.1D2 | BnaC06g32570.1D2 |
| RS_4_6 | BnaA07g32750.1D2 | BnaC06g32580.1D2 |
| RS_4_6 | BnaA07g32790.1D2 | BnaC06g32620.1D2 |
| RS_4_6 | BnaA07g32810.1D2 | BnaC06g32640.1D2 |
| RS_4_6 | BnaA07g33030.1D2 | BnaC06g32900.1D2 |

|        |                  |                  |
|--------|------------------|------------------|
| RS_4_6 | BnaA07g33060.1D2 | BnaC06g32940.1D2 |
| RS_4_6 | BnaA07g33070.1D2 | BnaC06g32950.1D2 |
| RS_4_6 | BnaA07g33170.1D2 | BnaC06g33100.1D2 |
| RS_4_6 | BnaA07g33260.1D2 | BnaC06g33160.1D2 |
| RS_4_6 | BnaA07g33270.1D2 | BnaC06g33170.1D2 |
| RS_4_6 | BnaA07g33280.1D2 | BnaC06g33180.1D2 |
| RS_4_6 | BnaA07g33350.1D2 | BnaC06g33250.1D2 |
| RS_4_6 | BnaA07g33540.1D2 | BnaC06g33480.1D2 |
| RS_4_6 | BnaA07g33580.1D2 | BnaC06g33660.1D2 |
| RS_4_6 | BnaA07g33590.1D2 | BnaC06g33670.1D2 |
| RS_4_6 | BnaA07g33630.1D2 | BnaC06g33700.1D2 |
| RS_4_6 | BnaA07g33640.1D2 | BnaC06g33710.1D2 |
| RS_4_6 | BnaA07g33670.1D2 | BnaC06g33740.1D2 |
| RS_4_6 | BnaA07g33710.1D2 | BnaC06g33800.1D2 |
| RS_4_6 | BnaA07g33860.1D2 | BnaC06g33940.1D2 |
| RS_4_6 | BnaA07g33880.1D2 | BnaC06g33960.1D2 |
| RS_4_6 | BnaA07g33970.1D2 | BnaC06g34060.1D2 |
| RS_4_6 | BnaA07g33980.1D2 | BnaC06g34070.1D2 |
| RS_4_6 | BnaA07g34000.1D2 | BnaC06g34120.1D2 |
| RS_4_6 | BnaA07g34010.1D2 | BnaC06g34130.1D2 |
| RS_4_6 | BnaA07g34020.1D2 | BnaC06g34140.1D2 |
| RS_4_6 | BnaA07g34030.1D2 | BnaC06g34150.1D2 |
| RS_4_6 | BnaA07g34090.1D2 | BnaC06g34210.1D2 |
| RS_4_6 | BnaA07g34170.1D2 | BnaC06g34280.1D2 |
| RS_4_6 | BnaA07g34210.1D2 | BnaC06g34320.1D2 |
| RS_4_6 | BnaA07g34410.1D2 | BnaC06g34500.1D2 |
| RS_4_6 | BnaA07g34420.1D2 | BnaC06g34510.1D2 |
| RS_4_6 | BnaA07g34440.1D2 | BnaC06g34530.1D2 |
| RS_4_6 | BnaA07g34520.1D2 | BnaC06g34610.1D2 |
| RS_4_6 | BnaA07g34540.1D2 | BnaC06g34630.1D2 |
| RS_4_6 | BnaA07g34830.1D2 | BnaC06g34960.1D2 |
| RS_4_6 | BnaA07g34920.1D2 | BnaC06g35060.1D2 |
| RS_4_6 | BnaA07g34960.1D2 | BnaC06g35090.1D2 |
| RS_4_6 | BnaA07g34980.1D2 | BnaC06g35110.1D2 |
| RS_4_6 | BnaA07g35000.1D2 | BnaC06g35130.1D2 |
| RS_4_6 | BnaA07g35010.1D2 | BnaC06g35280.1D2 |
| RS_4_6 | BnaA07g35070.1D2 | BnaC06g35350.1D2 |
| RS_4_6 | BnaA07g35130.1D2 | BnaC06g33570.1D2 |
| RS_4_6 | BnaA07g35150.1D2 | BnaC06g33550.1D2 |
| RS_4_6 | BnaA07g35270.1D2 | BnaC06g32140.1D2 |
| RS_4_6 | BnaA07g35350.1D2 | BnaC06g31040.1D2 |
| RS_4_6 | BnaA07g35370.1D2 | BnaC06g31010.1D2 |

**List of HE genes (A09 to C08)**

| <b>Accession</b> | <b>Lost gene</b> | <b>Duplicated HE gene</b> |
|------------------|------------------|---------------------------|
| H149             | BnaA09g45690.1D2 | BnaC08g34770.1D2          |
| H149             | BnaA09g45750.1D2 | BnaC08g34860.1D2          |
| H149             | BnaA09g45760.1D2 | BnaC08g34870.1D2          |
| H149             | BnaA09g45910.1D2 | BnaC08g34220.1D2          |
| H149             | BnaA09g45970.1D2 | BnaC08g34140.1D2          |
| H149             | BnaA09g46000.1D2 | BnaC08g34130.1D2          |

|      |                  |                  |
|------|------------------|------------------|
| H149 | BnaA09g46040.1D2 | BnaC08g33830.1D2 |
| H149 | BnaA09g46050.1D2 | BnaC08g33830.1D2 |
| H149 | BnaA09g46070.1D2 | BnaC08g33840.1D2 |
| H149 | BnaA09g46080.1D2 | BnaC08g33880.1D2 |
| H149 | BnaA09g46090.1D2 | BnaC08g33890.1D2 |
| H149 | BnaA09g46140.1D2 | BnaC08g33950.1D2 |
| H149 | BnaA09g46210.1D2 | BnaC08g34020.1D2 |
| H149 | BnaA09g46480.1D2 | BnaC08g33790.1D2 |
| H149 | BnaA09g46710.1D2 | BnaC08g34390.1D2 |
| H149 | BnaA09g46740.1D2 | BnaC08g34420.1D2 |
| H149 | BnaA09g46770.1D2 | BnaC08g34450.1D2 |
| H149 | BnaA09g46790.1D2 | BnaC08g34470.1D2 |
| H149 | BnaA09g46850.1D2 | BnaC08g34540.1D2 |
| H149 | BnaA09g46930.1D2 | BnaC08g34650.1D2 |
| H149 | BnaA09g46940.1D2 | BnaC08g34660.1D2 |
| H149 | BnaA09g46980.1D2 | BnaC08g34910.1D2 |
| H149 | BnaA09g46990.1D2 | BnaC08g34910.1D2 |
| H149 | BnaA09g47000.1D2 | BnaC08g34920.1D2 |
| H149 | BnaA09g47010.1D2 | BnaC08g34930.1D2 |
| H149 | BnaA09g47040.1D2 | BnaC08g34970.1D2 |
| H149 | BnaA09g47090.1D2 | BnaC08g35030.1D2 |
| H149 | BnaA09g47190.1D2 | BnaC08g35120.1D2 |
| H149 | BnaA09g47300.1D2 | BnaC08g35560.1D2 |
| H149 | BnaA09g47320.1D2 | BnaC08g35580.1D2 |
| H149 | BnaA09g47340.1D2 | BnaC08g35600.1D2 |
| H149 | BnaA09g47360.1D2 | BnaC08g35620.1D2 |
| H149 | BnaA09g47420.1D2 | BnaC08g35680.1D2 |
| H149 | BnaA09g47510.1D2 | BnaC08g35770.1D2 |
| H149 | BnaA09g47530.1D2 | BnaC08g35790.1D2 |
| H149 | BnaA09g47620.1D2 | BnaC08g35890.1D2 |
| H149 | BnaA09g47710.1D2 | BnaC08g35950.1D2 |
| H149 | BnaA09g47720.1D2 | BnaC08g35960.1D2 |
| H149 | BnaA09g47810.1D2 | BnaC08g36020.1D2 |
| H149 | BnaA09g47840.1D2 | BnaC08g36060.1D2 |
| H149 | BnaA09g47900.1D2 | BnaC08g36170.1D2 |
| H149 | BnaA09g47930.1D2 | BnaC08g36200.1D2 |
| H149 | BnaA09g47940.1D2 | BnaC08g36210.1D2 |
| H149 | BnaA09g47980.1D2 | BnaC08g36240.1D2 |
| H149 | BnaA09g48000.1D2 | BnaC08g36280.1D2 |
| H149 | BnaA09g48020.1D2 | BnaC08g36300.1D2 |
| H149 | BnaA09g48070.1D2 | BnaC08g36340.1D2 |
| H149 | BnaA09g48080.1D2 | BnaC08g36350.1D2 |
| H149 | BnaA09g48140.1D2 | BnaC08g36400.1D2 |
| H149 | BnaA09g48160.1D2 | BnaC08g36420.1D2 |
| H149 | BnaA09g48180.1D2 | BnaC08g36440.1D2 |
| H149 | BnaA09g48220.1D2 | BnaC08g36470.1D2 |
| H149 | BnaA09g48230.1D2 | BnaC08g36480.1D2 |
| H149 | BnaA09g48240.1D2 | BnaC08g36490.1D2 |
| H149 | BnaA09g48250.1D2 | BnaC08g36490.1D2 |
| H149 | BnaA09g48260.1D2 | BnaC08g36500.1D2 |
| H149 | BnaA09g48270.1D2 | BnaC08g36510.1D2 |

|      |                  |                  |
|------|------------------|------------------|
| H149 | BnaA09g48490.1D2 | BnaC08g36810.1D2 |
| H149 | BnaA09g48510.1D2 | BnaC08g36840.1D2 |
| H149 | BnaA09g48560.1D2 | BnaC08g36900.1D2 |
| H149 | BnaA09g48580.1D2 | BnaC08g36920.1D2 |
| H149 | BnaA09g48630.1D2 | BnaC08g37000.1D2 |
| H149 | BnaA09g48670.1D2 | BnaC08g37120.1D2 |
| H149 | BnaA09g48750.1D2 | BnaC08g37230.1D2 |
| H149 | BnaA09g48860.1D2 | BnaC08g37410.1D2 |
| H149 | BnaA09g48940.1D2 | BnaC08g37330.1D2 |
| H149 | BnaA09g48950.1D2 | BnaC08g37320.1D2 |
| H149 | BnaA09g49370.1D2 | BnaC08g37870.1D2 |
| H149 | BnaA09g49430.1D2 | BnaC08g37860.1D2 |
| H149 | BnaA09g49450.1D2 | BnaC08g37870.1D2 |
| H149 | BnaA09g49470.1D2 | BnaC08g37890.1D2 |
| H149 | BnaA09g49480.1D2 | BnaC08g37900.1D2 |
| H149 | BnaA09g49490.1D2 | BnaC08g37910.1D2 |
| H149 | BnaA09g49500.1D2 | BnaC08g37920.1D2 |
| H149 | BnaA09g49640.1D2 | BnaC08g38080.1D2 |
| H149 | BnaA09g49660.1D2 | BnaC08g38100.1D2 |
| H149 | BnaA09g49670.1D2 | BnaC08g38110.1D2 |
| H149 | BnaA09g49690.1D2 | BnaC08g38130.1D2 |
| H149 | BnaA09g49710.1D2 | BnaC08g38150.1D2 |
| H149 | BnaA09g49850.1D2 | BnaC08g38320.1D2 |
| H149 | BnaA09g49860.1D2 | BnaC08g38330.1D2 |
| H149 | BnaA09g49890.1D2 | BnaC08g38360.1D2 |
| H149 | BnaA09g49930.1D2 | BnaC08g38430.1D2 |
| H149 | BnaA09g49990.1D2 | BnaC08g38510.1D2 |
| H149 | BnaA09g50030.1D2 | BnaC08g38540.1D2 |
| H149 | BnaA09g50050.1D2 | BnaC08g38560.1D2 |
| H149 | BnaA09g50110.1D2 | BnaC08g38620.1D2 |
| H149 | BnaA09g50130.1D2 | BnaC08g38640.1D2 |
| H149 | BnaA09g50150.1D2 | BnaC08g38660.1D2 |
| H149 | BnaA09g50180.1D2 | BnaC08g40850.1D2 |
| H149 | BnaA09g50460.1D2 | BnaC08g40030.1D2 |
| H149 | BnaA09g50620.1D2 | BnaC08g39900.1D2 |
| H149 | BnaA09g50650.1D2 | BnaC08g39860.1D2 |
| H149 | BnaA09g50670.1D2 | BnaC08g39820.1D2 |
| H149 | BnaA09g50680.1D2 | BnaC08g39810.1D2 |
| H149 | BnaA09g50710.1D2 | BnaC08g39780.1D2 |
| H149 | BnaA09g50760.1D2 | BnaC08g39710.1D2 |
| H149 | BnaA09g50780.1D2 | BnaC08g39690.1D2 |
| H149 | BnaA09g50820.1D2 | BnaC08g39620.1D2 |
| H149 | BnaA09g50830.1D2 | BnaC08g39630.1D2 |
| H149 | BnaA09g50900.1D2 | BnaC08g39570.1D2 |
| H149 | BnaA09g51040.1D2 | BnaC08g39410.1D2 |
| H149 | BnaA09g51070.1D2 | BnaC08g39380.1D2 |
| H149 | BnaA09g51110.1D2 | BnaC08g39340.1D2 |
| H149 | BnaA09g51130.1D2 | BnaC08g39300.1D2 |
| H149 | BnaA09g51270.1D2 | BnaC08g37740.1D2 |
| H149 | BnaA09g51310.1D2 | BnaC08g37700.1D2 |
| H149 | BnaA09g51420.1D2 | BnaC08g38380.1D2 |



|      |                  |                  |
|------|------------------|------------------|
| H149 | BnaA09g51430.1D2 | BnaC08g38520.1D2 |
| H149 | BnaA09g51440.1D2 | BnaC08g40780.1D2 |
| H149 | BnaA09g51480.1D2 | BnaC08g37930.1D2 |
| H149 | BnaA09g51510.1D2 | BnaC08g39270.1D2 |
| H149 | BnaA09g51520.1D2 | BnaC08g39260.1D2 |
| H149 | BnaA09g51620.1D2 | BnaC08g40070.1D2 |
| H149 | BnaA09g51900.1D2 | BnaC08g39000.1D2 |
| H149 | BnaA09g51950.1D2 | BnaC08g38910.1D2 |
| H149 | BnaA09g51990.1D2 | BnaC08g38870.1D2 |
| H149 | BnaA09g52060.1D2 | BnaC08g38800.1D2 |
| H149 | BnaA09g52230.1D2 | BnaC08g40920.1D2 |
| H149 | BnaA09g52270.1D2 | BnaC08g40960.1D2 |
| H149 | BnaA09g52330.1D2 | BnaC08g41070.1D2 |
| H149 | BnaA09g52340.1D2 | BnaC08g41070.1D2 |
| S_39 | BnaA09g47690.1D2 | BnaC08g35930.1D2 |
| S_39 | BnaA09g47840.1D2 | BnaC08g36060.1D2 |
| S_39 | BnaA09g47930.1D2 | BnaC08g36200.1D2 |
| S_39 | BnaA09g47940.1D2 | BnaC08g36210.1D2 |
| S_39 | BnaA09g47950.1D2 | BnaC08g36220.1D2 |
| S_39 | BnaA09g47970.1D2 | BnaC08g36240.1D2 |
| S_39 | BnaA09g47980.1D2 | BnaC08g36240.1D2 |
| S_39 | BnaA09g48000.1D2 | BnaC08g36280.1D2 |
| S_39 | BnaA09g48060.1D2 | BnaC08g36320.1D2 |
| S_39 | BnaA09g48090.1D2 | BnaC08g36360.1D2 |
| S_39 | BnaA09g48100.1D2 | BnaC08g36370.1D2 |
| S_39 | BnaA09g48120.1D2 | BnaC08g36390.1D2 |
| S_39 | BnaA09g48160.1D2 | BnaC08g36420.1D2 |
| S_39 | BnaA09g48180.1D2 | BnaC08g36440.1D2 |
| S_39 | BnaA09g48240.1D2 | BnaC08g36490.1D2 |
| S_39 | BnaA09g48250.1D2 | BnaC08g36490.1D2 |
| S_39 | BnaA09g48480.1D2 | BnaC08g36800.1D2 |
| S_39 | BnaA09g48560.1D2 | BnaC08g36900.1D2 |
| S_39 | BnaA09g48630.1D2 | BnaC08g37000.1D2 |
| S_39 | BnaA09g48660.1D2 | BnaC08g37050.1D2 |
| S_39 | BnaA09g48750.1D2 | BnaC08g37230.1D2 |
| S_39 | BnaA09g48950.1D2 | BnaC08g37320.1D2 |
| S_39 | BnaA09g49090.1D2 | BnaC08g37450.1D2 |
| S_39 | BnaA09g49100.1D2 | BnaC08g35390.1D2 |
| S_39 | BnaA09g49340.1D2 | BnaC08g37770.1D2 |
| S_39 | BnaA09g49410.1D2 | BnaC08g37840.1D2 |
| S_39 | BnaA09g49430.1D2 | BnaC08g37860.1D2 |
| S_39 | BnaA09g49450.1D2 | BnaC08g37870.1D2 |
| S_39 | BnaA09g49470.1D2 | BnaC08g37890.1D2 |
| S_39 | BnaA09g49480.1D2 | BnaC08g37900.1D2 |
| S_39 | BnaA09g49490.1D2 | BnaC08g37910.1D2 |
| S_39 | BnaA09g49500.1D2 | BnaC08g37920.1D2 |
| S_39 | BnaA09g49640.1D2 | BnaC08g38080.1D2 |
| S_39 | BnaA09g49660.1D2 | BnaC08g38100.1D2 |
| S_39 | BnaA09g49690.1D2 | BnaC08g38130.1D2 |
| S_39 | BnaA09g49700.1D2 | BnaC08g38140.1D2 |
| S_39 | BnaA09g49710.1D2 | BnaC08g38150.1D2 |

|      |                  |                  |
|------|------------------|------------------|
| S_39 | BnaA09g49770.1D2 | BnaC08g38210.1D2 |
| S_39 | BnaA09g49830.1D2 | BnaC08g38300.1D2 |
| S_39 | BnaA09g49860.1D2 | BnaC08g38330.1D2 |
| S_39 | BnaA09g49930.1D2 | BnaC08g38430.1D2 |
| S_39 | BnaA09g49990.1D2 | BnaC08g38510.1D2 |
| S_39 | BnaA09g50030.1D2 | BnaC08g38540.1D2 |
| S_39 | BnaA09g50100.1D2 | BnaC08g38610.1D2 |
| S_39 | BnaA09g50130.1D2 | BnaC08g38640.1D2 |
| S_39 | BnaA09g50180.1D2 | BnaC08g40850.1D2 |
| S_39 | BnaA09g50260.1D2 | BnaC08g40410.1D2 |
| S_39 | BnaA09g50330.1D2 | BnaC08g40340.1D2 |
| S_39 | BnaA09g50340.1D2 | BnaC08g40330.1D2 |
| S_39 | BnaA09g50410.1D2 | BnaC08g40230.1D2 |
| S_39 | BnaA09g50460.1D2 | BnaC08g40030.1D2 |
| S_39 | BnaA09g50540.1D2 | BnaC08g39990.1D2 |
| S_39 | BnaA09g50550.1D2 | BnaC08g39980.1D2 |
| S_39 | BnaA09g50580.1D2 | BnaC08g39950.1D2 |
| S_39 | BnaA09g50620.1D2 | BnaC08g39900.1D2 |
| S_39 | BnaA09g50670.1D2 | BnaC08g39820.1D2 |
| S_39 | BnaA09g50680.1D2 | BnaC08g39810.1D2 |
| S_39 | BnaA09g50710.1D2 | BnaC08g39780.1D2 |
| S_39 | BnaA09g50760.1D2 | BnaC08g39710.1D2 |
| S_39 | BnaA09g50770.1D2 | BnaC08g39700.1D2 |
| S_39 | BnaA09g50790.1D2 | BnaC08g39680.1D2 |
| S_39 | BnaA09g50830.1D2 | BnaC08g39630.1D2 |
| S_39 | BnaA09g50900.1D2 | BnaC08g39570.1D2 |
| S_39 | BnaA09g50930.1D2 | BnaC08g39520.1D2 |
| S_39 | BnaA09g50940.1D2 | BnaC08g39510.1D2 |
| S_39 | BnaA09g51030.1D2 | BnaC08g39420.1D2 |
| S_39 | BnaA09g51040.1D2 | BnaC08g39410.1D2 |
| S_39 | BnaA09g51070.1D2 | BnaC08g39380.1D2 |
| S_39 | BnaA09g51080.1D2 | BnaC08g39370.1D2 |
| S_39 | BnaA09g51290.1D2 | BnaC08g37720.1D2 |
| S_39 | BnaA09g51300.1D2 | BnaC08g37710.1D2 |
| S_39 | BnaA09g51320.1D2 | BnaC08g37690.1D2 |
| S_39 | BnaA09g51430.1D2 | BnaC08g38520.1D2 |
| S_39 | BnaA09g51470.1D2 | BnaC08g38260.1D2 |
| S_39 | BnaA09g51480.1D2 | BnaC08g37930.1D2 |
| S_39 | BnaA09g51630.1D2 | BnaC08g40080.1D2 |
| S_39 | BnaA09g51690.1D2 | BnaC08g40180.1D2 |
| S_39 | BnaA09g51700.1D2 | BnaC08g40190.1D2 |

**List of HE genes (A09 to C09)**

| <b>Accession</b> | <b>Lost gene</b> | <b>Duplicated HE gene</b> |
|------------------|------------------|---------------------------|
| Sensation        | BnaA09g00940.1D2 | BnaC09g01180.1D2          |
| Sensation        | BnaA09g01460.1D2 | BnaC09g01130.1D2          |
| Sensation        | BnaA09g01520.1D2 | BnaC09g01080.1D2          |
| Sensation        | BnaA09g01570.1D2 | BnaC09g00020.1D2          |
| Sensation        | BnaA09g01580.1D2 | BnaC09g00030.1D2          |
| Sensation        | BnaA09g01590.1D2 | BnaC09g00040.1D2          |
| Sensation        | BnaA09g01630.1D2 | BnaC09g00060.1D2          |

|           |                  |                  |
|-----------|------------------|------------------|
| Sensation | BnaA09g01690.1D2 | BnaC09g00130.1D2 |
| Sensation | BnaA09g01700.1D2 | BnaC09g00140.1D2 |
| Sensation | BnaA09g01720.1D2 | BnaC09g00170.1D2 |
| Sensation | BnaA09g01740.1D2 | BnaC09g00180.1D2 |
| Sensation | BnaA09g01810.1D2 | BnaC09g00270.1D2 |
| Sensation | BnaA09g01820.1D2 | BnaC09g00280.1D2 |
| Sensation | BnaA09g01940.1D2 | BnaC09g00450.1D2 |
| Sensation | BnaA09g02010.1D2 | BnaC09g00540.1D2 |
| Sensation | BnaA09g02080.1D2 | BnaC09g00590.1D2 |
| Sensation | BnaA09g02090.1D2 | BnaC09g00600.1D2 |
| Sensation | BnaA09g02120.1D2 | BnaC09g00630.1D2 |
| Sensation | BnaA09g02140.1D2 | BnaC09g00650.1D2 |
| Sensation | BnaA09g02150.1D2 | BnaC09g00660.1D2 |
| Sensation | BnaA09g02280.1D2 | BnaC09g00800.1D2 |
| Sensation | BnaA09g02330.1D2 | BnaC09g00860.1D2 |
| Sensation | BnaA09g02640.1D2 | BnaC09g01410.1D2 |
| Sensation | BnaA09g02740.1D2 | BnaC09g01470.1D2 |
| Sensation | BnaA09g02780.1D2 | BnaC09g01490.1D2 |
| Sensation | BnaA09g02800.1D2 | BnaC09g01510.1D2 |
| Sensation | BnaA09g02810.1D2 | BnaC09g01520.1D2 |
| Sensation | BnaA09g02820.1D2 | BnaC09g01530.1D2 |
| Sensation | BnaA09g02890.1D2 | BnaC09g01560.1D2 |
| Sensation | BnaA09g02970.1D2 | BnaC09g01710.1D2 |
| Sensation | BnaA09g03150.1D2 | BnaC09g01850.1D2 |
| Sensation | BnaA09g03210.1D2 | BnaC09g01910.1D2 |
| Sensation | BnaA09g03410.1D2 | BnaC09g02020.1D2 |
| Sensation | BnaA09g03420.1D2 | BnaC09g02030.1D2 |
| Sensation | BnaA09g03530.1D2 | BnaC09g02130.1D2 |
| Sensation | BnaA09g03750.1D2 | BnaC09g02310.1D2 |
| Sensation | BnaA09g03770.1D2 | BnaC09g02360.1D2 |
| Sensation | BnaA09g03850.1D2 | BnaC09g02410.1D2 |
| Sensation | BnaA09g03900.1D2 | BnaC09g02450.1D2 |
| Sensation | BnaA09g04180.1D2 | BnaC09g01230.1D2 |
| Sensation | BnaA09g24780.1D2 | BnaC09g01280.1D2 |
| Nunsdale  | BnaA09g02970.1D2 | BnaC09g01710.1D2 |
| Nunsdale  | BnaA09g02980.1D2 | BnaC09g01720.1D2 |
| Nunsdale  | BnaA09g02990.1D2 | BnaC09g01730.1D2 |
| Nunsdale  | BnaA09g03000.1D2 | BnaC09g01740.1D2 |
| Nunsdale  | BnaA09g03010.1D2 | BnaC09g01750.1D2 |
| Nunsdale  | BnaA09g03020.1D2 | BnaC09g01770.1D2 |
| Nunsdale  | BnaA09g03030.1D2 | BnaC09g01780.1D2 |
| Nunsdale  | BnaA09g03150.1D2 | BnaC09g01850.1D2 |
| Nunsdale  | BnaA09g03210.1D2 | BnaC09g01910.1D2 |
| Nunsdale  | BnaA09g03310.1D2 | BnaC09g03130.1D2 |
| Nunsdale  | BnaA09g03410.1D2 | BnaC09g02020.1D2 |
| Nunsdale  | BnaA09g03480.1D2 | BnaC09g02090.1D2 |
| Nunsdale  | BnaA09g03670.1D2 | BnaC09g02240.1D2 |
| Nunsdale  | BnaA09g03720.1D2 | BnaC09g02280.1D2 |
| Nunsdale  | BnaA09g03910.1D2 | BnaC09g02460.1D2 |
| Nunsdale  | BnaA09g04460.1D2 | BnaC09g02850.1D2 |
| Nunsdale  | BnaA09g04530.1D2 | BnaC09g02910.1D2 |

|          |                  |                  |
|----------|------------------|------------------|
| Nunsdale | BnaA09g04540.1D2 | BnaC09g02920.1D2 |
| Nunsdale | BnaA09g04590.1D2 | BnaC09g02960.1D2 |
| Nunsdale | BnaA09g04600.1D2 | BnaC09g02970.1D2 |
| Nunsdale | BnaA09g04610.1D2 | BnaC09g02980.1D2 |
| Nunsdale | BnaA09g04640.1D2 | BnaC09g03000.1D2 |
| Nunsdale | BnaA09g04790.1D2 | BnaC09g03410.1D2 |
| Nunsdale | BnaA09g04890.1D2 | BnaC09g03500.1D2 |
| Nunsdale | BnaA09g04920.1D2 | BnaC09g03540.1D2 |
| Nunsdale | BnaA09g05350.1D2 | BnaC09g03940.1D2 |
| Nunsdale | BnaA09g05380.1D2 | BnaC09g03960.1D2 |
| Nunsdale | BnaA09g05390.1D2 | BnaC09g03970.1D2 |
| Nunsdale | BnaA09g06310.1D2 | BnaC09g04930.1D2 |
| Nunsdale | BnaA09g06940.1D2 | BnaC09g05790.1D2 |
| Nunsdale | BnaA09g07710.1D2 | BnaC09g06790.1D2 |
| Nunsdale | BnaA09g07970.1D2 | BnaC09g07100.1D2 |
| Nunsdale | BnaA09g24770.1D2 | BnaC09g01270.1D2 |
| G50      | BnaA09g02270.1D2 | BnaC09g00790.1D2 |
| G50      | BnaA09g02280.1D2 | BnaC09g00800.1D2 |
| G50      | BnaA09g02510.1D2 | BnaC09g01340.1D2 |
| G50      | BnaA09g02570.1D2 | BnaC09g01370.1D2 |
| G50      | BnaA09g02740.1D2 | BnaC09g01470.1D2 |
| G50      | BnaA09g02770.1D2 | BnaC09g01480.1D2 |
| G50      | BnaA09g02780.1D2 | BnaC09g01490.1D2 |
| G50      | BnaA09g02880.1D2 | BnaC09g01570.1D2 |
| G50      | BnaA09g02910.1D2 | BnaC09g01610.1D2 |
| G50      | BnaA09g02920.1D2 | BnaC09g01640.1D2 |
| G50      | BnaA09g02930.1D2 | BnaC09g01660.1D2 |
| G50      | BnaA09g02940.1D2 | BnaC09g01670.1D2 |
| G50      | BnaA09g02960.1D2 | BnaC09g01700.1D2 |
| G50      | BnaA09g02980.1D2 | BnaC09g01720.1D2 |
| G50      | BnaA09g03000.1D2 | BnaC09g01740.1D2 |
| G50      | BnaA09g03150.1D2 | BnaC09g01850.1D2 |
| G50      | BnaA09g03160.1D2 | BnaC09g01860.1D2 |
| G50      | BnaA09g03210.1D2 | BnaC09g01910.1D2 |
| G50      | BnaA09g03420.1D2 | BnaC09g02030.1D2 |
| G50      | BnaA09g03610.1D2 | BnaC09g02180.1D2 |
| G50      | BnaA09g03670.1D2 | BnaC09g02240.1D2 |
| G50      | BnaA09g03690.1D2 | BnaC09g02260.1D2 |
| G50      | BnaA09g03700.1D2 | BnaC09g02270.1D2 |
| G50      | BnaA09g03750.1D2 | BnaC09g02310.1D2 |
| G50      | BnaA09g03770.1D2 | BnaC09g02360.1D2 |
| G50      | BnaA09g03900.1D2 | BnaC09g02450.1D2 |
| G50      | BnaA09g03910.1D2 | BnaC09g02460.1D2 |
| G50      | BnaA09g04110.1D2 | BnaC09g02570.1D2 |
| G50      | BnaA09g04220.1D2 | BnaC09g01040.1D2 |
| G50      | BnaA09g04280.1D2 | BnaC09g02650.1D2 |
| G50      | BnaA09g04430.1D2 | BnaC09g02830.1D2 |
| G50      | BnaA09g04460.1D2 | BnaC09g02850.1D2 |
| G50      | BnaA09g04530.1D2 | BnaC09g02910.1D2 |
| G50      | BnaA09g04540.1D2 | BnaC09g02920.1D2 |
| G50      | BnaA09g04590.1D2 | BnaC09g02960.1D2 |

|     |                  |                  |
|-----|------------------|------------------|
| G50 | BnaA09g04600.1D2 | BnaC09g02970.1D2 |
| G50 | BnaA09g04610.1D2 | BnaC09g02980.1D2 |
| G50 | BnaA09g04690.1D2 | BnaC09g05720.1D2 |
| G50 | BnaA09g04790.1D2 | BnaC09g03410.1D2 |
| G50 | BnaA09g04850.1D2 | BnaC09g03470.1D2 |
| G50 | BnaA09g04890.1D2 | BnaC09g03500.1D2 |
| G50 | BnaA09g05120.1D2 | BnaC09g03710.1D2 |
| G50 | BnaA09g05130.1D2 | BnaC09g03730.1D2 |
| G50 | BnaA09g05150.1D2 | BnaC09g03760.1D2 |
| G50 | BnaA09g05190.1D2 | BnaC09g05660.1D2 |
| G50 | BnaA09g05200.1D2 | BnaC09g05670.1D2 |
| G50 | BnaA09g05350.1D2 | BnaC09g03940.1D2 |
| G50 | BnaA09g05380.1D2 | BnaC09g03960.1D2 |
| G50 | BnaA09g05390.1D2 | BnaC09g03970.1D2 |
| G50 | BnaA09g05510.1D2 | BnaC09g04140.1D2 |
| G50 | BnaA09g05530.1D2 | BnaC09g04150.1D2 |
| G50 | BnaA09g05550.1D2 | BnaC09g04180.1D2 |
| G50 | BnaA09g05660.1D2 | BnaC09g04320.1D2 |
| G50 | BnaA09g06010.1D2 | BnaC09g05700.1D2 |
| G50 | BnaA09g06030.1D2 | BnaC09g04650.1D2 |
| G50 | BnaA09g06050.1D2 | BnaC09g04670.1D2 |
| G50 | BnaA09g06060.1D2 | BnaC09g04680.1D2 |
| G50 | BnaA09g06100.1D2 | BnaC09g04730.1D2 |
| G50 | BnaA09g06150.1D2 | BnaC09g05620.1D2 |
| G50 | BnaA09g06280.1D2 | BnaC09g04890.1D2 |
| G50 | BnaA09g06300.1D2 | BnaC09g04920.1D2 |
| G50 | BnaA09g06330.1D2 | BnaC09g04950.1D2 |
| G50 | BnaA09g06340.1D2 | BnaC09g05020.1D2 |
| G50 | BnaA09g06350.1D2 | BnaC09g05030.1D2 |
| G50 | BnaA09g06360.1D2 | BnaC09g05050.1D2 |
| G50 | BnaA09g06450.1D2 | BnaC09g05080.1D2 |
| G50 | BnaA09g06460.1D2 | BnaC09g05090.1D2 |
| G50 | BnaA09g06530.1D2 | BnaC09g05160.1D2 |
| G50 | BnaA09g06540.1D2 | BnaC09g05170.1D2 |
| G50 | BnaA09g06550.1D2 | BnaC09g05180.1D2 |
| G50 | BnaA09g06640.1D2 | BnaC09g05280.1D2 |
| G50 | BnaA09g06660.1D2 | BnaC09g05300.1D2 |
| G50 | BnaA09g06770.1D2 | BnaC09g05580.1D2 |
| G50 | BnaA09g06850.1D2 | BnaC09g05470.1D2 |
| G50 | BnaA09g07280.1D2 | BnaC09g06290.1D2 |
| G50 | BnaA09g07290.1D2 | BnaC09g06310.1D2 |
| G50 | BnaA09g07330.1D2 | BnaC09g06350.1D2 |
| G50 | BnaA09g07390.1D2 | BnaC09g06400.1D2 |
| G50 | BnaA09g07410.1D2 | BnaC09g06420.1D2 |
| G50 | BnaA09g07420.1D2 | BnaC09g06430.1D2 |
| G50 | BnaA09g07440.1D2 | BnaC09g06450.1D2 |
| G50 | BnaA09g07450.1D2 | BnaC09g06460.1D2 |
| G50 | BnaA09g07470.1D2 | BnaC09g06500.1D2 |
| G50 | BnaA09g07540.1D2 | BnaC09g06590.1D2 |
| G50 | BnaA09g07620.1D2 | BnaC09g06690.1D2 |
| G50 | BnaA09g07630.1D2 | BnaC09g06700.1D2 |

|     |                  |                  |
|-----|------------------|------------------|
| G50 | BnaA09g07660.1D2 | BnaC09g06740.1D2 |
| G50 | BnaA09g07710.1D2 | BnaC09g06790.1D2 |
| G50 | BnaA09g07790.1D2 | BnaC09g08510.1D2 |
| G50 | BnaA09g07830.1D2 | BnaC09g06970.1D2 |
| G50 | BnaA09g07840.1D2 | BnaC09g06980.1D2 |
| G50 | BnaA09g07850.1D2 | BnaC09g06990.1D2 |
| G50 | BnaA09g07860.1D2 | BnaC09g08550.1D2 |
| G50 | BnaA09g07890.1D2 | BnaC09g07030.1D2 |
| G50 | BnaA09g07910.1D2 | BnaC09g07050.1D2 |
| G50 | BnaA09g07950.1D2 | BnaC09g07090.1D2 |
| G50 | BnaA09g07970.1D2 | BnaC09g07100.1D2 |
| G50 | BnaA09g07980.1D2 | BnaC09g07130.1D2 |
| G50 | BnaA09g07990.1D2 | BnaC09g07140.1D2 |
| G50 | BnaA09g08000.1D2 | BnaC09g07150.1D2 |
| G50 | BnaA09g08140.1D2 | BnaC09g07330.1D2 |
| G50 | BnaA09g08200.1D2 | BnaC09g07380.1D2 |
| G50 | BnaA09g08250.1D2 | BnaC09g07430.1D2 |
| G50 | BnaA09g08330.1D2 | BnaC09g07680.1D2 |
| G50 | BnaA09g08360.1D2 | BnaC09g07710.1D2 |
| G50 | BnaA09g08420.1D2 | BnaC09g07780.1D2 |
| G50 | BnaA09g08440.1D2 | BnaC09g07810.1D2 |
| G50 | BnaA09g08450.1D2 | BnaC09g07820.1D2 |
| G50 | BnaA09g08480.1D2 | BnaC09g07870.1D2 |
| G50 | BnaA09g08510.1D2 | BnaC09g07920.1D2 |
| G50 | BnaA09g08530.1D2 | BnaC09g07940.1D2 |
| G50 | BnaA09g08540.1D2 | BnaC09g07950.1D2 |
| G50 | BnaA09g08570.1D2 | BnaC09g07980.1D2 |
| G50 | BnaA09g08580.1D2 | BnaC09g07990.1D2 |
| G50 | BnaA09g08600.1D2 | BnaC09g08010.1D2 |
| G50 | BnaA09g08610.1D2 | BnaC09g08020.1D2 |
| G50 | BnaA09g08620.1D2 | BnaC09g08030.1D2 |
| G50 | BnaA09g08670.1D2 | BnaC09g08060.1D2 |
| G50 | BnaA09g08810.1D2 | BnaC09g07560.1D2 |
| G50 | BnaA09g08900.1D2 | BnaC09g06890.1D2 |
| G50 | BnaA09g08940.1D2 | BnaC09g06090.1D2 |
| G50 | BnaA09g08970.1D2 | BnaC09g06140.1D2 |
| G50 | BnaA09g08990.1D2 | BnaC09g06200.1D2 |
| G50 | BnaA09g09410.1D2 | BnaC09g08810.1D2 |
| G50 | BnaA09g09440.1D2 | BnaC09g08860.1D2 |
| G50 | BnaA09g09460.1D2 | BnaC09g08880.1D2 |
| G50 | BnaA09g09510.1D2 | BnaC09g08940.1D2 |
| G50 | BnaA09g09530.1D2 | BnaC09g08960.1D2 |
| G50 | BnaA09g09580.1D2 | BnaC09g09010.1D2 |
| G50 | BnaA09g09610.1D2 | BnaC09g09040.1D2 |
| G50 | BnaA09g09760.1D2 | BnaC09g09120.1D2 |
| G50 | BnaA09g09760.1D2 | BnaC09g09130.1D2 |
| G50 | BnaA09g09770.1D2 | BnaC09g09120.1D2 |
| G50 | BnaA09g09770.1D2 | BnaC09g09130.1D2 |
| G50 | BnaA09g09810.1D2 | BnaC09g09170.1D2 |
| G50 | BnaA09g09870.1D2 | BnaC09g09230.1D2 |
| G50 | BnaA09g09880.1D2 | BnaC09g09240.1D2 |

|      |                  |                  |
|------|------------------|------------------|
| G50  | BnaA09g10210.1D2 | BnaC09g08470.1D2 |
| G50  | BnaA09g10220.1D2 | BnaC09g08460.1D2 |
| G50  | BnaA09g10450.1D2 | BnaC09g08650.1D2 |
| G50  | BnaA09g10470.1D2 | BnaC09g08610.1D2 |
| G50  | BnaA09g24770.1D2 | BnaC09g01270.1D2 |
| H176 | BnaA09g00920.1D2 | BnaC09g01160.1D2 |
| H176 | BnaA09g01410.1D2 | BnaC09g03180.1D2 |
| H176 | BnaA09g01510.1D2 | BnaC09g01090.1D2 |
| H176 | BnaA09g01550.1D2 | BnaC09g01050.1D2 |
| H176 | BnaA09g01580.1D2 | BnaC09g00030.1D2 |
| H176 | BnaA09g01590.1D2 | BnaC09g00040.1D2 |
| H176 | BnaA09g01630.1D2 | BnaC09g00060.1D2 |
| H176 | BnaA09g01700.1D2 | BnaC09g00140.1D2 |
| H176 | BnaA09g01720.1D2 | BnaC09g00170.1D2 |
| H176 | BnaA09g01780.1D2 | BnaC09g00220.1D2 |
| H176 | BnaA09g01790.1D2 | BnaC09g00250.1D2 |
| H176 | BnaA09g01810.1D2 | BnaC09g00270.1D2 |
| H176 | BnaA09g01820.1D2 | BnaC09g00280.1D2 |
| H176 | BnaA09g02120.1D2 | BnaC09g00630.1D2 |
| H176 | BnaA09g02280.1D2 | BnaC09g00800.1D2 |
| H176 | BnaA09g02390.1D2 | BnaC09g00960.1D2 |
| H176 | BnaA09g02570.1D2 | BnaC09g01370.1D2 |
| H176 | BnaA09g02770.1D2 | BnaC09g01480.1D2 |
| H176 | BnaA09g02910.1D2 | BnaC09g01610.1D2 |
| H176 | BnaA09g02970.1D2 | BnaC09g01710.1D2 |
| H176 | BnaA09g03010.1D2 | BnaC09g01750.1D2 |
| H176 | BnaA09g03020.1D2 | BnaC09g01770.1D2 |
| H176 | BnaA09g03210.1D2 | BnaC09g01910.1D2 |
| H176 | BnaA09g03530.1D2 | BnaC09g02130.1D2 |
| H176 | BnaA09g03610.1D2 | BnaC09g02180.1D2 |
| H176 | BnaA09g03670.1D2 | BnaC09g02240.1D2 |
| H176 | BnaA09g03690.1D2 | BnaC09g02260.1D2 |
| H176 | BnaA09g03750.1D2 | BnaC09g02310.1D2 |
| H176 | BnaA09g03770.1D2 | BnaC09g02360.1D2 |
| H176 | BnaA09g03900.1D2 | BnaC09g02450.1D2 |
| H176 | BnaA09g03930.1D2 | BnaC09g02480.1D2 |
| H176 | BnaA09g04070.1D2 | BnaC09g02520.1D2 |
| H176 | BnaA09g04210.1D2 | BnaC09g01040.1D2 |
| H176 | BnaA09g04220.1D2 | BnaC09g01040.1D2 |
| H176 | BnaA09g04330.1D2 | BnaC09g02690.1D2 |
| H176 | BnaA09g04410.1D2 | BnaC09g02800.1D2 |
| H176 | BnaA09g04460.1D2 | BnaC09g02850.1D2 |
| H176 | BnaA09g04530.1D2 | BnaC09g02910.1D2 |
| H176 | BnaA09g04540.1D2 | BnaC09g02920.1D2 |
| H176 | BnaA09g04590.1D2 | BnaC09g02960.1D2 |
| H176 | BnaA09g04600.1D2 | BnaC09g02970.1D2 |
| H176 | BnaA09g04610.1D2 | BnaC09g02980.1D2 |
| H176 | BnaA09g04630.1D2 | BnaC09g02990.1D2 |
| H176 | BnaA09g04640.1D2 | BnaC09g03000.1D2 |
| H176 | BnaA09g04690.1D2 | BnaC09g05720.1D2 |
| H176 | BnaA09g04850.1D2 | BnaC09g03470.1D2 |

|      |                  |                  |
|------|------------------|------------------|
| H176 | BnaA09g04870.1D2 | BnaC09g03480.1D2 |
| H176 | BnaA09g04940.1D2 | BnaC09g03550.1D2 |
| H176 | BnaA09g05020.1D2 | BnaC09g03620.1D2 |
| H176 | BnaA09g05120.1D2 | BnaC09g03710.1D2 |
| H176 | BnaA09g05130.1D2 | BnaC09g03730.1D2 |
| H176 | BnaA09g05380.1D2 | BnaC09g03960.1D2 |
| H176 | BnaA09g05390.1D2 | BnaC09g03970.1D2 |
| H176 | BnaA09g05510.1D2 | BnaC09g04140.1D2 |
| H176 | BnaA09g24770.1D2 | BnaC09g01270.1D2 |
| R53  | BnaA09g00940.1D2 | BnaC09g01180.1D2 |
| R53  | BnaA09g01340.1D2 | BnaC09g03250.1D2 |
| R53  | BnaA09g01700.1D2 | BnaC09g00140.1D2 |
| R53  | BnaA09g01780.1D2 | BnaC09g00220.1D2 |
| R53  | BnaA09g01890.1D2 | BnaC09g00360.1D2 |
| R53  | BnaA09g01990.1D2 | BnaC09g00510.1D2 |
| R53  | BnaA09g02010.1D2 | BnaC09g00540.1D2 |
| R53  | BnaA09g02030.1D2 | BnaC09g00560.1D2 |
| R53  | BnaA09g02080.1D2 | BnaC09g00590.1D2 |
| R53  | BnaA09g02090.1D2 | BnaC09g00600.1D2 |
| R53  | BnaA09g02120.1D2 | BnaC09g00630.1D2 |
| R53  | BnaA09g02150.1D2 | BnaC09g00660.1D2 |
| R53  | BnaA09g02280.1D2 | BnaC09g00800.1D2 |
| R53  | BnaA09g02330.1D2 | BnaC09g00860.1D2 |
| R53  | BnaA09g05130.1D2 | BnaC09g03730.1D2 |
| R53  | BnaA09g05300.1D2 | BnaC09g03880.1D2 |
| R53  | BnaA09g05350.1D2 | BnaC09g03940.1D2 |
| R53  | BnaA09g05380.1D2 | BnaC09g03960.1D2 |
| R53  | BnaA09g05390.1D2 | BnaC09g03970.1D2 |
| R53  | BnaA09g05510.1D2 | BnaC09g04140.1D2 |
| R53  | BnaA09g05530.1D2 | BnaC09g04150.1D2 |
| R53  | BnaA09g05660.1D2 | BnaC09g04320.1D2 |
| R53  | BnaA09g05880.1D2 | BnaC09g04520.1D2 |
| R53  | BnaA09g06030.1D2 | BnaC09g04650.1D2 |
| R53  | BnaA09g06050.1D2 | BnaC09g04670.1D2 |
| R53  | BnaA09g06060.1D2 | BnaC09g04680.1D2 |
| R53  | BnaA09g06150.1D2 | BnaC09g05620.1D2 |
| R53  | BnaA09g06190.1D2 | BnaC09g04800.1D2 |
| R53  | BnaA09g06300.1D2 | BnaC09g04920.1D2 |
| R53  | BnaA09g06310.1D2 | BnaC09g04930.1D2 |
| R53  | BnaA09g06330.1D2 | BnaC09g04950.1D2 |
| R53  | BnaA09g06350.1D2 | BnaC09g05030.1D2 |
| R53  | BnaA09g06390.1D2 | BnaC09g05070.1D2 |
| R53  | BnaA09g06450.1D2 | BnaC09g05080.1D2 |
| R53  | BnaA09g06460.1D2 | BnaC09g05090.1D2 |
| R53  | BnaA09g06480.1D2 | BnaC09g05110.1D2 |
| R53  | BnaA09g06530.1D2 | BnaC09g05160.1D2 |
| R53  | BnaA09g06540.1D2 | BnaC09g05170.1D2 |
| R53  | BnaA09g06550.1D2 | BnaC09g05180.1D2 |
| R53  | BnaA09g06560.1D2 | BnaC09g05200.1D2 |
| R53  | BnaA09g06570.1D2 | BnaC09g05210.1D2 |
| R53  | BnaA09g06580.1D2 | BnaC09g05220.1D2 |



|     |                  |                  |
|-----|------------------|------------------|
| R53 | BnaA09g06590.1D2 | BnaC09g05230.1D2 |
| R53 | BnaA09g06610.1D2 | BnaC09g05240.1D2 |
| R53 | BnaA09g06620.1D2 | BnaC09g05250.1D2 |
| R53 | BnaA09g06640.1D2 | BnaC09g05280.1D2 |
| R53 | BnaA09g06650.1D2 | BnaC09g05290.1D2 |
| R53 | BnaA09g06720.1D2 | BnaC09g05390.1D2 |
| R53 | BnaA09g06770.1D2 | BnaC09g05580.1D2 |
| R53 | BnaA09g06850.1D2 | BnaC09g05470.1D2 |
| R53 | BnaA09g06860.1D2 | BnaC09g05480.1D2 |
| R53 | BnaA09g07110.1D2 | BnaC09g09360.1D2 |
| R53 | BnaA09g07310.1D2 | BnaC09g06330.1D2 |
| R53 | BnaA09g07330.1D2 | BnaC09g06350.1D2 |
| R53 | BnaA09g07380.1D2 | BnaC09g06390.1D2 |
| R53 | BnaA09g07390.1D2 | BnaC09g06400.1D2 |
| R53 | BnaA09g07410.1D2 | BnaC09g06420.1D2 |
| R53 | BnaA09g07420.1D2 | BnaC09g06430.1D2 |
| R53 | BnaA09g07440.1D2 | BnaC09g06450.1D2 |
| R53 | BnaA09g07450.1D2 | BnaC09g06460.1D2 |
| R53 | BnaA09g07460.1D2 | BnaC09g06480.1D2 |
| R53 | BnaA09g07480.1D2 | BnaC09g06510.1D2 |
| R53 | BnaA09g07490.1D2 | BnaC09g06520.1D2 |
| R53 | BnaA09g07540.1D2 | BnaC09g06590.1D2 |
| R53 | BnaA09g07650.1D2 | BnaC09g06720.1D2 |
| R53 | BnaA09g07710.1D2 | BnaC09g06790.1D2 |
| R53 | BnaA09g07740.1D2 | BnaC09g06810.1D2 |
| R53 | BnaA09g08890.1D2 | BnaC09g06910.1D2 |
| R53 | BnaA09g08910.1D2 | BnaC09g06060.1D2 |
| R53 | BnaA09g08940.1D2 | BnaC09g06090.1D2 |
| R53 | BnaA09g08950.1D2 | BnaC09g06120.1D2 |
| R53 | BnaA09g08970.1D2 | BnaC09g06140.1D2 |
| R53 | BnaA09g08990.1D2 | BnaC09g06200.1D2 |
| R53 | BnaA09g16050.1D2 | BnaC09g16030.1D2 |
| R53 | BnaA09g16050.1D2 | BnaC09g16060.1D2 |

**List of HE genes (C01 to A01)**

| <b>Accession</b> | <b>Lost gene</b> | <b>Duplicated HE gene</b> |
|------------------|------------------|---------------------------|
| Chuosenshu       | BnaC01g00010.1D2 | BnaA01g05210.1D2          |
| Chuosenshu       | BnaC01g00070.1D2 | BnaA01g05240.1D2          |
| Chuosenshu       | BnaC01g00080.1D2 | BnaA01g05250.1D2          |
| Chuosenshu       | BnaC01g00160.1D2 | BnaA01g05300.1D2          |
| Chuosenshu       | BnaC01g00220.1D2 | BnaA01g05340.1D2          |
| Chuosenshu       | BnaC01g00250.1D2 | BnaA01g05370.1D2          |
| Chuosenshu       | BnaC01g00280.1D2 | BnaA01g05410.1D2          |
| Chuosenshu       | BnaC01g00330.1D2 | BnaA01g05480.1D2          |
| Chuosenshu       | BnaC01g00370.1D2 | BnaA01g05530.1D2          |
| Chuosenshu       | BnaC01g00540.1D2 | BnaA01g05610.1D2          |
| Chuosenshu       | BnaC01g00560.1D2 | BnaA01g05600.1D2          |
| Chuosenshu       | BnaC01g00700.1D2 | BnaA01g00040.1D2          |
| Chuosenshu       | BnaC01g00730.1D2 | BnaA01g00060.1D2          |
| Chuosenshu       | BnaC01g00750.1D2 | BnaA01g00080.1D2          |
| Chuosenshu       | BnaC01g00800.1D2 | BnaA01g00130.1D2          |

|           |                  |                  |
|-----------|------------------|------------------|
| Chuosenhu | BnaC01g00810.1D2 | BnaA01g00140.1D2 |
| Chuosenhu | BnaC01g00870.1D2 | BnaA01g00190.1D2 |
| Chuosenhu | BnaC01g00890.1D2 | BnaA01g00210.1D2 |
| Chuosenhu | BnaC01g00960.1D2 | BnaA01g00260.1D2 |
| Chuosenhu | BnaC01g00990.1D2 | BnaA01g00290.1D2 |
| Chuosenhu | BnaC01g01030.1D2 | BnaA01g00330.1D2 |
| Chuosenhu | BnaC01g01070.1D2 | BnaA01g00360.1D2 |
| Chuosenhu | BnaC01g01210.1D2 | BnaA01g00560.1D2 |
| Chuosenhu | BnaC01g01220.1D2 | BnaA01g00530.1D2 |
| Chuosenhu | BnaC01g01270.1D2 | BnaA01g00590.1D2 |
| Chuosenhu | BnaC01g01290.1D2 | BnaA01g00610.1D2 |
| Chuosenhu | BnaC01g01340.1D2 | BnaA01g00660.1D2 |
| Chuosenhu | BnaC01g01440.1D2 | BnaA01g00740.1D2 |
| Chuosenhu | BnaC01g01460.1D2 | BnaA01g00760.1D2 |
| Chuosenhu | BnaC01g01490.1D2 | BnaA01g00800.1D2 |
| Chuosenhu | BnaC01g01540.1D2 | BnaA01g00840.1D2 |
| Chuosenhu | BnaC01g01550.1D2 | BnaA01g00850.1D2 |
| Chuosenhu | BnaC01g01560.1D2 | BnaA01g04930.1D2 |
| Chuosenhu | BnaC01g01610.1D2 | BnaA01g00900.1D2 |
| Chuosenhu | BnaC01g01630.1D2 | BnaA01g00920.1D2 |
| Chuosenhu | BnaC01g01650.1D2 | BnaA01g00950.1D2 |
| Chuosenhu | BnaC01g01660.1D2 | BnaA01g00960.1D2 |
| Chuosenhu | BnaC01g01760.1D2 | BnaA01g01040.1D2 |
| Chuosenhu | BnaC01g01880.1D2 | BnaA01g01170.1D2 |
| Chuosenhu | BnaC01g01890.1D2 | BnaA01g01180.1D2 |
| Chuosenhu | BnaC01g01920.1D2 | BnaA01g01230.1D2 |
| Chuosenhu | BnaC01g01990.1D2 | BnaA01g01300.1D2 |
| Chuosenhu | BnaC01g02230.1D2 | BnaA01g01520.1D2 |
| Chuosenhu | BnaC01g02250.1D2 | BnaA01g01540.1D2 |
| Chuosenhu | BnaC01g02300.1D2 | BnaA01g01590.1D2 |
| Chuosenhu | BnaC01g02310.1D2 | BnaA01g01600.1D2 |
| Chuosenhu | BnaC01g02390.1D2 | BnaA01g01670.1D2 |
| Chuosenhu | BnaC01g02420.1D2 | BnaA01g01710.1D2 |
| Chuosenhu | BnaC01g02470.1D2 | BnaA01g01760.1D2 |
| Chuosenhu | BnaC01g02490.1D2 | BnaA01g01780.1D2 |
| Chuosenhu | BnaC01g02540.1D2 | BnaA01g01830.1D2 |
| Chuosenhu | BnaC01g02570.1D2 | BnaA01g01860.1D2 |
| Chuosenhu | BnaC01g02590.1D2 | BnaA01g01880.1D2 |
| Chuosenhu | BnaC01g02610.1D2 | BnaA01g01920.1D2 |
| Chuosenhu | BnaC01g02640.1D2 | BnaA01g01950.1D2 |
| Chuosenhu | BnaC01g02670.1D2 | BnaA01g01980.1D2 |
| Chuosenhu | BnaC01g02710.1D2 | BnaA01g02030.1D2 |
| Chuosenhu | BnaC01g02820.1D2 | BnaA01g05170.1D2 |
| Chuosenhu | BnaC01g02870.1D2 | BnaA01g05200.1D2 |
| Chuosenhu | BnaC01g02910.1D2 | BnaA01g02130.1D2 |
| Chuosenhu | BnaC01g02920.1D2 | BnaA01g02140.1D2 |
| Chuosenhu | BnaC01g02980.1D2 | BnaA01g02190.1D2 |
| Chuosenhu | BnaC01g02990.1D2 | BnaA01g02200.1D2 |
| Chuosenhu | BnaC01g03000.1D2 | BnaA01g02210.1D2 |
| Chuosenhu | BnaC01g03070.1D2 | BnaA01g02280.1D2 |
| Chuosenhu | BnaC01g03080.1D2 | BnaA01g02290.1D2 |

|           |                  |                  |
|-----------|------------------|------------------|
| Chuosenhu | BnaC01g03100.1D2 | BnaA01g02310.1D2 |
| Chuosenhu | BnaC01g03110.1D2 | BnaA01g02320.1D2 |
| Chuosenhu | BnaC01g03130.1D2 | BnaA01g02340.1D2 |
| Chuosenhu | BnaC01g03150.1D2 | BnaA01g02360.1D2 |
| Chuosenhu | BnaC01g03170.1D2 | BnaA01g02380.1D2 |
| Chuosenhu | BnaC01g03200.1D2 | BnaA01g02410.1D2 |
| Chuosenhu | BnaC01g03260.1D2 | BnaA01g02470.1D2 |
| Chuosenhu | BnaC01g03270.1D2 | BnaA01g02480.1D2 |
| Chuosenhu | BnaC01g03300.1D2 | BnaA01g02500.1D2 |
| Chuosenhu | BnaC01g03360.1D2 | BnaA01g02540.1D2 |
| Chuosenhu | BnaC01g03420.1D2 | BnaA01g02580.1D2 |
| Chuosenhu | BnaC01g03480.1D2 | BnaA01g02630.1D2 |
| Chuosenhu | BnaC01g03490.1D2 | BnaA01g02630.1D2 |
| Chuosenhu | BnaC01g03500.1D2 | BnaA01g02640.1D2 |
| Chuosenhu | BnaC01g03510.1D2 | BnaA01g02650.1D2 |
| Chuosenhu | BnaC01g03520.1D2 | BnaA01g02650.1D2 |
| Chuosenhu | BnaC01g03550.1D2 | BnaA01g02700.1D2 |
| Chuosenhu | BnaC01g03560.1D2 | BnaA01g02710.1D2 |
| Chuosenhu | BnaC01g03600.1D2 | BnaA01g02760.1D2 |
| Chuosenhu | BnaC01g03630.1D2 | BnaA01g02770.1D2 |
| Chuosenhu | BnaC01g03640.1D2 | BnaA01g02770.1D2 |
| Chuosenhu | BnaC01g03670.1D2 | BnaA01g02810.1D2 |
| Chuosenhu | BnaC01g03710.1D2 | BnaA01g02850.1D2 |
| Chuosenhu | BnaC01g03720.1D2 | BnaA01g02860.1D2 |
| Chuosenhu | BnaC01g03730.1D2 | BnaA01g02870.1D2 |
| Chuosenhu | BnaC01g03740.1D2 | BnaA01g02880.1D2 |
| Chuosenhu | BnaC01g03770.1D2 | BnaA01g02900.1D2 |
| Chuosenhu | BnaC01g03820.1D2 | BnaA01g02930.1D2 |
| Chuosenhu | BnaC01g03850.1D2 | BnaA01g02960.1D2 |
| Chuosenhu | BnaC01g04000.1D2 | BnaA01g03080.1D2 |
| Chuosenhu | BnaC01g04130.1D2 | BnaA01g03190.1D2 |
| Chuosenhu | BnaC01g04160.1D2 | BnaA01g03220.1D2 |
| Chuosenhu | BnaC01g04190.1D2 | BnaA01g03250.1D2 |
| Chuosenhu | BnaC01g04200.1D2 | BnaA01g03260.1D2 |
| Chuosenhu | BnaC01g04210.1D2 | BnaA01g03270.1D2 |
| Chuosenhu | BnaC01g04230.1D2 | BnaA01g03290.1D2 |
| Chuosenhu | BnaC01g04250.1D2 | BnaA01g03310.1D2 |
| Chuosenhu | BnaC01g04270.1D2 | BnaA01g03330.1D2 |
| Chuosenhu | BnaC01g04340.1D2 | BnaA01g03390.1D2 |
| Chuosenhu | BnaC01g04370.1D2 | BnaA01g03410.1D2 |
| Chuosenhu | BnaC01g04380.1D2 | BnaA01g03420.1D2 |
| Chuosenhu | BnaC01g04460.1D2 | BnaA01g03500.1D2 |
| Chuosenhu | BnaC01g04490.1D2 | BnaA01g03530.1D2 |
| Chuosenhu | BnaC01g04530.1D2 | BnaA01g03550.1D2 |
| Chuosenhu | BnaC01g04540.1D2 | BnaA01g03560.1D2 |
| Chuosenhu | BnaC01g04570.1D2 | BnaA01g03580.1D2 |
| Chuosenhu | BnaC01g04580.1D2 | BnaA01g03590.1D2 |
| Chuosenhu | BnaC01g04590.1D2 | BnaA01g03600.1D2 |
| Chuosenhu | BnaC01g04610.1D2 | BnaA01g03630.1D2 |
| Chuosenhu | BnaC01g04660.1D2 | BnaA01g03730.1D2 |
| Chuosenhu | BnaC01g04750.1D2 | BnaA01g03790.1D2 |

|           |                  |                  |
|-----------|------------------|------------------|
| Chuosenhu | BnaC01g04800.1D2 | BnaA01g03790.1D2 |
| Chuosenhu | BnaC01g04870.1D2 | BnaA01g03850.1D2 |
| Chuosenhu | BnaC01g04890.1D2 | BnaA01g03880.1D2 |
| Chuosenhu | BnaC01g05010.1D2 | BnaA01g03980.1D2 |
| Chuosenhu | BnaC01g05070.1D2 | BnaA01g04060.1D2 |
| Chuosenhu | BnaC01g05140.1D2 | BnaA01g04130.1D2 |
| Chuosenhu | BnaC01g05150.1D2 | BnaA01g04130.1D2 |
| Chuosenhu | BnaC01g05190.1D2 | BnaA01g04160.1D2 |
| Chuosenhu | BnaC01g05210.1D2 | BnaA01g04180.1D2 |
| Chuosenhu | BnaC01g05220.1D2 | BnaA01g04190.1D2 |
| Chuosenhu | BnaC01g05240.1D2 | BnaA01g04210.1D2 |
| Chuosenhu | BnaC01g05280.1D2 | BnaA01g04250.1D2 |
| Chuosenhu | BnaC01g05300.1D2 | BnaA01g04270.1D2 |
| Chuosenhu | BnaC01g05310.1D2 | BnaA01g04280.1D2 |
| Chuosenhu | BnaC01g05320.1D2 | BnaA01g04280.1D2 |
| Chuosenhu | BnaC01g05410.1D2 | BnaA01g04340.1D2 |
| Chuosenhu | BnaC01g05450.1D2 | BnaA01g04380.1D2 |
| Chuosenhu | BnaC01g05470.1D2 | BnaA01g04400.1D2 |
| Chuosenhu | BnaC01g05510.1D2 | BnaA01g04440.1D2 |
| Chuosenhu | BnaC01g05530.1D2 | BnaA01g04460.1D2 |
| Chuosenhu | BnaC01g05560.1D2 | BnaA01g04490.1D2 |
| Chuosenhu | BnaC01g05600.1D2 | BnaA01g04530.1D2 |
| Chuosenhu | BnaC01g05730.1D2 | BnaA01g04630.1D2 |
| Chuosenhu | BnaC01g05740.1D2 | BnaA01g04640.1D2 |
| Chuosenhu | BnaC01g05810.1D2 | BnaA01g04700.1D2 |
| Chuosenhu | BnaC01g05840.1D2 | BnaA01g04730.1D2 |
| Chuosenhu | BnaC01g05860.1D2 | BnaA01g04760.1D2 |
| Chuosenhu | BnaC01g06010.1D2 | BnaA01g04810.1D2 |
| Chuosenhu | BnaC01g06070.1D2 | BnaA01g05780.1D2 |
| Chuosenhu | BnaC01g06100.1D2 | BnaA01g05820.1D2 |
| Chuosenhu | BnaC01g06140.1D2 | BnaA01g05870.1D2 |
| Chuosenhu | BnaC01g06160.1D2 | BnaA01g05890.1D2 |
| Chuosenhu | BnaC01g06180.1D2 | BnaA01g05900.1D2 |
| Chuosenhu | BnaC01g06220.1D2 | BnaA01g05930.1D2 |
| Chuosenhu | BnaC01g06260.1D2 | BnaA01g05970.1D2 |
| Chuosenhu | BnaC01g06270.1D2 | BnaA01g05980.1D2 |
| Chuosenhu | BnaC01g06280.1D2 | BnaA01g05990.1D2 |
| Chuosenhu | BnaC01g06370.1D2 | BnaA01g06060.1D2 |
| Chuosenhu | BnaC01g06380.1D2 | BnaA01g06060.1D2 |
| Chuosenhu | BnaC01g06390.1D2 | BnaA01g06070.1D2 |
| Chuosenhu | BnaC01g06490.1D2 | BnaA01g06180.1D2 |
| Chuosenhu | BnaC01g06630.1D2 | BnaA01g06400.1D2 |
| Chuosenhu | BnaC01g06640.1D2 | BnaA01g06410.1D2 |
| Chuosenhu | BnaC01g06650.1D2 | BnaA01g06420.1D2 |
| Chuosenhu | BnaC01g06880.1D2 | BnaA01g06550.1D2 |
| Chuosenhu | BnaC01g06970.1D2 | BnaA01g06610.1D2 |
| Chuosenhu | BnaC01g07010.1D2 | BnaA01g06640.1D2 |
| Chuosenhu | BnaC01g07100.1D2 | BnaA01g06740.1D2 |
| Chuosenhu | BnaC01g07570.1D2 | BnaA01g03470.1D2 |
| Chuosenhu | BnaC01g07590.1D2 | BnaA01g05950.1D2 |
| Chuosenhu | BnaC01g07610.1D2 | BnaA01g02780.1D2 |

|              |                  |                  |
|--------------|------------------|------------------|
| Chuosenshu   | BnaC01g07710.1D2 | BnaA01g05070.1D2 |
| Chuosenshu   | BnaC01g32640.1D2 | BnaA01g28570.1D2 |
| Chuosenshu   | BnaC01g33270.1D2 | BnaA01g28660.1D2 |
| GSchnittkohl | BnaC01g00070.1D2 | BnaA01g05240.1D2 |
| GSchnittkohl | BnaC01g00120.1D2 | BnaA01g05270.1D2 |
| GSchnittkohl | BnaC01g00160.1D2 | BnaA01g05300.1D2 |
| GSchnittkohl | BnaC01g00260.1D2 | BnaA01g05380.1D2 |
| GSchnittkohl | BnaC01g00280.1D2 | BnaA01g05410.1D2 |
| GSchnittkohl | BnaC01g00320.1D2 | BnaA01g05480.1D2 |
| GSchnittkohl | BnaC01g00330.1D2 | BnaA01g05480.1D2 |
| GSchnittkohl | BnaC01g00340.1D2 | BnaA01g05490.1D2 |
| GSchnittkohl | BnaC01g00370.1D2 | BnaA01g05530.1D2 |
| GSchnittkohl | BnaC01g00570.1D2 | BnaA01g05550.1D2 |
| GSchnittkohl | BnaC01g00630.1D2 | BnaA01g05670.1D2 |
| GSchnittkohl | BnaC01g00700.1D2 | BnaA01g00040.1D2 |
| GSchnittkohl | BnaC01g00710.1D2 | BnaA01g00050.1D2 |
| GSchnittkohl | BnaC01g00730.1D2 | BnaA01g00060.1D2 |
| GSchnittkohl | BnaC01g00770.1D2 | BnaA01g00100.1D2 |
| GSchnittkohl | BnaC01g00800.1D2 | BnaA01g00130.1D2 |
| GSchnittkohl | BnaC01g00810.1D2 | BnaA01g00140.1D2 |
| GSchnittkohl | BnaC01g00850.1D2 | BnaA01g00170.1D2 |
| GSchnittkohl | BnaC01g00860.1D2 | BnaA01g00180.1D2 |
| GSchnittkohl | BnaC01g00870.1D2 | BnaA01g00190.1D2 |
| GSchnittkohl | BnaC01g00890.1D2 | BnaA01g00210.1D2 |
| GSchnittkohl | BnaC01g00960.1D2 | BnaA01g00260.1D2 |
| GSchnittkohl | BnaC01g00980.1D2 | BnaA01g00280.1D2 |
| GSchnittkohl | BnaC01g01030.1D2 | BnaA01g00330.1D2 |
| GSchnittkohl | BnaC01g01070.1D2 | BnaA01g00360.1D2 |
| GSchnittkohl | BnaC01g01120.1D2 | BnaA01g00410.1D2 |
| GSchnittkohl | BnaC01g01210.1D2 | BnaA01g00560.1D2 |
| GSchnittkohl | BnaC01g01220.1D2 | BnaA01g00530.1D2 |
| GSchnittkohl | BnaC01g01270.1D2 | BnaA01g00590.1D2 |
| GSchnittkohl | BnaC01g01350.1D2 | BnaA01g00670.1D2 |
| GSchnittkohl | BnaC01g01400.1D2 | BnaA01g00710.1D2 |
| GSchnittkohl | BnaC01g01440.1D2 | BnaA01g00740.1D2 |
| GSchnittkohl | BnaC01g01460.1D2 | BnaA01g00760.1D2 |
| GSchnittkohl | BnaC01g01480.1D2 | BnaA01g00790.1D2 |
| GSchnittkohl | BnaC01g01490.1D2 | BnaA01g00800.1D2 |
| GSchnittkohl | BnaC01g01530.1D2 | BnaA01g00830.1D2 |
| GSchnittkohl | BnaC01g01540.1D2 | BnaA01g00840.1D2 |
| GSchnittkohl | BnaC01g01550.1D2 | BnaA01g00850.1D2 |
| GSchnittkohl | BnaC01g01560.1D2 | BnaA01g04930.1D2 |
| GSchnittkohl | BnaC01g01600.1D2 | BnaA01g00890.1D2 |
| GSchnittkohl | BnaC01g01610.1D2 | BnaA01g00900.1D2 |
| GSchnittkohl | BnaC01g01630.1D2 | BnaA01g00920.1D2 |
| GSchnittkohl | BnaC01g01650.1D2 | BnaA01g00950.1D2 |
| GSchnittkohl | BnaC01g01690.1D2 | BnaA01g00990.1D2 |
| GSchnittkohl | BnaC01g01700.1D2 | BnaA01g01000.1D2 |
| GSchnittkohl | BnaC01g01880.1D2 | BnaA01g01160.1D2 |
| GSchnittkohl | BnaC01g01880.1D2 | BnaA01g01170.1D2 |
| GSchnittkohl | BnaC01g01890.1D2 | BnaA01g01180.1D2 |

|              |                  |                  |
|--------------|------------------|------------------|
| GSchnittkohl | BnaC01g01920.1D2 | BnaA01g01230.1D2 |
| GSchnittkohl | BnaC01g01930.1D2 | BnaA01g01240.1D2 |
| GSchnittkohl | BnaC01g01940.1D2 | BnaA01g01250.1D2 |
| GSchnittkohl | BnaC01g01990.1D2 | BnaA01g01300.1D2 |
| GSchnittkohl | BnaC01g02000.1D2 | BnaA01g01310.1D2 |
| GSchnittkohl | BnaC01g02130.1D2 | BnaA01g01420.1D2 |
| GSchnittkohl | BnaC01g02210.1D2 | BnaA01g01500.1D2 |
| GSchnittkohl | BnaC01g02230.1D2 | BnaA01g01520.1D2 |
| GSchnittkohl | BnaC01g02250.1D2 | BnaA01g01540.1D2 |
| GSchnittkohl | BnaC01g02300.1D2 | BnaA01g01590.1D2 |
| GSchnittkohl | BnaC01g02330.1D2 | BnaA01g01620.1D2 |
| GSchnittkohl | BnaC01g02390.1D2 | BnaA01g01670.1D2 |
| GSchnittkohl | BnaC01g02470.1D2 | BnaA01g01760.1D2 |
| GSchnittkohl | BnaC01g02490.1D2 | BnaA01g01780.1D2 |
| GSchnittkohl | BnaC01g02520.1D2 | BnaA01g01810.1D2 |
| GSchnittkohl | BnaC01g02540.1D2 | BnaA01g01830.1D2 |
| GSchnittkohl | BnaC01g02560.1D2 | BnaA01g01850.1D2 |
| GSchnittkohl | BnaC01g02570.1D2 | BnaA01g01860.1D2 |
| GSchnittkohl | BnaC01g02610.1D2 | BnaA01g01920.1D2 |
| GSchnittkohl | BnaC01g02640.1D2 | BnaA01g01950.1D2 |
| GSchnittkohl | BnaC01g02830.1D2 | BnaA01g05180.1D2 |
| GSchnittkohl | BnaC01g02870.1D2 | BnaA01g05200.1D2 |
| GSchnittkohl | BnaC01g02960.1D2 | BnaA01g02170.1D2 |
| GSchnittkohl | BnaC01g03070.1D2 | BnaA01g02280.1D2 |
| GSchnittkohl | BnaC01g03230.1D2 | BnaA01g02440.1D2 |
| GSchnittkohl | BnaC01g03260.1D2 | BnaA01g02470.1D2 |
| GSchnittkohl | BnaC01g03270.1D2 | BnaA01g02480.1D2 |
| GSchnittkohl | BnaC01g03480.1D2 | BnaA01g02630.1D2 |
| GSchnittkohl | BnaC01g03490.1D2 | BnaA01g02630.1D2 |
| GSchnittkohl | BnaC01g03600.1D2 | BnaA01g02760.1D2 |
| GSchnittkohl | BnaC01g03730.1D2 | BnaA01g02870.1D2 |
| GSchnittkohl | BnaC01g03740.1D2 | BnaA01g02880.1D2 |
| GSchnittkohl | BnaC01g03820.1D2 | BnaA01g02930.1D2 |
| GSchnittkohl | BnaC01g04000.1D2 | BnaA01g03080.1D2 |
| GSchnittkohl | BnaC01g04050.1D2 | BnaA01g03130.1D2 |
| GSchnittkohl | BnaC01g04160.1D2 | BnaA01g03220.1D2 |
| GSchnittkohl | BnaC01g04210.1D2 | BnaA01g03270.1D2 |
| GSchnittkohl | BnaC01g04220.1D2 | BnaA01g03280.1D2 |
| GSchnittkohl | BnaC01g04320.1D2 | BnaA01g03380.1D2 |
| GSchnittkohl | BnaC01g04440.1D2 | BnaA01g03480.1D2 |
| GSchnittkohl | BnaC01g04460.1D2 | BnaA01g03500.1D2 |
| GSchnittkohl | BnaC01g04580.1D2 | BnaA01g03590.1D2 |
| GSchnittkohl | BnaC01g04590.1D2 | BnaA01g03600.1D2 |
| GSchnittkohl | BnaC01g04700.1D2 | BnaA01g03780.1D2 |
| GSchnittkohl | BnaC01g04830.1D2 | BnaA01g03810.1D2 |
| GSchnittkohl | BnaC01g04840.1D2 | BnaA01g03820.1D2 |
| GSchnittkohl | BnaC01g04980.1D2 | BnaA01g04920.1D2 |
| GSchnittkohl | BnaC01g05010.1D2 | BnaA01g03980.1D2 |
| GSchnittkohl | BnaC01g05040.1D2 | BnaA01g04030.1D2 |
| GSchnittkohl | BnaC01g05070.1D2 | BnaA01g04060.1D2 |
| GSchnittkohl | BnaC01g05100.1D2 | BnaA01g04100.1D2 |

|              |                  |                  |
|--------------|------------------|------------------|
| GSchnittkohl | BnaC01g05150.1D2 | BnaA01g04130.1D2 |
| GSchnittkohl | BnaC01g05210.1D2 | BnaA01g04180.1D2 |
| GSchnittkohl | BnaC01g05300.1D2 | BnaA01g04270.1D2 |
| GSchnittkohl | BnaC01g05310.1D2 | BnaA01g04280.1D2 |
| GSchnittkohl | BnaC01g05320.1D2 | BnaA01g04280.1D2 |
| GSchnittkohl | BnaC01g05340.1D2 | BnaA01g04300.1D2 |
| GSchnittkohl | BnaC01g05360.1D2 | BnaA01g04310.1D2 |
| GSchnittkohl | BnaC01g05410.1D2 | BnaA01g04340.1D2 |
| GSchnittkohl | BnaC01g05470.1D2 | BnaA01g04400.1D2 |
| GSchnittkohl | BnaC01g05480.1D2 | BnaA01g04410.1D2 |
| GSchnittkohl | BnaC01g05500.1D2 | BnaA01g04430.1D2 |
| GSchnittkohl | BnaC01g05600.1D2 | BnaA01g04530.1D2 |
| GSchnittkohl | BnaC01g05690.1D2 | BnaA01g04600.1D2 |
| GSchnittkohl | BnaC01g05740.1D2 | BnaA01g04640.1D2 |
| GSchnittkohl | BnaC01g05790.1D2 | BnaA01g04680.1D2 |
| GSchnittkohl | BnaC01g05810.1D2 | BnaA01g04700.1D2 |
| GSchnittkohl | BnaC01g05840.1D2 | BnaA01g04730.1D2 |
| GSchnittkohl | BnaC01g05970.1D2 | BnaA01g04850.1D2 |
| GSchnittkohl | BnaC01g07550.1D2 | BnaA01g05690.1D2 |
| GSchnittkohl | BnaC01g07570.1D2 | BnaA01g03470.1D2 |
| GSchnittkohl | BnaC01g07640.1D2 | BnaA01g04060.1D2 |
| GSchnittkohl | BnaC01g07650.1D2 | BnaA01g04070.1D2 |
| GSchnittkohl | BnaC01g07670.1D2 | BnaA01g04070.1D2 |
| GSchnittkohl | BnaC01g07710.1D2 | BnaA01g05070.1D2 |
| GSchnittkohl | BnaC01g14850.1D2 | BnaA01g13290.1D2 |
| GSchnittkohl | BnaC01g14870.1D2 | BnaA01g13310.1D2 |
| GSchnittkohl | BnaC01g14900.1D2 | BnaA01g13320.1D2 |
| GSchnittkohl | BnaC01g14920.1D2 | BnaA01g13340.1D2 |
| GSchnittkohl | BnaC01g14950.1D2 | BnaA01g13360.1D2 |
| GSchnittkohl | BnaC01g14970.1D2 | BnaA01g13380.1D2 |
| GSchnittkohl | BnaC01g14990.1D2 | BnaA01g13400.1D2 |
| GSchnittkohl | BnaC01g15000.1D2 | BnaA01g13410.1D2 |
| GSchnittkohl | BnaC01g15580.1D2 | BnaA01g13270.1D2 |
| GSchnittkohl | BnaC01g29960.1D2 | BnaA01g25990.1D2 |
| GSchnittkohl | BnaC01g29970.1D2 | BnaA01g29010.1D2 |
| GSchnittkohl | BnaC01g30040.1D2 | BnaA01g26070.1D2 |
| GSchnittkohl | BnaC01g30120.1D2 | BnaA01g26120.1D2 |
| GSchnittkohl | BnaC01g30250.1D2 | BnaA01g26250.1D2 |
| GSchnittkohl | BnaC01g30270.1D2 | BnaA01g26260.1D2 |
| GSchnittkohl | BnaC01g30380.1D2 | BnaA01g26370.1D2 |
| GSchnittkohl | BnaC01g30390.1D2 | BnaA01g26380.1D2 |
| GSchnittkohl | BnaC01g30410.1D2 | BnaA01g26400.1D2 |
| GSchnittkohl | BnaC01g30480.1D2 | BnaA01g26540.1D2 |
| GSchnittkohl | BnaC01g30490.1D2 | BnaA01g26550.1D2 |
| GSchnittkohl | BnaC01g30570.1D2 | BnaA01g26630.1D2 |
| GSchnittkohl | BnaC01g30580.1D2 | BnaA01g26640.1D2 |
| GSchnittkohl | BnaC01g30670.1D2 | BnaA01g26700.1D2 |
| GSchnittkohl | BnaC01g30780.1D2 | BnaA01g26790.1D2 |
| GSchnittkohl | BnaC01g30840.1D2 | BnaA01g26930.1D2 |
| GSchnittkohl | BnaC01g30860.1D2 | BnaA01g26950.1D2 |
| GSchnittkohl | BnaC01g31310.1D2 | BnaA01g27120.1D2 |

|              |                  |                  |
|--------------|------------------|------------------|
| GSchnittkohl | BnaC01g31430.1D2 | BnaA01g27570.1D2 |
| GSchnittkohl | BnaC01g31570.1D2 | BnaA01g27310.1D2 |
| GSchnittkohl | BnaC01g31600.1D2 | BnaA01g27350.1D2 |
| GSchnittkohl | BnaC01g31620.1D2 | BnaA01g27350.1D2 |
| GSchnittkohl | BnaC01g31640.1D2 | BnaA01g27370.1D2 |
| GSchnittkohl | BnaC01g31680.1D2 | BnaA01g27420.1D2 |
| GSchnittkohl | BnaC01g31780.1D2 | BnaA01g27760.1D2 |
| GSchnittkohl | BnaC01g31920.1D2 | BnaA01g27900.1D2 |
| GSchnittkohl | BnaC01g31930.1D2 | BnaA01g27910.1D2 |
| GSchnittkohl | BnaC01g31970.1D2 | BnaA01g27930.1D2 |
| GSchnittkohl | BnaC01g32010.1D2 | BnaA01g27660.1D2 |
| GSchnittkohl | BnaC01g32160.1D2 | BnaA01g27210.1D2 |
| GSchnittkohl | BnaC01g32280.1D2 | BnaA01g28060.1D2 |
| GSchnittkohl | BnaC01g32300.1D2 | BnaA01g28090.1D2 |
| GSchnittkohl | BnaC01g32410.1D2 | BnaA01g28200.1D2 |
| GSchnittkohl | BnaC01g32420.1D2 | BnaA01g28210.1D2 |
| GSchnittkohl | BnaC01g32490.1D2 | BnaA01g28270.1D2 |
| GSchnittkohl | BnaC01g32500.1D2 | BnaA01g28280.1D2 |
| GSchnittkohl | BnaC01g32530.1D2 | BnaA01g28900.1D2 |
| GSchnittkohl | BnaC01g32710.1D2 | BnaA01g28490.1D2 |
| GSchnittkohl | BnaC01g32870.1D2 | BnaA01g27980.1D2 |
| GSchnittkohl | BnaC01g32880.1D2 | BnaA01g27990.1D2 |
| GSchnittkohl | BnaC01g32890.1D2 | BnaA01g28000.1D2 |
| GSchnittkohl | BnaC01g32940.1D2 | BnaA01g26430.1D2 |
| GSchnittkohl | BnaC01g32980.1D2 | BnaA01g28370.1D2 |
| GSchnittkohl | BnaC01g33010.1D2 | BnaA01g28990.1D2 |
| GSchnittkohl | BnaC01g33240.1D2 | BnaA01g28640.1D2 |
| GSchnittkohl | BnaC01g33270.1D2 | BnaA01g28660.1D2 |
| GSchnittkohl | BnaC01g33310.1D2 | BnaA01g28700.1D2 |
| GSchnittkohl | BnaC01g33380.1D2 | BnaA01g28750.1D2 |
| GSchnittkohl | BnaC01g33590.1D2 | BnaA01g27500.1D2 |
| GSchnittkohl | BnaC01g33660.1D2 | BnaA01g30720.1D2 |
| GSchnittkohl | BnaC01g33680.1D2 | BnaA01g30750.1D2 |
| GSchnittkohl | BnaC01g33720.1D2 | BnaA01g30780.1D2 |
| GSchnittkohl | BnaC01g33720.1D2 | BnaA01g31090.1D2 |
| GSchnittkohl | BnaC01g33730.1D2 | BnaA01g30780.1D2 |
| GSchnittkohl | BnaC01g33730.1D2 | BnaA01g31080.1D2 |
| GSchnittkohl | BnaC01g33780.1D2 | BnaA01g31050.1D2 |
| GSchnittkohl | BnaC01g33900.1D2 | BnaA01g30940.1D2 |
| GSchnittkohl | BnaC01g33940.1D2 | BnaA01g30970.1D2 |
| GSchnittkohl | BnaC01g33950.1D2 | BnaA01g30980.1D2 |
| GSchnittkohl | BnaC01g33970.1D2 | BnaA01g30990.1D2 |
| GSchnittkohl | BnaC01g34040.1D2 | BnaA01g32620.1D2 |
| GSchnittkohl | BnaC01g34070.1D2 | BnaA01g32660.1D2 |
| GSchnittkohl | BnaC01g34160.1D2 | BnaA01g31000.1D2 |
| GSchnittkohl | BnaC01g34180.1D2 | BnaA01g31010.1D2 |
| GSchnittkohl | BnaC01g34230.1D2 | BnaA01g31760.1D2 |
| GSchnittkohl | BnaC01g34240.1D2 | BnaA01g31740.1D2 |
| GSchnittkohl | BnaC01g34270.1D2 | BnaA01g31710.1D2 |
| GSchnittkohl | BnaC01g34300.1D2 | BnaA01g31650.1D2 |
| GSchnittkohl | BnaC01g34350.1D2 | BnaA01g31670.1D2 |



|              |                  |                  |
|--------------|------------------|------------------|
| GSchnittkohl | BnaC01g34510.1D2 | BnaA01g29210.1D2 |
| GSchnittkohl | BnaC01g34520.1D2 | BnaA01g29220.1D2 |
| GSchnittkohl | BnaC01g34550.1D2 | BnaA01g31130.1D2 |
| GSchnittkohl | BnaC01g34560.1D2 | BnaA01g31140.1D2 |
| GSchnittkohl | BnaC01g34620.1D2 | BnaA01g31170.1D2 |
| GSchnittkohl | BnaC01g34770.1D2 | BnaA01g31300.1D2 |
| GSchnittkohl | BnaC01g34850.1D2 | BnaA01g31340.1D2 |
| GSchnittkohl | BnaC01g34860.1D2 | BnaA01g31340.1D2 |
| GSchnittkohl | BnaC01g34870.1D2 | BnaA01g31350.1D2 |
| GSchnittkohl | BnaC01g34880.1D2 | BnaA01g31360.1D2 |
| GSchnittkohl | BnaC01g35010.1D2 | BnaA01g31480.1D2 |
| GSchnittkohl | BnaC01g35030.1D2 | BnaA01g31490.1D2 |
| GSchnittkohl | BnaC01g35060.1D2 | BnaA01g31550.1D2 |
| GSchnittkohl | BnaC01g35070.1D2 | BnaA01g31550.1D2 |
| GSchnittkohl | BnaC01g35100.1D2 | BnaA01g31580.1D2 |
| GSchnittkohl | BnaC01g35110.1D2 | BnaA01g31590.1D2 |
| GSchnittkohl | BnaC01g35200.1D2 | BnaA01g32600.1D2 |
| GSchnittkohl | BnaC01g35360.1D2 | BnaA01g32290.1D2 |
| GSchnittkohl | BnaC01g35380.1D2 | BnaA01g32260.1D2 |
| GSchnittkohl | BnaC01g35470.1D2 | BnaA01g33590.1D2 |
| GSchnittkohl | BnaC01g35520.1D2 | BnaA01g33670.1D2 |
| GSchnittkohl | BnaC01g35530.1D2 | BnaA01g33680.1D2 |
| GSchnittkohl | BnaC01g35550.1D2 | BnaA01g33710.1D2 |
| GSchnittkohl | BnaC01g35590.1D2 | BnaA01g33760.1D2 |
| GSchnittkohl | BnaC01g35640.1D2 | BnaA01g33780.1D2 |
| GSchnittkohl | BnaC01g35680.1D2 | BnaA01g33810.1D2 |
| GSchnittkohl | BnaC01g35700.1D2 | BnaA01g33830.1D2 |
| GSchnittkohl | BnaC01g35710.1D2 | BnaA01g33840.1D2 |
| GSchnittkohl | BnaC01g35730.1D2 | BnaA01g33860.1D2 |
| GSchnittkohl | BnaC01g36800.1D2 | BnaA01g35230.1D2 |
| GSchnittkohl | BnaC01g36840.1D2 | BnaA01g35260.1D2 |
| GSchnittkohl | BnaC01g36980.1D2 | BnaA01g35370.1D2 |
| GSchnittkohl | BnaC01g37390.1D2 | BnaA01g35770.1D2 |
| Sensation    | BnaC01g00250.1D2 | BnaA01g05370.1D2 |
| Sensation    | BnaC01g06750.1D2 | BnaA01g31260.1D2 |
| Sensation    | BnaC01g31290.1D2 | BnaA01g27100.1D2 |
| Sensation    | BnaC01g31300.1D2 | BnaA01g27110.1D2 |
| Sensation    | BnaC01g31310.1D2 | BnaA01g27120.1D2 |
| Sensation    | BnaC01g31330.1D2 | BnaA01g27140.1D2 |
| Sensation    | BnaC01g31340.1D2 | BnaA01g27180.1D2 |
| Sensation    | BnaC01g31430.1D2 | BnaA01g27570.1D2 |
| Sensation    | BnaC01g31480.1D2 | BnaA01g27610.1D2 |
| Sensation    | BnaC01g31780.1D2 | BnaA01g27760.1D2 |
| Sensation    | BnaC01g32010.1D2 | BnaA01g27660.1D2 |
| Sensation    | BnaC01g32110.1D2 | BnaA01g27260.1D2 |
| Sensation    | BnaC01g32140.1D2 | BnaA01g27230.1D2 |
| Sensation    | BnaC01g32500.1D2 | BnaA01g28280.1D2 |
| Sensation    | BnaC01g32640.1D2 | BnaA01g28570.1D2 |
| Sensation    | BnaC01g32870.1D2 | BnaA01g27980.1D2 |
| Sensation    | BnaC01g32980.1D2 | BnaA01g28370.1D2 |
| Sensation    | BnaC01g33010.1D2 | BnaA01g28990.1D2 |

|           |                  |                  |
|-----------|------------------|------------------|
| Sensation | BnaC01g33380.1D2 | BnaA01g28750.1D2 |
| Sensation | BnaC01g33430.1D2 | BnaA01g28790.1D2 |
| Sensation | BnaC01g33630.1D2 | BnaA01g30690.1D2 |
| Sensation | BnaC01g33690.1D2 | BnaA01g30760.1D2 |
| Sensation | BnaC01g33720.1D2 | BnaA01g31090.1D2 |
| Sensation | BnaC01g33730.1D2 | BnaA01g31080.1D2 |
| Sensation | BnaC01g33850.1D2 | BnaA01g30880.1D2 |
| Sensation | BnaC01g33890.1D2 | BnaA01g30930.1D2 |
| Sensation | BnaC01g33900.1D2 | BnaA01g30940.1D2 |
| Sensation | BnaC01g33910.1D2 | BnaA01g30950.1D2 |
| Sensation | BnaC01g33940.1D2 | BnaA01g30970.1D2 |
| Sensation | BnaC01g33950.1D2 | BnaA01g30980.1D2 |
| Sensation | BnaC01g33970.1D2 | BnaA01g30990.1D2 |
| Sensation | BnaC01g34090.1D2 | BnaA01g32680.1D2 |
| Sensation | BnaC01g34110.1D2 | BnaA01g32690.1D2 |
| Sensation | BnaC01g34180.1D2 | BnaA01g31010.1D2 |
| Sensation | BnaC01g34200.1D2 | BnaA01g31770.1D2 |
| Sensation | BnaC01g34230.1D2 | BnaA01g31760.1D2 |
| Sensation | BnaC01g34270.1D2 | BnaA01g31710.1D2 |
| Sensation | BnaC01g34310.1D2 | BnaA01g31700.1D2 |
| Sensation | BnaC01g34320.1D2 | BnaA01g31690.1D2 |
| Sensation | BnaC01g34330.1D2 | BnaA01g31680.1D2 |
| Sensation | BnaC01g34350.1D2 | BnaA01g31670.1D2 |
| Sensation | BnaC01g34690.1D2 | BnaA01g31230.1D2 |
| Sensation | BnaC01g34700.1D2 | BnaA01g31240.1D2 |
| Sensation | BnaC01g34720.1D2 | BnaA01g31260.1D2 |
| Sensation | BnaC01g34750.1D2 | BnaA01g31280.1D2 |
| Sensation | BnaC01g34760.1D2 | BnaA01g31290.1D2 |
| Sensation | BnaC01g34770.1D2 | BnaA01g31300.1D2 |
| Sensation | BnaC01g34850.1D2 | BnaA01g31340.1D2 |
| Sensation | BnaC01g34860.1D2 | BnaA01g31340.1D2 |
| Sensation | BnaC01g34890.1D2 | BnaA01g31380.1D2 |
| Sensation | BnaC01g34910.1D2 | BnaA01g31400.1D2 |
| Sensation | BnaC01g34920.1D2 | BnaA01g31400.1D2 |
| Sensation | BnaC01g34960.1D2 | BnaA01g31430.1D2 |
| Sensation | BnaC01g34970.1D2 | BnaA01g31440.1D2 |
| Sensation | BnaC01g35010.1D2 | BnaA01g31480.1D2 |
| Sensation | BnaC01g35020.1D2 | BnaA01g31490.1D2 |
| Sensation | BnaC01g35030.1D2 | BnaA01g31490.1D2 |
| Sensation | BnaC01g35060.1D2 | BnaA01g31550.1D2 |
| Sensation | BnaC01g35100.1D2 | BnaA01g31580.1D2 |
| Sensation | BnaC01g35110.1D2 | BnaA01g31590.1D2 |
| Sensation | BnaC01g35370.1D2 | BnaA01g32280.1D2 |
| Sensation | BnaC01g35390.1D2 | BnaA01g32250.1D2 |
| Sensation | BnaC01g35550.1D2 | BnaA01g33710.1D2 |
| Sensation | BnaC01g35730.1D2 | BnaA01g33860.1D2 |
| Sensation | BnaC01g36530.1D2 | BnaA01g29060.1D2 |
| CRY_1     | BnaC01g00070.1D2 | BnaA01g05240.1D2 |
| CRY_1     | BnaC01g00080.1D2 | BnaA01g05250.1D2 |
| CRY_1     | BnaC01g00090.1D2 | BnaA01g05260.1D2 |
| CRY_1     | BnaC01g00120.1D2 | BnaA01g05270.1D2 |

|       |                  |                  |
|-------|------------------|------------------|
| CRY_1 | BnaC01g00320.1D2 | BnaA01g05480.1D2 |
| CRY_1 | BnaC01g00810.1D2 | BnaA01g00140.1D2 |
| CRY_1 | BnaC01g00920.1D2 | BnaA01g04950.1D2 |
| CRY_1 | BnaC01g00960.1D2 | BnaA01g00260.1D2 |
| CRY_1 | BnaC01g01180.1D2 | BnaA01g00490.1D2 |
| CRY_1 | BnaC01g01220.1D2 | BnaA01g00530.1D2 |
| CRY_1 | BnaC01g01230.1D2 | BnaA01g00540.1D2 |
| CRY_1 | BnaC01g01550.1D2 | BnaA01g00850.1D2 |
| CRY_1 | BnaC01g01760.1D2 | BnaA01g01040.1D2 |
| CRY_1 | BnaC01g01940.1D2 | BnaA01g01250.1D2 |
| CRY_1 | BnaC01g02250.1D2 | BnaA01g19070.1D2 |
| CRY_1 | BnaC01g02710.1D2 | BnaA01g02030.1D2 |
| CRY_1 | BnaC01g02870.1D2 | BnaA01g05200.1D2 |
| CRY_1 | BnaC01g02970.1D2 | BnaA01g02180.1D2 |
| CRY_1 | BnaC01g03090.1D2 | BnaA01g02300.1D2 |
| CRY_1 | BnaC01g03100.1D2 | BnaA01g02310.1D2 |
| CRY_1 | BnaC01g03310.1D2 | BnaA01g02510.1D2 |
| CRY_1 | BnaC01g03820.1D2 | BnaA01g02930.1D2 |
| CRY_1 | BnaC01g04190.1D2 | BnaA01g03250.1D2 |
| CRY_1 | BnaC01g04220.1D2 | BnaA01g03280.1D2 |
| CRY_1 | BnaC01g04440.1D2 | BnaA01g03480.1D2 |
| CRY_1 | BnaC01g04490.1D2 | BnaA01g03530.1D2 |
| CRY_1 | BnaC01g04720.1D2 | BnaA01g03430.1D2 |
| CRY_1 | BnaC01g04750.1D2 | BnaA01g03790.1D2 |
| CRY_1 | BnaC01g04830.1D2 | BnaA01g03810.1D2 |
| CRY_1 | BnaC01g04840.1D2 | BnaA01g03820.1D2 |
| CRY_1 | BnaC01g04930.1D2 | BnaA01g03890.1D2 |
| CRY_1 | BnaC01g05360.1D2 | BnaA01g04310.1D2 |
| CRY_1 | BnaC01g05840.1D2 | BnaA01g04730.1D2 |
| CRY_1 | BnaC01g06220.1D2 | BnaA01g05930.1D2 |
| CRY_1 | BnaC01g06370.1D2 | BnaA01g06060.1D2 |
| CRY_1 | BnaC01g06380.1D2 | BnaA01g06060.1D2 |
| CRY_1 | BnaC01g06650.1D2 | BnaA01g06420.1D2 |
| CRY_1 | BnaC01g06880.1D2 | BnaA01g06550.1D2 |
| CRY_1 | BnaC01g07650.1D2 | BnaA01g04070.1D2 |
| CRY_1 | BnaC01g07710.1D2 | BnaA01g05070.1D2 |
| CRY_1 | BnaC01g08010.1D2 | BnaA01g07190.1D2 |
| CRY_1 | BnaC01g08690.1D2 | BnaA01g07960.1D2 |
| CRY_1 | BnaC01g09070.1D2 | BnaA01g11730.1D2 |
| CRY_1 | BnaC01g09080.1D2 | BnaA01g11730.1D2 |
| CRY_1 | BnaC01g09670.1D2 | BnaA01g08780.1D2 |
| CRY_1 | BnaC01g09870.1D2 | BnaA01g09000.1D2 |
| CRY_1 | BnaC01g09990.1D2 | BnaA01g02350.1D2 |
| CRY_1 | BnaC01g10400.1D2 | BnaA01g09530.1D2 |
| CRY_1 | BnaC01g10440.1D2 | BnaA01g09570.1D2 |
| CRY_1 | BnaC01g10830.1D2 | BnaA01g08880.1D2 |
| CRY_1 | BnaC01g11070.1D2 | BnaA01g09910.1D2 |
| CRY_1 | BnaC01g11090.1D2 | BnaA01g09930.1D2 |
| CRY_1 | BnaC01g11330.1D2 | BnaA01g10150.1D2 |
| CRY_1 | BnaC01g12080.1D2 | BnaA01g10820.1D2 |
| CRY_1 | BnaC01g12710.1D2 | BnaA01g11400.1D2 |

|       |                  |                  |
|-------|------------------|------------------|
| CRY_1 | BnaC01g13740.1D2 | BnaA01g12610.1D2 |
| CRY_1 | BnaC01g13980.1D2 | BnaA01g12480.1D2 |
| CRY_1 | BnaC01g14190.1D2 | BnaA01g12950.1D2 |
| CRY_1 | BnaC01g14580.1D2 | BnaA01g13000.1D2 |
| CRY_1 | BnaC01g14620.1D2 | BnaA01g13040.1D2 |
| CRY_1 | BnaC01g14700.1D2 | BnaA01g13120.1D2 |
| CRY_1 | BnaC01g15040.1D2 | BnaA01g13450.1D2 |
| CRY_1 | BnaC01g15140.1D2 | BnaA01g13560.1D2 |
| CRY_1 | BnaC01g15340.1D2 | BnaA01g13770.1D2 |
| CRY_1 | BnaC01g15380.1D2 | BnaA01g13810.1D2 |
| CRY_1 | BnaC01g15730.1D2 | BnaA01g12170.1D2 |
| CRY_1 | BnaC01g16210.1D2 | BnaA01g14340.1D2 |
| CRY_1 | BnaC01g16320.1D2 | BnaA01g14400.1D2 |
| CRY_1 | BnaC01g16370.1D2 | BnaA01g14460.1D2 |
| CRY_1 | BnaC01g16640.1D2 | BnaA01g14700.1D2 |
| CRY_1 | BnaC01g16910.1D2 | BnaA01g14920.1D2 |
| CRY_1 | BnaC01g17190.1D2 | BnaA01g15120.1D2 |
| CRY_1 | BnaC01g17250.1D2 | BnaA01g14120.1D2 |
| CRY_1 | BnaC01g17290.1D2 | BnaA01g14550.1D2 |
| CRY_1 | BnaC01g17630.1D2 | BnaA01g15410.1D2 |
| CRY_1 | BnaC01g17650.1D2 | BnaA01g15410.1D2 |
| CRY_1 | BnaC01g17650.1D2 | BnaA01g15440.1D2 |
| CRY_1 | BnaC01g17660.1D2 | BnaA01g15410.1D2 |
| CRY_1 | BnaC01g17660.1D2 | BnaA01g15440.1D2 |
| CRY_1 | BnaC01g17810.1D2 | BnaA01g15630.1D2 |
| CRY_1 | BnaC01g17910.1D2 | BnaA01g15740.1D2 |
| CRY_1 | BnaC01g18080.1D2 | BnaA01g24250.1D2 |
| CRY_1 | BnaC01g18290.1D2 | BnaA01g15830.1D2 |
| CRY_1 | BnaC01g18330.1D2 | BnaA01g15880.1D2 |
| CRY_1 | BnaC01g18930.1D2 | BnaA01g16270.1D2 |
| CRY_1 | BnaC01g19240.1D2 | BnaA01g17460.1D2 |
| CRY_1 | BnaC01g19890.1D2 | BnaA01g17170.1D2 |
| CRY_1 | BnaC01g20160.1D2 | BnaA01g17810.1D2 |
| CRY_1 | BnaC01g20340.1D2 | BnaA01g17990.1D2 |
| CRY_1 | BnaC01g20480.1D2 | BnaA01g24790.1D2 |
| CRY_1 | BnaC01g20610.1D2 | BnaA01g18300.1D2 |
| CRY_1 | BnaC01g20740.1D2 | BnaA01g18490.1D2 |
| CRY_1 | BnaC01g21030.1D2 | BnaA01g18640.1D2 |
| CRY_1 | BnaC01g21240.1D2 | BnaA01g19030.1D2 |
| CRY_1 | BnaC01g21250.1D2 | BnaA01g19040.1D2 |
| CRY_1 | BnaC01g21280.1D2 | BnaA01g19120.1D2 |
| CRY_1 | BnaC01g21550.1D2 | BnaA01g21660.1D2 |
| CRY_1 | BnaC01g21560.1D2 | BnaA01g21670.1D2 |
| CRY_1 | BnaC01g21620.1D2 | BnaA01g22430.1D2 |
| CRY_1 | BnaC01g21800.1D2 | BnaA01g18710.1D2 |
| CRY_1 | BnaC01g21820.1D2 | BnaA01g20720.1D2 |
| CRY_1 | BnaC01g22200.1D2 | BnaA01g21950.1D2 |
| CRY_1 | BnaC01g22360.1D2 | BnaA01g19080.1D2 |
| CRY_1 | BnaC01g23810.1D2 | BnaA01g20290.1D2 |
| CRY_1 | BnaC01g23840.1D2 | BnaA01g21560.1D2 |
| CRY_1 | BnaC01g23850.1D2 | BnaA01g21570.1D2 |

|       |                  |                  |
|-------|------------------|------------------|
| CRY_1 | BnaC01g24130.1D2 | BnaA01g20590.1D2 |
| CRY_1 | BnaC01g24140.1D2 | BnaA01g21950.1D2 |
| CRY_1 | BnaC01g24830.1D2 | BnaA01g24210.1D2 |
| CRY_1 | BnaC01g25110.1D2 | BnaA01g21440.1D2 |
| CRY_1 | BnaC01g25850.1D2 | BnaA01g21280.1D2 |
| CRY_1 | BnaC01g25950.1D2 | BnaA01g20810.1D2 |
| CRY_1 | BnaC01g26050.1D2 | BnaA01g21760.1D2 |
| CRY_1 | BnaC01g26450.1D2 | BnaA01g23080.1D2 |
| CRY_1 | BnaC01g26490.1D2 | BnaA01g23120.1D2 |
| CRY_1 | BnaC01g26840.1D2 | BnaA01g22300.1D2 |
| CRY_1 | BnaC01g26920.1D2 | BnaA01g22840.1D2 |
| CRY_1 | BnaC01g27480.1D2 | BnaA01g23740.1D2 |
| CRY_1 | BnaC01g27710.1D2 | BnaA01g23930.1D2 |
| CRY_1 | BnaC01g28000.1D2 | BnaA01g23650.1D2 |
| CRY_1 | BnaC01g28380.1D2 | BnaA01g24850.1D2 |
| CRY_1 | BnaC01g28470.1D2 | BnaA01g24890.1D2 |
| CRY_1 | BnaC01g29050.1D2 | BnaA01g25240.1D2 |
| CRY_1 | BnaC01g29260.1D2 | BnaA01g21400.1D2 |
| CRY_1 | BnaC01g29320.1D2 | BnaA01g24180.1D2 |
| CRY_1 | BnaC01g29780.1D2 | BnaA01g25800.1D2 |
| CRY_1 | BnaC01g29970.1D2 | BnaA01g29010.1D2 |
| CRY_1 | BnaC01g30690.1D2 | BnaA01g26690.1D2 |
| CRY_1 | BnaC01g30690.1D2 | BnaA01g26690.1D2 |
| CRY_1 | BnaC01g30690.1D2 | BnaA01g26690.1D2 |
| G50   | BnaC01g00070.1D2 | BnaA01g05240.1D2 |
| G50   | BnaC01g00080.1D2 | BnaA01g05250.1D2 |
| G50   | BnaC01g00160.1D2 | BnaA01g05300.1D2 |
| G50   | BnaC01g00260.1D2 | BnaA01g05380.1D2 |
| G50   | BnaC01g00280.1D2 | BnaA01g05410.1D2 |
| G50   | BnaC01g00330.1D2 | BnaA01g05480.1D2 |
| G50   | BnaC01g00340.1D2 | BnaA01g05490.1D2 |
| G50   | BnaC01g00440.1D2 | BnaA01g05570.1D2 |
| G50   | BnaC01g00540.1D2 | BnaA01g05610.1D2 |
| G50   | BnaC01g00560.1D2 | BnaA01g05600.1D2 |
| G50   | BnaC01g00630.1D2 | BnaA01g05670.1D2 |
| G50   | BnaC01g00690.1D2 | BnaA01g00030.1D2 |
| G50   | BnaC01g00710.1D2 | BnaA01g00050.1D2 |
| G50   | BnaC01g00750.1D2 | BnaA01g00080.1D2 |
| G50   | BnaC01g00770.1D2 | BnaA01g00100.1D2 |
| G50   | BnaC01g00800.1D2 | BnaA01g00130.1D2 |
| G50   | BnaC01g00810.1D2 | BnaA01g00140.1D2 |
| G50   | BnaC01g00860.1D2 | BnaA01g00180.1D2 |
| G50   | BnaC01g00870.1D2 | BnaA01g00190.1D2 |
| G50   | BnaC01g00890.1D2 | BnaA01g00210.1D2 |
| G50   | BnaC01g00960.1D2 | BnaA01g00260.1D2 |
| G50   | BnaC01g00980.1D2 | BnaA01g00280.1D2 |
| G50   | BnaC01g00990.1D2 | BnaA01g00290.1D2 |
| G50   | BnaC01g01030.1D2 | BnaA01g00330.1D2 |
| G50   | BnaC01g01070.1D2 | BnaA01g00360.1D2 |
| G50   | BnaC01g01080.1D2 | BnaA01g00370.1D2 |
| G50   | BnaC01g01090.1D2 | BnaA01g00380.1D2 |

|     |                  |                  |
|-----|------------------|------------------|
| G50 | BnaC01g01120.1D2 | BnaA01g00410.1D2 |
| G50 | BnaC01g01190.1D2 | BnaA01g00500.1D2 |
| G50 | BnaC01g01200.1D2 | BnaA01g00510.1D2 |
| G50 | BnaC01g01220.1D2 | BnaA01g00530.1D2 |
| G50 | BnaC01g01240.1D2 | BnaA01g00550.1D2 |
| G50 | BnaC01g01280.1D2 | BnaA01g00600.1D2 |
| G50 | BnaC01g01290.1D2 | BnaA01g00610.1D2 |
| G50 | BnaC01g01320.1D2 | BnaA01g00640.1D2 |
| G50 | BnaC01g01350.1D2 | BnaA01g00670.1D2 |
| G50 | BnaC01g01400.1D2 | BnaA01g00710.1D2 |
| G50 | BnaC01g01410.1D2 | BnaA01g05010.1D2 |
| G50 | BnaC01g01440.1D2 | BnaA01g00740.1D2 |
| G50 | BnaC01g01460.1D2 | BnaA01g00760.1D2 |
| G50 | BnaC01g01480.1D2 | BnaA01g00790.1D2 |
| G50 | BnaC01g01490.1D2 | BnaA01g00800.1D2 |
| G50 | BnaC01g01510.1D2 | BnaA01g00820.1D2 |
| G50 | BnaC01g01530.1D2 | BnaA01g00830.1D2 |
| G50 | BnaC01g01540.1D2 | BnaA01g00840.1D2 |
| G50 | BnaC01g01550.1D2 | BnaA01g00850.1D2 |
| G50 | BnaC01g01560.1D2 | BnaA01g04930.1D2 |
| G50 | BnaC01g01600.1D2 | BnaA01g00890.1D2 |
| G50 | BnaC01g01610.1D2 | BnaA01g00900.1D2 |
| G50 | BnaC01g01650.1D2 | BnaA01g00950.1D2 |
| G50 | BnaC01g01660.1D2 | BnaA01g00960.1D2 |
| G50 | BnaC01g01680.1D2 | BnaA01g00980.1D2 |
| G50 | BnaC01g01700.1D2 | BnaA01g01000.1D2 |
| G50 | BnaC01g01920.1D2 | BnaA01g01230.1D2 |
| G50 | BnaC01g01990.1D2 | BnaA01g01300.1D2 |
| G50 | BnaC01g02000.1D2 | BnaA01g01310.1D2 |
| G50 | BnaC01g02210.1D2 | BnaA01g01500.1D2 |
| G50 | BnaC01g02230.1D2 | BnaA01g01520.1D2 |
| G50 | BnaC01g02300.1D2 | BnaA01g01590.1D2 |
| G50 | BnaC01g02310.1D2 | BnaA01g01600.1D2 |
| G50 | BnaC01g02390.1D2 | BnaA01g01670.1D2 |
| G50 | BnaC01g02410.1D2 | BnaA01g01700.1D2 |
| G50 | BnaC01g02470.1D2 | BnaA01g01760.1D2 |
| G50 | BnaC01g02480.1D2 | BnaA01g01770.1D2 |
| G50 | BnaC01g02490.1D2 | BnaA01g01780.1D2 |
| G50 | BnaC01g02520.1D2 | BnaA01g01810.1D2 |
| G50 | BnaC01g02610.1D2 | BnaA01g01920.1D2 |
| G50 | BnaC01g02660.1D2 | BnaA01g01970.1D2 |
| G50 | BnaC01g02670.1D2 | BnaA01g01980.1D2 |
| G50 | BnaC01g02820.1D2 | BnaA01g05170.1D2 |
| G50 | BnaC01g02870.1D2 | BnaA01g05200.1D2 |
| G50 | BnaC01g02970.1D2 | BnaA01g02180.1D2 |
| G50 | BnaC01g03080.1D2 | BnaA01g02290.1D2 |
| G50 | BnaC01g03090.1D2 | BnaA01g02300.1D2 |
| G50 | BnaC01g03150.1D2 | BnaA01g02360.1D2 |
| G50 | BnaC01g03170.1D2 | BnaA01g02380.1D2 |
| G50 | BnaC01g03300.1D2 | BnaA01g02500.1D2 |
| G50 | BnaC01g03480.1D2 | BnaA01g02630.1D2 |

|      |                  |                  |
|------|------------------|------------------|
| G50  | BnaC01g03500.1D2 | BnaA01g02640.1D2 |
| G50  | BnaC01g03640.1D2 | BnaA01g02770.1D2 |
| G50  | BnaC01g03710.1D2 | BnaA01g02850.1D2 |
| G50  | BnaC01g03720.1D2 | BnaA01g02860.1D2 |
| G50  | BnaC01g04050.1D2 | BnaA01g03130.1D2 |
| G50  | BnaC01g04190.1D2 | BnaA01g03250.1D2 |
| G50  | BnaC01g04210.1D2 | BnaA01g03270.1D2 |
| G50  | BnaC01g04230.1D2 | BnaA01g03290.1D2 |
| G50  | BnaC01g04320.1D2 | BnaA01g03380.1D2 |
| G50  | BnaC01g04340.1D2 | BnaA01g03390.1D2 |
| G50  | BnaC01g04370.1D2 | BnaA01g03410.1D2 |
| G50  | BnaC01g04400.1D2 | BnaA01g03440.1D2 |
| G50  | BnaC01g04460.1D2 | BnaA01g03500.1D2 |
| G50  | BnaC01g04720.1D2 | BnaA01g03430.1D2 |
| G50  | BnaC01g04830.1D2 | BnaA01g03810.1D2 |
| G50  | BnaC01g04930.1D2 | BnaA01g03890.1D2 |
| G50  | BnaC01g05100.1D2 | BnaA01g04100.1D2 |
| G50  | BnaC01g05190.1D2 | BnaA01g04160.1D2 |
| G50  | BnaC01g05210.1D2 | BnaA01g04180.1D2 |
| G50  | BnaC01g05310.1D2 | BnaA01g04280.1D2 |
| G50  | BnaC01g05320.1D2 | BnaA01g04280.1D2 |
| G50  | BnaC01g07640.1D2 | BnaA01g04060.1D2 |
| G50  | BnaC01g07660.1D2 | BnaA01g00950.1D2 |
| G50  | BnaC01g07670.1D2 | BnaA01g04070.1D2 |
| G50  | BnaC01g07710.1D2 | BnaA01g05070.1D2 |
| G50  | BnaC01g19590.1D2 | BnaA01g17940.1D2 |
| S_39 | BnaC01g06750.1D2 | BnaA01g31260.1D2 |
| S_39 | BnaC01g27090.1D2 | BnaA01g24330.1D2 |
| S_39 | BnaC01g30060.1D2 | BnaA01g26080.1D2 |
| S_39 | BnaC01g30110.1D2 | BnaA01g26110.1D2 |
| S_39 | BnaC01g30470.1D2 | BnaA01g26520.1D2 |
| S_39 | BnaC01g30480.1D2 | BnaA01g26540.1D2 |
| S_39 | BnaC01g30490.1D2 | BnaA01g26550.1D2 |
| S_39 | BnaC01g30530.1D2 | BnaA01g26590.1D2 |
| S_39 | BnaC01g30540.1D2 | BnaA01g26600.1D2 |
| S_39 | BnaC01g30550.1D2 | BnaA01g26610.1D2 |
| S_39 | BnaC01g30570.1D2 | BnaA01g26630.1D2 |
| S_39 | BnaC01g30580.1D2 | BnaA01g26640.1D2 |
| S_39 | BnaC01g30660.1D2 | BnaA01g26710.1D2 |
| S_39 | BnaC01g30670.1D2 | BnaA01g26700.1D2 |
| S_39 | BnaC01g30690.1D2 | BnaA01g26690.1D2 |
| S_39 | BnaC01g30690.1D2 | BnaA01g26690.1D2 |
| S_39 | BnaC01g30690.1D2 | BnaA01g26690.1D2 |
| S_39 | BnaC01g30780.1D2 | BnaA01g26790.1D2 |
| S_39 | BnaC01g30810.1D2 | BnaA01g26900.1D2 |
| S_39 | BnaC01g30840.1D2 | BnaA01g26930.1D2 |
| S_39 | BnaC01g30850.1D2 | BnaA01g26940.1D2 |
| S_39 | BnaC01g30860.1D2 | BnaA01g26950.1D2 |
| S_39 | BnaC01g30930.1D2 | BnaA01g26170.1D2 |
| S_39 | BnaC01g31220.1D2 | BnaA01g27510.1D2 |
| S_39 | BnaC01g31290.1D2 | BnaA01g27100.1D2 |

|      |                  |                  |
|------|------------------|------------------|
| S_39 | BnaC01g31300.1D2 | BnaA01g27110.1D2 |
| S_39 | BnaC01g31310.1D2 | BnaA01g27120.1D2 |
| S_39 | BnaC01g31330.1D2 | BnaA01g27140.1D2 |
| S_39 | BnaC01g31340.1D2 | BnaA01g27180.1D2 |
| S_39 | BnaC01g31350.1D2 | BnaA01g27190.1D2 |
| S_39 | BnaC01g31430.1D2 | BnaA01g27570.1D2 |
| S_39 | BnaC01g31530.1D2 | BnaA01g27280.1D2 |
| S_39 | BnaC01g31780.1D2 | BnaA01g27760.1D2 |
| S_39 | BnaC01g31920.1D2 | BnaA01g27900.1D2 |
| S_39 | BnaC01g31970.1D2 | BnaA01g27930.1D2 |
| S_39 | BnaC01g32110.1D2 | BnaA01g27260.1D2 |
| S_39 | BnaC01g32120.1D2 | BnaA01g27250.1D2 |
| S_39 | BnaC01g32140.1D2 | BnaA01g27230.1D2 |
| S_39 | BnaC01g32160.1D2 | BnaA01g27210.1D2 |
| S_39 | BnaC01g32280.1D2 | BnaA01g28060.1D2 |
| S_39 | BnaC01g32320.1D2 | BnaA01g28110.1D2 |
| S_39 | BnaC01g32330.1D2 | BnaA01g28120.1D2 |
| S_39 | BnaC01g32340.1D2 | BnaA01g27980.1D2 |
| S_39 | BnaC01g32410.1D2 | BnaA01g28200.1D2 |
| S_39 | BnaC01g32420.1D2 | BnaA01g28210.1D2 |
| S_39 | BnaC01g32450.1D2 | BnaA01g28230.1D2 |
| S_39 | BnaC01g32480.1D2 | BnaA01g28260.1D2 |
| S_39 | BnaC01g32500.1D2 | BnaA01g28280.1D2 |
| S_39 | BnaC01g32530.1D2 | BnaA01g28900.1D2 |
| S_39 | BnaC01g32580.1D2 | BnaA01g28310.1D2 |
| S_39 | BnaC01g32640.1D2 | BnaA01g28570.1D2 |
| S_39 | BnaC01g32710.1D2 | BnaA01g28490.1D2 |
| S_39 | BnaC01g32730.1D2 | BnaA01g28470.1D2 |
| S_39 | BnaC01g32740.1D2 | BnaA01g28460.1D2 |
| S_39 | BnaC01g32760.1D2 | BnaA01g28440.1D2 |
| S_39 | BnaC01g32870.1D2 | BnaA01g27980.1D2 |
| S_39 | BnaC01g32880.1D2 | BnaA01g27990.1D2 |
| S_39 | BnaC01g32890.1D2 | BnaA01g28000.1D2 |
| S_39 | BnaC01g32900.1D2 | BnaA01g27090.1D2 |
| S_39 | BnaC01g32960.1D2 | BnaA01g26450.1D2 |
| S_39 | BnaC01g32980.1D2 | BnaA01g28370.1D2 |
| S_39 | BnaC01g33010.1D2 | BnaA01g28990.1D2 |
| S_39 | BnaC01g33080.1D2 | BnaA01g27730.1D2 |
| S_39 | BnaC01g33240.1D2 | BnaA01g28640.1D2 |
| S_39 | BnaC01g33270.1D2 | BnaA01g28660.1D2 |
| S_39 | BnaC01g33310.1D2 | BnaA01g28700.1D2 |
| S_39 | BnaC01g33340.1D2 | BnaA01g28720.1D2 |
| S_39 | BnaC01g33370.1D2 | BnaA01g28740.1D2 |
| S_39 | BnaC01g33380.1D2 | BnaA01g28750.1D2 |
| S_39 | BnaC01g33420.1D2 | BnaA01g28780.1D2 |
| S_39 | BnaC01g33430.1D2 | BnaA01g28790.1D2 |
| S_39 | BnaC01g33630.1D2 | BnaA01g30690.1D2 |
| S_39 | BnaC01g33690.1D2 | BnaA01g30760.1D2 |
| S_39 | BnaC01g33720.1D2 | BnaA01g30780.1D2 |
| S_39 | BnaC01g33720.1D2 | BnaA01g31090.1D2 |
| S_39 | BnaC01g33730.1D2 | BnaA01g30780.1D2 |



|       |                  |                  |
|-------|------------------|------------------|
| S_39  | BnaC01g33730.1D2 | BnaA01g31080.1D2 |
| S_39  | BnaC01g33780.1D2 | BnaA01g31050.1D2 |
| S_39  | BnaC01g33940.1D2 | BnaA01g30970.1D2 |
| S_39  | BnaC01g33950.1D2 | BnaA01g30980.1D2 |
| S_39  | BnaC01g33970.1D2 | BnaA01g30990.1D2 |
| S_39  | BnaC01g34060.1D2 | BnaA01g32640.1D2 |
| S_39  | BnaC01g34090.1D2 | BnaA01g32680.1D2 |
| S_39  | BnaC01g34160.1D2 | BnaA01g31000.1D2 |
| S_39  | BnaC01g34230.1D2 | BnaA01g31760.1D2 |
| S_39  | BnaC01g34440.1D2 | BnaA01g32580.1D2 |
| S_39  | BnaC01g34550.1D2 | BnaA01g31130.1D2 |
| S_39  | BnaC01g34620.1D2 | BnaA01g31170.1D2 |
| S_39  | BnaC01g34690.1D2 | BnaA01g31230.1D2 |
| S_39  | BnaC01g34700.1D2 | BnaA01g31240.1D2 |
| S_39  | BnaC01g34720.1D2 | BnaA01g31260.1D2 |
| S_39  | BnaC01g34750.1D2 | BnaA01g31280.1D2 |
| S_39  | BnaC01g34770.1D2 | BnaA01g31300.1D2 |
| S_39  | BnaC01g34850.1D2 | BnaA01g31340.1D2 |
| S_39  | BnaC01g34860.1D2 | BnaA01g31340.1D2 |
| S_39  | BnaC01g34880.1D2 | BnaA01g31360.1D2 |
| S_39  | BnaC01g34910.1D2 | BnaA01g31400.1D2 |
| S_39  | BnaC01g34920.1D2 | BnaA01g31400.1D2 |
| S_39  | BnaC01g34960.1D2 | BnaA01g31430.1D2 |
| S_39  | BnaC01g35030.1D2 | BnaA01g31490.1D2 |
| S_39  | BnaC01g35060.1D2 | BnaA01g31550.1D2 |
| S_39  | BnaC01g35070.1D2 | BnaA01g31550.1D2 |
| S_39  | BnaC01g35110.1D2 | BnaA01g31590.1D2 |
| S_39  | BnaC01g36100.1D2 | BnaA01g34040.1D2 |
| S_39  | BnaC01g36750.1D2 | BnaA01g35170.1D2 |
| S_39  | BnaC01g36780.1D2 | BnaA01g35210.1D2 |
| S_39  | BnaC01g36790.1D2 | BnaA01g35220.1D2 |
| S_39  | BnaC01g36800.1D2 | BnaA01g35230.1D2 |
| S_39  | BnaC01g36810.1D2 | BnaA01g35240.1D2 |
| S_39  | BnaC01g36840.1D2 | BnaA01g35260.1D2 |
| S_39  | BnaC01g36860.1D2 | BnaA01g35270.1D2 |
| S_39  | BnaC01g36870.1D2 | BnaA01g35280.1D2 |
| S_39  | BnaC01g36980.1D2 | BnaA01g35370.1D2 |
| S_39  | BnaC01g37030.1D2 | BnaA01g35420.1D2 |
| S_39  | BnaC01g37120.1D2 | BnaA01g35520.1D2 |
| S_39  | BnaC01g37330.1D2 | BnaA01g35720.1D2 |
| S_39  | BnaC01g37390.1D2 | BnaA01g35770.1D2 |
| Major | BnaC01g18150.1D2 | BnaA01g16830.1D2 |
| Major | BnaC01g19260.1D2 | BnaA01g17480.1D2 |
| Major | BnaC01g19280.1D2 | BnaA01g17500.1D2 |
| Major | BnaC01g19550.1D2 | BnaA01g17760.1D2 |
| Major | BnaC01g19980.1D2 | BnaA01g17280.1D2 |
| Major | BnaC01g20220.1D2 | BnaA01g17860.1D2 |
| Major | BnaC01g20240.1D2 | BnaA01g17880.1D2 |
| Major | BnaC01g20250.1D2 | BnaA01g17880.1D2 |
| Major | BnaC01g20260.1D2 | BnaA01g17890.1D2 |
| Major | BnaC01g32420.1D2 | BnaA01g28210.1D2 |

|       |                  |                  |
|-------|------------------|------------------|
| Major | BnaC01g32530.1D2 | BnaA01g28900.1D2 |
| Major | BnaC01g32640.1D2 | BnaA01g28570.1D2 |
| Major | BnaC01g32760.1D2 | BnaA01g28440.1D2 |
| Major | BnaC01g32880.1D2 | BnaA01g27990.1D2 |
| Major | BnaC01g32890.1D2 | BnaA01g28000.1D2 |
| Major | BnaC01g32980.1D2 | BnaA01g28370.1D2 |
| Major | BnaC01g33240.1D2 | BnaA01g28640.1D2 |
| Major | BnaC01g33310.1D2 | BnaA01g28700.1D2 |
| Major | BnaC01g33380.1D2 | BnaA01g28750.1D2 |
| Major | BnaC01g33420.1D2 | BnaA01g28780.1D2 |
| Major | BnaC01g33660.1D2 | BnaA01g30720.1D2 |
| Major | BnaC01g33720.1D2 | BnaA01g31090.1D2 |
| Major | BnaC01g33850.1D2 | BnaA01g30880.1D2 |
| Major | BnaC01g33940.1D2 | BnaA01g30970.1D2 |
| Major | BnaC01g33950.1D2 | BnaA01g30980.1D2 |
| Major | BnaC01g34120.1D2 | BnaA01g32700.1D2 |
| Major | BnaC01g34240.1D2 | BnaA01g31740.1D2 |
| Major | BnaC01g34270.1D2 | BnaA01g31710.1D2 |
| Major | BnaC01g34300.1D2 | BnaA01g31650.1D2 |
| Major | BnaC01g34350.1D2 | BnaA01g31670.1D2 |
| Major | BnaC01g34480.1D2 | BnaA01g29180.1D2 |
| Major | BnaC01g34880.1D2 | BnaA01g31360.1D2 |
| Major | BnaC01g34960.1D2 | BnaA01g31430.1D2 |
| Major | BnaC01g34970.1D2 | BnaA01g31440.1D2 |
| Major | BnaC01g35060.1D2 | BnaA01g31550.1D2 |
| Major | BnaC01g35390.1D2 | BnaA01g32250.1D2 |
| Major | BnaC01g35490.1D2 | BnaA01g33630.1D2 |
| Major | BnaC01g35500.1D2 | BnaA01g33640.1D2 |
| Major | BnaC01g35510.1D2 | BnaA01g33650.1D2 |
| Major | BnaC01g35520.1D2 | BnaA01g33670.1D2 |
| Major | BnaC01g35540.1D2 | BnaA01g33690.1D2 |
| Major | BnaC01g35550.1D2 | BnaA01g33710.1D2 |
| Major | BnaC01g35710.1D2 | BnaA01g33840.1D2 |
| Major | BnaC01g36840.1D2 | BnaA01g35260.1D2 |
| Major | BnaC01g36980.1D2 | BnaA01g35370.1D2 |
| Major | BnaC01g37030.1D2 | BnaA01g35420.1D2 |
| Major | BnaC01g37120.1D2 | BnaA01g35520.1D2 |
| Major | BnaC01g37390.1D2 | BnaA01g35770.1D2 |
| H165  | BnaC01g06750.1D2 | BnaA01g31260.1D2 |
| H165  | BnaC01g18500.1D2 | BnaA01g16660.1D2 |
| H165  | BnaC01g18520.1D2 | BnaA01g16670.1D2 |
| H165  | BnaC01g18610.1D2 | BnaA01g15930.1D2 |
| H165  | BnaC01g18880.1D2 | BnaA01g16210.1D2 |
| H165  | BnaC01g18890.1D2 | BnaA01g16220.1D2 |
| H165  | BnaC01g18930.1D2 | BnaA01g16270.1D2 |
| H165  | BnaC01g19230.1D2 | BnaA01g17450.1D2 |
| H165  | BnaC01g19300.1D2 | BnaA01g17520.1D2 |
| H165  | BnaC01g19550.1D2 | BnaA01g17760.1D2 |
| H165  | BnaC01g19570.1D2 | BnaA01g16550.1D2 |
| H165  | BnaC01g22770.1D2 | BnaA01g19500.1D2 |
| H165  | BnaC01g27090.1D2 | BnaA01g24330.1D2 |

|      |                  |                  |
|------|------------------|------------------|
| H165 | BnaC01g29970.1D2 | BnaA01g29010.1D2 |
| H165 | BnaC01g30010.1D2 | BnaA01g26040.1D2 |
| H165 | BnaC01g30100.1D2 | BnaA01g26100.1D2 |
| H165 | BnaC01g30460.1D2 | BnaA01g26510.1D2 |
| H165 | BnaC01g30480.1D2 | BnaA01g26540.1D2 |
| H165 | BnaC01g30490.1D2 | BnaA01g26550.1D2 |
| H165 | BnaC01g30550.1D2 | BnaA01g26610.1D2 |
| H165 | BnaC01g30570.1D2 | BnaA01g26630.1D2 |
| H165 | BnaC01g30670.1D2 | BnaA01g26700.1D2 |
| H165 | BnaC01g30690.1D2 | BnaA01g26690.1D2 |
| H165 | BnaC01g30690.1D2 | BnaA01g26690.1D2 |
| H165 | BnaC01g30690.1D2 | BnaA01g26690.1D2 |
| H165 | BnaC01g30860.1D2 | BnaA01g26950.1D2 |
| H165 | BnaC01g31300.1D2 | BnaA01g27110.1D2 |
| H165 | BnaC01g31310.1D2 | BnaA01g27120.1D2 |
| H165 | BnaC01g31430.1D2 | BnaA01g27570.1D2 |
| H165 | BnaC01g31480.1D2 | BnaA01g27610.1D2 |
| H165 | BnaC01g31590.1D2 | BnaA01g27330.1D2 |
| H165 | BnaC01g31780.1D2 | BnaA01g27760.1D2 |
| H165 | BnaC01g31800.1D2 | BnaA01g27770.1D2 |
| H165 | BnaC01g32110.1D2 | BnaA01g27260.1D2 |
| H165 | BnaC01g32490.1D2 | BnaA01g28270.1D2 |
| H165 | BnaC01g32500.1D2 | BnaA01g28280.1D2 |
| H165 | BnaC01g32530.1D2 | BnaA01g28900.1D2 |
| H165 | BnaC01g32640.1D2 | BnaA01g28570.1D2 |
| H165 | BnaC01g32980.1D2 | BnaA01g28370.1D2 |
| H165 | BnaC01g33380.1D2 | BnaA01g28750.1D2 |
| H165 | BnaC01g33420.1D2 | BnaA01g28780.1D2 |
| H165 | BnaC01g33590.1D2 | BnaA01g27500.1D2 |
| H165 | BnaC01g33630.1D2 | BnaA01g30690.1D2 |
| H165 | BnaC01g33680.1D2 | BnaA01g30750.1D2 |
| H165 | BnaC01g33730.1D2 | BnaA01g30780.1D2 |
| H165 | BnaC01g33730.1D2 | BnaA01g31080.1D2 |
| H165 | BnaC01g33780.1D2 | BnaA01g31050.1D2 |
| H165 | BnaC01g34120.1D2 | BnaA01g32700.1D2 |
| H165 | BnaC01g34130.1D2 | BnaA01g32710.1D2 |
| H165 | BnaC01g34160.1D2 | BnaA01g31000.1D2 |
| H165 | BnaC01g34620.1D2 | BnaA01g31170.1D2 |
| H165 | BnaC01g34720.1D2 | BnaA01g31260.1D2 |
| H165 | BnaC01g34770.1D2 | BnaA01g31300.1D2 |
| H165 | BnaC01g34850.1D2 | BnaA01g31340.1D2 |
| H165 | BnaC01g34960.1D2 | BnaA01g31430.1D2 |
| H165 | BnaC01g35060.1D2 | BnaA01g31550.1D2 |
| H165 | BnaC01g35070.1D2 | BnaA01g31550.1D2 |
| H165 | BnaC01g35110.1D2 | BnaA01g31590.1D2 |
| H165 | BnaC01g35540.1D2 | BnaA01g33690.1D2 |
| H165 | BnaC01g35710.1D2 | BnaA01g33840.1D2 |
| H165 | BnaC01g36170.1D2 | BnaA01g32930.1D2 |
| H165 | BnaC01g36710.1D2 | BnaA01g35130.1D2 |
| H165 | BnaC01g36790.1D2 | BnaA01g35220.1D2 |
| H165 | BnaC01g36800.1D2 | BnaA01g35230.1D2 |

|      |                  |                  |
|------|------------------|------------------|
| H165 | BnaC01g36840.1D2 | BnaA01g35260.1D2 |
| H165 | BnaC01g37020.1D2 | BnaA01g35410.1D2 |
| H165 | BnaC01g37390.1D2 | BnaA01g35770.1D2 |

**List of HE genes (C02 to A02)**

| <b>Accession</b> | <b>Lost gene</b> | <b>Duplicated HE gene</b> |
|------------------|------------------|---------------------------|
| G50              | BnaC02g00230.1D2 | BnaA02g00560.1D2          |
| G50              | BnaC02g00280.1D2 | BnaA02g00510.1D2          |
| G50              | BnaC02g00300.1D2 | BnaA02g00490.1D2          |
| G50              | BnaC02g00310.1D2 | BnaA02g00480.1D2          |
| G50              | BnaC02g00480.1D2 | BnaA02g00310.1D2          |
| G50              | BnaC02g00530.1D2 | BnaA02g00260.1D2          |
| G50              | BnaC02g00550.1D2 | BnaA02g00240.1D2          |
| G50              | BnaC02g00680.1D2 | BnaA02g00040.1D2          |
| G50              | BnaC02g00730.1D2 | BnaA02g00020.1D2          |
| G50              | BnaC02g11060.1D2 | BnaA02g07950.1D2          |
| G50              | BnaC02g11130.1D2 | BnaA02g08030.1D2          |
| G50              | BnaC02g11550.1D2 | BnaA02g08360.1D2          |
| G50              | BnaC02g11570.1D2 | BnaA02g08370.1D2          |
| G50              | BnaC02g11660.1D2 | BnaA02g08430.1D2          |
| G50              | BnaC02g11730.1D2 | BnaA02g08530.1D2          |
| G50              | BnaC02g11840.1D2 | BnaA02g08670.1D2          |
| G50              | BnaC02g11930.1D2 | BnaA02g08770.1D2          |
| G50              | BnaC02g11960.1D2 | BnaA02g08780.1D2          |
| G50              | BnaC02g11970.1D2 | BnaA02g08790.1D2          |
| G50              | BnaC02g12080.1D2 | BnaA02g08900.1D2          |
| G50              | BnaC02g12120.1D2 | BnaA02g08940.1D2          |
| G50              | BnaC02g12210.1D2 | BnaA02g09000.1D2          |
| G50              | BnaC02g12230.1D2 | BnaA02g08980.1D2          |
| G50              | BnaC02g12250.1D2 | BnaA02g09110.1D2          |
| G50              | BnaC02g12290.1D2 | BnaA02g09120.1D2          |
| G50              | BnaC02g12400.1D2 | BnaA02g08470.1D2          |
| G50              | BnaC02g12440.1D2 | BnaA02g09300.1D2          |
| G50              | BnaC02g12530.1D2 | BnaA02g09380.1D2          |
| G50              | BnaC02g12590.1D2 | BnaA02g09420.1D2          |
| G50              | BnaC02g12750.1D2 | BnaA02g09520.1D2          |
| G50              | BnaC02g12930.1D2 | BnaA02g09750.1D2          |
| G50              | BnaC02g12980.1D2 | BnaA02g09780.1D2          |
| G50              | BnaC02g13100.1D2 | BnaA02g11230.1D2          |
| G50              | BnaC02g13560.1D2 | BnaA02g10090.1D2          |
| G50              | BnaC02g13570.1D2 | BnaA02g10100.1D2          |
| G50              | BnaC02g13590.1D2 | BnaA02g10120.1D2          |
| G50              | BnaC02g13610.1D2 | BnaA02g10140.1D2          |
| G50              | BnaC02g13630.1D2 | BnaA02g10160.1D2          |
| G50              | BnaC02g13650.1D2 | BnaA02g10180.1D2          |
| G50              | BnaC02g13720.1D2 | BnaA02g10260.1D2          |
| G50              | BnaC02g13740.1D2 | BnaA02g10280.1D2          |
| G50              | BnaC02g13790.1D2 | BnaA02g10410.1D2          |
| G50              | BnaC02g13910.1D2 | BnaA02g10590.1D2          |
| G50              | BnaC02g14050.1D2 | BnaA02g13340.1D2          |
| G50              | BnaC02g14200.1D2 | BnaA02g11310.1D2          |

|     |                  |                  |
|-----|------------------|------------------|
| G50 | BnaC02g14290.1D2 | BnaA02g10890.1D2 |
| G50 | BnaC02g14620.1D2 | BnaA02g11380.1D2 |
| G50 | BnaC02g14640.1D2 | BnaA02g11400.1D2 |
| G50 | BnaC02g14700.1D2 | BnaA02g11440.1D2 |
| G50 | BnaC02g14810.1D2 | BnaA02g11500.1D2 |
| G50 | BnaC02g14840.1D2 | BnaA02g11530.1D2 |
| G50 | BnaC02g14860.1D2 | BnaA02g11540.1D2 |
| G50 | BnaC02g14870.1D2 | BnaA02g11560.1D2 |
| G50 | BnaC02g15040.1D2 | BnaA02g11300.1D2 |
| G50 | BnaC02g15250.1D2 | BnaA02g11660.1D2 |
| G50 | BnaC02g15280.1D2 | BnaA02g11680.1D2 |
| G50 | BnaC02g15300.1D2 | BnaA02g13650.1D2 |
| G50 | BnaC02g15580.1D2 | BnaA02g11720.1D2 |
| G50 | BnaC02g15760.1D2 | BnaA02g11910.1D2 |
| G50 | BnaC02g15770.1D2 | BnaA02g11920.1D2 |
| G50 | BnaC02g15860.1D2 | BnaA02g12030.1D2 |
| G50 | BnaC02g15880.1D2 | BnaA02g12040.1D2 |
| G50 | BnaC02g15930.1D2 | BnaA02g12480.1D2 |
| G50 | BnaC02g15940.1D2 | BnaA02g12490.1D2 |
| G50 | BnaC02g15990.1D2 | BnaA02g12160.1D2 |
| G50 | BnaC02g16130.1D2 | BnaA02g12620.1D2 |
| G50 | BnaC02g16190.1D2 | BnaA02g12690.1D2 |
| G50 | BnaC02g16200.1D2 | BnaA02g12690.1D2 |
| G50 | BnaC02g16220.1D2 | BnaA02g12710.1D2 |
| G50 | BnaC02g16250.1D2 | BnaA02g12760.1D2 |
| G50 | BnaC02g16260.1D2 | BnaA02g12770.1D2 |
| G50 | BnaC02g16280.1D2 | BnaA02g12800.1D2 |
| G50 | BnaC02g16330.1D2 | BnaA02g12920.1D2 |
| G50 | BnaC02g16350.1D2 | BnaA02g12940.1D2 |
| G50 | BnaC02g16390.1D2 | BnaA02g12980.1D2 |
| G50 | BnaC02g16400.1D2 | BnaA02g12990.1D2 |
| G50 | BnaC02g16440.1D2 | BnaA02g13040.1D2 |
| G50 | BnaC02g16500.1D2 | BnaA02g13070.1D2 |
| G50 | BnaC02g16520.1D2 | BnaA02g13100.1D2 |
| G50 | BnaC02g16560.1D2 | BnaA02g13150.1D2 |
| G50 | BnaC02g16580.1D2 | BnaA02g13160.1D2 |
| G50 | BnaC02g16590.1D2 | BnaA02g13170.1D2 |
| G50 | BnaC02g16600.1D2 | BnaA02g13180.1D2 |
| G50 | BnaC02g16610.1D2 | BnaA02g13190.1D2 |
| G50 | BnaC02g16670.1D2 | BnaA02g13250.1D2 |
| G50 | BnaC02g17180.1D2 | BnaA02g11860.1D2 |
| G50 | BnaC02g17550.1D2 | BnaA02g13710.1D2 |
| G50 | BnaC02g17570.1D2 | BnaA02g13680.1D2 |
| G50 | BnaC02g17810.1D2 | BnaA02g13460.1D2 |
| G50 | BnaC02g17820.1D2 | BnaA02g13450.1D2 |
| G50 | BnaC02g17830.1D2 | BnaA02g13440.1D2 |
| G50 | BnaC02g17930.1D2 | BnaA02g13620.1D2 |
| G50 | BnaC02g17980.1D2 | BnaA02g13410.1D2 |
| G50 | BnaC02g17990.1D2 | BnaA02g13400.1D2 |
| G50 | BnaC02g18170.1D2 | BnaA02g13280.1D2 |
| G50 | BnaC02g18200.1D2 | BnaA02g13310.1D2 |

|      |                  |                  |
|------|------------------|------------------|
| G50  | BnaC02g31440.1D2 | BnaA02g24810.1D2 |
| G50  | BnaC02g31550.1D2 | BnaA02g25510.1D2 |
| G50  | BnaC02g31690.1D2 | BnaA02g24900.1D2 |
| G50  | BnaC02g31710.1D2 | BnaA02g24910.1D2 |
| G50  | BnaC02g31740.1D2 | BnaA02g25070.1D2 |
| G50  | BnaC02g31820.1D2 | BnaA02g25000.1D2 |
| G50  | BnaC02g31910.1D2 | BnaA02g25140.1D2 |
| G50  | BnaC02g32070.1D2 | BnaA02g25580.1D2 |
| G50  | BnaC02g32110.1D2 | BnaA02g25620.1D2 |
| G50  | BnaC02g32140.1D2 | BnaA02g25650.1D2 |
| G50  | BnaC02g32310.1D2 | BnaA02g26970.1D2 |
| G50  | BnaC02g32320.1D2 | BnaA02g26970.1D2 |
| G50  | BnaC02g32380.1D2 | BnaA02g26920.1D2 |
| G50  | BnaC02g32390.1D2 | BnaA02g27170.1D2 |
| G50  | BnaC02g32490.1D2 | BnaA02g26840.1D2 |
| G50  | BnaC02g32680.1D2 | BnaA02g25820.1D2 |
| G50  | BnaC02g32880.1D2 | BnaA02g26700.1D2 |
| H176 | BnaC02g12980.1D2 | BnaA02g09780.1D2 |
| H176 | BnaC02g14050.1D2 | BnaA02g13340.1D2 |
| H176 | BnaC02g16280.1D2 | BnaA02g12800.1D2 |
| H176 | BnaC02g16310.1D2 | BnaA02g12850.1D2 |
| H176 | BnaC02g16330.1D2 | BnaA02g12920.1D2 |
| H176 | BnaC02g16350.1D2 | BnaA02g12940.1D2 |
| H176 | BnaC02g16380.1D2 | BnaA02g12970.1D2 |
| H176 | BnaC02g16390.1D2 | BnaA02g12980.1D2 |
| H176 | BnaC02g16400.1D2 | BnaA02g12990.1D2 |
| H176 | BnaC02g21060.1D2 | BnaA02g16930.1D2 |
| H176 | BnaC02g26400.1D2 | BnaA02g19060.1D2 |
| H176 | BnaC02g35650.1D2 | BnaA02g29110.1D2 |
| H176 | BnaC02g35660.1D2 | BnaA02g29120.1D2 |
| H176 | BnaC02g35810.1D2 | BnaA02g29220.1D2 |
| H176 | BnaC02g35840.1D2 | BnaA02g29230.1D2 |
| H176 | BnaC02g35850.1D2 | BnaA02g29240.1D2 |
| H176 | BnaC02g35870.1D2 | BnaA02g29270.1D2 |
| H176 | BnaC02g35910.1D2 | BnaA02g29300.1D2 |
| H176 | BnaC02g35920.1D2 | BnaA02g29310.1D2 |
| H176 | BnaC02g35930.1D2 | BnaA02g29320.1D2 |
| H176 | BnaC02g35950.1D2 | BnaA02g29340.1D2 |
| H176 | BnaC02g35960.1D2 | BnaA02g29350.1D2 |
| H176 | BnaC02g36300.1D2 | BnaA02g29520.1D2 |
| H176 | BnaC02g36340.1D2 | BnaA02g29540.1D2 |
| H176 | BnaC02g36380.1D2 | BnaA02g29580.1D2 |
| H176 | BnaC02g36390.1D2 | BnaA02g29590.1D2 |
| H176 | BnaC02g36440.1D2 | BnaA02g29640.1D2 |
| H176 | BnaC02g36460.1D2 | BnaA02g29660.1D2 |
| H176 | BnaC02g36470.1D2 | BnaA02g29670.1D2 |
| H176 | BnaC02g36500.1D2 | BnaA02g29880.1D2 |
| H176 | BnaC02g36510.1D2 | BnaA02g29690.1D2 |
| H176 | BnaC02g36530.1D2 | BnaA02g29710.1D2 |
| H176 | BnaC02g36560.1D2 | BnaA02g29720.1D2 |
| H176 | BnaC02g36570.1D2 | BnaA02g29730.1D2 |

|      |                  |                  |
|------|------------------|------------------|
| H176 | BnaC02g36580.1D2 | BnaA02g29740.1D2 |
| H176 | BnaC02g36600.1D2 | BnaA02g29750.1D2 |
| H176 | BnaC02g36610.1D2 | BnaA02g29760.1D2 |
| H176 | BnaC02g36620.1D2 | BnaA02g29770.1D2 |
| H176 | BnaC02g36710.1D2 | BnaA02g29840.1D2 |
| H176 | BnaC02g36760.1D2 | BnaA02g29910.1D2 |
| H176 | BnaC02g36770.1D2 | BnaA02g29920.1D2 |
| H176 | BnaC02g36810.1D2 | BnaA02g29940.1D2 |
| H176 | BnaC02g36870.1D2 | BnaA02g30080.1D2 |
| H176 | BnaC02g36880.1D2 | BnaA02g30090.1D2 |
| H176 | BnaC02g36960.1D2 | BnaA02g30120.1D2 |
| H176 | BnaC02g36990.1D2 | BnaA02g30150.1D2 |
| H176 | BnaC02g37000.1D2 | BnaA02g30230.1D2 |
| H176 | BnaC02g37010.1D2 | BnaA02g30230.1D2 |
| H176 | BnaC02g37060.1D2 | BnaA02g30290.1D2 |
| H176 | BnaC02g37090.1D2 | BnaA02g30370.1D2 |
| H176 | BnaC02g37160.1D2 | BnaA02g30350.1D2 |
| H176 | BnaC02g37210.1D2 | BnaA02g30440.1D2 |
| H176 | BnaC02g37230.1D2 | BnaA02g30470.1D2 |
| H176 | BnaC02g37270.1D2 | BnaA02g30500.1D2 |
| H176 | BnaC02g37310.1D2 | BnaA02g30530.1D2 |
| H176 | BnaC02g37440.1D2 | BnaA02g32190.1D2 |
| H176 | BnaC02g37460.1D2 | BnaA02g32180.1D2 |
| H176 | BnaC02g37470.1D2 | BnaA02g32170.1D2 |
| H176 | BnaC02g37480.1D2 | BnaA02g32170.1D2 |
| H176 | BnaC02g37500.1D2 | BnaA02g29390.1D2 |
| H176 | BnaC02g37580.1D2 | BnaA02g29990.1D2 |
| H176 | BnaC02g37700.1D2 | BnaA02g29960.1D2 |
| H176 | BnaC02g37710.1D2 | BnaA02g32160.1D2 |
| H176 | BnaC02g37720.1D2 | BnaA02g32150.1D2 |
| H176 | BnaC02g37750.1D2 | BnaA02g32140.1D2 |
| H176 | BnaC02g37810.1D2 | BnaA02g30600.1D2 |
| H176 | BnaC02g37820.1D2 | BnaA02g30610.1D2 |
| H176 | BnaC02g37840.1D2 | BnaA02g30630.1D2 |
| H176 | BnaC02g37860.1D2 | BnaA02g30660.1D2 |
| H176 | BnaC02g37880.1D2 | BnaA02g30680.1D2 |
| H176 | BnaC02g37890.1D2 | BnaA02g30690.1D2 |
| H176 | BnaC02g37950.1D2 | BnaA02g30750.1D2 |
| H176 | BnaC02g38000.1D2 | BnaA02g30790.1D2 |
| H176 | BnaC02g38040.1D2 | BnaA02g30840.1D2 |
| H176 | BnaC02g38100.1D2 | BnaA02g30940.1D2 |
| H176 | BnaC02g38180.1D2 | BnaA02g31000.1D2 |
| H176 | BnaC02g38280.1D2 | BnaA02g31120.1D2 |
| H176 | BnaC02g38300.1D2 | BnaA02g31140.1D2 |
| H176 | BnaC02g38320.1D2 | BnaA02g31160.1D2 |
| H176 | BnaC02g38350.1D2 | BnaA02g31220.1D2 |
| H176 | BnaC02g38960.1D2 | BnaA02g31290.1D2 |
| H176 | BnaC02g38970.1D2 | BnaA02g31310.1D2 |
| H176 | BnaC02g38990.1D2 | BnaA02g31320.1D2 |
| H176 | BnaC02g39150.1D2 | BnaA02g31050.1D2 |
| H176 | BnaC02g39370.1D2 | BnaA02g32110.1D2 |

|         |                  |                  |
|---------|------------------|------------------|
| R76     | BnaC02g07530.1D2 | BnaA02g02110.1D2 |
| R76     | BnaC02g07650.1D2 | BnaA02g02180.1D2 |
| R76     | BnaC02g07660.1D2 | BnaA02g02190.1D2 |
| R76     | BnaC02g07700.1D2 | BnaA02g02230.1D2 |
| R76     | BnaC02g07790.1D2 | BnaA02g02320.1D2 |
| R76     | BnaC02g07800.1D2 | BnaA02g02340.1D2 |
| R76     | BnaC02g07850.1D2 | BnaA02g02390.1D2 |
| R76     | BnaC02g08250.1D2 | BnaA02g02780.1D2 |
| R76     | BnaC02g08490.1D2 | BnaA02g04250.1D2 |
| R76     | BnaC02g08580.1D2 | BnaA02g02990.1D2 |
| R76     | BnaC02g08620.1D2 | BnaA02g03040.1D2 |
| R76     | BnaC02g08630.1D2 | BnaA02g03050.1D2 |
| R76     | BnaC02g08830.1D2 | BnaA02g03240.1D2 |
| R76     | BnaC02g08950.1D2 | BnaA02g03350.1D2 |
| R76     | BnaC02g09010.1D2 | BnaA02g03380.1D2 |
| R76     | BnaC02g09040.1D2 | BnaA02g03380.1D2 |
| R76     | BnaC02g09170.1D2 | BnaA02g03500.1D2 |
| R76     | BnaC02g09220.1D2 | BnaA02g04420.1D2 |
| R76     | BnaC02g09260.1D2 | BnaA02g04460.1D2 |
| R76     | BnaC02g09530.1D2 | BnaA02g04810.1D2 |
| R76     | BnaC02g09580.1D2 | BnaA02g04840.1D2 |
| R76     | BnaC02g10050.1D2 | BnaA02g05100.1D2 |
| R76     | BnaC02g10070.1D2 | BnaA02g05130.1D2 |
| R76     | BnaC02g10500.1D2 | BnaA02g05570.1D2 |
| R76     | BnaC02g10560.1D2 | BnaA02g05590.1D2 |
| R76     | BnaC02g10560.1D2 | BnaA02g05600.1D2 |
| R76     | BnaC02g10710.1D2 | BnaA02g05740.1D2 |
| R76     | BnaC02g12270.1D2 | BnaA02g05320.1D2 |
| R76     | BnaC02g33660.1D2 | BnaA02g26650.1D2 |
| R76     | BnaC02g37160.1D2 | BnaA02g30350.1D2 |
| R76     | BnaC02g39630.1D2 | BnaA02g32570.1D2 |
| RS_10_7 | BnaC02g00110.1D2 | BnaA02g00630.1D2 |
| RS_10_7 | BnaC02g00230.1D2 | BnaA02g00560.1D2 |
| RS_10_7 | BnaC02g00300.1D2 | BnaA02g00490.1D2 |
| RS_10_7 | BnaC02g00410.1D2 | BnaA02g00380.1D2 |
| RS_10_7 | BnaC02g00730.1D2 | BnaA02g00020.1D2 |
| RS_10_7 | BnaC02g05990.1D2 | BnaA02g00950.1D2 |
| RS_10_7 | BnaC02g06080.1D2 | BnaA02g01010.1D2 |
| RS_10_7 | BnaC02g06220.1D2 | BnaA02g04220.1D2 |
| RS_10_7 | BnaC02g06410.1D2 | BnaA02g01090.1D2 |
| RS_10_7 | BnaC02g06420.1D2 | BnaA02g01100.1D2 |
| RS_10_7 | BnaC02g06440.1D2 | BnaA02g01120.1D2 |
| RS_10_7 | BnaC02g06440.1D2 | BnaA02g01140.1D2 |
| RS_10_7 | BnaC02g06450.1D2 | BnaA02g01150.1D2 |
| RS_10_7 | BnaC02g06810.1D2 | BnaA02g01510.1D2 |
| RS_10_7 | BnaC02g06870.1D2 | BnaA02g01570.1D2 |
| RS_10_7 | BnaC02g06910.1D2 | BnaA02g01610.1D2 |
| RS_10_7 | BnaC02g06990.1D2 | BnaA02g01690.1D2 |
| RS_10_7 | BnaC02g07200.1D2 | BnaA02g01890.1D2 |
| RS_10_7 | BnaC02g07290.1D2 | BnaA02g01970.1D2 |
| RS_10_7 | BnaC02g07790.1D2 | BnaA02g02320.1D2 |



|         |                  |                  |
|---------|------------------|------------------|
| RS_10_7 | BnaC02g07850.1D2 | BnaA02g02390.1D2 |
| RS_10_7 | BnaC02g07900.1D2 | BnaA02g02480.1D2 |
| RS_10_7 | BnaC02g08100.1D2 | BnaA02g02630.1D2 |
| RS_10_7 | BnaC02g08150.1D2 | BnaA02g02680.1D2 |
| RS_10_7 | BnaC02g08490.1D2 | BnaA02g04250.1D2 |
| RS_10_7 | BnaC02g08580.1D2 | BnaA02g02990.1D2 |
| RS_10_7 | BnaC02g08630.1D2 | BnaA02g03050.1D2 |
| RS_10_7 | BnaC02g09040.1D2 | BnaA02g03380.1D2 |
| RS_10_7 | BnaC02g09150.1D2 | BnaA02g03480.1D2 |
| RS_10_7 | BnaC02g09220.1D2 | BnaA02g04420.1D2 |
| RS_10_7 | BnaC02g09560.1D2 | BnaA02g04790.1D2 |
| RS_10_7 | BnaC02g09580.1D2 | BnaA02g04840.1D2 |
| RS_10_7 | BnaC02g09710.1D2 | BnaA02g04940.1D2 |
| RS_10_7 | BnaC02g09750.1D2 | BnaA02g03890.1D2 |
| RS_10_7 | BnaC02g10070.1D2 | BnaA02g05130.1D2 |
| RS_10_7 | BnaC02g10150.1D2 | BnaA02g05180.1D2 |
| RS_10_7 | BnaC02g10190.1D2 | BnaA02g05230.1D2 |
| RS_10_7 | BnaC02g10190.1D2 | BnaA02g05260.1D2 |
| RS_10_7 | BnaC02g10280.1D2 | BnaA02g05380.1D2 |
| RS_10_7 | BnaC02g10570.1D2 | BnaA02g05610.1D2 |
| RS_10_7 | BnaC02g10780.1D2 | BnaA02g06680.1D2 |
| RS_10_7 | BnaC02g10810.1D2 | BnaA02g06710.1D2 |
| RS_10_7 | BnaC02g10930.1D2 | BnaA02g06830.1D2 |
| RS_10_7 | BnaC02g10940.1D2 | BnaA02g06840.1D2 |
| RS_10_7 | BnaC02g11120.1D2 | BnaA02g08020.1D2 |
| RS_10_7 | BnaC02g11230.1D2 | BnaA02g08200.1D2 |
| RS_10_7 | BnaC02g11290.1D2 | BnaA02g08140.1D2 |
| RS_10_7 | BnaC02g11320.1D2 | BnaA02g08170.1D2 |
| RS_10_7 | BnaC02g11550.1D2 | BnaA02g08360.1D2 |
| RS_10_7 | BnaC02g11570.1D2 | BnaA02g08370.1D2 |
| RS_10_7 | BnaC02g11590.1D2 | BnaA02g08380.1D2 |
| RS_10_7 | BnaC02g11730.1D2 | BnaA02g08530.1D2 |
| RS_10_7 | BnaC02g11800.1D2 | BnaA02g08620.1D2 |
| RS_10_7 | BnaC02g11960.1D2 | BnaA02g08780.1D2 |
| RS_10_7 | BnaC02g11970.1D2 | BnaA02g08790.1D2 |
| RS_10_7 | BnaC02g12110.1D2 | BnaA02g08930.1D2 |
| RS_10_7 | BnaC02g12250.1D2 | BnaA02g09110.1D2 |
| RS_10_7 | BnaC02g12290.1D2 | BnaA02g09120.1D2 |
| RS_10_7 | BnaC02g12440.1D2 | BnaA02g09300.1D2 |
| RS_10_7 | BnaC02g12950.1D2 | BnaA02g09770.1D2 |
| RS_10_7 | BnaC02g12980.1D2 | BnaA02g09780.1D2 |
| RS_10_7 | BnaC02g13100.1D2 | BnaA02g11230.1D2 |
| RS_10_7 | BnaC02g13910.1D2 | BnaA02g10590.1D2 |
| RS_10_7 | BnaC02g14050.1D2 | BnaA02g13340.1D2 |
| RS_10_7 | BnaC02g14130.1D2 | BnaA02g10790.1D2 |
| RS_10_7 | BnaC02g14220.1D2 | BnaA02g11090.1D2 |
| RS_10_7 | BnaC02g14310.1D2 | BnaA02g10910.1D2 |
| RS_10_7 | BnaC02g14620.1D2 | BnaA02g11380.1D2 |
| RS_10_7 | BnaC02g14640.1D2 | BnaA02g11400.1D2 |
| RS_10_7 | BnaC02g14840.1D2 | BnaA02g11530.1D2 |
| RS_10_7 | BnaC02g14860.1D2 | BnaA02g11540.1D2 |

|         |                  |                  |
|---------|------------------|------------------|
| RS_10_7 | BnaC02g14870.1D2 | BnaA02g11560.1D2 |
| RS_10_7 | BnaC02g15240.1D2 | BnaA02g11650.1D2 |
| RS_10_7 | BnaC02g15250.1D2 | BnaA02g11660.1D2 |
| RS_10_7 | BnaC02g15280.1D2 | BnaA02g11680.1D2 |
| RS_10_7 | BnaC02g15290.1D2 | BnaA02g11670.1D2 |
| RS_10_7 | BnaC02g15290.1D2 | BnaA02g11680.1D2 |
| RS_10_7 | BnaC02g15360.1D2 | BnaA02g10710.1D2 |
| RS_10_7 | BnaC02g15490.1D2 | BnaA02g07860.1D2 |
| RS_10_7 | BnaC02g15890.1D2 | BnaA02g12070.1D2 |
| RS_10_7 | BnaC02g16020.1D2 | BnaA02g12530.1D2 |
| RS_10_7 | BnaC02g16140.1D2 | BnaA02g12640.1D2 |
| RS_10_7 | BnaC02g16190.1D2 | BnaA02g12690.1D2 |
| RS_10_7 | BnaC02g16280.1D2 | BnaA02g12800.1D2 |
| RS_10_7 | BnaC02g16390.1D2 | BnaA02g12980.1D2 |
| RS_10_7 | BnaC02g16500.1D2 | BnaA02g13070.1D2 |
| RS_10_7 | BnaC02g16580.1D2 | BnaA02g13160.1D2 |
| RS_10_7 | BnaC02g17550.1D2 | BnaA02g13710.1D2 |
| RS_10_7 | BnaC02g17720.1D2 | BnaA02g13940.1D2 |
| RS_10_7 | BnaC02g17730.1D2 | BnaA02g13930.1D2 |
| RS_10_7 | BnaC02g17730.1D2 | BnaA02g13950.1D2 |
| RS_10_7 | BnaC02g17760.1D2 | BnaA02g13980.1D2 |
| RS_10_7 | BnaC02g17870.1D2 | BnaA02g13480.1D2 |
| RS_10_7 | BnaC02g17930.1D2 | BnaA02g13620.1D2 |
| RS_10_7 | BnaC02g18290.1D2 | BnaA02g14090.1D2 |
| RS_10_7 | BnaC02g18540.1D2 | BnaA02g14380.1D2 |
| RS_10_7 | BnaC02g18610.1D2 | BnaA02g14450.1D2 |
| RS_10_7 | BnaC02g18640.1D2 | BnaA02g14480.1D2 |
| RS_10_7 | BnaC02g18680.1D2 | BnaA02g14580.1D2 |
| RS_10_7 | BnaC02g19040.1D2 | BnaA02g15660.1D2 |
| RS_10_7 | BnaC02g19210.1D2 | BnaA02g14990.1D2 |
| RS_10_7 | BnaC02g19240.1D2 | BnaA02g15010.1D2 |
| RS_10_7 | BnaC02g19380.1D2 | BnaA02g15510.1D2 |
| RS_10_7 | BnaC02g19430.1D2 | BnaA02g15530.1D2 |
| RS_10_7 | BnaC02g20340.1D2 | BnaA02g15820.1D2 |
| RS_10_7 | BnaC02g20420.1D2 | BnaA02g15900.1D2 |
| RS_10_7 | BnaC02g20530.1D2 | BnaA02g15960.1D2 |
| RS_10_7 | BnaC02g20560.1D2 | BnaA02g15970.1D2 |
| RS_10_7 | BnaC02g20580.1D2 | BnaA02g15990.1D2 |
| RS_10_7 | BnaC02g20890.1D2 | BnaA02g16180.1D2 |
| RS_10_7 | BnaC02g20950.1D2 | BnaA02g16220.1D2 |
| RS_10_7 | BnaC02g20970.1D2 | BnaA02g16880.1D2 |
| RS_10_7 | BnaC02g21060.1D2 | BnaA02g16930.1D2 |
| RS_10_7 | BnaC02g21120.1D2 | BnaA02g16280.1D2 |
| RS_10_7 | BnaC02g21130.1D2 | BnaA02g16290.1D2 |
| RS_10_7 | BnaC02g21240.1D2 | BnaA02g16410.1D2 |
| RS_10_7 | BnaC02g21300.1D2 | BnaA02g16320.1D2 |
| RS_10_7 | BnaC02g21310.1D2 | BnaA02g15500.1D2 |
| RS_10_7 | BnaC02g21490.1D2 | BnaA02g16530.1D2 |
| RS_10_7 | BnaC02g21670.1D2 | BnaA02g17120.1D2 |
| RS_10_7 | BnaC02g21680.1D2 | BnaA02g17110.1D2 |
| RS_10_7 | BnaC02g21900.1D2 | BnaA02g17140.1D2 |

|         |                  |                  |
|---------|------------------|------------------|
| RS_10_7 | BnaC02g23070.1D2 | BnaA02g17060.1D2 |
| RS_10_7 | BnaC02g23100.1D2 | BnaA02g17090.1D2 |
| RS_10_7 | BnaC02g23310.1D2 | BnaA02g17790.1D2 |
| Tapidor | BnaC02g00030.1D2 | BnaA02g00710.1D2 |
| Tapidor | BnaC02g00040.1D2 | BnaA02g00700.1D2 |
| Tapidor | BnaC02g00050.1D2 | BnaA02g00690.1D2 |
| Tapidor | BnaC02g00110.1D2 | BnaA02g00630.1D2 |
| Tapidor | BnaC02g00210.1D2 | BnaA02g00580.1D2 |
| Tapidor | BnaC02g00230.1D2 | BnaA02g00560.1D2 |
| Tapidor | BnaC02g00280.1D2 | BnaA02g00510.1D2 |
| Tapidor | BnaC02g00290.1D2 | BnaA02g00500.1D2 |
| Tapidor | BnaC02g00330.1D2 | BnaA02g00460.1D2 |
| Tapidor | BnaC02g00340.1D2 | BnaA02g00750.1D2 |
| Tapidor | BnaC02g00380.1D2 | BnaA02g00410.1D2 |
| Tapidor | BnaC02g00560.1D2 | BnaA02g00220.1D2 |
| Tapidor | BnaC02g00580.1D2 | BnaA02g00200.1D2 |
| Tapidor | BnaC02g00730.1D2 | BnaA02g00020.1D2 |
| Tapidor | BnaC02g05970.1D2 | BnaA02g00910.1D2 |
| Tapidor | BnaC02g05990.1D2 | BnaA02g00950.1D2 |
| Tapidor | BnaC02g06080.1D2 | BnaA02g01010.1D2 |
| Tapidor | BnaC02g06090.1D2 | BnaA02g01010.1D2 |
| Tapidor | BnaC02g06100.1D2 | BnaA02g01020.1D2 |
| Tapidor | BnaC02g06110.1D2 | BnaA02g04040.1D2 |
| Tapidor | BnaC02g06190.1D2 | BnaA02g03950.1D2 |
| Tapidor | BnaC02g06200.1D2 | BnaA02g03940.1D2 |
| Tapidor | BnaC02g06260.1D2 | BnaA02g04290.1D2 |
| Tapidor | BnaC02g06280.1D2 | BnaA02g04310.1D2 |
| Tapidor | BnaC02g06300.1D2 | BnaA02g04170.1D2 |
| Tapidor | BnaC02g06330.1D2 | BnaA02g04060.1D2 |
| Tapidor | BnaC02g06380.1D2 | BnaA02g01060.1D2 |
| Tapidor | BnaC02g06390.1D2 | BnaA02g01070.1D2 |
| Tapidor | BnaC02g06400.1D2 | BnaA02g01080.1D2 |
| Tapidor | BnaC02g06440.1D2 | BnaA02g01120.1D2 |
| Tapidor | BnaC02g06440.1D2 | BnaA02g01140.1D2 |
| Tapidor | BnaC02g06450.1D2 | BnaA02g01150.1D2 |
| Tapidor | BnaC02g06470.1D2 | BnaA02g01190.1D2 |
| Tapidor | BnaC02g06640.1D2 | BnaA02g01350.1D2 |
| Tapidor | BnaC02g06650.1D2 | BnaA02g01360.1D2 |
| Tapidor | BnaC02g06660.1D2 | BnaA02g01370.1D2 |
| Tapidor | BnaC02g06670.1D2 | BnaA02g01380.1D2 |
| Tapidor | BnaC02g06700.1D2 | BnaA02g01440.1D2 |
| Tapidor | BnaC02g06790.1D2 | BnaA02g16940.1D2 |
| Tapidor | BnaC02g06810.1D2 | BnaA02g01510.1D2 |
| Tapidor | BnaC02g06850.1D2 | BnaA02g01550.1D2 |
| Tapidor | BnaC02g06850.1D2 | BnaA02g01560.1D2 |
| Tapidor | BnaC02g06870.1D2 | BnaA02g01570.1D2 |
| Tapidor | BnaC02g06890.1D2 | BnaA02g01590.1D2 |
| Tapidor | BnaC02g06900.1D2 | BnaA02g01600.1D2 |
| Tapidor | BnaC02g06910.1D2 | BnaA02g01610.1D2 |
| Tapidor | BnaC02g06920.1D2 | BnaA02g01620.1D2 |
| Tapidor | BnaC02g06930.1D2 | BnaA02g01630.1D2 |

|         |                  |                  |
|---------|------------------|------------------|
| Tapidor | BnaC02g06960.1D2 | BnaA02g01660.1D2 |
| Tapidor | BnaC02g06990.1D2 | BnaA02g01690.1D2 |
| Tapidor | BnaC02g07010.1D2 | BnaA02g01710.1D2 |
| Tapidor | BnaC02g07020.1D2 | BnaA02g01710.1D2 |
| Tapidor | BnaC02g07070.1D2 | BnaA02g01750.1D2 |
| Tapidor | BnaC02g07090.1D2 | BnaA02g01770.1D2 |
| Tapidor | BnaC02g07140.1D2 | BnaA02g01820.1D2 |
| Tapidor | BnaC02g07170.1D2 | BnaA02g01860.1D2 |
| Tapidor | BnaC02g07200.1D2 | BnaA02g01890.1D2 |
| Tapidor | BnaC02g07270.1D2 | BnaA02g01950.1D2 |
| Tapidor | BnaC02g07280.1D2 | BnaA02g01960.1D2 |
| Tapidor | BnaC02g07310.1D2 | BnaA02g01990.1D2 |
| Tapidor | BnaC02g07320.1D2 | BnaA02g02000.1D2 |
| Tapidor | BnaC02g07370.1D2 | BnaA02g02020.1D2 |
| Tapidor | BnaC02g07410.1D2 | BnaA02g02070.1D2 |
| Tapidor | BnaC02g07440.1D2 | BnaA02g02090.1D2 |
| Tapidor | BnaC02g07520.1D2 | BnaA02g02100.1D2 |
| Tapidor | BnaC02g07530.1D2 | BnaA02g02110.1D2 |
| Tapidor | BnaC02g07660.1D2 | BnaA02g02190.1D2 |
| Tapidor | BnaC02g07700.1D2 | BnaA02g02230.1D2 |
| Tapidor | BnaC02g07790.1D2 | BnaA02g02320.1D2 |
| Tapidor | BnaC02g07800.1D2 | BnaA02g02340.1D2 |
| Tapidor | BnaC02g07810.1D2 | BnaA02g02350.1D2 |
| Tapidor | BnaC02g07830.1D2 | BnaA02g02370.1D2 |
| Tapidor | BnaC02g07850.1D2 | BnaA02g02390.1D2 |
| Tapidor | BnaC02g07860.1D2 | BnaA02g02400.1D2 |
| Tapidor | BnaC02g07890.1D2 | BnaA02g02470.1D2 |
| Tapidor | BnaC02g07900.1D2 | BnaA02g02480.1D2 |
| Tapidor | BnaC02g07940.1D2 | BnaA02g02520.1D2 |
| Tapidor | BnaC02g08000.1D2 | BnaA02g02550.1D2 |
| Tapidor | BnaC02g08030.1D2 | BnaA02g02560.1D2 |
| Tapidor | BnaC02g08050.1D2 | BnaA02g02580.1D2 |
| Tapidor | BnaC02g08090.1D2 | BnaA02g02620.1D2 |
| Tapidor | BnaC02g08100.1D2 | BnaA02g02630.1D2 |
| Tapidor | BnaC02g08120.1D2 | BnaA02g02650.1D2 |
| Tapidor | BnaC02g08150.1D2 | BnaA02g02680.1D2 |
| Tapidor | BnaC02g08190.1D2 | BnaA02g02720.1D2 |
| Tapidor | BnaC02g08200.1D2 | BnaA02g02730.1D2 |
| Tapidor | BnaC02g08210.1D2 | BnaA02g02740.1D2 |
| Tapidor | BnaC02g08290.1D2 | BnaA02g02820.1D2 |
| Tapidor | BnaC02g08300.1D2 | BnaA02g02830.1D2 |
| Tapidor | BnaC02g08340.1D2 | BnaA02g02870.1D2 |
| Tapidor | BnaC02g08370.1D2 | BnaA02g02900.1D2 |
| Tapidor | BnaC02g08380.1D2 | BnaA02g02910.1D2 |
| Tapidor | BnaC02g08390.1D2 | BnaA02g02920.1D2 |
| Tapidor | BnaC02g08490.1D2 | BnaA02g04250.1D2 |
| Tapidor | BnaC02g08620.1D2 | BnaA02g03040.1D2 |
| Tapidor | BnaC02g08630.1D2 | BnaA02g03050.1D2 |
| Tapidor | BnaC02g08680.1D2 | BnaA02g03090.1D2 |
| Tapidor | BnaC02g08800.1D2 | BnaA02g03210.1D2 |
| Tapidor | BnaC02g08810.1D2 | BnaA02g03220.1D2 |

|         |                  |                  |
|---------|------------------|------------------|
| Tapidor | BnaC02g08850.1D2 | BnaA02g03260.1D2 |
| Tapidor | BnaC02g08860.1D2 | BnaA02g03270.1D2 |
| Tapidor | BnaC02g08890.1D2 | BnaA02g03300.1D2 |
| Tapidor | BnaC02g08900.1D2 | BnaA02g03310.1D2 |
| Tapidor | BnaC02g08950.1D2 | BnaA02g03350.1D2 |
| Tapidor | BnaC02g08960.1D2 | BnaA02g03360.1D2 |
| Tapidor | BnaC02g09010.1D2 | BnaA02g03380.1D2 |
| Tapidor | BnaC02g09040.1D2 | BnaA02g03380.1D2 |
| Tapidor | BnaC02g09090.1D2 | BnaA02g03430.1D2 |
| Tapidor | BnaC02g09200.1D2 | BnaA02g04400.1D2 |
| Tapidor | BnaC02g09220.1D2 | BnaA02g04420.1D2 |
| Tapidor | BnaC02g09450.1D2 | BnaA02g03720.1D2 |
| Tapidor | BnaC02g09470.1D2 | BnaA02g04790.1D2 |
| Tapidor | BnaC02g09480.1D2 | BnaA02g04800.1D2 |
| Tapidor | BnaC02g09490.1D2 | BnaA02g04780.1D2 |
| Tapidor | BnaC02g09550.1D2 | BnaA02g04800.1D2 |
| Tapidor | BnaC02g09710.1D2 | BnaA02g04940.1D2 |
| Tapidor | BnaC02g09730.1D2 | BnaA02g03910.1D2 |
| Tapidor | BnaC02g09860.1D2 | BnaA02g03780.1D2 |
| Tapidor | BnaC02g09900.1D2 | BnaA02g04970.1D2 |
| Tapidor | BnaC02g09960.1D2 | BnaA02g05020.1D2 |
| Tapidor | BnaC02g10050.1D2 | BnaA02g05100.1D2 |
| Tapidor | BnaC02g10070.1D2 | BnaA02g05130.1D2 |
| Tapidor | BnaC02g10130.1D2 | BnaA02g05160.1D2 |
| Tapidor | BnaC02g10150.1D2 | BnaA02g05180.1D2 |
| Tapidor | BnaC02g10360.1D2 | BnaA02g05420.1D2 |
| Tapidor | BnaC02g10460.1D2 | BnaA02g05510.1D2 |
| Tapidor | BnaC02g10600.1D2 | BnaA02g05640.1D2 |
| Tapidor | BnaC02g10660.1D2 | BnaA02g05690.1D2 |
| Tapidor | BnaC02g10710.1D2 | BnaA02g05740.1D2 |
| Tapidor | BnaC02g12270.1D2 | BnaA02g05320.1D2 |
| Tapidor | BnaC02g13720.1D2 | BnaA02g10260.1D2 |
| H165    | BnaC02g11090.1D2 | BnaA02g07980.1D2 |
| H165    | BnaC02g11130.1D2 | BnaA02g08030.1D2 |
| H165    | BnaC02g11160.1D2 | BnaA02g08060.1D2 |
| H165    | BnaC02g11200.1D2 | BnaA02g08090.1D2 |
| H165    | BnaC02g11460.1D2 | BnaA02g08280.1D2 |
| H165    | BnaC02g11550.1D2 | BnaA02g08360.1D2 |
| H165    | BnaC02g11560.1D2 | BnaA02g08370.1D2 |
| H165    | BnaC02g11590.1D2 | BnaA02g08380.1D2 |
| H165    | BnaC02g11730.1D2 | BnaA02g08530.1D2 |
| H165    | BnaC02g11800.1D2 | BnaA02g08620.1D2 |
| H165    | BnaC02g11930.1D2 | BnaA02g08770.1D2 |
| H165    | BnaC02g11970.1D2 | BnaA02g08790.1D2 |
| H165    | BnaC02g11990.1D2 | BnaA02g08810.1D2 |
| H165    | BnaC02g12070.1D2 | BnaA02g08890.1D2 |
| H165    | BnaC02g12080.1D2 | BnaA02g08900.1D2 |
| H165    | BnaC02g12100.1D2 | BnaA02g08920.1D2 |
| H165    | BnaC02g12110.1D2 | BnaA02g08930.1D2 |
| H165    | BnaC02g12120.1D2 | BnaA02g08940.1D2 |
| H165    | BnaC02g12250.1D2 | BnaA02g09110.1D2 |

|      |                  |                  |
|------|------------------|------------------|
| H165 | BnaC02g12290.1D2 | BnaA02g09120.1D2 |
| H165 | BnaC02g12440.1D2 | BnaA02g09300.1D2 |
| H165 | BnaC02g12530.1D2 | BnaA02g09380.1D2 |
| H165 | BnaC02g12590.1D2 | BnaA02g09420.1D2 |
| H165 | BnaC02g12740.1D2 | BnaA02g09520.1D2 |
| H165 | BnaC02g12750.1D2 | BnaA02g09520.1D2 |
| H165 | BnaC02g12930.1D2 | BnaA02g09750.1D2 |
| H165 | BnaC02g13090.1D2 | BnaA02g10310.1D2 |
| H165 | BnaC02g13100.1D2 | BnaA02g11230.1D2 |
| H165 | BnaC02g13280.1D2 | BnaA02g09890.1D2 |
| H165 | BnaC02g13300.1D2 | BnaA02g09910.1D2 |
| H165 | BnaC02g13590.1D2 | BnaA02g10120.1D2 |
| H165 | BnaC02g13730.1D2 | BnaA02g10270.1D2 |
| H165 | BnaC02g13790.1D2 | BnaA02g10410.1D2 |
| H165 | BnaC02g13820.1D2 | BnaA02g10520.1D2 |
| H165 | BnaC02g13830.1D2 | BnaA02g10530.1D2 |
| H165 | BnaC02g13980.1D2 | BnaA02g09280.1D2 |
| H165 | BnaC02g14050.1D2 | BnaA02g13340.1D2 |
| H165 | BnaC02g14090.1D2 | BnaA02g10750.1D2 |
| H165 | BnaC02g14100.1D2 | BnaA02g10760.1D2 |
| H165 | BnaC02g14150.1D2 | BnaA02g10810.1D2 |
| H165 | BnaC02g14210.1D2 | BnaA02g11060.1D2 |
| H165 | BnaC02g14250.1D2 | BnaA02g10650.1D2 |
| H165 | BnaC02g14260.1D2 | BnaA02g10640.1D2 |
| H165 | BnaC02g14290.1D2 | BnaA02g10890.1D2 |
| H165 | BnaC02g14310.1D2 | BnaA02g10910.1D2 |
| H165 | BnaC02g14330.1D2 | BnaA02g10930.1D2 |
| H165 | BnaC02g14400.1D2 | BnaA02g10990.1D2 |
| H165 | BnaC02g14610.1D2 | BnaA02g11370.1D2 |
| H165 | BnaC02g14620.1D2 | BnaA02g11380.1D2 |
| H165 | BnaC02g14740.1D2 | BnaA02g11460.1D2 |
| H165 | BnaC02g14770.1D2 | BnaA02g11480.1D2 |
| H165 | BnaC02g14810.1D2 | BnaA02g11500.1D2 |
| H165 | BnaC02g14830.1D2 | BnaA02g11520.1D2 |
| H165 | BnaC02g14840.1D2 | BnaA02g11530.1D2 |
| H165 | BnaC02g14870.1D2 | BnaA02g11560.1D2 |
| H165 | BnaC02g14980.1D2 | BnaA02g11590.1D2 |
| H165 | BnaC02g14990.1D2 | BnaA02g11610.1D2 |
| H165 | BnaC02g15010.1D2 | BnaA02g11630.1D2 |
| H165 | BnaC02g15240.1D2 | BnaA02g11650.1D2 |
| H165 | BnaC02g15250.1D2 | BnaA02g11660.1D2 |
| H165 | BnaC02g15290.1D2 | BnaA02g11670.1D2 |
| H165 | BnaC02g15290.1D2 | BnaA02g11680.1D2 |
| H165 | BnaC02g15570.1D2 | BnaA02g11710.1D2 |
| H165 | BnaC02g15580.1D2 | BnaA02g11720.1D2 |
| H165 | BnaC02g15610.1D2 | BnaA02g11760.1D2 |
| H165 | BnaC02g15630.1D2 | BnaA02g11790.1D2 |
| H165 | BnaC02g15840.1D2 | BnaA02g12010.1D2 |
| H165 | BnaC02g15860.1D2 | BnaA02g12030.1D2 |
| H165 | BnaC02g15880.1D2 | BnaA02g12040.1D2 |
| H165 | BnaC02g15970.1D2 | BnaA02g12510.1D2 |

|      |                  |                  |
|------|------------------|------------------|
| H165 | BnaC02g15990.1D2 | BnaA02g12160.1D2 |
| H165 | BnaC02g16020.1D2 | BnaA02g12530.1D2 |
| H165 | BnaC02g16070.1D2 | BnaA02g12570.1D2 |
| H165 | BnaC02g16140.1D2 | BnaA02g12640.1D2 |
| H165 | BnaC02g16200.1D2 | BnaA02g12690.1D2 |
| H165 | BnaC02g16260.1D2 | BnaA02g12770.1D2 |
| H165 | BnaC02g16280.1D2 | BnaA02g12800.1D2 |
| H165 | BnaC02g16390.1D2 | BnaA02g12980.1D2 |
| H165 | BnaC02g16440.1D2 | BnaA02g13040.1D2 |
| H165 | BnaC02g16500.1D2 | BnaA02g13070.1D2 |
| H165 | BnaC02g16560.1D2 | BnaA02g13150.1D2 |
| H165 | BnaC02g16580.1D2 | BnaA02g13160.1D2 |
| H165 | BnaC02g16590.1D2 | BnaA02g13170.1D2 |
| H165 | BnaC02g16600.1D2 | BnaA02g13180.1D2 |
| H165 | BnaC02g16610.1D2 | BnaA02g13190.1D2 |
| H165 | BnaC02g16650.1D2 | BnaA02g13230.1D2 |
| H165 | BnaC02g16680.1D2 | BnaA02g13260.1D2 |
| H165 | BnaC02g17100.1D2 | BnaA02g34780.1D2 |
| H165 | BnaC02g17120.1D2 | BnaA02g34780.1D2 |
| H165 | BnaC02g17210.1D2 | BnaA02g11690.1D2 |
| H165 | BnaC02g17320.1D2 | BnaA02g35280.1D2 |
| H165 | BnaC02g17380.1D2 | BnaA02g35260.1D2 |
| H165 | BnaC02g17550.1D2 | BnaA02g13710.1D2 |
| H165 | BnaC02g17710.1D2 | BnaA02g13930.1D2 |
| H165 | BnaC02g17720.1D2 | BnaA02g13940.1D2 |
| H165 | BnaC02g17730.1D2 | BnaA02g13930.1D2 |
| H165 | BnaC02g17730.1D2 | BnaA02g13950.1D2 |
| H165 | BnaC02g17760.1D2 | BnaA02g13980.1D2 |
| H165 | BnaC02g17810.1D2 | BnaA02g13460.1D2 |
| H165 | BnaC02g17820.1D2 | BnaA02g13450.1D2 |
| H165 | BnaC02g17830.1D2 | BnaA02g13440.1D2 |
| H165 | BnaC02g17870.1D2 | BnaA02g13480.1D2 |
| H165 | BnaC02g18200.1D2 | BnaA02g13310.1D2 |
| H165 | BnaC02g18260.1D2 | BnaA02g14040.1D2 |
| H165 | BnaC02g18300.1D2 | BnaA02g14100.1D2 |
| H165 | BnaC02g18420.1D2 | BnaA02g14330.1D2 |
| H165 | BnaC02g18430.1D2 | BnaA02g14350.1D2 |
| H165 | BnaC02g18540.1D2 | BnaA02g14380.1D2 |
| H165 | BnaC02g18550.1D2 | BnaA02g14380.1D2 |
| H165 | BnaC02g18610.1D2 | BnaA02g14450.1D2 |
| H165 | BnaC02g18640.1D2 | BnaA02g14480.1D2 |
| H165 | BnaC02g18690.1D2 | BnaA02g14590.1D2 |
| H165 | BnaC02g18830.1D2 | BnaA02g14760.1D2 |
| H165 | BnaC02g18960.1D2 | BnaA02g14910.1D2 |
| H165 | BnaC02g18980.1D2 | BnaA02g15720.1D2 |
| H165 | BnaC02g19040.1D2 | BnaA02g15660.1D2 |
| H165 | BnaC02g19080.1D2 | BnaA02g14920.1D2 |
| H165 | BnaC02g19110.1D2 | BnaA02g14930.1D2 |
| H165 | BnaC02g19190.1D2 | BnaA02g14960.1D2 |
| H165 | BnaC02g19210.1D2 | BnaA02g14990.1D2 |
| H165 | BnaC02g19240.1D2 | BnaA02g15010.1D2 |

|      |                  |                  |
|------|------------------|------------------|
| H165 | BnaC02g19260.1D2 | BnaA02g15030.1D2 |
| H165 | BnaC02g19280.1D2 | BnaA02g15060.1D2 |
| H165 | BnaC02g19310.1D2 | BnaA02g15080.1D2 |
| H165 | BnaC02g19320.1D2 | BnaA02g15090.1D2 |
| H165 | BnaC02g19330.1D2 | BnaA02g15100.1D2 |
| H165 | BnaC02g19340.1D2 | BnaA02g15460.1D2 |
| H165 | BnaC02g19380.1D2 | BnaA02g15510.1D2 |
| H165 | BnaC02g19420.1D2 | BnaA02g15520.1D2 |
| H165 | BnaC02g19460.1D2 | BnaA02g14560.1D2 |
| H165 | BnaC02g19560.1D2 | BnaA02g15640.1D2 |
| H165 | BnaC02g19590.1D2 | BnaA02g15620.1D2 |
| H165 | BnaC02g19600.1D2 | BnaA02g15610.1D2 |
| H165 | BnaC02g19620.1D2 | BnaA02g15590.1D2 |
| H165 | BnaC02g19630.1D2 | BnaA02g15580.1D2 |
| H165 | BnaC02g19710.1D2 | BnaA02g14670.1D2 |
| H165 | BnaC02g19740.1D2 | BnaA02g14240.1D2 |
| H165 | BnaC02g19780.1D2 | BnaA02g14290.1D2 |
| H165 | BnaC02g19850.1D2 | BnaA02g14150.1D2 |
| H165 | BnaC02g19880.1D2 | BnaA02g14170.1D2 |
| H165 | BnaC02g19890.1D2 | BnaA02g14180.1D2 |
| H165 | BnaC02g19900.1D2 | BnaA02g14190.1D2 |
| H165 | BnaC02g19910.1D2 | BnaA02g14210.1D2 |
| H165 | BnaC02g19950.1D2 | BnaA02g15200.1D2 |
| H165 | BnaC02g19960.1D2 | BnaA02g15210.1D2 |
| H165 | BnaC02g19980.1D2 | BnaA02g15230.1D2 |
| H165 | BnaC02g19990.1D2 | BnaA02g15230.1D2 |
| H165 | BnaC02g20040.1D2 | BnaA02g15280.1D2 |
| H165 | BnaC02g20120.1D2 | BnaA02g15310.1D2 |
| H165 | BnaC02g20290.1D2 | BnaA02g15760.1D2 |
| H165 | BnaC02g20310.1D2 | BnaA02g15790.1D2 |
| H165 | BnaC02g20400.1D2 | BnaA02g15890.1D2 |
| H165 | BnaC02g20420.1D2 | BnaA02g15900.1D2 |
| H165 | BnaC02g20430.1D2 | BnaA02g15910.1D2 |
| H165 | BnaC02g20490.1D2 | BnaA02g15940.1D2 |
| H165 | BnaC02g20530.1D2 | BnaA02g15960.1D2 |
| H165 | BnaC02g20560.1D2 | BnaA02g15970.1D2 |
| H165 | BnaC02g20580.1D2 | BnaA02g15990.1D2 |
| H165 | BnaC02g20590.1D2 | BnaA02g16000.1D2 |
| H165 | BnaC02g20620.1D2 | BnaA02g16020.1D2 |
| H165 | BnaC02g20630.1D2 | BnaA02g16030.1D2 |
| H165 | BnaC02g20680.1D2 | BnaA02g16920.1D2 |
| H165 | BnaC02g20770.1D2 | BnaA02g16120.1D2 |
| H165 | BnaC02g20830.1D2 | BnaA02g16160.1D2 |
| H165 | BnaC02g20890.1D2 | BnaA02g16180.1D2 |
| H165 | BnaC02g20930.1D2 | BnaA02g16200.1D2 |
| H165 | BnaC02g20950.1D2 | BnaA02g16220.1D2 |
| H165 | BnaC02g20960.1D2 | BnaA02g16230.1D2 |
| H165 | BnaC02g20970.1D2 | BnaA02g16880.1D2 |
| H165 | BnaC02g21060.1D2 | BnaA02g16930.1D2 |
| H165 | BnaC02g21100.1D2 | BnaA02g16260.1D2 |
| H165 | BnaC02g21120.1D2 | BnaA02g16280.1D2 |



|      |                  |                  |
|------|------------------|------------------|
| H165 | BnaC02g21130.1D2 | BnaA02g16290.1D2 |
| H165 | BnaC02g21150.1D2 | BnaA02g16340.1D2 |
| H165 | BnaC02g21180.1D2 | BnaA02g16360.1D2 |
| H165 | BnaC02g21240.1D2 | BnaA02g16410.1D2 |
| H165 | BnaC02g21300.1D2 | BnaA02g16320.1D2 |
| H165 | BnaC02g21310.1D2 | BnaA02g15500.1D2 |
| H165 | BnaC02g21360.1D2 | BnaA02g15850.1D2 |
| H165 | BnaC02g21370.1D2 | BnaA02g15840.1D2 |
| H165 | BnaC02g21400.1D2 | BnaA02g15490.1D2 |
| H165 | BnaC02g21490.1D2 | BnaA02g16530.1D2 |
| H165 | BnaC02g21570.1D2 | BnaA02g16600.1D2 |
| H165 | BnaC02g21580.1D2 | BnaA02g16610.1D2 |
| H165 | BnaC02g21590.1D2 | BnaA02g16620.1D2 |
| H165 | BnaC02g21600.1D2 | BnaA02g16630.1D2 |
| H165 | BnaC02g21670.1D2 | BnaA02g17120.1D2 |
| H165 | BnaC02g21680.1D2 | BnaA02g17110.1D2 |
| H165 | BnaC02g21730.1D2 | BnaA02g16700.1D2 |
| H165 | BnaC02g21740.1D2 | BnaA02g16710.1D2 |
| H165 | BnaC02g21750.1D2 | BnaA02g16720.1D2 |
| H165 | BnaC02g21910.1D2 | BnaA02g17150.1D2 |
| H165 | BnaC02g22020.1D2 | BnaA02g17190.1D2 |
| H165 | BnaC02g22050.1D2 | BnaA02g17210.1D2 |
| H165 | BnaC02g22220.1D2 | BnaA02g20280.1D2 |
| H165 | BnaC02g22230.1D2 | BnaA02g20270.1D2 |
| H165 | BnaC02g22240.1D2 | BnaA02g20260.1D2 |
| H165 | BnaC02g22290.1D2 | BnaA02g17470.1D2 |
| H165 | BnaC02g22340.1D2 | BnaA02g17500.1D2 |
| H165 | BnaC02g22370.1D2 | BnaA02g17520.1D2 |
| H165 | BnaC02g22470.1D2 | BnaA02g15870.1D2 |
| H165 | BnaC02g22490.1D2 | BnaA02g17330.1D2 |
| H165 | BnaC02g22510.1D2 | BnaA02g17300.1D2 |
| H165 | BnaC02g22720.1D2 | BnaA02g17370.1D2 |
| H165 | BnaC02g22750.1D2 | BnaA02g17340.1D2 |
| H165 | BnaC02g22820.1D2 | BnaA02g18030.1D2 |
| H165 | BnaC02g22830.1D2 | BnaA02g18020.1D2 |
| H165 | BnaC02g23030.1D2 | BnaA02g16780.1D2 |
| H165 | BnaC02g23040.1D2 | BnaA02g16770.1D2 |
| H165 | BnaC02g23060.1D2 | BnaA02g17050.1D2 |
| H165 | BnaC02g23070.1D2 | BnaA02g17060.1D2 |
| H165 | BnaC02g23080.1D2 | BnaA02g17070.1D2 |
| H165 | BnaC02g23100.1D2 | BnaA02g17090.1D2 |
| H165 | BnaC02g23180.1D2 | BnaA02g17660.1D2 |
| H165 | BnaC02g23190.1D2 | BnaA02g17670.1D2 |
| H165 | BnaC02g23260.1D2 | BnaA02g17750.1D2 |
| H165 | BnaC02g23270.1D2 | BnaA02g17760.1D2 |
| H165 | BnaC02g23600.1D2 | BnaA02g19420.1D2 |
| H165 | BnaC02g23610.1D2 | BnaA02g19400.1D2 |
| H165 | BnaC02g23620.1D2 | BnaA02g19390.1D2 |
| H165 | BnaC02g23630.1D2 | BnaA02g21180.1D2 |
| H165 | BnaC02g23750.1D2 | BnaA02g20780.1D2 |
| H165 | BnaC02g23760.1D2 | BnaA02g20790.1D2 |

|      |                  |                  |
|------|------------------|------------------|
| H165 | BnaC02g23790.1D2 | BnaA02g20820.1D2 |
| H165 | BnaC02g23800.1D2 | BnaA02g20830.1D2 |
| H165 | BnaC02g23820.1D2 | BnaA02g20840.1D2 |
| H165 | BnaC02g23850.1D2 | BnaA02g20870.1D2 |
| H165 | BnaC02g23860.1D2 | BnaA02g20880.1D2 |
| H165 | BnaC02g23870.1D2 | BnaA02g20890.1D2 |
| H165 | BnaC02g23930.1D2 | BnaA02g20980.1D2 |
| H165 | BnaC02g23940.1D2 | BnaA02g20990.1D2 |
| H165 | BnaC02g23960.1D2 | BnaA02g21010.1D2 |
| H165 | BnaC02g24130.1D2 | BnaA02g22020.1D2 |
| H165 | BnaC02g24140.1D2 | BnaA02g22040.1D2 |
| H165 | BnaC02g24150.1D2 | BnaA02g20320.1D2 |
| H165 | BnaC02g24170.1D2 | BnaA02g19240.1D2 |
| H165 | BnaC02g24210.1D2 | BnaA02g20060.1D2 |
| H165 | BnaC02g24250.1D2 | BnaA02g20620.1D2 |
| H165 | BnaC02g24260.1D2 | BnaA02g20610.1D2 |
| H165 | BnaC02g24270.1D2 | BnaA02g20600.1D2 |
| H165 | BnaC02g24370.1D2 | BnaA02g18400.1D2 |
| H165 | BnaC02g24380.1D2 | BnaA02g18390.1D2 |
| H165 | BnaC02g24410.1D2 | BnaA02g18370.1D2 |
| H165 | BnaC02g24430.1D2 | BnaA02g18340.1D2 |
| H165 | BnaC02g24440.1D2 | BnaA02g18340.1D2 |
| H165 | BnaC02g24480.1D2 | BnaA02g18280.1D2 |
| H165 | BnaC02g24520.1D2 | BnaA02g18260.1D2 |
| H165 | BnaC02g24530.1D2 | BnaA02g18250.1D2 |
| H165 | BnaC02g24900.1D2 | BnaA02g18470.1D2 |
| H165 | BnaC02g24940.1D2 | BnaA02g18500.1D2 |
| H165 | BnaC02g24950.1D2 | BnaA02g18510.1D2 |
| H165 | BnaC02g24960.1D2 | BnaA02g18520.1D2 |
| H165 | BnaC02g25020.1D2 | BnaA02g18190.1D2 |
| H165 | BnaC02g25040.1D2 | BnaA02g18170.1D2 |
| H165 | BnaC02g25330.1D2 | BnaA02g19520.1D2 |
| H165 | BnaC02g25350.1D2 | BnaA02g19540.1D2 |
| H165 | BnaC02g25370.1D2 | BnaA02g19560.1D2 |
| H165 | BnaC02g25420.1D2 | BnaA02g19610.1D2 |
| H165 | BnaC02g25460.1D2 | BnaA02g19640.1D2 |
| H165 | BnaC02g25490.1D2 | BnaA02g19660.1D2 |
| H165 | BnaC02g25560.1D2 | BnaA02g19750.1D2 |
| H165 | BnaC02g25650.1D2 | BnaA02g19770.1D2 |
| H165 | BnaC02g25660.1D2 | BnaA02g19780.1D2 |
| H165 | BnaC02g25680.1D2 | BnaA02g19810.1D2 |
| H165 | BnaC02g25690.1D2 | BnaA02g19820.1D2 |
| H165 | BnaC02g25710.1D2 | BnaA02g19830.1D2 |
| H165 | BnaC02g25720.1D2 | BnaA02g19840.1D2 |
| H165 | BnaC02g25770.1D2 | BnaA02g20460.1D2 |
| H165 | BnaC02g25800.1D2 | BnaA02g19870.1D2 |
| H165 | BnaC02g25820.1D2 | BnaA02g19900.1D2 |
| H165 | BnaC02g25920.1D2 | BnaA02g19260.1D2 |
| H165 | BnaC02g26020.1D2 | BnaA02g20370.1D2 |
| H165 | BnaC02g26110.1D2 | BnaA02g17450.1D2 |
| H165 | BnaC02g26330.1D2 | BnaA02g19120.1D2 |

|      |                  |                  |
|------|------------------|------------------|
| H165 | BnaC02g26500.1D2 | BnaA02g20630.1D2 |
| H165 | BnaC02g26550.1D2 | BnaA02g21940.1D2 |
| H165 | BnaC02g26570.1D2 | BnaA02g21950.1D2 |
| H165 | BnaC02g26620.1D2 | BnaA02g21890.1D2 |
| H165 | BnaC02g26810.1D2 | BnaA02g21740.1D2 |
| H165 | BnaC02g26860.1D2 | BnaA02g21690.1D2 |
| H165 | BnaC02g27270.1D2 | BnaA02g19950.1D2 |
| H165 | BnaC02g27340.1D2 | BnaA02g22320.1D2 |
| H165 | BnaC02g27350.1D2 | BnaA02g22340.1D2 |
| H165 | BnaC02g27410.1D2 | BnaA02g22360.1D2 |
| H165 | BnaC02g27590.1D2 | BnaA02g21390.1D2 |
| H165 | BnaC02g27610.1D2 | BnaA02g21400.1D2 |
| H165 | BnaC02g27780.1D2 | BnaA02g22050.1D2 |
| H165 | BnaC02g27960.1D2 | BnaA02g23830.1D2 |
| H165 | BnaC02g27970.1D2 | BnaA02g23840.1D2 |
| H165 | BnaC02g28050.1D2 | BnaA02g23900.1D2 |
| H165 | BnaC02g28080.1D2 | BnaA02g22750.1D2 |
| H165 | BnaC02g28230.1D2 | BnaA02g22850.1D2 |
| H165 | BnaC02g28240.1D2 | BnaA02g22860.1D2 |
| H165 | BnaC02g28250.1D2 | BnaA02g22890.1D2 |
| H165 | BnaC02g28300.1D2 | BnaA02g22920.1D2 |
| H165 | BnaC02g28320.1D2 | BnaA02g22960.1D2 |
| H165 | BnaC02g28530.1D2 | BnaA02g23810.1D2 |
| H165 | BnaC02g28570.1D2 | BnaA02g23710.1D2 |
| H165 | BnaC02g28640.1D2 | BnaA02g23680.1D2 |
| H165 | BnaC02g28710.1D2 | BnaA02g23940.1D2 |
| H165 | BnaC02g28910.1D2 | BnaA02g23130.1D2 |
| H165 | BnaC02g28930.1D2 | BnaA02g23150.1D2 |
| H165 | BnaC02g29140.1D2 | BnaA02g23290.1D2 |
| H165 | BnaC02g29370.1D2 | BnaA02g23410.1D2 |
| H165 | BnaC02g29410.1D2 | BnaA02g23440.1D2 |
| H165 | BnaC02g29550.1D2 | BnaA02g23520.1D2 |
| H165 | BnaC02g29610.1D2 | BnaA02g21560.1D2 |
| H165 | BnaC02g29620.1D2 | BnaA02g23020.1D2 |
| H165 | BnaC02g29740.1D2 | BnaA02g22700.1D2 |
| H165 | BnaC02g29790.1D2 | BnaA02g24120.1D2 |
| H165 | BnaC02g29810.1D2 | BnaA02g24120.1D2 |
| H165 | BnaC02g29830.1D2 | BnaA02g24100.1D2 |
| H165 | BnaC02g29890.1D2 | BnaA02g20450.1D2 |
| H165 | BnaC02g30030.1D2 | BnaA02g24190.1D2 |
| H165 | BnaC02g30180.1D2 | BnaA02g24340.1D2 |
| H165 | BnaC02g30250.1D2 | BnaA02g22230.1D2 |
| H165 | BnaC02g30400.1D2 | BnaA02g24460.1D2 |
| H165 | BnaC02g30480.1D2 | BnaA02g24540.1D2 |
| H165 | BnaC02g30490.1D2 | BnaA02g24550.1D2 |
| H165 | BnaC02g30580.1D2 | BnaA02g24660.1D2 |
| H165 | BnaC02g30610.1D2 | BnaA02g24690.1D2 |
| H165 | BnaC02g30640.1D2 | BnaA02g24700.1D2 |
| H165 | BnaC02g30670.1D2 | BnaA02g24780.1D2 |
| H165 | BnaC02g30950.1D2 | BnaA02g25210.1D2 |
| H165 | BnaC02g31090.1D2 | BnaA02g21220.1D2 |

|      |                  |                  |
|------|------------------|------------------|
| H165 | BnaC02g31290.1D2 | BnaA02g22610.1D2 |
| H165 | BnaC02g31300.1D2 | BnaA02g22600.1D2 |
| H165 | BnaC02g31350.1D2 | BnaA02g22570.1D2 |
| H165 | BnaC02g31440.1D2 | BnaA02g24810.1D2 |
| H165 | BnaC02g31530.1D2 | BnaA02g25530.1D2 |
| H165 | BnaC02g31540.1D2 | BnaA02g25520.1D2 |
| H165 | BnaC02g31550.1D2 | BnaA02g25510.1D2 |
| H165 | BnaC02g31690.1D2 | BnaA02g24900.1D2 |
| H165 | BnaC02g31710.1D2 | BnaA02g24910.1D2 |
| H165 | BnaC02g31740.1D2 | BnaA02g25070.1D2 |
| H165 | BnaC02g31820.1D2 | BnaA02g25000.1D2 |
| H165 | BnaC02g31860.1D2 | BnaA02g24640.1D2 |
| H165 | BnaC02g31910.1D2 | BnaA02g25140.1D2 |
| H165 | BnaC02g31930.1D2 | BnaA02g25170.1D2 |
| H165 | BnaC02g31940.1D2 | BnaA02g25180.1D2 |
| H165 | BnaC02g31950.1D2 | BnaA02g25190.1D2 |
| H165 | BnaC02g31970.1D2 | BnaA02g25200.1D2 |
| H165 | BnaC02g31990.1D2 | BnaA02g25220.1D2 |
| H165 | BnaC02g32020.1D2 | BnaA02g25260.1D2 |
| H165 | BnaC02g32030.1D2 | BnaA02g25270.1D2 |
| H165 | BnaC02g32060.1D2 | BnaA02g25570.1D2 |
| H165 | BnaC02g32070.1D2 | BnaA02g25580.1D2 |
| H165 | BnaC02g32090.1D2 | BnaA02g25600.1D2 |
| H165 | BnaC02g32100.1D2 | BnaA02g25610.1D2 |
| H165 | BnaC02g32120.1D2 | BnaA02g25630.1D2 |
| H165 | BnaC02g32130.1D2 | BnaA02g25640.1D2 |
| H165 | BnaC02g32150.1D2 | BnaA02g25660.1D2 |
| H165 | BnaC02g32310.1D2 | BnaA02g26970.1D2 |
| H165 | BnaC02g32380.1D2 | BnaA02g26920.1D2 |
| H165 | BnaC02g32390.1D2 | BnaA02g27170.1D2 |
| H165 | BnaC02g32430.1D2 | BnaA02g26900.1D2 |
| H165 | BnaC02g32450.1D2 | BnaA02g26880.1D2 |
| H165 | BnaC02g32460.1D2 | BnaA02g26870.1D2 |
| H165 | BnaC02g32470.1D2 | BnaA02g26860.1D2 |
| H165 | BnaC02g32490.1D2 | BnaA02g26840.1D2 |
| H165 | BnaC02g32510.1D2 | BnaA02g26830.1D2 |
| H165 | BnaC02g32550.1D2 | BnaA02g26810.1D2 |
| H165 | BnaC02g32560.1D2 | BnaA02g26800.1D2 |
| H165 | BnaC02g32590.1D2 | BnaA02g26780.1D2 |
| H165 | BnaC02g32600.1D2 | BnaA02g26770.1D2 |
| H165 | BnaC02g32680.1D2 | BnaA02g25820.1D2 |
| H165 | BnaC02g32690.1D2 | BnaA02g25830.1D2 |
| H165 | BnaC02g32830.1D2 | BnaA02g26740.1D2 |
| H165 | BnaC02g32840.1D2 | BnaA02g26730.1D2 |
| H165 | BnaC02g32850.1D2 | BnaA02g26710.1D2 |
| H165 | BnaC02g34510.1D2 | BnaA02g28130.1D2 |
| H165 | BnaC02g34850.1D2 | BnaA02g28220.1D2 |
| H165 | BnaC02g34860.1D2 | BnaA02g28230.1D2 |
| H165 | BnaC02g34870.1D2 | BnaA02g28240.1D2 |
| H165 | BnaC02g35240.1D2 | BnaA02g28610.1D2 |
| H165 | BnaC02g35250.1D2 | BnaA02g28620.1D2 |

|      |                  |                  |
|------|------------------|------------------|
| H165 | BnaC02g35260.1D2 | BnaA02g28630.1D2 |
| H165 | BnaC02g35390.1D2 | BnaA02g28820.1D2 |
| H165 | BnaC02g35490.1D2 | BnaA02g28950.1D2 |
| H165 | BnaC02g35520.1D2 | BnaA02g28980.1D2 |
| H165 | BnaC02g35640.1D2 | BnaA02g29090.1D2 |
| H165 | BnaC02g35650.1D2 | BnaA02g29110.1D2 |
| H165 | BnaC02g35660.1D2 | BnaA02g29120.1D2 |
| H165 | BnaC02g35710.1D2 | BnaA02g28000.1D2 |
| H165 | BnaC02g35810.1D2 | BnaA02g29220.1D2 |
| H165 | BnaC02g35840.1D2 | BnaA02g29230.1D2 |
| H165 | BnaC02g35850.1D2 | BnaA02g29240.1D2 |
| H165 | BnaC02g35910.1D2 | BnaA02g29300.1D2 |
| H165 | BnaC02g35920.1D2 | BnaA02g29310.1D2 |
| H165 | BnaC02g35930.1D2 | BnaA02g29320.1D2 |
| H165 | BnaC02g35950.1D2 | BnaA02g29340.1D2 |
| H165 | BnaC02g36100.1D2 | BnaA02g28380.1D2 |
| H165 | BnaC02g36440.1D2 | BnaA02g29640.1D2 |
| H165 | BnaC02g36470.1D2 | BnaA02g29670.1D2 |
| H165 | BnaC02g36510.1D2 | BnaA02g29690.1D2 |
| H165 | BnaC02g36610.1D2 | BnaA02g29760.1D2 |
| H165 | BnaC02g36620.1D2 | BnaA02g29770.1D2 |
| H165 | BnaC02g36870.1D2 | BnaA02g30080.1D2 |
| H165 | BnaC02g37000.1D2 | BnaA02g30230.1D2 |
| H165 | BnaC02g37010.1D2 | BnaA02g30230.1D2 |
| H165 | BnaC02g37020.1D2 | BnaA02g30240.1D2 |
| H165 | BnaC02g37060.1D2 | BnaA02g30290.1D2 |
| H165 | BnaC02g37160.1D2 | BnaA02g30350.1D2 |
| H165 | BnaC02g37210.1D2 | BnaA02g30440.1D2 |
| H165 | BnaC02g37270.1D2 | BnaA02g30500.1D2 |
| H165 | BnaC02g37300.1D2 | BnaA02g30520.1D2 |
| H165 | BnaC02g37310.1D2 | BnaA02g30530.1D2 |
| H165 | BnaC02g37360.1D2 | BnaA02g32250.1D2 |
| H165 | BnaC02g37420.1D2 | BnaA02g32200.1D2 |
| H165 | BnaC02g37440.1D2 | BnaA02g32190.1D2 |
| H165 | BnaC02g37460.1D2 | BnaA02g32180.1D2 |
| H165 | BnaC02g37470.1D2 | BnaA02g32170.1D2 |
| H165 | BnaC02g37500.1D2 | BnaA02g29390.1D2 |
| H165 | BnaC02g37710.1D2 | BnaA02g32160.1D2 |
| H165 | BnaC02g37720.1D2 | BnaA02g32150.1D2 |
| H165 | BnaC02g37750.1D2 | BnaA02g32140.1D2 |
| H165 | BnaC02g37880.1D2 | BnaA02g30680.1D2 |
| H165 | BnaC02g37900.1D2 | BnaA02g30700.1D2 |
| H165 | BnaC02g37950.1D2 | BnaA02g30750.1D2 |
| H165 | BnaC02g37960.1D2 | BnaA02g30760.1D2 |
| H165 | BnaC02g37980.1D2 | BnaA02g30780.1D2 |
| H165 | BnaC02g38000.1D2 | BnaA02g30790.1D2 |
| H165 | BnaC02g38040.1D2 | BnaA02g30840.1D2 |
| H165 | BnaC02g38100.1D2 | BnaA02g30940.1D2 |
| H165 | BnaC02g38180.1D2 | BnaA02g31000.1D2 |
| H165 | BnaC02g38320.1D2 | BnaA02g31160.1D2 |
| H165 | BnaC02g38690.1D2 | BnaA02g31630.1D2 |

|      |                  |                  |
|------|------------------|------------------|
| H165 | BnaC02g39280.1D2 | BnaA02g32300.1D2 |
| H165 | BnaC02g39370.1D2 | BnaA02g32110.1D2 |
| H165 | BnaC02g39580.1D2 | BnaA02g32680.1D2 |
| H165 | BnaC02g39590.1D2 | BnaA02g32670.1D2 |
| H165 | BnaC02g40200.1D2 | BnaA02g33440.1D2 |
| H165 | BnaC02g40230.1D2 | BnaA02g33460.1D2 |
| H165 | BnaC02g40510.1D2 | BnaA02g33740.1D2 |
| H165 | BnaC02g40550.1D2 | BnaA02g33770.1D2 |
| H165 | BnaC02g40550.1D2 | BnaA02g33780.1D2 |
| H165 | BnaC02g40560.1D2 | BnaA02g33790.1D2 |
| H165 | BnaC02g40810.1D2 | BnaA02g33960.1D2 |
| H165 | BnaC02g40820.1D2 | BnaA02g33970.1D2 |
| H165 | BnaC02g40910.1D2 | BnaA02g34120.1D2 |
| H165 | BnaC02g40920.1D2 | BnaA02g34130.1D2 |
| H165 | BnaC02g40940.1D2 | BnaA02g34150.1D2 |
| H165 | BnaC02g40970.1D2 | BnaA02g34180.1D2 |
| H165 | BnaC02g40990.1D2 | BnaA02g34190.1D2 |
| H165 | BnaC02g41120.1D2 | BnaA02g34290.1D2 |
| H165 | BnaC02g41220.1D2 | BnaA02g34400.1D2 |
| H165 | BnaC02g41400.1D2 | BnaA02g34510.1D2 |
| H165 | BnaC02g41440.1D2 | BnaA02g34880.1D2 |
| H165 | BnaC02g41770.1D2 | BnaA02g34570.1D2 |
| R53  | BnaC02g06110.1D2 | BnaA02g04040.1D2 |
| R53  | BnaC02g06150.1D2 | BnaA02g04000.1D2 |
| R53  | BnaC02g06190.1D2 | BnaA02g03950.1D2 |
| R53  | BnaC02g06200.1D2 | BnaA02g03940.1D2 |
| R53  | BnaC02g06220.1D2 | BnaA02g04220.1D2 |
| R53  | BnaC02g06260.1D2 | BnaA02g04290.1D2 |
| R53  | BnaC02g06280.1D2 | BnaA02g04310.1D2 |
| R53  | BnaC02g06300.1D2 | BnaA02g04170.1D2 |
| R53  | BnaC02g06330.1D2 | BnaA02g04060.1D2 |
| R53  | BnaC02g06400.1D2 | BnaA02g01080.1D2 |
| R53  | BnaC02g06440.1D2 | BnaA02g01120.1D2 |
| R53  | BnaC02g06440.1D2 | BnaA02g01140.1D2 |
| R53  | BnaC02g06450.1D2 | BnaA02g01150.1D2 |
| R53  | BnaC02g06470.1D2 | BnaA02g01190.1D2 |
| R53  | BnaC02g06530.1D2 | BnaA02g01250.1D2 |
| R53  | BnaC02g06550.1D2 | BnaA02g01270.1D2 |
| R53  | BnaC02g06560.1D2 | BnaA02g01290.1D2 |
| R53  | BnaC02g06570.1D2 | BnaA02g01300.1D2 |
| R53  | BnaC02g06580.1D2 | BnaA02g01300.1D2 |
| R53  | BnaC02g06590.1D2 | BnaA02g01300.1D2 |
| R53  | BnaC02g06640.1D2 | BnaA02g01350.1D2 |
| R53  | BnaC02g06650.1D2 | BnaA02g01360.1D2 |
| R53  | BnaC02g06780.1D2 | BnaA02g01490.1D2 |
| R53  | BnaC02g06790.1D2 | BnaA02g16940.1D2 |
| R53  | BnaC02g06810.1D2 | BnaA02g01510.1D2 |
| R53  | BnaC02g06830.1D2 | BnaA02g01530.1D2 |
| R53  | BnaC02g06850.1D2 | BnaA02g01550.1D2 |
| R53  | BnaC02g06850.1D2 | BnaA02g01560.1D2 |
| R53  | BnaC02g06870.1D2 | BnaA02g01570.1D2 |

|     |                  |                  |
|-----|------------------|------------------|
| R53 | BnaC02g06890.1D2 | BnaA02g01590.1D2 |
| R53 | BnaC02g06900.1D2 | BnaA02g01600.1D2 |
| R53 | BnaC02g06910.1D2 | BnaA02g01610.1D2 |
| R53 | BnaC02g06920.1D2 | BnaA02g01620.1D2 |
| R53 | BnaC02g06930.1D2 | BnaA02g01630.1D2 |
| R53 | BnaC02g06960.1D2 | BnaA02g01660.1D2 |
| R53 | BnaC02g06990.1D2 | BnaA02g01690.1D2 |
| R53 | BnaC02g07020.1D2 | BnaA02g01710.1D2 |
| R53 | BnaC02g07070.1D2 | BnaA02g01750.1D2 |
| R53 | BnaC02g07090.1D2 | BnaA02g01770.1D2 |
| R53 | BnaC02g07140.1D2 | BnaA02g01820.1D2 |
| R53 | BnaC02g07170.1D2 | BnaA02g01860.1D2 |
| R53 | BnaC02g07180.1D2 | BnaA02g01870.1D2 |
| R53 | BnaC02g07200.1D2 | BnaA02g01890.1D2 |
| R53 | BnaC02g07270.1D2 | BnaA02g01950.1D2 |
| R53 | BnaC02g07280.1D2 | BnaA02g01960.1D2 |
| R53 | BnaC02g07290.1D2 | BnaA02g01970.1D2 |
| R53 | BnaC02g07310.1D2 | BnaA02g01990.1D2 |
| R53 | BnaC02g07320.1D2 | BnaA02g02000.1D2 |
| R53 | BnaC02g07370.1D2 | BnaA02g02020.1D2 |
| R53 | BnaC02g07410.1D2 | BnaA02g02070.1D2 |
| R53 | BnaC02g07440.1D2 | BnaA02g02090.1D2 |
| R53 | BnaC02g07520.1D2 | BnaA02g02100.1D2 |
| R53 | BnaC02g07660.1D2 | BnaA02g02190.1D2 |
| R53 | BnaC02g07700.1D2 | BnaA02g02230.1D2 |
| R53 | BnaC02g07780.1D2 | BnaA02g02310.1D2 |
| R53 | BnaC02g07790.1D2 | BnaA02g02320.1D2 |
| R53 | BnaC02g07800.1D2 | BnaA02g02340.1D2 |
| R53 | BnaC02g07810.1D2 | BnaA02g02350.1D2 |
| R53 | BnaC02g07830.1D2 | BnaA02g02370.1D2 |
| R53 | BnaC02g07850.1D2 | BnaA02g02390.1D2 |
| R53 | BnaC02g07860.1D2 | BnaA02g02400.1D2 |
| R53 | BnaC02g07890.1D2 | BnaA02g02470.1D2 |
| R53 | BnaC02g07900.1D2 | BnaA02g02480.1D2 |
| R53 | BnaC02g07940.1D2 | BnaA02g02520.1D2 |
| R53 | BnaC02g07980.1D2 | BnaA02g02530.1D2 |
| R53 | BnaC02g08000.1D2 | BnaA02g02550.1D2 |
| R53 | BnaC02g08020.1D2 | BnaA02g02560.1D2 |
| R53 | BnaC02g08030.1D2 | BnaA02g02560.1D2 |
| R53 | BnaC02g08050.1D2 | BnaA02g02580.1D2 |
| R53 | BnaC02g08090.1D2 | BnaA02g02620.1D2 |
| R53 | BnaC02g08100.1D2 | BnaA02g02630.1D2 |
| R53 | BnaC02g08120.1D2 | BnaA02g02650.1D2 |
| R53 | BnaC02g08140.1D2 | BnaA02g02670.1D2 |
| R53 | BnaC02g08150.1D2 | BnaA02g02680.1D2 |
| R53 | BnaC02g08190.1D2 | BnaA02g02720.1D2 |
| R53 | BnaC02g08210.1D2 | BnaA02g02740.1D2 |
| R53 | BnaC02g08250.1D2 | BnaA02g02780.1D2 |
| R53 | BnaC02g08290.1D2 | BnaA02g02820.1D2 |
| R53 | BnaC02g08300.1D2 | BnaA02g02830.1D2 |
| R53 | BnaC02g08340.1D2 | BnaA02g02870.1D2 |

|     |                  |                  |
|-----|------------------|------------------|
| R53 | BnaC02g08370.1D2 | BnaA02g02900.1D2 |
| R53 | BnaC02g08380.1D2 | BnaA02g02910.1D2 |
| R53 | BnaC02g08390.1D2 | BnaA02g02920.1D2 |
| R53 | BnaC02g08490.1D2 | BnaA02g04250.1D2 |
| R53 | BnaC02g08530.1D2 | BnaA02g03920.1D2 |
| R53 | BnaC02g08560.1D2 | BnaA02g03930.1D2 |
| R53 | BnaC02g08580.1D2 | BnaA02g02990.1D2 |
| R53 | BnaC02g08600.1D2 | BnaA02g03020.1D2 |
| R53 | BnaC02g08620.1D2 | BnaA02g03040.1D2 |
| R53 | BnaC02g08630.1D2 | BnaA02g03050.1D2 |
| R53 | BnaC02g08650.1D2 | BnaA02g03070.1D2 |
| R53 | BnaC02g08680.1D2 | BnaA02g03090.1D2 |
| R53 | BnaC02g08810.1D2 | BnaA02g03220.1D2 |
| R53 | BnaC02g08830.1D2 | BnaA02g03240.1D2 |
| R53 | BnaC02g08850.1D2 | BnaA02g03260.1D2 |
| R53 | BnaC02g08860.1D2 | BnaA02g03270.1D2 |
| R53 | BnaC02g08880.1D2 | BnaA02g03290.1D2 |
| R53 | BnaC02g08890.1D2 | BnaA02g03300.1D2 |
| R53 | BnaC02g08900.1D2 | BnaA02g03310.1D2 |
| R53 | BnaC02g08950.1D2 | BnaA02g03350.1D2 |
| R53 | BnaC02g08960.1D2 | BnaA02g03360.1D2 |
| R53 | BnaC02g09010.1D2 | BnaA02g03380.1D2 |
| R53 | BnaC02g09040.1D2 | BnaA02g03380.1D2 |
| R53 | BnaC02g09050.1D2 | BnaA02g03390.1D2 |
| R53 | BnaC02g09090.1D2 | BnaA02g03430.1D2 |
| R53 | BnaC02g09110.1D2 | BnaA02g03450.1D2 |
| R53 | BnaC02g09130.1D2 | BnaA02g03460.1D2 |
| R53 | BnaC02g09150.1D2 | BnaA02g03480.1D2 |
| R53 | BnaC02g09160.1D2 | BnaA02g03490.1D2 |
| R53 | BnaC02g09170.1D2 | BnaA02g03500.1D2 |
| R53 | BnaC02g09220.1D2 | BnaA02g04420.1D2 |
| R53 | BnaC02g09260.1D2 | BnaA02g04460.1D2 |
| R53 | BnaC02g09310.1D2 | BnaA02g03630.1D2 |
| R53 | BnaC02g09420.1D2 | BnaA02g03690.1D2 |
| R53 | BnaC02g09430.1D2 | BnaA02g03700.1D2 |
| R53 | BnaC02g09450.1D2 | BnaA02g03720.1D2 |
| R53 | BnaC02g09470.1D2 | BnaA02g04790.1D2 |
| R53 | BnaC02g09480.1D2 | BnaA02g04800.1D2 |
| R53 | BnaC02g09500.1D2 | BnaA02g04790.1D2 |
| R53 | BnaC02g09510.1D2 | BnaA02g04790.1D2 |
| R53 | BnaC02g09530.1D2 | BnaA02g04810.1D2 |
| R53 | BnaC02g09550.1D2 | BnaA02g04800.1D2 |
| R53 | BnaC02g09570.1D2 | BnaA02g04830.1D2 |
| R53 | BnaC02g09650.1D2 | BnaA02g04910.1D2 |
| R53 | BnaC02g09710.1D2 | BnaA02g04940.1D2 |
| R53 | BnaC02g09730.1D2 | BnaA02g03910.1D2 |
| R53 | BnaC02g09860.1D2 | BnaA02g03780.1D2 |
| R53 | BnaC02g09900.1D2 | BnaA02g04970.1D2 |
| R53 | BnaC02g09960.1D2 | BnaA02g05020.1D2 |
| R53 | BnaC02g10010.1D2 | BnaA02g05060.1D2 |
| R53 | BnaC02g10050.1D2 | BnaA02g05100.1D2 |



|     |                  |                  |
|-----|------------------|------------------|
| R53 | BnaC02g10070.1D2 | BnaA02g05130.1D2 |
| R53 | BnaC02g10130.1D2 | BnaA02g05160.1D2 |
| R53 | BnaC02g10150.1D2 | BnaA02g05180.1D2 |
| R53 | BnaC02g10170.1D2 | BnaA02g05210.1D2 |
| R53 | BnaC02g10260.1D2 | BnaA02g05360.1D2 |
| R53 | BnaC02g10270.1D2 | BnaA02g05370.1D2 |
| R53 | BnaC02g10310.1D2 | BnaA02g05400.1D2 |
| R53 | BnaC02g10320.1D2 | BnaA02g05410.1D2 |
| R53 | BnaC02g10360.1D2 | BnaA02g05420.1D2 |
| R53 | BnaC02g10460.1D2 | BnaA02g05510.1D2 |
| R53 | BnaC02g10470.1D2 | BnaA02g05520.1D2 |
| R53 | BnaC02g10490.1D2 | BnaA02g05540.1D2 |
| R53 | BnaC02g10500.1D2 | BnaA02g05570.1D2 |
| R53 | BnaC02g10560.1D2 | BnaA02g05590.1D2 |
| R53 | BnaC02g10560.1D2 | BnaA02g05600.1D2 |
| R53 | BnaC02g10570.1D2 | BnaA02g05610.1D2 |
| R53 | BnaC02g10580.1D2 | BnaA02g05620.1D2 |
| R53 | BnaC02g10600.1D2 | BnaA02g05640.1D2 |
| R53 | BnaC02g10630.1D2 | BnaA02g05670.1D2 |
| R53 | BnaC02g10660.1D2 | BnaA02g05690.1D2 |
| R53 | BnaC02g10690.1D2 | BnaA02g05720.1D2 |
| R53 | BnaC02g10700.1D2 | BnaA02g05730.1D2 |
| R53 | BnaC02g10710.1D2 | BnaA02g05740.1D2 |
| R53 | BnaC02g10770.1D2 | BnaA02g06670.1D2 |
| R53 | BnaC02g10780.1D2 | BnaA02g06680.1D2 |
| R53 | BnaC02g10800.1D2 | BnaA02g06700.1D2 |
| R53 | BnaC02g10810.1D2 | BnaA02g06710.1D2 |
| R53 | BnaC02g10820.1D2 | BnaA02g06720.1D2 |
| R53 | BnaC02g10850.1D2 | BnaA02g06730.1D2 |
| R53 | BnaC02g10860.1D2 | BnaA02g06740.1D2 |
| R53 | BnaC02g10870.1D2 | BnaA02g06750.1D2 |
| R53 | BnaC02g10920.1D2 | BnaA02g06820.1D2 |
| R53 | BnaC02g10930.1D2 | BnaA02g06830.1D2 |
| R53 | BnaC02g10960.1D2 | BnaA02g04330.1D2 |
| R53 | BnaC02g11060.1D2 | BnaA02g07950.1D2 |
| R53 | BnaC02g11070.1D2 | BnaA02g07960.1D2 |
| R53 | BnaC02g11090.1D2 | BnaA02g07980.1D2 |
| R53 | BnaC02g11130.1D2 | BnaA02g08030.1D2 |
| R53 | BnaC02g11160.1D2 | BnaA02g08060.1D2 |
| R53 | BnaC02g11200.1D2 | BnaA02g08090.1D2 |
| R53 | BnaC02g11460.1D2 | BnaA02g08280.1D2 |
| R53 | BnaC02g11490.1D2 | BnaA02g08310.1D2 |
| R53 | BnaC02g11540.1D2 | BnaA02g08350.1D2 |
| R53 | BnaC02g11560.1D2 | BnaA02g08370.1D2 |
| R53 | BnaC02g11590.1D2 | BnaA02g08380.1D2 |
| R53 | BnaC02g11730.1D2 | BnaA02g08530.1D2 |
| R53 | BnaC02g11800.1D2 | BnaA02g08620.1D2 |
| R53 | BnaC02g11820.1D2 | BnaA02g08650.1D2 |
| R53 | BnaC02g11840.1D2 | BnaA02g08670.1D2 |
| R53 | BnaC02g11870.1D2 | BnaA02g08710.1D2 |
| R53 | BnaC02g11880.1D2 | BnaA02g08720.1D2 |

|     |                  |                  |
|-----|------------------|------------------|
| R53 | BnaC02g11930.1D2 | BnaA02g08770.1D2 |
| R53 | BnaC02g11970.1D2 | BnaA02g08790.1D2 |
| R53 | BnaC02g11990.1D2 | BnaA02g08810.1D2 |
| R53 | BnaC02g12070.1D2 | BnaA02g08890.1D2 |
| R53 | BnaC02g12080.1D2 | BnaA02g08900.1D2 |
| R53 | BnaC02g12100.1D2 | BnaA02g08920.1D2 |
| R53 | BnaC02g12120.1D2 | BnaA02g08940.1D2 |
| R53 | BnaC02g12250.1D2 | BnaA02g09110.1D2 |
| R53 | BnaC02g12270.1D2 | BnaA02g05320.1D2 |
| R53 | BnaC02g12290.1D2 | BnaA02g09120.1D2 |
| R53 | BnaC02g12440.1D2 | BnaA02g09300.1D2 |
| R53 | BnaC02g12450.1D2 | BnaA02g09310.1D2 |
| R53 | BnaC02g12480.1D2 | BnaA02g09340.1D2 |
| R53 | BnaC02g12530.1D2 | BnaA02g09380.1D2 |
| R53 | BnaC02g12590.1D2 | BnaA02g09420.1D2 |
| R53 | BnaC02g12750.1D2 | BnaA02g09520.1D2 |
| R53 | BnaC02g13100.1D2 | BnaA02g11230.1D2 |
| R53 | BnaC02g13280.1D2 | BnaA02g09890.1D2 |
| R53 | BnaC02g13300.1D2 | BnaA02g09910.1D2 |
| R53 | BnaC02g13580.1D2 | BnaA02g10110.1D2 |
| R53 | BnaC02g13610.1D2 | BnaA02g10140.1D2 |
| R53 | BnaC02g13630.1D2 | BnaA02g10160.1D2 |
| R53 | BnaC02g13650.1D2 | BnaA02g10180.1D2 |
| R53 | BnaC02g13810.1D2 | BnaA02g10510.1D2 |
| R53 | BnaC02g13820.1D2 | BnaA02g10520.1D2 |
| R53 | BnaC02g13870.1D2 | BnaA02g10560.1D2 |
| R53 | BnaC02g14260.1D2 | BnaA02g10640.1D2 |
| R53 | BnaC02g15160.1D2 | BnaA02g06910.1D2 |
| R53 | BnaC02g15180.1D2 | BnaA02g06890.1D2 |
| R53 | BnaC02g15330.1D2 | BnaA02g07010.1D2 |
| R53 | BnaC02g15360.1D2 | BnaA02g10710.1D2 |
| R53 | BnaC02g15460.1D2 | BnaA02g09670.1D2 |
| R53 | BnaC02g17080.1D2 | BnaA02g34760.1D2 |
| R53 | BnaC02g17100.1D2 | BnaA02g34780.1D2 |
| R53 | BnaC02g17120.1D2 | BnaA02g34780.1D2 |
| R53 | BnaC02g17290.1D2 | BnaA02g34650.1D2 |
| R53 | BnaC02g17320.1D2 | BnaA02g35280.1D2 |
| R53 | BnaC02g17380.1D2 | BnaA02g35260.1D2 |
| R53 | BnaC02g17390.1D2 | BnaA02g35250.1D2 |
| R53 | BnaC02g17450.1D2 | BnaA02g35210.1D2 |
| R53 | BnaC02g18540.1D2 | BnaA02g14380.1D2 |
| R53 | BnaC02g18550.1D2 | BnaA02g14380.1D2 |
| R53 | BnaC02g18610.1D2 | BnaA02g14450.1D2 |
| R53 | BnaC02g18640.1D2 | BnaA02g14480.1D2 |
| R53 | BnaC02g18690.1D2 | BnaA02g14590.1D2 |
| R53 | BnaC02g18870.1D2 | BnaA02g14820.1D2 |
| R53 | BnaC02g19030.1D2 | BnaA02g15670.1D2 |
| R53 | BnaC02g19040.1D2 | BnaA02g15660.1D2 |
| R53 | BnaC02g19200.1D2 | BnaA02g14980.1D2 |
| R53 | BnaC02g19210.1D2 | BnaA02g14990.1D2 |
| R53 | BnaC02g19220.1D2 | BnaA02g14990.1D2 |

|     |                  |                  |
|-----|------------------|------------------|
| R53 | BnaC02g19240.1D2 | BnaA02g15010.1D2 |
| R53 | BnaC02g19430.1D2 | BnaA02g15530.1D2 |
| R53 | BnaC02g19450.1D2 | BnaA02g14830.1D2 |
| R53 | BnaC02g19460.1D2 | BnaA02g14560.1D2 |
| R53 | BnaC02g19620.1D2 | BnaA02g15590.1D2 |
| R53 | BnaC02g19630.1D2 | BnaA02g15580.1D2 |
| R53 | BnaC02g19710.1D2 | BnaA02g14670.1D2 |
| R53 | BnaC02g19820.1D2 | BnaA02g14270.1D2 |
| R53 | BnaC02g19990.1D2 | BnaA02g15230.1D2 |
| R53 | BnaC02g20040.1D2 | BnaA02g15280.1D2 |
| R53 | BnaC02g20120.1D2 | BnaA02g15310.1D2 |
| R53 | BnaC02g20310.1D2 | BnaA02g15790.1D2 |
| R53 | BnaC02g20430.1D2 | BnaA02g15910.1D2 |
| R53 | BnaC02g20490.1D2 | BnaA02g15940.1D2 |
| R53 | BnaC02g20530.1D2 | BnaA02g15960.1D2 |
| R53 | BnaC02g20560.1D2 | BnaA02g15970.1D2 |
| R53 | BnaC02g20580.1D2 | BnaA02g15990.1D2 |
| R53 | BnaC02g20620.1D2 | BnaA02g16020.1D2 |
| R53 | BnaC02g20830.1D2 | BnaA02g16160.1D2 |
| R53 | BnaC02g20890.1D2 | BnaA02g16180.1D2 |
| R53 | BnaC02g20960.1D2 | BnaA02g16230.1D2 |
| R53 | BnaC02g20990.1D2 | BnaA02g16830.1D2 |
| R53 | BnaC02g21120.1D2 | BnaA02g16280.1D2 |
| R53 | BnaC02g21130.1D2 | BnaA02g16290.1D2 |
| R53 | BnaC02g21150.1D2 | BnaA02g16340.1D2 |
| R53 | BnaC02g21180.1D2 | BnaA02g16360.1D2 |
| R53 | BnaC02g21280.1D2 | BnaA02g16300.1D2 |
| R53 | BnaC02g21300.1D2 | BnaA02g16320.1D2 |
| R53 | BnaC02g21310.1D2 | BnaA02g15500.1D2 |
| R53 | BnaC02g21320.1D2 | BnaA02g15500.1D2 |
| R53 | BnaC02g21350.1D2 | BnaA02g15860.1D2 |
| R53 | BnaC02g21360.1D2 | BnaA02g15850.1D2 |
| R53 | BnaC02g21400.1D2 | BnaA02g15490.1D2 |
| R53 | BnaC02g21490.1D2 | BnaA02g16530.1D2 |
| R53 | BnaC02g21510.1D2 | BnaA02g16540.1D2 |
| R53 | BnaC02g21550.1D2 | BnaA02g16580.1D2 |
| R53 | BnaC02g21570.1D2 | BnaA02g16600.1D2 |
| R53 | BnaC02g21600.1D2 | BnaA02g16630.1D2 |
| R53 | BnaC02g21680.1D2 | BnaA02g17110.1D2 |
| R53 | BnaC02g21730.1D2 | BnaA02g16700.1D2 |
| R53 | BnaC02g21740.1D2 | BnaA02g16710.1D2 |
| R53 | BnaC02g21790.1D2 | BnaA02g16750.1D2 |
| R53 | BnaC02g21900.1D2 | BnaA02g17140.1D2 |
| R53 | BnaC02g22000.1D2 | BnaA02g17170.1D2 |
| R53 | BnaC02g22020.1D2 | BnaA02g17190.1D2 |
| R53 | BnaC02g22220.1D2 | BnaA02g20280.1D2 |
| R53 | BnaC02g22230.1D2 | BnaA02g20270.1D2 |
| R53 | BnaC02g22240.1D2 | BnaA02g20260.1D2 |
| R53 | BnaC02g22300.1D2 | BnaA02g17480.1D2 |
| R53 | BnaC02g22370.1D2 | BnaA02g17520.1D2 |
| R53 | BnaC02g22400.1D2 | BnaA02g17540.1D2 |

|     |                  |                  |
|-----|------------------|------------------|
| R53 | BnaC02g22470.1D2 | BnaA02g15870.1D2 |
| R53 | BnaC02g22490.1D2 | BnaA02g17330.1D2 |
| R53 | BnaC02g22540.1D2 | BnaA02g16800.1D2 |
| R53 | BnaC02g22670.1D2 | BnaA02g25790.1D2 |
| R53 | BnaC02g22690.1D2 | BnaA02g25800.1D2 |
| R53 | BnaC02g22720.1D2 | BnaA02g17370.1D2 |
| R53 | BnaC02g22750.1D2 | BnaA02g17340.1D2 |
| R53 | BnaC02g22820.1D2 | BnaA02g18030.1D2 |
| R53 | BnaC02g22830.1D2 | BnaA02g18020.1D2 |
| R53 | BnaC02g22840.1D2 | BnaA02g18010.1D2 |
| R53 | BnaC02g22870.1D2 | BnaA02g17990.1D2 |
| R53 | BnaC02g23030.1D2 | BnaA02g16780.1D2 |
| R53 | BnaC02g23080.1D2 | BnaA02g17070.1D2 |
| R53 | BnaC02g23110.1D2 | BnaA02g17100.1D2 |
| R53 | BnaC02g23200.1D2 | BnaA02g17680.1D2 |
| R53 | BnaC02g23250.1D2 | BnaA02g21200.1D2 |
| R53 | BnaC02g23260.1D2 | BnaA02g17750.1D2 |
| R53 | BnaC02g23270.1D2 | BnaA02g17760.1D2 |
| R53 | BnaC02g23310.1D2 | BnaA02g17790.1D2 |
| R53 | BnaC02g23340.1D2 | BnaA02g17810.1D2 |
| R53 | BnaC02g23390.1D2 | BnaA02g17830.1D2 |
| R53 | BnaC02g23440.1D2 | BnaA02g17870.1D2 |
| R53 | BnaC02g23600.1D2 | BnaA02g19420.1D2 |
| R53 | BnaC02g23610.1D2 | BnaA02g19400.1D2 |
| R53 | BnaC02g23620.1D2 | BnaA02g19390.1D2 |
| R53 | BnaC02g23750.1D2 | BnaA02g20780.1D2 |
| R53 | BnaC02g23820.1D2 | BnaA02g20840.1D2 |
| R53 | BnaC02g23840.1D2 | BnaA02g20860.1D2 |
| R53 | BnaC02g23850.1D2 | BnaA02g20870.1D2 |
| R53 | BnaC02g23860.1D2 | BnaA02g20880.1D2 |
| R53 | BnaC02g23870.1D2 | BnaA02g20890.1D2 |
| R53 | BnaC02g23930.1D2 | BnaA02g20980.1D2 |
| R53 | BnaC02g23940.1D2 | BnaA02g20990.1D2 |
| R53 | BnaC02g23960.1D2 | BnaA02g21010.1D2 |
| R53 | BnaC02g23980.1D2 | BnaA02g21030.1D2 |
| R53 | BnaC02g24000.1D2 | BnaA02g20340.1D2 |
| R53 | BnaC02g24080.1D2 | BnaA02g18670.1D2 |
| R53 | BnaC02g24140.1D2 | BnaA02g22040.1D2 |
| R53 | BnaC02g24150.1D2 | BnaA02g20320.1D2 |
| R53 | BnaC02g24170.1D2 | BnaA02g19240.1D2 |
| R53 | BnaC02g24180.1D2 | BnaA02g19230.1D2 |
| R53 | BnaC02g24210.1D2 | BnaA02g20060.1D2 |
| R53 | BnaC02g24290.1D2 | BnaA02g20570.1D2 |
| R53 | BnaC02g24320.1D2 | BnaA02g18460.1D2 |
| R53 | BnaC02g24340.1D2 | BnaA02g18430.1D2 |
| R53 | BnaC02g24360.1D2 | BnaA02g18410.1D2 |
| R53 | BnaC02g24370.1D2 | BnaA02g18400.1D2 |
| R53 | BnaC02g24390.1D2 | BnaA02g18380.1D2 |
| R53 | BnaC02g24410.1D2 | BnaA02g18370.1D2 |
| R53 | BnaC02g24430.1D2 | BnaA02g18340.1D2 |
| R53 | BnaC02g24440.1D2 | BnaA02g18340.1D2 |

|     |                  |                  |
|-----|------------------|------------------|
| R53 | BnaC02g24480.1D2 | BnaA02g18280.1D2 |
| R53 | BnaC02g24520.1D2 | BnaA02g18260.1D2 |
| R53 | BnaC02g24530.1D2 | BnaA02g18250.1D2 |
| R53 | BnaC02g24570.1D2 | BnaA02g18240.1D2 |
| R53 | BnaC02g24610.1D2 | BnaA02g18230.1D2 |
| R53 | BnaC02g24660.1D2 | BnaA02g18590.1D2 |
| R53 | BnaC02g24830.1D2 | BnaA02g18800.1D2 |
| R53 | BnaC02g24860.1D2 | BnaA02g18850.1D2 |
| R53 | BnaC02g24870.1D2 | BnaA02g18850.1D2 |
| R53 | BnaC02g24890.1D2 | BnaA02g18870.1D2 |
| R53 | BnaC02g24900.1D2 | BnaA02g18470.1D2 |
| R53 | BnaC02g24910.1D2 | BnaA02g18480.1D2 |
| R53 | BnaC02g24940.1D2 | BnaA02g18500.1D2 |
| R53 | BnaC02g24950.1D2 | BnaA02g18510.1D2 |
| R53 | BnaC02g24960.1D2 | BnaA02g18520.1D2 |
| R53 | BnaC02g25010.1D2 | BnaA02g18200.1D2 |
| R53 | BnaC02g25020.1D2 | BnaA02g18190.1D2 |
| R53 | BnaC02g25040.1D2 | BnaA02g18170.1D2 |
| R53 | BnaC02g25070.1D2 | BnaA02g18160.1D2 |
| R53 | BnaC02g25080.1D2 | BnaA02g18150.1D2 |
| R53 | BnaC02g25180.1D2 | BnaA02g20500.1D2 |
| R53 | BnaC02g25240.1D2 | BnaA02g19470.1D2 |
| R53 | BnaC02g25260.1D2 | BnaA02g19480.1D2 |
| R53 | BnaC02g25280.1D2 | BnaA02g19490.1D2 |
| R53 | BnaC02g25330.1D2 | BnaA02g19520.1D2 |
| R53 | BnaC02g25370.1D2 | BnaA02g19560.1D2 |
| R53 | BnaC02g25380.1D2 | BnaA02g19580.1D2 |
| R53 | BnaC02g25420.1D2 | BnaA02g19610.1D2 |
| R53 | BnaC02g25460.1D2 | BnaA02g19640.1D2 |
| R53 | BnaC02g25490.1D2 | BnaA02g19660.1D2 |
| R53 | BnaC02g25550.1D2 | BnaA02g19740.1D2 |
| R53 | BnaC02g25560.1D2 | BnaA02g19750.1D2 |
| R53 | BnaC02g25650.1D2 | BnaA02g19770.1D2 |
| R53 | BnaC02g25660.1D2 | BnaA02g19780.1D2 |
| R53 | BnaC02g25670.1D2 | BnaA02g19790.1D2 |
| R53 | BnaC02g25680.1D2 | BnaA02g19810.1D2 |
| R53 | BnaC02g25690.1D2 | BnaA02g19820.1D2 |
| R53 | BnaC02g25710.1D2 | BnaA02g19830.1D2 |
| R53 | BnaC02g25720.1D2 | BnaA02g19840.1D2 |
| R53 | BnaC02g25730.1D2 | BnaA02g19850.1D2 |
| R53 | BnaC02g25770.1D2 | BnaA02g20460.1D2 |
| R53 | BnaC02g25800.1D2 | BnaA02g19870.1D2 |
| R53 | BnaC02g25820.1D2 | BnaA02g19900.1D2 |
| R53 | BnaC02g25830.1D2 | BnaA02g19910.1D2 |
| R53 | BnaC02g25880.1D2 | BnaA02g21190.1D2 |
| R53 | BnaC02g25920.1D2 | BnaA02g19260.1D2 |
| R53 | BnaC02g26020.1D2 | BnaA02g20370.1D2 |
| R53 | BnaC02g26040.1D2 | BnaA02g20390.1D2 |
| R53 | BnaC02g26080.1D2 | BnaA02g20420.1D2 |
| R53 | BnaC02g26100.1D2 | BnaA02g20440.1D2 |
| R53 | BnaC02g26110.1D2 | BnaA02g17450.1D2 |

|     |                  |                  |
|-----|------------------|------------------|
| R53 | BnaC02g26250.1D2 | BnaA02g18930.1D2 |
| R53 | BnaC02g26260.1D2 | BnaA02g18940.1D2 |
| R53 | BnaC02g26320.1D2 | BnaA02g19130.1D2 |
| R53 | BnaC02g26330.1D2 | BnaA02g19120.1D2 |
| R53 | BnaC02g26340.1D2 | BnaA02g19110.1D2 |
| R53 | BnaC02g26350.1D2 | BnaA02g19090.1D2 |
| R53 | BnaC02g26380.1D2 | BnaA02g19080.1D2 |
| R53 | BnaC02g26400.1D2 | BnaA02g19060.1D2 |
| R53 | BnaC02g26410.1D2 | BnaA02g19050.1D2 |
| R53 | BnaC02g26470.1D2 | BnaA02g19030.1D2 |
| R53 | BnaC02g26520.1D2 | BnaA02g20640.1D2 |
| R53 | BnaC02g26540.1D2 | BnaA02g21910.1D2 |
| R53 | BnaC02g26550.1D2 | BnaA02g21940.1D2 |
| R53 | BnaC02g26570.1D2 | BnaA02g21950.1D2 |
| R53 | BnaC02g26620.1D2 | BnaA02g21890.1D2 |
| R53 | BnaC02g26630.1D2 | BnaA02g21880.1D2 |
| R53 | BnaC02g26810.1D2 | BnaA02g21740.1D2 |
| R53 | BnaC02g26860.1D2 | BnaA02g21690.1D2 |
| R53 | BnaC02g27070.1D2 | BnaA02g21640.1D2 |
| R53 | BnaC02g27100.1D2 | BnaA02g21660.1D2 |
| R53 | BnaC02g27170.1D2 | BnaA02g21480.1D2 |
| R53 | BnaC02g27220.1D2 | BnaA02g22260.1D2 |
| R53 | BnaC02g27270.1D2 | BnaA02g19950.1D2 |
| R53 | BnaC02g27340.1D2 | BnaA02g22320.1D2 |
| R53 | BnaC02g27460.1D2 | BnaA02g21320.1D2 |
| R53 | BnaC02g27490.1D2 | BnaA02g21330.1D2 |
| R53 | BnaC02g27610.1D2 | BnaA02g21400.1D2 |
| R53 | BnaC02g27620.1D2 | BnaA02g21410.1D2 |
| R53 | BnaC02g27630.1D2 | BnaA02g21420.1D2 |
| R53 | BnaC02g27640.1D2 | BnaA02g21430.1D2 |
| R53 | BnaC02g27670.1D2 | BnaA02g25770.1D2 |
| R53 | BnaC02g27690.1D2 | BnaA02g21460.1D2 |
| R53 | BnaC02g27720.1D2 | BnaA02g22240.1D2 |
| R53 | BnaC02g27730.1D2 | BnaA02g22250.1D2 |
| R53 | BnaC02g27780.1D2 | BnaA02g22050.1D2 |
| R53 | BnaC02g27880.1D2 | BnaA02g22150.1D2 |
| R53 | BnaC02g27960.1D2 | BnaA02g23830.1D2 |
| R53 | BnaC02g27970.1D2 | BnaA02g23840.1D2 |
| R53 | BnaC02g27980.1D2 | BnaA02g23850.1D2 |
| R53 | BnaC02g28010.1D2 | BnaA02g23860.1D2 |
| R53 | BnaC02g28010.1D2 | BnaA02g23870.1D2 |
| R53 | BnaC02g28020.1D2 | BnaA02g23880.1D2 |
| R53 | BnaC02g28050.1D2 | BnaA02g23900.1D2 |
| R53 | BnaC02g28080.1D2 | BnaA02g22750.1D2 |
| R53 | BnaC02g28130.1D2 | BnaA02g22800.1D2 |
| R53 | BnaC02g28150.1D2 | BnaA02g22810.1D2 |
| R53 | BnaC02g28230.1D2 | BnaA02g22850.1D2 |
| R53 | BnaC02g28240.1D2 | BnaA02g22860.1D2 |
| R53 | BnaC02g28250.1D2 | BnaA02g22890.1D2 |
| R53 | BnaC02g28280.1D2 | BnaA02g22910.1D2 |
| R53 | BnaC02g28290.1D2 | BnaA02g22920.1D2 |

|     |                  |                  |
|-----|------------------|------------------|
| R53 | BnaC02g28300.1D2 | BnaA02g22920.1D2 |
| R53 | BnaC02g28320.1D2 | BnaA02g22960.1D2 |
| R53 | BnaC02g28340.1D2 | BnaA02g23040.1D2 |
| R53 | BnaC02g28530.1D2 | BnaA02g23810.1D2 |
| R53 | BnaC02g28560.1D2 | BnaA02g23720.1D2 |
| R53 | BnaC02g28570.1D2 | BnaA02g23710.1D2 |
| R53 | BnaC02g28640.1D2 | BnaA02g23680.1D2 |
| R53 | BnaC02g28710.1D2 | BnaA02g23940.1D2 |
| R53 | BnaC02g28920.1D2 | BnaA02g23140.1D2 |
| R53 | BnaC02g28930.1D2 | BnaA02g23150.1D2 |
| R53 | BnaC02g29140.1D2 | BnaA02g23290.1D2 |
| R53 | BnaC02g29320.1D2 | BnaA02g23370.1D2 |
| R53 | BnaC02g29370.1D2 | BnaA02g23410.1D2 |
| R53 | BnaC02g29410.1D2 | BnaA02g23440.1D2 |
| R53 | BnaC02g29430.1D2 | BnaA02g23490.1D2 |
| R53 | BnaC02g29550.1D2 | BnaA02g23520.1D2 |
| R53 | BnaC02g29620.1D2 | BnaA02g23020.1D2 |
| R53 | BnaC02g29650.1D2 | BnaA02g23070.1D2 |
| R53 | BnaC02g29730.1D2 | BnaA02g24210.1D2 |
| R53 | BnaC02g29740.1D2 | BnaA02g22700.1D2 |
| R53 | BnaC02g29810.1D2 | BnaA02g24120.1D2 |
| R53 | BnaC02g29830.1D2 | BnaA02g24100.1D2 |
| R53 | BnaC02g29860.1D2 | BnaA02g24090.1D2 |
| R53 | BnaC02g29890.1D2 | BnaA02g20450.1D2 |
| R53 | BnaC02g30030.1D2 | BnaA02g24190.1D2 |
| R53 | BnaC02g30140.1D2 | BnaA02g23030.1D2 |
| R53 | BnaC02g30180.1D2 | BnaA02g24340.1D2 |
| R53 | BnaC02g30250.1D2 | BnaA02g22230.1D2 |
| R53 | BnaC02g30350.1D2 | BnaA02g24400.1D2 |
| R53 | BnaC02g30400.1D2 | BnaA02g24460.1D2 |
| R53 | BnaC02g30410.1D2 | BnaA02g24480.1D2 |
| R53 | BnaC02g30420.1D2 | BnaA02g24500.1D2 |
| R53 | BnaC02g30480.1D2 | BnaA02g24540.1D2 |
| R53 | BnaC02g30490.1D2 | BnaA02g24550.1D2 |
| R53 | BnaC02g30560.1D2 | BnaA02g24570.1D2 |
| R53 | BnaC02g30580.1D2 | BnaA02g24660.1D2 |
| R53 | BnaC02g30610.1D2 | BnaA02g24690.1D2 |
| R53 | BnaC02g30640.1D2 | BnaA02g24700.1D2 |
| R53 | BnaC02g30670.1D2 | BnaA02g24780.1D2 |
| R53 | BnaC02g30950.1D2 | BnaA02g25210.1D2 |
| R53 | BnaC02g31090.1D2 | BnaA02g21220.1D2 |
| R53 | BnaC02g31110.1D2 | BnaA02g21230.1D2 |
| R53 | BnaC02g31130.1D2 | BnaA02g21250.1D2 |
| R53 | BnaC02g31290.1D2 | BnaA02g22610.1D2 |
| R53 | BnaC02g31300.1D2 | BnaA02g22600.1D2 |
| R53 | BnaC02g31350.1D2 | BnaA02g22570.1D2 |
| R53 | BnaC02g31370.1D2 | BnaA02g26570.1D2 |
| R53 | BnaC02g31380.1D2 | BnaA02g25020.1D2 |
| R53 | BnaC02g31440.1D2 | BnaA02g24810.1D2 |
| R53 | BnaC02g31690.1D2 | BnaA02g24900.1D2 |
| R53 | BnaC02g31710.1D2 | BnaA02g24910.1D2 |

|     |                  |                  |
|-----|------------------|------------------|
| R53 | BnaC02g31820.1D2 | BnaA02g25000.1D2 |
| R53 | BnaC02g31860.1D2 | BnaA02g24640.1D2 |
| R53 | BnaC02g31910.1D2 | BnaA02g25140.1D2 |
| R53 | BnaC02g31930.1D2 | BnaA02g25170.1D2 |
| R53 | BnaC02g31940.1D2 | BnaA02g25180.1D2 |
| R53 | BnaC02g31950.1D2 | BnaA02g25190.1D2 |
| R53 | BnaC02g31970.1D2 | BnaA02g25200.1D2 |
| R53 | BnaC02g31990.1D2 | BnaA02g25220.1D2 |
| R53 | BnaC02g32010.1D2 | BnaA02g25240.1D2 |
| R53 | BnaC02g32020.1D2 | BnaA02g25260.1D2 |
| R53 | BnaC02g32030.1D2 | BnaA02g25270.1D2 |
| R53 | BnaC02g32070.1D2 | BnaA02g25580.1D2 |
| R53 | BnaC02g32100.1D2 | BnaA02g25610.1D2 |
| R53 | BnaC02g32110.1D2 | BnaA02g25620.1D2 |
| R53 | BnaC02g32140.1D2 | BnaA02g25650.1D2 |
| R53 | BnaC02g32150.1D2 | BnaA02g25660.1D2 |
| R53 | BnaC02g32240.1D2 | BnaA02g27030.1D2 |
| R53 | BnaC02g32280.1D2 | BnaA02g27000.1D2 |
| R53 | BnaC02g32310.1D2 | BnaA02g26970.1D2 |
| R53 | BnaC02g32320.1D2 | BnaA02g26970.1D2 |
| R53 | BnaC02g32330.1D2 | BnaA02g26960.1D2 |
| R53 | BnaC02g32360.1D2 | BnaA02g26940.1D2 |
| R53 | BnaC02g32380.1D2 | BnaA02g26920.1D2 |
| R53 | BnaC02g32390.1D2 | BnaA02g27170.1D2 |
| R53 | BnaC02g32400.1D2 | BnaA02g26910.1D2 |
| R53 | BnaC02g32430.1D2 | BnaA02g26900.1D2 |
| R53 | BnaC02g32450.1D2 | BnaA02g26880.1D2 |
| R53 | BnaC02g32460.1D2 | BnaA02g26870.1D2 |
| R53 | BnaC02g32470.1D2 | BnaA02g26860.1D2 |
| R53 | BnaC02g32480.1D2 | BnaA02g26850.1D2 |
| R53 | BnaC02g32490.1D2 | BnaA02g26840.1D2 |
| R53 | BnaC02g32510.1D2 | BnaA02g26830.1D2 |
| R53 | BnaC02g32550.1D2 | BnaA02g26810.1D2 |
| R53 | BnaC02g32560.1D2 | BnaA02g26800.1D2 |
| R53 | BnaC02g32590.1D2 | BnaA02g26780.1D2 |
| R53 | BnaC02g32600.1D2 | BnaA02g26770.1D2 |
| R53 | BnaC02g32610.1D2 | BnaA02g26790.1D2 |
| R53 | BnaC02g32680.1D2 | BnaA02g25820.1D2 |
| R53 | BnaC02g32690.1D2 | BnaA02g25830.1D2 |
| R53 | BnaC02g32730.1D2 | BnaA02g25860.1D2 |
| R53 | BnaC02g32750.1D2 | BnaA02g25880.1D2 |
| R53 | BnaC02g32830.1D2 | BnaA02g26740.1D2 |
| R53 | BnaC02g32840.1D2 | BnaA02g26730.1D2 |
| R53 | BnaC02g32850.1D2 | BnaA02g26710.1D2 |
| R53 | BnaC02g32880.1D2 | BnaA02g26700.1D2 |
| R53 | BnaC02g32930.1D2 | BnaA02g27810.1D2 |
| R53 | BnaC02g32970.1D2 | BnaA02g26010.1D2 |
| R53 | BnaC02g32990.1D2 | BnaA02g26050.1D2 |
| R53 | BnaC02g33180.1D2 | BnaA02g26180.1D2 |
| R53 | BnaC02g33190.1D2 | BnaA02g26190.1D2 |
| R53 | BnaC02g33200.1D2 | BnaA02g26200.1D2 |



|     |                  |                  |
|-----|------------------|------------------|
| R53 | BnaC02g33210.1D2 | BnaA02g26290.1D2 |
| R53 | BnaC02g33240.1D2 | BnaA02g26310.1D2 |
| R53 | BnaC02g33250.1D2 | BnaA02g26320.1D2 |
| R53 | BnaC02g33310.1D2 | BnaA02g26370.1D2 |
| R53 | BnaC02g33340.1D2 | BnaA02g25910.1D2 |
| R53 | BnaC02g33410.1D2 | BnaA02g26390.1D2 |
| R53 | BnaC02g33450.1D2 | BnaA02g26420.1D2 |
| R53 | BnaC02g33490.1D2 | BnaA02g26450.1D2 |
| R53 | BnaC02g33500.1D2 | BnaA02g27730.1D2 |
| R53 | BnaC02g33540.1D2 | BnaA02g26480.1D2 |
| R53 | BnaC02g33550.1D2 | BnaA02g26490.1D2 |
| R53 | BnaC02g33660.1D2 | BnaA02g26650.1D2 |
| R53 | BnaC02g33940.1D2 | BnaA02g27100.1D2 |
| R53 | BnaC02g33950.1D2 | BnaA02g27110.1D2 |
| R53 | BnaC02g34080.1D2 | BnaA02g27280.1D2 |
| R53 | BnaC02g34130.1D2 | BnaA02g27290.1D2 |
| R53 | BnaC02g34140.1D2 | BnaA02g27300.1D2 |
| R53 | BnaC02g34250.1D2 | BnaA02g27400.1D2 |
| R53 | BnaC02g34340.1D2 | BnaA02g27490.1D2 |
| R53 | BnaC02g34400.1D2 | BnaA02g27780.1D2 |
| R53 | BnaC02g34570.1D2 | BnaA02g27850.1D2 |
| R53 | BnaC02g34620.1D2 | BnaA02g27900.1D2 |
| R53 | BnaC02g34670.1D2 | BnaA02g28030.1D2 |
| R53 | BnaC02g34810.1D2 | BnaA02g28180.1D2 |
| R53 | BnaC02g34840.1D2 | BnaA02g28210.1D2 |
| R53 | BnaC02g34850.1D2 | BnaA02g28220.1D2 |
| R53 | BnaC02g34910.1D2 | BnaA02g28290.1D2 |
| R53 | BnaC02g35010.1D2 | BnaA02g27550.1D2 |
| R53 | BnaC02g35070.1D2 | BnaA02g28530.1D2 |
| R53 | BnaC02g35100.1D2 | BnaA02g28560.1D2 |
| R53 | BnaC02g35190.1D2 | BnaA02g27970.1D2 |
| R53 | BnaC02g35240.1D2 | BnaA02g28610.1D2 |
| R53 | BnaC02g35260.1D2 | BnaA02g28630.1D2 |
| R53 | BnaC02g35340.1D2 | BnaA02g28790.1D2 |
| R53 | BnaC02g35390.1D2 | BnaA02g28820.1D2 |
| R53 | BnaC02g35490.1D2 | BnaA02g28950.1D2 |
| R53 | BnaC02g35520.1D2 | BnaA02g28980.1D2 |
| R53 | BnaC02g35530.1D2 | BnaA02g28990.1D2 |
| R53 | BnaC02g35640.1D2 | BnaA02g29090.1D2 |
| R53 | BnaC02g35650.1D2 | BnaA02g29110.1D2 |
| R53 | BnaC02g35660.1D2 | BnaA02g29120.1D2 |
| R53 | BnaC02g35710.1D2 | BnaA02g28000.1D2 |
| R53 | BnaC02g35840.1D2 | BnaA02g29230.1D2 |
| R53 | BnaC02g35850.1D2 | BnaA02g29240.1D2 |
| R53 | BnaC02g35870.1D2 | BnaA02g29270.1D2 |
| R53 | BnaC02g35920.1D2 | BnaA02g29310.1D2 |
| R53 | BnaC02g35930.1D2 | BnaA02g29320.1D2 |
| R53 | BnaC02g35950.1D2 | BnaA02g29340.1D2 |
| R53 | BnaC02g35960.1D2 | BnaA02g29350.1D2 |
| R53 | BnaC02g35990.1D2 | BnaA02g29360.1D2 |
| R53 | BnaC02g36010.1D2 | BnaA02g29380.1D2 |

|     |                  |                  |
|-----|------------------|------------------|
| R53 | BnaC02g36070.1D2 | BnaA02g28350.1D2 |
| R53 | BnaC02g36120.1D2 | BnaA02g28400.1D2 |
| R53 | BnaC02g36210.1D2 | BnaA02g28500.1D2 |
| R53 | BnaC02g36450.1D2 | BnaA02g29650.1D2 |
| R53 | BnaC02g36470.1D2 | BnaA02g29670.1D2 |
| R53 | BnaC02g36510.1D2 | BnaA02g29690.1D2 |
| R53 | BnaC02g36570.1D2 | BnaA02g29730.1D2 |
| R53 | BnaC02g36580.1D2 | BnaA02g29740.1D2 |
| R53 | BnaC02g36840.1D2 | BnaA02g30050.1D2 |
| R53 | BnaC02g37500.1D2 | BnaA02g29390.1D2 |
| R53 | BnaC02g40230.1D2 | BnaA02g33460.1D2 |
| R53 | BnaC02g40560.1D2 | BnaA02g33790.1D2 |
| R53 | BnaC02g40630.1D2 | BnaA02g33830.1D2 |
| R53 | BnaC02g40800.1D2 | BnaA02g33950.1D2 |
| R53 | BnaC02g40810.1D2 | BnaA02g33960.1D2 |
| R53 | BnaC02g40820.1D2 | BnaA02g33970.1D2 |
| R53 | BnaC02g40910.1D2 | BnaA02g34120.1D2 |
| R53 | BnaC02g40940.1D2 | BnaA02g34150.1D2 |
| R53 | BnaC02g41060.1D2 | BnaA02g34240.1D2 |
| R53 | BnaC02g41270.1D2 | BnaA02g34110.1D2 |
| R53 | BnaC02g41400.1D2 | BnaA02g34510.1D2 |
| R53 | BnaC02g41450.1D2 | BnaA02g34890.1D2 |
| R53 | BnaC02g41470.1D2 | BnaA02g34910.1D2 |
| R53 | BnaC02g41550.1D2 | BnaA02g35000.1D2 |
| R53 | BnaC02g41560.1D2 | BnaA02g35010.1D2 |
| R53 | BnaC02g41580.1D2 | BnaA02g35040.1D2 |
| R53 | BnaC02g41600.1D2 | BnaA02g35060.1D2 |
| R53 | BnaC02g41620.1D2 | BnaA02g35080.1D2 |
| R53 | BnaC02g41630.1D2 | BnaA02g35090.1D2 |
| R53 | BnaC02g41750.1D2 | BnaA02g34600.1D2 |
| R53 | BnaC02g41770.1D2 | BnaA02g34570.1D2 |
| R53 | BnaC02g41790.1D2 | BnaA02g34550.1D2 |

#### List of HE genes (C03 to A03)

| <b>Accession</b> | <b>Lost gene</b> | <b>Duplicated HE gene</b> |
|------------------|------------------|---------------------------|
| Abukuma Natane   | BnaC03g00050.1D2 | BnaA03g00130.1D2          |
| Abukuma Natane   | BnaC03g00080.1D2 | BnaA03g00170.1D2          |
| Abukuma Natane   | BnaC03g00120.1D2 | BnaA03g00210.1D2          |
| Abukuma Natane   | BnaC03g00140.1D2 | BnaA03g00230.1D2          |
| Abukuma Natane   | BnaC03g00150.1D2 | BnaA03g00240.1D2          |
| Abukuma Natane   | BnaC03g00180.1D2 | BnaA03g00270.1D2          |
| Abukuma Natane   | BnaC03g00250.1D2 | BnaA03g00330.1D2          |
| Abukuma Natane   | BnaC03g00260.1D2 | BnaA03g00340.1D2          |
| Abukuma Natane   | BnaC03g00270.1D2 | BnaA03g00350.1D2          |
| Abukuma Natane   | BnaC03g00320.1D2 | BnaA03g00400.1D2          |
| Abukuma Natane   | BnaC03g00340.1D2 | BnaA03g00420.1D2          |
| Abukuma Natane   | BnaC03g00360.1D2 | BnaA03g00440.1D2          |
| Abukuma Natane   | BnaC03g00420.1D2 | BnaA03g00490.1D2          |
| Abukuma Natane   | BnaC03g00460.1D2 | BnaA03g02020.1D2          |
| Abukuma Natane   | BnaC03g00470.1D2 | BnaA03g02030.1D2          |
| Abukuma Natane   | BnaC03g00500.1D2 | BnaA03g02050.1D2          |

|                |                  |                  |
|----------------|------------------|------------------|
| Abukuma Natane | BnaC03g00520.1D2 | BnaA03g02070.1D2 |
| Abukuma Natane | BnaC03g00530.1D2 | BnaA03g02080.1D2 |
| Abukuma Natane | BnaC03g00540.1D2 | BnaA03g02090.1D2 |
| Abukuma Natane | BnaC03g00560.1D2 | BnaA03g02110.1D2 |
| Abukuma Natane | BnaC03g00580.1D2 | BnaA03g02250.1D2 |
| Abukuma Natane | BnaC03g00590.1D2 | BnaA03g02240.1D2 |
| Abukuma Natane | BnaC03g00610.1D2 | BnaA03g02220.1D2 |
| Abukuma Natane | BnaC03g00670.1D2 | BnaA03g02170.1D2 |
| Abukuma Natane | BnaC03g00710.1D2 | BnaA03g02140.1D2 |
| Abukuma Natane | BnaC03g00720.1D2 | BnaA03g02130.1D2 |
| Abukuma Natane | BnaC03g00740.1D2 | BnaA03g00540.1D2 |
| Abukuma Natane | BnaC03g00820.1D2 | BnaA03g00620.1D2 |
| Abukuma Natane | BnaC03g00830.1D2 | BnaA03g00630.1D2 |
| Abukuma Natane | BnaC03g00850.1D2 | BnaA03g00650.1D2 |
| Abukuma Natane | BnaC03g00890.1D2 | BnaA03g00680.1D2 |
| Abukuma Natane | BnaC03g00910.1D2 | BnaA03g00700.1D2 |
| Abukuma Natane | BnaC03g00920.1D2 | BnaA03g00710.1D2 |
| Abukuma Natane | BnaC03g00940.1D2 | BnaA03g00730.1D2 |
| Abukuma Natane | BnaC03g00960.1D2 | BnaA03g00750.1D2 |
| Abukuma Natane | BnaC03g00970.1D2 | BnaA03g00760.1D2 |
| Abukuma Natane | BnaC03g00990.1D2 | BnaA03g00780.1D2 |
| Abukuma Natane | BnaC03g01030.1D2 | BnaA03g00820.1D2 |
| Abukuma Natane | BnaC03g01040.1D2 | BnaA03g00830.1D2 |
| Abukuma Natane | BnaC03g01160.1D2 | BnaA03g00980.1D2 |
| Abukuma Natane | BnaC03g01230.1D2 | BnaA03g01050.1D2 |
| Abukuma Natane | BnaC03g01240.1D2 | BnaA03g01060.1D2 |
| Abukuma Natane | BnaC03g01250.1D2 | BnaA03g01070.1D2 |
| Abukuma Natane | BnaC03g01260.1D2 | BnaA03g01080.1D2 |
| Abukuma Natane | BnaC03g01270.1D2 | BnaA03g01090.1D2 |
| Abukuma Natane | BnaC03g01320.1D2 | BnaA03g01190.1D2 |
| Abukuma Natane | BnaC03g01340.1D2 | BnaA03g01200.1D2 |
| Abukuma Natane | BnaC03g01360.1D2 | BnaA03g01220.1D2 |
| Abukuma Natane | BnaC03g01410.1D2 | BnaA03g01290.1D2 |
| Abukuma Natane | BnaC03g01420.1D2 | BnaA03g01300.1D2 |
| Abukuma Natane | BnaC03g01430.1D2 | BnaA03g01310.1D2 |
| Abukuma Natane | BnaC03g01450.1D2 | BnaA03g01330.1D2 |
| Abukuma Natane | BnaC03g01460.1D2 | BnaA03g01340.1D2 |
| Abukuma Natane | BnaC03g01470.1D2 | BnaA03g01350.1D2 |
| Abukuma Natane | BnaC03g01480.1D2 | BnaA03g01360.1D2 |
| Abukuma Natane | BnaC03g01490.1D2 | BnaA03g01370.1D2 |
| Abukuma Natane | BnaC03g01530.1D2 | BnaA03g01410.1D2 |
| Abukuma Natane | BnaC03g01540.1D2 | BnaA03g01420.1D2 |
| Abukuma Natane | BnaC03g01570.1D2 | BnaA03g01440.1D2 |
| Abukuma Natane | BnaC03g01610.1D2 | BnaA03g01470.1D2 |
| Abukuma Natane | BnaC03g01630.1D2 | BnaA03g07590.1D2 |
| Abukuma Natane | BnaC03g01640.1D2 | BnaA03g07600.1D2 |
| Abukuma Natane | BnaC03g01670.1D2 | BnaA03g07630.1D2 |
| Abukuma Natane | BnaC03g01790.1D2 | BnaA03g07730.1D2 |
| Abukuma Natane | BnaC03g01820.1D2 | BnaA03g02290.1D2 |
| Abukuma Natane | BnaC03g01840.1D2 | BnaA03g01490.1D2 |
| Abukuma Natane | BnaC03g01920.1D2 | BnaA03g01570.1D2 |

|                |                  |                  |
|----------------|------------------|------------------|
| Abukuma Natane | BnaC03g01950.1D2 | BnaA03g01600.1D2 |
| Abukuma Natane | BnaC03g02010.1D2 | BnaA03g01640.1D2 |
| Abukuma Natane | BnaC03g02030.1D2 | BnaA03g01670.1D2 |
| Abukuma Natane | BnaC03g02030.1D2 | BnaA03g01690.1D2 |
| Abukuma Natane | BnaC03g02040.1D2 | BnaA03g01670.1D2 |
| Abukuma Natane | BnaC03g02040.1D2 | BnaA03g01690.1D2 |
| Abukuma Natane | BnaC03g02050.1D2 | BnaA03g01710.1D2 |
| Abukuma Natane | BnaC03g02070.1D2 | BnaA03g01710.1D2 |
| Abukuma Natane | BnaC03g02090.1D2 | BnaA03g01730.1D2 |
| Abukuma Natane | BnaC03g02180.1D2 | BnaA03g01780.1D2 |
| Abukuma Natane | BnaC03g02190.1D2 | BnaA03g01790.1D2 |
| Abukuma Natane | BnaC03g02200.1D2 | BnaA03g01800.1D2 |
| Abukuma Natane | BnaC03g02220.1D2 | BnaA03g01810.1D2 |
| Abukuma Natane | BnaC03g02240.1D2 | BnaA03g01840.1D2 |
| Abukuma Natane | BnaC03g02270.1D2 | BnaA03g01860.1D2 |
| Abukuma Natane | BnaC03g02300.1D2 | BnaA03g01890.1D2 |
| Abukuma Natane | BnaC03g02300.1D2 | BnaA03g01910.1D2 |
| Abukuma Natane | BnaC03g02380.1D2 | BnaA03g07570.1D2 |
| Abukuma Natane | BnaC03g02400.1D2 | BnaA03g07560.1D2 |
| Abukuma Natane | BnaC03g02430.1D2 | BnaA03g07480.1D2 |
| Abukuma Natane | BnaC03g02510.1D2 | BnaA03g02530.1D2 |
| Abukuma Natane | BnaC03g02520.1D2 | BnaA03g02540.1D2 |
| Abukuma Natane | BnaC03g02530.1D2 | BnaA03g02550.1D2 |
| Abukuma Natane | BnaC03g02540.1D2 | BnaA03g02560.1D2 |
| Abukuma Natane | BnaC03g02550.1D2 | BnaA03g02570.1D2 |
| Abukuma Natane | BnaC03g02590.1D2 | BnaA03g02590.1D2 |
| Abukuma Natane | BnaC03g02600.1D2 | BnaA03g02600.1D2 |
| Abukuma Natane | BnaC03g02610.1D2 | BnaA03g02600.1D2 |
| Abukuma Natane | BnaC03g02650.1D2 | BnaA03g02610.1D2 |
| Abukuma Natane | BnaC03g02650.1D2 | BnaA03g02620.1D2 |
| Abukuma Natane | BnaC03g02680.1D2 | BnaA03g02660.1D2 |
| Abukuma Natane | BnaC03g02700.1D2 | BnaA03g02690.1D2 |
| Abukuma Natane | BnaC03g02780.1D2 | BnaA03g02780.1D2 |
| Abukuma Natane | BnaC03g02840.1D2 | BnaA03g02840.1D2 |
| Abukuma Natane | BnaC03g02850.1D2 | BnaA03g02850.1D2 |
| Abukuma Natane | BnaC03g02860.1D2 | BnaA03g02860.1D2 |
| Abukuma Natane | BnaC03g02880.1D2 | BnaA03g02880.1D2 |
| Abukuma Natane | BnaC03g02890.1D2 | BnaA03g02890.1D2 |
| Abukuma Natane | BnaC03g02920.1D2 | BnaA03g02940.1D2 |
| Abukuma Natane | BnaC03g02930.1D2 | BnaA03g02950.1D2 |
| Abukuma Natane | BnaC03g02990.1D2 | BnaA03g03020.1D2 |
| Abukuma Natane | BnaC03g03010.1D2 | BnaA03g03040.1D2 |
| Abukuma Natane | BnaC03g03020.1D2 | BnaA03g03050.1D2 |
| Abukuma Natane | BnaC03g03030.1D2 | BnaA03g03060.1D2 |
| Abukuma Natane | BnaC03g03050.1D2 | BnaA03g07820.1D2 |
| Abukuma Natane | BnaC03g03080.1D2 | BnaA03g07290.1D2 |
| Abukuma Natane | BnaC03g03120.1D2 | BnaA03g07330.1D2 |
| Abukuma Natane | BnaC03g03130.1D2 | BnaA03g07340.1D2 |
| Abukuma Natane | BnaC03g03150.1D2 | BnaA03g07360.1D2 |
| Abukuma Natane | BnaC03g03180.1D2 | BnaA03g03120.1D2 |
| Abukuma Natane | BnaC03g03210.1D2 | BnaA03g03150.1D2 |

|                |                  |                  |
|----------------|------------------|------------------|
| Abukuma Natane | BnaC03g03230.1D2 | BnaA03g03160.1D2 |
| Abukuma Natane | BnaC03g03250.1D2 | BnaA03g03180.1D2 |
| Abukuma Natane | BnaC03g03270.1D2 | BnaA03g03220.1D2 |
| Abukuma Natane | BnaC03g03270.1D2 | BnaA03g03230.1D2 |
| Abukuma Natane | BnaC03g03280.1D2 | BnaA03g03220.1D2 |
| Abukuma Natane | BnaC03g03280.1D2 | BnaA03g03230.1D2 |
| Abukuma Natane | BnaC03g03290.1D2 | BnaA03g03240.1D2 |
| Abukuma Natane | BnaC03g03300.1D2 | BnaA03g03250.1D2 |
| Abukuma Natane | BnaC03g03320.1D2 | BnaA03g03270.1D2 |
| Abukuma Natane | BnaC03g03330.1D2 | BnaA03g03280.1D2 |
| Abukuma Natane | BnaC03g03350.1D2 | BnaA03g03300.1D2 |
| Abukuma Natane | BnaC03g03400.1D2 | BnaA03g07260.1D2 |
| Abukuma Natane | BnaC03g03410.1D2 | BnaA03g07250.1D2 |
| Abukuma Natane | BnaC03g03420.1D2 | BnaA03g07240.1D2 |
| Abukuma Natane | BnaC03g03440.1D2 | BnaA03g07220.1D2 |
| Abukuma Natane | BnaC03g03470.1D2 | BnaA03g07200.1D2 |
| Abukuma Natane | BnaC03g03500.1D2 | BnaA03g07180.1D2 |
| Abukuma Natane | BnaC03g03510.1D2 | BnaA03g07170.1D2 |
| Abukuma Natane | BnaC03g03570.1D2 | BnaA03g03320.1D2 |
| Abukuma Natane | BnaC03g03590.1D2 | BnaA03g03370.1D2 |
| Abukuma Natane | BnaC03g03620.1D2 | BnaA03g03390.1D2 |
| Abukuma Natane | BnaC03g03630.1D2 | BnaA03g03400.1D2 |
| Abukuma Natane | BnaC03g03690.1D2 | BnaA03g03430.1D2 |
| Abukuma Natane | BnaC03g03710.1D2 | BnaA03g03450.1D2 |
| Abukuma Natane | BnaC03g03730.1D2 | BnaA03g03470.1D2 |
| Abukuma Natane | BnaC03g03740.1D2 | BnaA03g03480.1D2 |
| Abukuma Natane | BnaC03g03750.1D2 | BnaA03g03490.1D2 |
| Abukuma Natane | BnaC03g03760.1D2 | BnaA03g03500.1D2 |
| Abukuma Natane | BnaC03g03800.1D2 | BnaA03g03530.1D2 |
| Abukuma Natane | BnaC03g03820.1D2 | BnaA03g03550.1D2 |
| Abukuma Natane | BnaC03g03890.1D2 | BnaA03g01140.1D2 |
| Abukuma Natane | BnaC03g03900.1D2 | BnaA03g01150.1D2 |
| Abukuma Natane | BnaC03g03920.1D2 | BnaA03g01170.1D2 |
| Abukuma Natane | BnaC03g03970.1D2 | BnaA03g03620.1D2 |
| Abukuma Natane | BnaC03g04050.1D2 | BnaA03g03670.1D2 |
| Abukuma Natane | BnaC03g04060.1D2 | BnaA03g03680.1D2 |
| Abukuma Natane | BnaC03g04080.1D2 | BnaA03g03700.1D2 |
| Abukuma Natane | BnaC03g04100.1D2 | BnaA03g03720.1D2 |
| Abukuma Natane | BnaC03g04130.1D2 | BnaA03g03740.1D2 |
| Abukuma Natane | BnaC03g04130.1D2 | BnaA03g03750.1D2 |
| Abukuma Natane | BnaC03g04140.1D2 | BnaA03g03760.1D2 |
| Abukuma Natane | BnaC03g04160.1D2 | BnaA03g03800.1D2 |
| Abukuma Natane | BnaC03g04170.1D2 | BnaA03g03490.1D2 |
| Abukuma Natane | BnaC03g04170.1D2 | BnaA03g03790.1D2 |
| Abukuma Natane | BnaC03g04180.1D2 | BnaA03g03780.1D2 |
| Abukuma Natane | BnaC03g04210.1D2 | BnaA03g03830.1D2 |
| Abukuma Natane | BnaC03g04220.1D2 | BnaA03g03840.1D2 |
| Abukuma Natane | BnaC03g04240.1D2 | BnaA03g03870.1D2 |
| Abukuma Natane | BnaC03g04390.1D2 | BnaA03g03970.1D2 |
| Abukuma Natane | BnaC03g04420.1D2 | BnaA03g04000.1D2 |
| Abukuma Natane | BnaC03g04460.1D2 | BnaA03g04020.1D2 |

|                |                  |                  |
|----------------|------------------|------------------|
| Abukuma Natane | BnaC03g04500.1D2 | BnaA03g04050.1D2 |
| Abukuma Natane | BnaC03g04530.1D2 | BnaA03g04080.1D2 |
| Abukuma Natane | BnaC03g04560.1D2 | BnaA03g04100.1D2 |
| Abukuma Natane | BnaC03g04570.1D2 | BnaA03g04110.1D2 |
| Abukuma Natane | BnaC03g04580.1D2 | BnaA03g04120.1D2 |
| Abukuma Natane | BnaC03g04600.1D2 | BnaA03g04130.1D2 |
| Abukuma Natane | BnaC03g04610.1D2 | BnaA03g04140.1D2 |
| Abukuma Natane | BnaC03g04620.1D2 | BnaA03g04150.1D2 |
| Abukuma Natane | BnaC03g04630.1D2 | BnaA03g04160.1D2 |
| Abukuma Natane | BnaC03g04660.1D2 | BnaA03g04200.1D2 |
| Abukuma Natane | BnaC03g04670.1D2 | BnaA03g04210.1D2 |
| Abukuma Natane | BnaC03g04710.1D2 | BnaA03g04250.1D2 |
| Abukuma Natane | BnaC03g04730.1D2 | BnaA03g04270.1D2 |
| Abukuma Natane | BnaC03g04780.1D2 | BnaA03g04320.1D2 |
| Abukuma Natane | BnaC03g04800.1D2 | BnaA03g04330.1D2 |
| Abukuma Natane | BnaC03g04820.1D2 | BnaA03g04350.1D2 |
| Abukuma Natane | BnaC03g04830.1D2 | BnaA03g04360.1D2 |
| Abukuma Natane | BnaC03g04900.1D2 | BnaA03g04400.1D2 |
| Abukuma Natane | BnaC03g04950.1D2 | BnaA03g04450.1D2 |
| Abukuma Natane | BnaC03g04990.1D2 | BnaA03g04450.1D2 |
| Abukuma Natane | BnaC03g05070.1D2 | BnaA03g04540.1D2 |
| Abukuma Natane | BnaC03g05100.1D2 | BnaA03g04580.1D2 |
| Abukuma Natane | BnaC03g05150.1D2 | BnaA03g04620.1D2 |
| Abukuma Natane | BnaC03g05180.1D2 | BnaA03g04650.1D2 |
| Abukuma Natane | BnaC03g05190.1D2 | BnaA03g04660.1D2 |
| Abukuma Natane | BnaC03g05210.1D2 | BnaA03g04680.1D2 |
| Abukuma Natane | BnaC03g05220.1D2 | BnaA03g04690.1D2 |
| Abukuma Natane | BnaC03g05260.1D2 | BnaA03g04790.1D2 |
| Abukuma Natane | BnaC03g05290.1D2 | BnaA03g04820.1D2 |
| Abukuma Natane | BnaC03g05320.1D2 | BnaA03g04850.1D2 |
| Abukuma Natane | BnaC03g05420.1D2 | BnaA03g04920.1D2 |
| Abukuma Natane | BnaC03g05430.1D2 | BnaA03g04930.1D2 |
| Abukuma Natane | BnaC03g05440.1D2 | BnaA03g04940.1D2 |
| Abukuma Natane | BnaC03g05470.1D2 | BnaA03g04970.1D2 |
| Abukuma Natane | BnaC03g05510.1D2 | BnaA03g05010.1D2 |
| Abukuma Natane | BnaC03g05520.1D2 | BnaA03g05020.1D2 |
| Abukuma Natane | BnaC03g05530.1D2 | BnaA03g05030.1D2 |
| Abukuma Natane | BnaC03g05600.1D2 | BnaA03g05090.1D2 |
| Abukuma Natane | BnaC03g05620.1D2 | BnaA03g05110.1D2 |
| Abukuma Natane | BnaC03g05640.1D2 | BnaA03g05120.1D2 |
| Abukuma Natane | BnaC03g05650.1D2 | BnaA03g05130.1D2 |
| Abukuma Natane | BnaC03g05660.1D2 | BnaA03g05140.1D2 |
| Abukuma Natane | BnaC03g05680.1D2 | BnaA03g05160.1D2 |
| Abukuma Natane | BnaC03g05700.1D2 | BnaA03g05190.1D2 |
| Abukuma Natane | BnaC03g05840.1D2 | BnaA03g05300.1D2 |
| Abukuma Natane | BnaC03g05890.1D2 | BnaA03g05340.1D2 |
| Abukuma Natane | BnaC03g05990.1D2 | BnaA03g05450.1D2 |
| Abukuma Natane | BnaC03g06050.1D2 | BnaA03g05550.1D2 |
| Abukuma Natane | BnaC03g06130.1D2 | BnaA03g05610.1D2 |
| Abukuma Natane | BnaC03g06210.1D2 | BnaA03g05680.1D2 |
| Abukuma Natane | BnaC03g10890.1D2 | BnaA03g04760.1D2 |

|                |                  |                  |
|----------------|------------------|------------------|
| Abukuma Natane | BnaC03g10900.1D2 | BnaA03g04750.1D2 |
| Abukuma Natane | BnaC03g10930.1D2 | BnaA03g04730.1D2 |
| Abukuma Natane | BnaC03g10940.1D2 | BnaA03g04720.1D2 |
| Abukuma Natane | BnaC03g10970.1D2 | BnaA03g04700.1D2 |
| Abukuma Natane | BnaC03g11290.1D2 | BnaA03g10670.1D2 |
| Abukuma Natane | BnaC03g11320.1D2 | BnaA03g10540.1D2 |
| Abukuma Natane | BnaC03g11350.1D2 | BnaA03g10570.1D2 |
| Abukuma Natane | BnaC03g11360.1D2 | BnaA03g10580.1D2 |
| Abukuma Natane | BnaC03g11370.1D2 | BnaA03g10590.1D2 |
| Abukuma Natane | BnaC03g11490.1D2 | BnaA03g10720.1D2 |
| Abukuma Natane | BnaC03g11520.1D2 | BnaA03g10750.1D2 |
| Evvin          | BnaC03g00120.1D2 | BnaA03g00210.1D2 |
| Evvin          | BnaC03g00140.1D2 | BnaA03g00230.1D2 |
| Evvin          | BnaC03g00150.1D2 | BnaA03g00240.1D2 |
| Evvin          | BnaC03g00160.1D2 | BnaA03g00250.1D2 |
| Evvin          | BnaC03g00270.1D2 | BnaA03g00350.1D2 |
| Evvin          | BnaC03g00280.1D2 | BnaA03g00360.1D2 |
| Evvin          | BnaC03g00320.1D2 | BnaA03g00400.1D2 |
| Evvin          | BnaC03g00330.1D2 | BnaA03g00410.1D2 |
| Evvin          | BnaC03g00360.1D2 | BnaA03g00440.1D2 |
| Evvin          | BnaC03g00420.1D2 | BnaA03g00490.1D2 |
| Evvin          | BnaC03g00450.1D2 | BnaA03g02010.1D2 |
| Evvin          | BnaC03g00470.1D2 | BnaA03g02030.1D2 |
| Evvin          | BnaC03g00500.1D2 | BnaA03g02050.1D2 |
| Evvin          | BnaC03g00520.1D2 | BnaA03g02070.1D2 |
| Evvin          | BnaC03g00530.1D2 | BnaA03g02080.1D2 |
| Evvin          | BnaC03g00540.1D2 | BnaA03g02090.1D2 |
| Evvin          | BnaC03g00560.1D2 | BnaA03g02110.1D2 |
| Evvin          | BnaC03g00580.1D2 | BnaA03g02250.1D2 |
| Evvin          | BnaC03g00610.1D2 | BnaA03g02220.1D2 |
| Evvin          | BnaC03g00670.1D2 | BnaA03g02170.1D2 |
| Evvin          | BnaC03g00710.1D2 | BnaA03g02140.1D2 |
| Evvin          | BnaC03g00720.1D2 | BnaA03g02130.1D2 |
| Evvin          | BnaC03g00740.1D2 | BnaA03g00540.1D2 |
| Evvin          | BnaC03g00820.1D2 | BnaA03g00620.1D2 |
| Evvin          | BnaC03g00850.1D2 | BnaA03g00650.1D2 |
| Evvin          | BnaC03g00960.1D2 | BnaA03g00750.1D2 |
| Evvin          | BnaC03g01060.1D2 | BnaA03g00850.1D2 |
| Evvin          | BnaC03g01160.1D2 | BnaA03g00980.1D2 |
| Evvin          | BnaC03g01170.1D2 | BnaA03g00990.1D2 |
| Evvin          | BnaC03g01220.1D2 | BnaA03g01040.1D2 |
| Evvin          | BnaC03g01230.1D2 | BnaA03g01050.1D2 |
| Evvin          | BnaC03g01240.1D2 | BnaA03g01060.1D2 |
| Evvin          | BnaC03g01260.1D2 | BnaA03g01080.1D2 |
| Evvin          | BnaC03g01360.1D2 | BnaA03g01220.1D2 |
| Evvin          | BnaC03g01410.1D2 | BnaA03g01290.1D2 |
| Evvin          | BnaC03g01420.1D2 | BnaA03g01300.1D2 |
| Evvin          | BnaC03g01430.1D2 | BnaA03g01310.1D2 |
| Evvin          | BnaC03g01450.1D2 | BnaA03g01330.1D2 |
| Evvin          | BnaC03g01460.1D2 | BnaA03g01340.1D2 |
| Evvin          | BnaC03g01470.1D2 | BnaA03g01350.1D2 |

|        |                  |                  |
|--------|------------------|------------------|
| Evvin  | BnaC03g01480.1D2 | BnaA03g01360.1D2 |
| Evvin  | BnaC03g01490.1D2 | BnaA03g01370.1D2 |
| Evvin  | BnaC03g01540.1D2 | BnaA03g01420.1D2 |
| Evvin  | BnaC03g01820.1D2 | BnaA03g02290.1D2 |
| Evvin  | BnaC03g02010.1D2 | BnaA03g01640.1D2 |
| Evvin  | BnaC03g02190.1D2 | BnaA03g01790.1D2 |
| Evvin  | BnaC03g02240.1D2 | BnaA03g01840.1D2 |
| Evvin  | BnaC03g02300.1D2 | BnaA03g01890.1D2 |
| Evvin  | BnaC03g02300.1D2 | BnaA03g01910.1D2 |
| Evvin  | BnaC03g02400.1D2 | BnaA03g07560.1D2 |
| Evvin  | BnaC03g02430.1D2 | BnaA03g07480.1D2 |
| Evvin  | BnaC03g02600.1D2 | BnaA03g02600.1D2 |
| Evvin  | BnaC03g02610.1D2 | BnaA03g02600.1D2 |
| Evvin  | BnaC03g02860.1D2 | BnaA03g02860.1D2 |
| Evvin  | BnaC03g02880.1D2 | BnaA03g02880.1D2 |
| Evvin  | BnaC03g02920.1D2 | BnaA03g02940.1D2 |
| Evvin  | BnaC03g03080.1D2 | BnaA03g07290.1D2 |
| Evvin  | BnaC03g03110.1D2 | BnaA03g07320.1D2 |
| Evvin  | BnaC03g03300.1D2 | BnaA03g03250.1D2 |
| Evvin  | BnaC03g03320.1D2 | BnaA03g03270.1D2 |
| Evvin  | BnaC03g03330.1D2 | BnaA03g03280.1D2 |
| Evvin  | BnaC03g03340.1D2 | BnaA03g03290.1D2 |
| Evvin  | BnaC03g03350.1D2 | BnaA03g03300.1D2 |
| Evvin  | BnaC03g03420.1D2 | BnaA03g07240.1D2 |
| Evvin  | BnaC03g03440.1D2 | BnaA03g07220.1D2 |
| Evvin  | BnaC03g03510.1D2 | BnaA03g07170.1D2 |
| Evvin  | BnaC03g03630.1D2 | BnaA03g03400.1D2 |
| Evvin  | BnaC03g03690.1D2 | BnaA03g03430.1D2 |
| Evvin  | BnaC03g03900.1D2 | BnaA03g01150.1D2 |
| Evvin  | BnaC03g03920.1D2 | BnaA03g01170.1D2 |
| Evvin  | BnaC03g04170.1D2 | BnaA03g03490.1D2 |
| Evvin  | BnaC03g04170.1D2 | BnaA03g03790.1D2 |
| Evvin  | BnaC03g04210.1D2 | BnaA03g03830.1D2 |
| Evvin  | BnaC03g04240.1D2 | BnaA03g03870.1D2 |
| Evvin  | BnaC03g04460.1D2 | BnaA03g04020.1D2 |
| Evvin  | BnaC03g04530.1D2 | BnaA03g04080.1D2 |
| Evvin  | BnaC03g04560.1D2 | BnaA03g04100.1D2 |
| Evvin  | BnaC03g04570.1D2 | BnaA03g04110.1D2 |
| Evvin  | BnaC03g04580.1D2 | BnaA03g04120.1D2 |
| Evvin  | BnaC03g04610.1D2 | BnaA03g04140.1D2 |
| Evvin  | BnaC03g04660.1D2 | BnaA03g04200.1D2 |
| Evvin  | BnaC03g04710.1D2 | BnaA03g04250.1D2 |
| Evvin  | BnaC03g04730.1D2 | BnaA03g04270.1D2 |
| Evvin  | BnaC03g04780.1D2 | BnaA03g04320.1D2 |
| Evvin  | BnaC03g04990.1D2 | BnaA03g04450.1D2 |
| Evvin  | BnaC03g05100.1D2 | BnaA03g04580.1D2 |
| Evvin  | BnaC03g05180.1D2 | BnaA03g04650.1D2 |
| Evvin  | BnaC03g20320.1D2 | BnaA03g18360.1D2 |
| Expert | BnaC03g00050.1D2 | BnaA03g00130.1D2 |
| Expert | BnaC03g00080.1D2 | BnaA03g00170.1D2 |
| Expert | BnaC03g00120.1D2 | BnaA03g00210.1D2 |



|        |                  |                  |
|--------|------------------|------------------|
| Expert | BnaC03g00140.1D2 | BnaA03g00230.1D2 |
| Expert | BnaC03g00150.1D2 | BnaA03g00240.1D2 |
| Expert | BnaC03g00160.1D2 | BnaA03g00250.1D2 |
| Expert | BnaC03g00180.1D2 | BnaA03g00270.1D2 |
| Expert | BnaC03g00250.1D2 | BnaA03g00330.1D2 |
| Expert | BnaC03g00260.1D2 | BnaA03g00340.1D2 |
| Expert | BnaC03g00270.1D2 | BnaA03g00350.1D2 |
| Expert | BnaC03g00280.1D2 | BnaA03g00360.1D2 |
| Expert | BnaC03g00320.1D2 | BnaA03g00400.1D2 |
| Expert | BnaC03g00330.1D2 | BnaA03g00410.1D2 |
| Expert | BnaC03g00340.1D2 | BnaA03g00420.1D2 |
| Expert | BnaC03g00360.1D2 | BnaA03g00440.1D2 |
| Expert | BnaC03g00420.1D2 | BnaA03g00490.1D2 |
| Expert | BnaC03g00450.1D2 | BnaA03g02010.1D2 |
| Expert | BnaC03g00460.1D2 | BnaA03g02020.1D2 |
| Expert | BnaC03g00470.1D2 | BnaA03g02030.1D2 |
| Expert | BnaC03g00500.1D2 | BnaA03g02050.1D2 |
| Expert | BnaC03g00520.1D2 | BnaA03g02070.1D2 |
| Expert | BnaC03g00530.1D2 | BnaA03g02080.1D2 |
| Expert | BnaC03g00540.1D2 | BnaA03g02090.1D2 |
| Expert | BnaC03g00560.1D2 | BnaA03g02110.1D2 |
| Expert | BnaC03g00580.1D2 | BnaA03g02250.1D2 |
| Expert | BnaC03g00610.1D2 | BnaA03g02220.1D2 |
| Expert | BnaC03g00670.1D2 | BnaA03g02170.1D2 |
| Expert | BnaC03g00710.1D2 | BnaA03g02140.1D2 |
| Expert | BnaC03g00720.1D2 | BnaA03g02130.1D2 |
| Expert | BnaC03g00740.1D2 | BnaA03g00540.1D2 |
| Expert | BnaC03g00820.1D2 | BnaA03g00620.1D2 |
| Expert | BnaC03g00850.1D2 | BnaA03g00650.1D2 |
| Expert | BnaC03g00890.1D2 | BnaA03g00680.1D2 |
| Expert | BnaC03g00910.1D2 | BnaA03g00700.1D2 |
| Expert | BnaC03g00920.1D2 | BnaA03g00710.1D2 |
| Expert | BnaC03g00940.1D2 | BnaA03g00730.1D2 |
| Expert | BnaC03g00960.1D2 | BnaA03g00750.1D2 |
| Expert | BnaC03g00970.1D2 | BnaA03g00760.1D2 |
| Expert | BnaC03g00990.1D2 | BnaA03g00780.1D2 |
| Expert | BnaC03g01020.1D2 | BnaA03g00810.1D2 |
| Expert | BnaC03g01030.1D2 | BnaA03g00820.1D2 |
| Expert | BnaC03g01040.1D2 | BnaA03g00830.1D2 |
| Expert | BnaC03g01050.1D2 | BnaA03g00840.1D2 |
| Expert | BnaC03g01070.1D2 | BnaA03g00860.1D2 |
| Expert | BnaC03g01160.1D2 | BnaA03g00980.1D2 |
| Expert | BnaC03g01220.1D2 | BnaA03g01040.1D2 |
| Expert | BnaC03g01230.1D2 | BnaA03g01050.1D2 |
| Expert | BnaC03g01240.1D2 | BnaA03g01060.1D2 |
| Expert | BnaC03g01260.1D2 | BnaA03g01080.1D2 |
| Expert | BnaC03g01270.1D2 | BnaA03g01090.1D2 |
| Expert | BnaC03g01320.1D2 | BnaA03g01190.1D2 |
| Expert | BnaC03g01340.1D2 | BnaA03g01200.1D2 |
| Expert | BnaC03g01360.1D2 | BnaA03g01220.1D2 |
| Expert | BnaC03g01410.1D2 | BnaA03g01290.1D2 |

|        |                  |                  |
|--------|------------------|------------------|
| Expert | BnaC03g01420.1D2 | BnaA03g01300.1D2 |
| Expert | BnaC03g01430.1D2 | BnaA03g01310.1D2 |
| Expert | BnaC03g01450.1D2 | BnaA03g01330.1D2 |
| Expert | BnaC03g01460.1D2 | BnaA03g01340.1D2 |
| Expert | BnaC03g01470.1D2 | BnaA03g01350.1D2 |
| Expert | BnaC03g01480.1D2 | BnaA03g01360.1D2 |
| Expert | BnaC03g01490.1D2 | BnaA03g01370.1D2 |
| Expert | BnaC03g01530.1D2 | BnaA03g01410.1D2 |
| Expert | BnaC03g01540.1D2 | BnaA03g01420.1D2 |
| Expert | BnaC03g01570.1D2 | BnaA03g01440.1D2 |
| Expert | BnaC03g01580.1D2 | BnaA03g01450.1D2 |
| Expert | BnaC03g01610.1D2 | BnaA03g01470.1D2 |
| Expert | BnaC03g01640.1D2 | BnaA03g07600.1D2 |
| Expert | BnaC03g01670.1D2 | BnaA03g07630.1D2 |
| Expert | BnaC03g01680.1D2 | BnaA03g07650.1D2 |
| Expert | BnaC03g01790.1D2 | BnaA03g07730.1D2 |
| Expert | BnaC03g01820.1D2 | BnaA03g02290.1D2 |
| Expert | BnaC03g01840.1D2 | BnaA03g01490.1D2 |
| Expert | BnaC03g01860.1D2 | BnaA03g01530.1D2 |
| Expert | BnaC03g01900.1D2 | BnaA03g01550.1D2 |
| Expert | BnaC03g01920.1D2 | BnaA03g01570.1D2 |
| Expert | BnaC03g01950.1D2 | BnaA03g01600.1D2 |
| Expert | BnaC03g02010.1D2 | BnaA03g01640.1D2 |
| Expert | BnaC03g02030.1D2 | BnaA03g01670.1D2 |
| Expert | BnaC03g02030.1D2 | BnaA03g01690.1D2 |
| Expert | BnaC03g02040.1D2 | BnaA03g01670.1D2 |
| Expert | BnaC03g02040.1D2 | BnaA03g01690.1D2 |
| Expert | BnaC03g02050.1D2 | BnaA03g01710.1D2 |
| Expert | BnaC03g02070.1D2 | BnaA03g01710.1D2 |
| Expert | BnaC03g02090.1D2 | BnaA03g01730.1D2 |
| Expert | BnaC03g02180.1D2 | BnaA03g01780.1D2 |
| Expert | BnaC03g02200.1D2 | BnaA03g01800.1D2 |
| Expert | BnaC03g02220.1D2 | BnaA03g01810.1D2 |
| Expert | BnaC03g02240.1D2 | BnaA03g01840.1D2 |
| Expert | BnaC03g02270.1D2 | BnaA03g01860.1D2 |
| Expert | BnaC03g02300.1D2 | BnaA03g01890.1D2 |
| Expert | BnaC03g02300.1D2 | BnaA03g01910.1D2 |
| Expert | BnaC03g03890.1D2 | BnaA03g01140.1D2 |
| H149   | BnaC03g00050.1D2 | BnaA03g00130.1D2 |
| H149   | BnaC03g00080.1D2 | BnaA03g00170.1D2 |
| H149   | BnaC03g00120.1D2 | BnaA03g00210.1D2 |
| H149   | BnaC03g00140.1D2 | BnaA03g00230.1D2 |
| H149   | BnaC03g00150.1D2 | BnaA03g00240.1D2 |
| H149   | BnaC03g00160.1D2 | BnaA03g00250.1D2 |
| H149   | BnaC03g00180.1D2 | BnaA03g00270.1D2 |
| H149   | BnaC03g00250.1D2 | BnaA03g00330.1D2 |
| H149   | BnaC03g00260.1D2 | BnaA03g00340.1D2 |
| H149   | BnaC03g00270.1D2 | BnaA03g00350.1D2 |
| H149   | BnaC03g00320.1D2 | BnaA03g00400.1D2 |
| H149   | BnaC03g00360.1D2 | BnaA03g00440.1D2 |
| H149   | BnaC03g00450.1D2 | BnaA03g02010.1D2 |

|      |                  |                  |
|------|------------------|------------------|
| H149 | BnaC03g00460.1D2 | BnaA03g02020.1D2 |
| H149 | BnaC03g00470.1D2 | BnaA03g02030.1D2 |
| H149 | BnaC03g00500.1D2 | BnaA03g02050.1D2 |
| H149 | BnaC03g00540.1D2 | BnaA03g02090.1D2 |
| H149 | BnaC03g00560.1D2 | BnaA03g02110.1D2 |
| H149 | BnaC03g00580.1D2 | BnaA03g02250.1D2 |
| H149 | BnaC03g00610.1D2 | BnaA03g02220.1D2 |
| H149 | BnaC03g00710.1D2 | BnaA03g02140.1D2 |
| H149 | BnaC03g00720.1D2 | BnaA03g02130.1D2 |
| H149 | BnaC03g00740.1D2 | BnaA03g00540.1D2 |
| H149 | BnaC03g00820.1D2 | BnaA03g00620.1D2 |
| H149 | BnaC03g00890.1D2 | BnaA03g00680.1D2 |
| H149 | BnaC03g00910.1D2 | BnaA03g00700.1D2 |
| H149 | BnaC03g00920.1D2 | BnaA03g00710.1D2 |
| H149 | BnaC03g00940.1D2 | BnaA03g00730.1D2 |
| H149 | BnaC03g00970.1D2 | BnaA03g00760.1D2 |
| H149 | BnaC03g00990.1D2 | BnaA03g00780.1D2 |
| H149 | BnaC03g01030.1D2 | BnaA03g00820.1D2 |
| H149 | BnaC03g01050.1D2 | BnaA03g00840.1D2 |
| H149 | BnaC03g01160.1D2 | BnaA03g00980.1D2 |
| H149 | BnaC03g01230.1D2 | BnaA03g01050.1D2 |
| H149 | BnaC03g01240.1D2 | BnaA03g01060.1D2 |
| H149 | BnaC03g01250.1D2 | BnaA03g01070.1D2 |
| H149 | BnaC03g01260.1D2 | BnaA03g01080.1D2 |
| H149 | BnaC03g01320.1D2 | BnaA03g01190.1D2 |
| H149 | BnaC03g01340.1D2 | BnaA03g01200.1D2 |
| H149 | BnaC03g01360.1D2 | BnaA03g01220.1D2 |
| H149 | BnaC03g01410.1D2 | BnaA03g01290.1D2 |
| H149 | BnaC03g01420.1D2 | BnaA03g01300.1D2 |
| H149 | BnaC03g01430.1D2 | BnaA03g01310.1D2 |
| H149 | BnaC03g01450.1D2 | BnaA03g01330.1D2 |
| H149 | BnaC03g01460.1D2 | BnaA03g01340.1D2 |
| H149 | BnaC03g01470.1D2 | BnaA03g01350.1D2 |
| H149 | BnaC03g01480.1D2 | BnaA03g01360.1D2 |
| H149 | BnaC03g01490.1D2 | BnaA03g01370.1D2 |
| H149 | BnaC03g01540.1D2 | BnaA03g01420.1D2 |
| H149 | BnaC03g01580.1D2 | BnaA03g01450.1D2 |
| H149 | BnaC03g01590.1D2 | BnaA03g01450.1D2 |
| H149 | BnaC03g01610.1D2 | BnaA03g01470.1D2 |
| H149 | BnaC03g01640.1D2 | BnaA03g07600.1D2 |
| H149 | BnaC03g01670.1D2 | BnaA03g07630.1D2 |
| H149 | BnaC03g01680.1D2 | BnaA03g07650.1D2 |
| H149 | BnaC03g01790.1D2 | BnaA03g07730.1D2 |
| H149 | BnaC03g01820.1D2 | BnaA03g02290.1D2 |
| H149 | BnaC03g01840.1D2 | BnaA03g01490.1D2 |
| H149 | BnaC03g01900.1D2 | BnaA03g01550.1D2 |
| H149 | BnaC03g01950.1D2 | BnaA03g01600.1D2 |
| H149 | BnaC03g02010.1D2 | BnaA03g01640.1D2 |
| H149 | BnaC03g02030.1D2 | BnaA03g01670.1D2 |
| H149 | BnaC03g02030.1D2 | BnaA03g01690.1D2 |
| H149 | BnaC03g02040.1D2 | BnaA03g01670.1D2 |

|      |                  |                  |
|------|------------------|------------------|
| H149 | BnaC03g02040.1D2 | BnaA03g01690.1D2 |
| H149 | BnaC03g02070.1D2 | BnaA03g01710.1D2 |
| H149 | BnaC03g02090.1D2 | BnaA03g01730.1D2 |
| H149 | BnaC03g02180.1D2 | BnaA03g01780.1D2 |
| H149 | BnaC03g02190.1D2 | BnaA03g01790.1D2 |
| H149 | BnaC03g02200.1D2 | BnaA03g01800.1D2 |
| H149 | BnaC03g02240.1D2 | BnaA03g01840.1D2 |
| H149 | BnaC03g02270.1D2 | BnaA03g01860.1D2 |
| H149 | BnaC03g02290.1D2 | BnaA03g01880.1D2 |
| H149 | BnaC03g02300.1D2 | BnaA03g01890.1D2 |
| H149 | BnaC03g02300.1D2 | BnaA03g01910.1D2 |
| H149 | BnaC03g02380.1D2 | BnaA03g07570.1D2 |
| H149 | BnaC03g02400.1D2 | BnaA03g07560.1D2 |
| H149 | BnaC03g02430.1D2 | BnaA03g07480.1D2 |
| H149 | BnaC03g02520.1D2 | BnaA03g02540.1D2 |
| H149 | BnaC03g02530.1D2 | BnaA03g02550.1D2 |
| H149 | BnaC03g02540.1D2 | BnaA03g02560.1D2 |
| H149 | BnaC03g02550.1D2 | BnaA03g02570.1D2 |
| H149 | BnaC03g02590.1D2 | BnaA03g02590.1D2 |
| H149 | BnaC03g02610.1D2 | BnaA03g02600.1D2 |
| H149 | BnaC03g02650.1D2 | BnaA03g02610.1D2 |
| H149 | BnaC03g02650.1D2 | BnaA03g02620.1D2 |
| H149 | BnaC03g02680.1D2 | BnaA03g02660.1D2 |
| H149 | BnaC03g02700.1D2 | BnaA03g02690.1D2 |
| H149 | BnaC03g02840.1D2 | BnaA03g02840.1D2 |
| H149 | BnaC03g02850.1D2 | BnaA03g02850.1D2 |
| H149 | BnaC03g02860.1D2 | BnaA03g02860.1D2 |
| H149 | BnaC03g02890.1D2 | BnaA03g02890.1D2 |
| H149 | BnaC03g02920.1D2 | BnaA03g02940.1D2 |
| H149 | BnaC03g02990.1D2 | BnaA03g03020.1D2 |
| H149 | BnaC03g03890.1D2 | BnaA03g01140.1D2 |
| H149 | BnaC03g03900.1D2 | BnaA03g01150.1D2 |
| H149 | BnaC03g03920.1D2 | BnaA03g01170.1D2 |
| H44  | BnaC03g04080.1D2 | BnaA03g03700.1D2 |
| H44  | BnaC03g04140.1D2 | BnaA03g03760.1D2 |
| H44  | BnaC03g04160.1D2 | BnaA03g03800.1D2 |
| H44  | BnaC03g04170.1D2 | BnaA03g03790.1D2 |
| H44  | BnaC03g04180.1D2 | BnaA03g03780.1D2 |
| H44  | BnaC03g04210.1D2 | BnaA03g03830.1D2 |
| H44  | BnaC03g04240.1D2 | BnaA03g03870.1D2 |
| H44  | BnaC03g04530.1D2 | BnaA03g04080.1D2 |
| H44  | BnaC03g04610.1D2 | BnaA03g04140.1D2 |
| H44  | BnaC03g04710.1D2 | BnaA03g04250.1D2 |
| H44  | BnaC03g04730.1D2 | BnaA03g04270.1D2 |
| H44  | BnaC03g04760.1D2 | BnaA03g04300.1D2 |
| H44  | BnaC03g04900.1D2 | BnaA03g04400.1D2 |
| H44  | BnaC03g04950.1D2 | BnaA03g04450.1D2 |
| H44  | BnaC03g04990.1D2 | BnaA03g04450.1D2 |
| H44  | BnaC03g05100.1D2 | BnaA03g04580.1D2 |
| H44  | BnaC03g05430.1D2 | BnaA03g04930.1D2 |
| H44  | BnaC03g05520.1D2 | BnaA03g05020.1D2 |

|        |                  |                  |
|--------|------------------|------------------|
| H44    | BnaC03g05700.1D2 | BnaA03g05190.1D2 |
| H44    | BnaC03g05760.1D2 | BnaA03g05240.1D2 |
| H44    | BnaC03g05840.1D2 | BnaA03g05300.1D2 |
| H44    | BnaC03g05950.1D2 | BnaA03g05410.1D2 |
| H44    | BnaC03g05960.1D2 | BnaA03g05420.1D2 |
| H44    | BnaC03g06130.1D2 | BnaA03g05610.1D2 |
| H44    | BnaC03g06180.1D2 | BnaA03g05660.1D2 |
| H44    | BnaC03g06200.1D2 | BnaA03g05670.1D2 |
| H44    | BnaC03g06380.1D2 | BnaA03g05780.1D2 |
| H44    | BnaC03g06500.1D2 | BnaA03g05880.1D2 |
| H44    | BnaC03g06560.1D2 | BnaA03g05910.1D2 |
| H44    | BnaC03g06600.1D2 | BnaA03g06030.1D2 |
| H44    | BnaC03g06620.1D2 | BnaA03g05920.1D2 |
| H44    | BnaC03g06630.1D2 | BnaA03g05920.1D2 |
| H44    | BnaC03g06640.1D2 | BnaA03g05940.1D2 |
| H44    | BnaC03g06650.1D2 | BnaA03g05950.1D2 |
| H44    | BnaC03g06700.1D2 | BnaA03g06050.1D2 |
| H44    | BnaC03g06720.1D2 | BnaA03g06070.1D2 |
| H44    | BnaC03g06790.1D2 | BnaA03g06130.1D2 |
| H44    | BnaC03g06800.1D2 | BnaA03g06130.1D2 |
| H44    | BnaC03g06880.1D2 | BnaA03g06210.1D2 |
| H44    | BnaC03g06900.1D2 | BnaA03g06230.1D2 |
| H44    | BnaC03g06960.1D2 | BnaA03g06300.1D2 |
| H44    | BnaC03g07010.1D2 | BnaA03g06370.1D2 |
| H44    | BnaC03g07120.1D2 | BnaA03g06460.1D2 |
| H44    | BnaC03g07170.1D2 | BnaA03g06520.1D2 |
| H44    | BnaC03g07520.1D2 | BnaA03g06800.1D2 |
| H44    | BnaC03g07530.1D2 | BnaA03g06810.1D2 |
| H44    | BnaC03g07550.1D2 | BnaA03g06830.1D2 |
| H44    | BnaC03g07610.1D2 | BnaA03g06890.1D2 |
| H44    | BnaC03g07720.1D2 | BnaA03g06970.1D2 |
| H44    | BnaC03g07780.1D2 | BnaA03g07050.1D2 |
| H44    | BnaC03g07820.1D2 | BnaA03g08030.1D2 |
| H44    | BnaC03g07870.1D2 | BnaA03g08080.1D2 |
| H44    | BnaC03g08020.1D2 | BnaA03g08230.1D2 |
| H44    | BnaC03g08050.1D2 | BnaA03g08250.1D2 |
| H44    | BnaC03g10900.1D2 | BnaA03g04750.1D2 |
| H44    | BnaC03g10930.1D2 | BnaA03g04730.1D2 |
| H44    | BnaC03g10940.1D2 | BnaA03g04720.1D2 |
| H44    | BnaC03g19230.1D2 | BnaA03g18320.1D2 |
| H44    | BnaC03g20320.1D2 | BnaA03g18360.1D2 |
| H44    | BnaC03g23460.1D2 | BnaA03g20970.1D2 |
| H44    | BnaC03g46790.1D2 | BnaA03g20750.1D2 |
| Pirola | BnaC03g00050.1D2 | BnaA03g00130.1D2 |
| Pirola | BnaC03g00080.1D2 | BnaA03g00170.1D2 |
| Pirola | BnaC03g00120.1D2 | BnaA03g00210.1D2 |
| Pirola | BnaC03g00140.1D2 | BnaA03g00230.1D2 |
| Pirola | BnaC03g00150.1D2 | BnaA03g00240.1D2 |
| Pirola | BnaC03g00160.1D2 | BnaA03g00250.1D2 |
| Pirola | BnaC03g00180.1D2 | BnaA03g00270.1D2 |
| Pirola | BnaC03g00250.1D2 | BnaA03g00330.1D2 |

|        |                  |                  |
|--------|------------------|------------------|
| Pirola | BnaC03g00260.1D2 | BnaA03g00340.1D2 |
| Pirola | BnaC03g00270.1D2 | BnaA03g00350.1D2 |
| Pirola | BnaC03g00280.1D2 | BnaA03g00360.1D2 |
| Pirola | BnaC03g00320.1D2 | BnaA03g00400.1D2 |
| Pirola | BnaC03g00330.1D2 | BnaA03g00410.1D2 |
| Pirola | BnaC03g00360.1D2 | BnaA03g00440.1D2 |
| Pirola | BnaC03g00420.1D2 | BnaA03g00490.1D2 |
| Pirola | BnaC03g00450.1D2 | BnaA03g02010.1D2 |
| Pirola | BnaC03g00460.1D2 | BnaA03g02020.1D2 |
| Pirola | BnaC03g00470.1D2 | BnaA03g02030.1D2 |
| Pirola | BnaC03g00500.1D2 | BnaA03g02050.1D2 |
| Pirola | BnaC03g00520.1D2 | BnaA03g02070.1D2 |
| Pirola | BnaC03g00560.1D2 | BnaA03g02110.1D2 |
| Pirola | BnaC03g00580.1D2 | BnaA03g02250.1D2 |
| Pirola | BnaC03g00610.1D2 | BnaA03g02220.1D2 |
| Pirola | BnaC03g00670.1D2 | BnaA03g02170.1D2 |
| Pirola | BnaC03g00710.1D2 | BnaA03g02140.1D2 |
| Pirola | BnaC03g00720.1D2 | BnaA03g02130.1D2 |
| Pirola | BnaC03g00740.1D2 | BnaA03g00540.1D2 |
| Pirola | BnaC03g00820.1D2 | BnaA03g00620.1D2 |
| Pirola | BnaC03g00830.1D2 | BnaA03g00630.1D2 |
| Pirola | BnaC03g00840.1D2 | BnaA03g00640.1D2 |
| Pirola | BnaC03g00850.1D2 | BnaA03g00650.1D2 |
| Pirola | BnaC03g00910.1D2 | BnaA03g00700.1D2 |
| Pirola | BnaC03g00920.1D2 | BnaA03g00710.1D2 |
| Pirola | BnaC03g00940.1D2 | BnaA03g00730.1D2 |
| Pirola | BnaC03g00960.1D2 | BnaA03g00750.1D2 |
| Pirola | BnaC03g00970.1D2 | BnaA03g00760.1D2 |
| Pirola | BnaC03g00990.1D2 | BnaA03g00780.1D2 |
| Pirola | BnaC03g01030.1D2 | BnaA03g00820.1D2 |
| Pirola | BnaC03g01050.1D2 | BnaA03g00840.1D2 |
| Pirola | BnaC03g01060.1D2 | BnaA03g00850.1D2 |
| Pirola | BnaC03g01160.1D2 | BnaA03g00980.1D2 |
| Pirola | BnaC03g01230.1D2 | BnaA03g01050.1D2 |
| Pirola | BnaC03g01240.1D2 | BnaA03g01060.1D2 |
| Pirola | BnaC03g01250.1D2 | BnaA03g01070.1D2 |
| Pirola | BnaC03g01260.1D2 | BnaA03g01080.1D2 |
| Pirola | BnaC03g01360.1D2 | BnaA03g01220.1D2 |
| Pirola | BnaC03g01420.1D2 | BnaA03g01300.1D2 |
| Pirola | BnaC03g01450.1D2 | BnaA03g01330.1D2 |
| Pirola | BnaC03g01460.1D2 | BnaA03g01340.1D2 |
| Pirola | BnaC03g01470.1D2 | BnaA03g01350.1D2 |
| Pirola | BnaC03g01480.1D2 | BnaA03g01360.1D2 |
| Pirola | BnaC03g01490.1D2 | BnaA03g01370.1D2 |
| Pirola | BnaC03g01530.1D2 | BnaA03g01410.1D2 |
| Pirola | BnaC03g01570.1D2 | BnaA03g01440.1D2 |
| Pirola | BnaC03g01580.1D2 | BnaA03g01450.1D2 |
| Pirola | BnaC03g01640.1D2 | BnaA03g07600.1D2 |
| Pirola | BnaC03g01670.1D2 | BnaA03g07630.1D2 |
| Pirola | BnaC03g01680.1D2 | BnaA03g07650.1D2 |
| Pirola | BnaC03g01790.1D2 | BnaA03g07730.1D2 |

|        |                  |                  |
|--------|------------------|------------------|
| Pirola | BnaC03g01820.1D2 | BnaA03g02290.1D2 |
| Pirola | BnaC03g01840.1D2 | BnaA03g01490.1D2 |
| Pirola | BnaC03g01900.1D2 | BnaA03g01550.1D2 |
| Pirola | BnaC03g01920.1D2 | BnaA03g01570.1D2 |
| Pirola | BnaC03g01950.1D2 | BnaA03g01600.1D2 |
| Pirola | BnaC03g02010.1D2 | BnaA03g01640.1D2 |
| Pirola | BnaC03g02030.1D2 | BnaA03g01670.1D2 |
| Pirola | BnaC03g02030.1D2 | BnaA03g01690.1D2 |
| Pirola | BnaC03g02040.1D2 | BnaA03g01670.1D2 |
| Pirola | BnaC03g02040.1D2 | BnaA03g01690.1D2 |
| Pirola | BnaC03g02070.1D2 | BnaA03g01710.1D2 |
| Pirola | BnaC03g02090.1D2 | BnaA03g01730.1D2 |
| Pirola | BnaC03g02180.1D2 | BnaA03g01780.1D2 |
| Pirola | BnaC03g02190.1D2 | BnaA03g01790.1D2 |
| Pirola | BnaC03g02200.1D2 | BnaA03g01800.1D2 |
| Pirola | BnaC03g02220.1D2 | BnaA03g01810.1D2 |
| Pirola | BnaC03g02240.1D2 | BnaA03g01840.1D2 |
| Pirola | BnaC03g02270.1D2 | BnaA03g01860.1D2 |
| Pirola | BnaC03g02290.1D2 | BnaA03g01880.1D2 |
| Pirola | BnaC03g02300.1D2 | BnaA03g01890.1D2 |
| Pirola | BnaC03g02300.1D2 | BnaA03g01910.1D2 |
| Pirola | BnaC03g02380.1D2 | BnaA03g07570.1D2 |
| Pirola | BnaC03g02400.1D2 | BnaA03g07560.1D2 |
| Pirola | BnaC03g02430.1D2 | BnaA03g07480.1D2 |
| Pirola | BnaC03g02510.1D2 | BnaA03g02530.1D2 |
| Pirola | BnaC03g02520.1D2 | BnaA03g02540.1D2 |
| Pirola | BnaC03g02530.1D2 | BnaA03g02550.1D2 |
| Pirola | BnaC03g02540.1D2 | BnaA03g02560.1D2 |
| Pirola | BnaC03g02610.1D2 | BnaA03g02600.1D2 |
| Pirola | BnaC03g02650.1D2 | BnaA03g02610.1D2 |
| Pirola | BnaC03g02650.1D2 | BnaA03g02620.1D2 |
| Pirola | BnaC03g02660.1D2 | BnaA03g02610.1D2 |
| Pirola | BnaC03g02660.1D2 | BnaA03g02620.1D2 |
| Pirola | BnaC03g02660.1D2 | BnaA03g08180.1D2 |
| Pirola | BnaC03g02680.1D2 | BnaA03g02660.1D2 |
| Pirola | BnaC03g02700.1D2 | BnaA03g02690.1D2 |
| Pirola | BnaC03g02780.1D2 | BnaA03g02780.1D2 |
| Pirola | BnaC03g02840.1D2 | BnaA03g02840.1D2 |
| Pirola | BnaC03g02850.1D2 | BnaA03g02850.1D2 |
| Pirola | BnaC03g02860.1D2 | BnaA03g02860.1D2 |
| Pirola | BnaC03g02880.1D2 | BnaA03g02880.1D2 |
| Pirola | BnaC03g02890.1D2 | BnaA03g02890.1D2 |
| Pirola | BnaC03g02920.1D2 | BnaA03g02940.1D2 |
| Pirola | BnaC03g02990.1D2 | BnaA03g03020.1D2 |
| Pirola | BnaC03g03000.1D2 | BnaA03g03030.1D2 |
| Pirola | BnaC03g03020.1D2 | BnaA03g03050.1D2 |
| Pirola | BnaC03g03030.1D2 | BnaA03g03060.1D2 |
| Pirola | BnaC03g03050.1D2 | BnaA03g07820.1D2 |
| Pirola | BnaC03g03120.1D2 | BnaA03g07330.1D2 |
| Pirola | BnaC03g03130.1D2 | BnaA03g07340.1D2 |
| Pirola | BnaC03g03150.1D2 | BnaA03g07360.1D2 |

|        |                  |                  |
|--------|------------------|------------------|
| Pirola | BnaC03g03230.1D2 | BnaA03g03160.1D2 |
| Pirola | BnaC03g03250.1D2 | BnaA03g03180.1D2 |
| Pirola | BnaC03g03280.1D2 | BnaA03g03220.1D2 |
| Pirola | BnaC03g03280.1D2 | BnaA03g03230.1D2 |
| Pirola | BnaC03g03290.1D2 | BnaA03g03240.1D2 |
| Pirola | BnaC03g03300.1D2 | BnaA03g03250.1D2 |
| Pirola | BnaC03g03320.1D2 | BnaA03g03270.1D2 |
| Pirola | BnaC03g03330.1D2 | BnaA03g03280.1D2 |
| Pirola | BnaC03g03350.1D2 | BnaA03g03300.1D2 |
| Pirola | BnaC03g03400.1D2 | BnaA03g07260.1D2 |
| Pirola | BnaC03g03410.1D2 | BnaA03g07250.1D2 |
| Pirola | BnaC03g03420.1D2 | BnaA03g07240.1D2 |
| Pirola | BnaC03g03440.1D2 | BnaA03g07220.1D2 |
| Pirola | BnaC03g03470.1D2 | BnaA03g07200.1D2 |
| Pirola | BnaC03g03500.1D2 | BnaA03g07180.1D2 |
| Pirola | BnaC03g03510.1D2 | BnaA03g07170.1D2 |
| Pirola | BnaC03g03570.1D2 | BnaA03g03320.1D2 |
| Pirola | BnaC03g03590.1D2 | BnaA03g03370.1D2 |
| Pirola | BnaC03g03620.1D2 | BnaA03g03390.1D2 |
| Pirola | BnaC03g03630.1D2 | BnaA03g03400.1D2 |
| Pirola | BnaC03g03700.1D2 | BnaA03g03440.1D2 |
| Pirola | BnaC03g03710.1D2 | BnaA03g03450.1D2 |
| Pirola | BnaC03g03730.1D2 | BnaA03g03470.1D2 |
| Pirola | BnaC03g03740.1D2 | BnaA03g03480.1D2 |
| Pirola | BnaC03g03750.1D2 | BnaA03g03490.1D2 |
| Pirola | BnaC03g03750.1D2 | BnaA03g03790.1D2 |
| Pirola | BnaC03g03760.1D2 | BnaA03g03500.1D2 |
| Pirola | BnaC03g03800.1D2 | BnaA03g03530.1D2 |
| Pirola | BnaC03g03820.1D2 | BnaA03g03550.1D2 |
| Pirola | BnaC03g03920.1D2 | BnaA03g01170.1D2 |
| Pirola | BnaC03g03970.1D2 | BnaA03g03620.1D2 |
| Pirola | BnaC03g04050.1D2 | BnaA03g03670.1D2 |
| Pirola | BnaC03g04060.1D2 | BnaA03g03680.1D2 |
| Pirola | BnaC03g04080.1D2 | BnaA03g03700.1D2 |
| Pirola | BnaC03g04160.1D2 | BnaA03g03800.1D2 |
| Pirola | BnaC03g04170.1D2 | BnaA03g03490.1D2 |
| Pirola | BnaC03g04170.1D2 | BnaA03g03790.1D2 |
| Pirola | BnaC03g04180.1D2 | BnaA03g03780.1D2 |
| Pirola | BnaC03g04210.1D2 | BnaA03g03830.1D2 |
| Pirola | BnaC03g04220.1D2 | BnaA03g03840.1D2 |
| Pirola | BnaC03g04240.1D2 | BnaA03g03870.1D2 |
| Pirola | BnaC03g04390.1D2 | BnaA03g03970.1D2 |
| Pirola | BnaC03g04450.1D2 | BnaA03g04010.1D2 |
| Pirola | BnaC03g04460.1D2 | BnaA03g04020.1D2 |
| Pirola | BnaC03g04530.1D2 | BnaA03g04080.1D2 |
| Pirola | BnaC03g04560.1D2 | BnaA03g04100.1D2 |
| Pirola | BnaC03g04570.1D2 | BnaA03g04110.1D2 |
| Pirola | BnaC03g04580.1D2 | BnaA03g04120.1D2 |
| Pirola | BnaC03g04600.1D2 | BnaA03g04130.1D2 |
| Pirola | BnaC03g04610.1D2 | BnaA03g04140.1D2 |
| Pirola | BnaC03g04620.1D2 | BnaA03g04150.1D2 |



|        |                  |                  |
|--------|------------------|------------------|
| Pirola | BnaC03g04630.1D2 | BnaA03g04160.1D2 |
| Pirola | BnaC03g04660.1D2 | BnaA03g04200.1D2 |
| Pirola | BnaC03g04670.1D2 | BnaA03g04210.1D2 |
| Pirola | BnaC03g04730.1D2 | BnaA03g04270.1D2 |
| Pirola | BnaC03g04760.1D2 | BnaA03g04300.1D2 |
| Pirola | BnaC03g04800.1D2 | BnaA03g04330.1D2 |
| Pirola | BnaC03g04820.1D2 | BnaA03g04350.1D2 |
| Pirola | BnaC03g04830.1D2 | BnaA03g04360.1D2 |
| Pirola | BnaC03g04890.1D2 | BnaA03g04390.1D2 |
| Pirola | BnaC03g04900.1D2 | BnaA03g04400.1D2 |
| Pirola | BnaC03g04990.1D2 | BnaA03g04450.1D2 |
| Pirola | BnaC03g05070.1D2 | BnaA03g04540.1D2 |
| Pirola | BnaC03g05100.1D2 | BnaA03g04580.1D2 |
| Pirola | BnaC03g05180.1D2 | BnaA03g04650.1D2 |
| Pirola | BnaC03g05190.1D2 | BnaA03g04660.1D2 |
| Pirola | BnaC03g05210.1D2 | BnaA03g04680.1D2 |
| Pirola | BnaC03g05220.1D2 | BnaA03g04690.1D2 |
| Pirola | BnaC03g05260.1D2 | BnaA03g04790.1D2 |
| Pirola | BnaC03g05360.1D2 | BnaA03g04880.1D2 |
| Pirola | BnaC03g05430.1D2 | BnaA03g04930.1D2 |
| Pirola | BnaC03g05440.1D2 | BnaA03g04940.1D2 |
| Pirola | BnaC03g05460.1D2 | BnaA03g04960.1D2 |
| Pirola | BnaC03g05510.1D2 | BnaA03g05010.1D2 |
| Pirola | BnaC03g05520.1D2 | BnaA03g05020.1D2 |
| Pirola | BnaC03g05530.1D2 | BnaA03g05030.1D2 |
| Pirola | BnaC03g05640.1D2 | BnaA03g05120.1D2 |
| Pirola | BnaC03g05680.1D2 | BnaA03g05160.1D2 |
| Pirola | BnaC03g05700.1D2 | BnaA03g05190.1D2 |
| Pirola | BnaC03g05840.1D2 | BnaA03g05300.1D2 |
| Pirola | BnaC03g05890.1D2 | BnaA03g05340.1D2 |
| Pirola | BnaC03g05950.1D2 | BnaA03g05410.1D2 |
| Pirola | BnaC03g05960.1D2 | BnaA03g05420.1D2 |
| Pirola | BnaC03g06050.1D2 | BnaA03g05550.1D2 |
| Pirola | BnaC03g06130.1D2 | BnaA03g05610.1D2 |
| Pirola | BnaC03g06200.1D2 | BnaA03g05670.1D2 |
| Pirola | BnaC03g06210.1D2 | BnaA03g05680.1D2 |
| Pirola | BnaC03g10900.1D2 | BnaA03g04750.1D2 |
| Pirola | BnaC03g10930.1D2 | BnaA03g04730.1D2 |
| Pirola | BnaC03g10940.1D2 | BnaA03g04720.1D2 |
| Pirola | BnaC03g10970.1D2 | BnaA03g04700.1D2 |
| RS_4_6 | BnaC03g00320.1D2 | BnaA03g00400.1D2 |
| RS_4_6 | BnaC03g00360.1D2 | BnaA03g00440.1D2 |
| RS_4_6 | BnaC03g00450.1D2 | BnaA03g02010.1D2 |
| RS_4_6 | BnaC03g00470.1D2 | BnaA03g02030.1D2 |
| RS_4_6 | BnaC03g00520.1D2 | BnaA03g02070.1D2 |
| RS_4_6 | BnaC03g00530.1D2 | BnaA03g02080.1D2 |
| RS_4_6 | BnaC03g00560.1D2 | BnaA03g02110.1D2 |
| RS_4_6 | BnaC03g00740.1D2 | BnaA03g00540.1D2 |
| RS_4_6 | BnaC03g00850.1D2 | BnaA03g00650.1D2 |
| RS_4_6 | BnaC03g00890.1D2 | BnaA03g00680.1D2 |
| RS_4_6 | BnaC03g01030.1D2 | BnaA03g00820.1D2 |

|           |                  |                  |
|-----------|------------------|------------------|
| RS_4_6    | BnaC03g01230.1D2 | BnaA03g01050.1D2 |
| RS_4_6    | BnaC03g01240.1D2 | BnaA03g01060.1D2 |
| RS_4_6    | BnaC03g01360.1D2 | BnaA03g01220.1D2 |
| RS_4_6    | BnaC03g01410.1D2 | BnaA03g01290.1D2 |
| RS_4_6    | BnaC03g01420.1D2 | BnaA03g01300.1D2 |
| RS_4_6    | BnaC03g01450.1D2 | BnaA03g01330.1D2 |
| RS_4_6    | BnaC03g01490.1D2 | BnaA03g01370.1D2 |
| RS_4_6    | BnaC03g01540.1D2 | BnaA03g01420.1D2 |
| RS_4_6    | BnaC03g01570.1D2 | BnaA03g01440.1D2 |
| RS_4_6    | BnaC03g01790.1D2 | BnaA03g07730.1D2 |
| RS_4_6    | BnaC03g01820.1D2 | BnaA03g02290.1D2 |
| RS_4_6    | BnaC03g01860.1D2 | BnaA03g01530.1D2 |
| RS_4_6    | BnaC03g01900.1D2 | BnaA03g01550.1D2 |
| RS_4_6    | BnaC03g02090.1D2 | BnaA03g01730.1D2 |
| RS_4_6    | BnaC03g02180.1D2 | BnaA03g01780.1D2 |
| RS_4_6    | BnaC03g02240.1D2 | BnaA03g01840.1D2 |
| RS_4_6    | BnaC03g02520.1D2 | BnaA03g02540.1D2 |
| RS_4_6    | BnaC03g02600.1D2 | BnaA03g02600.1D2 |
| RS_4_6    | BnaC03g02610.1D2 | BnaA03g02600.1D2 |
| RS_4_6    | BnaC03g02650.1D2 | BnaA03g02610.1D2 |
| RS_4_6    | BnaC03g02650.1D2 | BnaA03g02620.1D2 |
| RS_4_6    | BnaC03g02680.1D2 | BnaA03g02660.1D2 |
| RS_4_6    | BnaC03g03110.1D2 | BnaA03g07320.1D2 |
| RS_4_6    | BnaC03g03130.1D2 | BnaA03g07340.1D2 |
| RS_4_6    | BnaC03g03270.1D2 | BnaA03g03220.1D2 |
| RS_4_6    | BnaC03g03270.1D2 | BnaA03g03230.1D2 |
| RS_4_6    | BnaC03g03280.1D2 | BnaA03g03220.1D2 |
| RS_4_6    | BnaC03g03280.1D2 | BnaA03g03230.1D2 |
| RS_4_6    | BnaC03g03410.1D2 | BnaA03g07250.1D2 |
| RS_4_6    | BnaC03g03470.1D2 | BnaA03g07200.1D2 |
| RS_4_6    | BnaC03g03630.1D2 | BnaA03g03400.1D2 |
| RS_4_6    | BnaC03g03690.1D2 | BnaA03g03430.1D2 |
| RS_4_6    | BnaC03g03750.1D2 | BnaA03g03490.1D2 |
| RS_4_6    | BnaC03g03750.1D2 | BnaA03g03790.1D2 |
| RS_4_6    | BnaC03g03890.1D2 | BnaA03g01140.1D2 |
| RS_4_6    | BnaC03g03900.1D2 | BnaA03g01150.1D2 |
| RS_4_6    | BnaC03g03920.1D2 | BnaA03g01170.1D2 |
| RS_4_6    | BnaC03g04170.1D2 | BnaA03g03490.1D2 |
| RS_4_6    | BnaC03g04170.1D2 | BnaA03g03790.1D2 |
| RS_4_6    | BnaC03g04210.1D2 | BnaA03g03830.1D2 |
| RS_4_6    | BnaC03g04220.1D2 | BnaA03g03840.1D2 |
| Sensation | BnaC03g00080.1D2 | BnaA03g00170.1D2 |
| Sensation | BnaC03g00100.1D2 | BnaA03g00190.1D2 |
| Sensation | BnaC03g00120.1D2 | BnaA03g00210.1D2 |
| Sensation | BnaC03g00140.1D2 | BnaA03g00230.1D2 |
| Sensation | BnaC03g00150.1D2 | BnaA03g00240.1D2 |
| Sensation | BnaC03g00160.1D2 | BnaA03g00250.1D2 |
| Sensation | BnaC03g00180.1D2 | BnaA03g00270.1D2 |
| Sensation | BnaC03g00320.1D2 | BnaA03g00400.1D2 |
| Sensation | BnaC03g00340.1D2 | BnaA03g00420.1D2 |
| Sensation | BnaC03g00360.1D2 | BnaA03g00440.1D2 |

|           |                  |                  |
|-----------|------------------|------------------|
| Sensation | BnaC03g00420.1D2 | BnaA03g00490.1D2 |
| Sensation | BnaC03g00450.1D2 | BnaA03g02010.1D2 |
| Sensation | BnaC03g00460.1D2 | BnaA03g02020.1D2 |
| Sensation | BnaC03g00470.1D2 | BnaA03g02030.1D2 |
| Sensation | BnaC03g00520.1D2 | BnaA03g02070.1D2 |
| Sensation | BnaC03g00530.1D2 | BnaA03g02080.1D2 |
| Sensation | BnaC03g00560.1D2 | BnaA03g02110.1D2 |
| Sensation | BnaC03g00610.1D2 | BnaA03g02220.1D2 |
| Sensation | BnaC03g00720.1D2 | BnaA03g02130.1D2 |
| Sensation | BnaC03g00890.1D2 | BnaA03g00680.1D2 |
| Sensation | BnaC03g00920.1D2 | BnaA03g00710.1D2 |
| Sensation | BnaC03g00970.1D2 | BnaA03g00760.1D2 |
| Sensation | BnaC03g01160.1D2 | BnaA03g00980.1D2 |
| Sensation | BnaC03g01170.1D2 | BnaA03g00990.1D2 |
| Sensation | BnaC03g01220.1D2 | BnaA03g01040.1D2 |
| Sensation | BnaC03g01260.1D2 | BnaA03g01080.1D2 |
| Sensation | BnaC03g01270.1D2 | BnaA03g01090.1D2 |
| Sensation | BnaC03g01420.1D2 | BnaA03g01300.1D2 |
| Sensation | BnaC03g01450.1D2 | BnaA03g01330.1D2 |
| Sensation | BnaC03g01480.1D2 | BnaA03g01360.1D2 |
| Sensation | BnaC03g01490.1D2 | BnaA03g01370.1D2 |
| Sensation | BnaC03g01530.1D2 | BnaA03g01410.1D2 |
| Sensation | BnaC03g01540.1D2 | BnaA03g01420.1D2 |
| Sensation | BnaC03g01570.1D2 | BnaA03g01440.1D2 |
| Sensation | BnaC03g01580.1D2 | BnaA03g01450.1D2 |
| Sensation | BnaC03g01790.1D2 | BnaA03g07730.1D2 |
| Sensation | BnaC03g01820.1D2 | BnaA03g02290.1D2 |
| Sensation | BnaC03g01900.1D2 | BnaA03g01550.1D2 |
| Sensation | BnaC03g01920.1D2 | BnaA03g01570.1D2 |
| Sensation | BnaC03g01950.1D2 | BnaA03g01600.1D2 |
| Sensation | BnaC03g02010.1D2 | BnaA03g01640.1D2 |
| Sensation | BnaC03g02190.1D2 | BnaA03g01790.1D2 |
| Sensation | BnaC03g02200.1D2 | BnaA03g01800.1D2 |
| Sensation | BnaC03g02240.1D2 | BnaA03g01840.1D2 |
| Sensation | BnaC03g02290.1D2 | BnaA03g01880.1D2 |
| Sensation | BnaC03g02300.1D2 | BnaA03g01890.1D2 |
| Sensation | BnaC03g02300.1D2 | BnaA03g01910.1D2 |
| Sensation | BnaC03g02380.1D2 | BnaA03g07570.1D2 |
| Sensation | BnaC03g02400.1D2 | BnaA03g07560.1D2 |
| Sensation | BnaC03g02430.1D2 | BnaA03g07480.1D2 |
| Sensation | BnaC03g02610.1D2 | BnaA03g02600.1D2 |
| Sensation | BnaC03g02680.1D2 | BnaA03g02660.1D2 |
| Sensation | BnaC03g02890.1D2 | BnaA03g02890.1D2 |
| Sensation | BnaC03g02920.1D2 | BnaA03g02940.1D2 |
| Sensation | BnaC03g03280.1D2 | BnaA03g03220.1D2 |
| Sensation | BnaC03g03280.1D2 | BnaA03g03230.1D2 |
| Sensation | BnaC03g03330.1D2 | BnaA03g03280.1D2 |
| Sensation | BnaC03g03350.1D2 | BnaA03g03300.1D2 |
| Sensation | BnaC03g03420.1D2 | BnaA03g07240.1D2 |
| Sensation | BnaC03g03440.1D2 | BnaA03g07220.1D2 |
| Sensation | BnaC03g03590.1D2 | BnaA03g03370.1D2 |

|           |                  |                  |
|-----------|------------------|------------------|
| Sensation | BnaC03g03630.1D2 | BnaA03g03400.1D2 |
| Sensation | BnaC03g03690.1D2 | BnaA03g03430.1D2 |
| Sensation | BnaC03g03750.1D2 | BnaA03g03490.1D2 |
| Sensation | BnaC03g03750.1D2 | BnaA03g03790.1D2 |
| Sensation | BnaC03g04170.1D2 | BnaA03g03490.1D2 |
| Sensation | BnaC03g04170.1D2 | BnaA03g03790.1D2 |
| Sensation | BnaC03g04180.1D2 | BnaA03g03780.1D2 |
| Sensation | BnaC03g04210.1D2 | BnaA03g03830.1D2 |
| Sensation | BnaC03g04220.1D2 | BnaA03g03840.1D2 |
| Sensation | BnaC03g04330.1D2 | BnaA03g03920.1D2 |
| Sensation | BnaC03g04390.1D2 | BnaA03g03970.1D2 |
| Sensation | BnaC03g04420.1D2 | BnaA03g04000.1D2 |
| Sensation | BnaC03g04450.1D2 | BnaA03g04010.1D2 |
| Sensation | BnaC03g04460.1D2 | BnaA03g04020.1D2 |
| Sensation | BnaC03g04500.1D2 | BnaA03g04050.1D2 |
| Sensation | BnaC03g04530.1D2 | BnaA03g04080.1D2 |
| Sensation | BnaC03g04560.1D2 | BnaA03g04100.1D2 |
| Sensation | BnaC03g04570.1D2 | BnaA03g04110.1D2 |
| Sensation | BnaC03g04580.1D2 | BnaA03g04120.1D2 |
| Sensation | BnaC03g04600.1D2 | BnaA03g04130.1D2 |
| Sensation | BnaC03g04610.1D2 | BnaA03g04140.1D2 |
| Sensation | BnaC03g04630.1D2 | BnaA03g04160.1D2 |
| Sensation | BnaC03g04710.1D2 | BnaA03g04250.1D2 |
| Sensation | BnaC03g04730.1D2 | BnaA03g04270.1D2 |
| Sensation | BnaC03g04760.1D2 | BnaA03g04300.1D2 |
| Sensation | BnaC03g04780.1D2 | BnaA03g04320.1D2 |
| Sensation | BnaC03g04900.1D2 | BnaA03g04400.1D2 |
| Sensation | BnaC03g04990.1D2 | BnaA03g04450.1D2 |
| Sensation | BnaC03g05070.1D2 | BnaA03g04540.1D2 |
| Sensation | BnaC03g05100.1D2 | BnaA03g04580.1D2 |
| Sensation | BnaC03g05180.1D2 | BnaA03g04650.1D2 |
| Sensation | BnaC03g05190.1D2 | BnaA03g04660.1D2 |
| Sensation | BnaC03g05430.1D2 | BnaA03g04930.1D2 |
| Sensation | BnaC03g05440.1D2 | BnaA03g04940.1D2 |
| Sensation | BnaC03g05460.1D2 | BnaA03g04960.1D2 |
| Sensation | BnaC03g05470.1D2 | BnaA03g04970.1D2 |
| Sensation | BnaC03g05510.1D2 | BnaA03g05010.1D2 |
| Sensation | BnaC03g05520.1D2 | BnaA03g05020.1D2 |
| Sensation | BnaC03g05530.1D2 | BnaA03g05030.1D2 |
| Sensation | BnaC03g05640.1D2 | BnaA03g05120.1D2 |
| Sensation | BnaC03g05650.1D2 | BnaA03g05130.1D2 |
| Sensation | BnaC03g05660.1D2 | BnaA03g05140.1D2 |
| Sensation | BnaC03g05680.1D2 | BnaA03g05160.1D2 |
| Sensation | BnaC03g05830.1D2 | BnaA03g05290.1D2 |
| Sensation | BnaC03g05840.1D2 | BnaA03g05300.1D2 |
| Sensation | BnaC03g05860.1D2 | BnaA03g05320.1D2 |
| Sensation | BnaC03g05960.1D2 | BnaA03g05420.1D2 |
| Sensation | BnaC03g05980.1D2 | BnaA03g05440.1D2 |
| Sensation | BnaC03g05990.1D2 | BnaA03g05450.1D2 |
| Sensation | BnaC03g06010.1D2 | BnaA03g05510.1D2 |
| Sensation | BnaC03g06120.1D2 | BnaA03g05610.1D2 |

|           |                  |                  |
|-----------|------------------|------------------|
| Sensation | BnaC03g06130.1D2 | BnaA03g05610.1D2 |
| Sensation | BnaC03g06150.1D2 | BnaA03g05630.1D2 |
| Sensation | BnaC03g06180.1D2 | BnaA03g05660.1D2 |
| Sensation | BnaC03g06200.1D2 | BnaA03g05670.1D2 |
| Sensation | BnaC03g06380.1D2 | BnaA03g05780.1D2 |
| Sensation | BnaC03g06390.1D2 | BnaA03g05790.1D2 |
| Sensation | BnaC03g06470.1D2 | BnaA03g05850.1D2 |
| Sensation | BnaC03g06500.1D2 | BnaA03g05880.1D2 |
| Sensation | BnaC03g06520.1D2 | BnaA03g05900.1D2 |
| Sensation | BnaC03g06560.1D2 | BnaA03g05910.1D2 |
| Sensation | BnaC03g06600.1D2 | BnaA03g06030.1D2 |
| Sensation | BnaC03g06610.1D2 | BnaA03g05910.1D2 |
| Sensation | BnaC03g06620.1D2 | BnaA03g05920.1D2 |
| Sensation | BnaC03g06630.1D2 | BnaA03g05920.1D2 |
| Sensation | BnaC03g06640.1D2 | BnaA03g05940.1D2 |
| Sensation | BnaC03g06650.1D2 | BnaA03g05950.1D2 |
| Sensation | BnaC03g06670.1D2 | BnaA03g06020.1D2 |
| Sensation | BnaC03g06680.1D2 | BnaA03g06030.1D2 |
| Sensation | BnaC03g06690.1D2 | BnaA03g06040.1D2 |
| Sensation | BnaC03g06700.1D2 | BnaA03g06050.1D2 |
| Sensation | BnaC03g06720.1D2 | BnaA03g06070.1D2 |
| Sensation | BnaC03g06770.1D2 | BnaA03g06110.1D2 |
| Sensation | BnaC03g06780.1D2 | BnaA03g06120.1D2 |
| Sensation | BnaC03g06790.1D2 | BnaA03g06130.1D2 |
| Sensation | BnaC03g06800.1D2 | BnaA03g06130.1D2 |
| Sensation | BnaC03g06880.1D2 | BnaA03g06210.1D2 |
| Sensation | BnaC03g06900.1D2 | BnaA03g06230.1D2 |
| Sensation | BnaC03g06930.1D2 | BnaA03g06270.1D2 |
| Sensation | BnaC03g06940.1D2 | BnaA03g06280.1D2 |
| Sensation | BnaC03g07120.1D2 | BnaA03g06460.1D2 |
| Sensation | BnaC03g07430.1D2 | BnaA03g06680.1D2 |
| Sensation | BnaC03g07480.1D2 | BnaA03g06760.1D2 |
| Sensation | BnaC03g07520.1D2 | BnaA03g06800.1D2 |
| Sensation | BnaC03g07530.1D2 | BnaA03g06810.1D2 |
| Sensation | BnaC03g07630.1D2 | BnaA03g06910.1D2 |
| Sensation | BnaC03g07980.1D2 | BnaA03g08190.1D2 |
| Sensation | BnaC03g08050.1D2 | BnaA03g08250.1D2 |
| Sensation | BnaC03g08180.1D2 | BnaA03g08350.1D2 |
| Sensation | BnaC03g08270.1D2 | BnaA03g08420.1D2 |
| Sensation | BnaC03g08300.1D2 | BnaA03g08450.1D2 |
| Sensation | BnaC03g08380.1D2 | BnaA03g08510.1D2 |
| Sensation | BnaC03g08440.1D2 | BnaA03g08560.1D2 |
| Sensation | BnaC03g08460.1D2 | BnaA03g08580.1D2 |
| Sensation | BnaC03g08550.1D2 | BnaA03g08680.1D2 |
| Sensation | BnaC03g08560.1D2 | BnaA03g08690.1D2 |
| Sensation | BnaC03g10940.1D2 | BnaA03g04720.1D2 |
| Sensation | BnaC03g11050.1D2 | BnaA03g08510.1D2 |
| Sensation | BnaC03g11210.1D2 | BnaA03g08500.1D2 |
| Sensation | BnaC03g11270.1D2 | BnaA03g08500.1D2 |
| Tapidor   | BnaC03g00100.1D2 | BnaA03g00190.1D2 |
| Tapidor   | BnaC03g00120.1D2 | BnaA03g00210.1D2 |

|         |                  |                  |
|---------|------------------|------------------|
| Tapidor | BnaC03g00140.1D2 | BnaA03g00230.1D2 |
| Tapidor | BnaC03g00150.1D2 | BnaA03g00240.1D2 |
| Tapidor | BnaC03g00160.1D2 | BnaA03g00250.1D2 |
| Tapidor | BnaC03g00270.1D2 | BnaA03g00350.1D2 |
| Tapidor | BnaC03g00280.1D2 | BnaA03g00360.1D2 |
| Tapidor | BnaC03g00320.1D2 | BnaA03g00400.1D2 |
| Tapidor | BnaC03g00360.1D2 | BnaA03g00440.1D2 |
| Tapidor | BnaC03g00420.1D2 | BnaA03g00490.1D2 |
| Tapidor | BnaC03g00450.1D2 | BnaA03g02010.1D2 |
| Tapidor | BnaC03g00460.1D2 | BnaA03g02020.1D2 |
| Tapidor | BnaC03g00470.1D2 | BnaA03g02030.1D2 |
| Tapidor | BnaC03g00500.1D2 | BnaA03g02050.1D2 |
| Tapidor | BnaC03g00520.1D2 | BnaA03g02070.1D2 |
| Tapidor | BnaC03g00530.1D2 | BnaA03g02080.1D2 |
| Tapidor | BnaC03g00540.1D2 | BnaA03g02090.1D2 |
| Tapidor | BnaC03g00550.1D2 | BnaA03g02100.1D2 |
| Tapidor | BnaC03g00560.1D2 | BnaA03g02110.1D2 |
| Tapidor | BnaC03g00580.1D2 | BnaA03g02250.1D2 |
| Tapidor | BnaC03g00610.1D2 | BnaA03g02220.1D2 |
| Tapidor | BnaC03g00710.1D2 | BnaA03g02140.1D2 |
| Tapidor | BnaC03g00740.1D2 | BnaA03g00540.1D2 |
| Tapidor | BnaC03g00820.1D2 | BnaA03g00620.1D2 |
| Tapidor | BnaC03g00830.1D2 | BnaA03g00630.1D2 |
| Tapidor | BnaC03g00850.1D2 | BnaA03g00650.1D2 |
| Tapidor | BnaC03g00920.1D2 | BnaA03g00710.1D2 |
| Tapidor | BnaC03g01160.1D2 | BnaA03g00980.1D2 |
| Tapidor | BnaC03g01230.1D2 | BnaA03g01050.1D2 |
| Tapidor | BnaC03g01240.1D2 | BnaA03g01060.1D2 |
| Tapidor | BnaC03g01260.1D2 | BnaA03g01080.1D2 |
| Tapidor | BnaC03g01360.1D2 | BnaA03g01220.1D2 |
| Tapidor | BnaC03g01410.1D2 | BnaA03g01290.1D2 |
| Tapidor | BnaC03g01420.1D2 | BnaA03g01300.1D2 |
| Tapidor | BnaC03g01430.1D2 | BnaA03g01310.1D2 |
| Tapidor | BnaC03g01450.1D2 | BnaA03g01330.1D2 |
| Tapidor | BnaC03g01460.1D2 | BnaA03g01340.1D2 |
| Tapidor | BnaC03g01470.1D2 | BnaA03g01350.1D2 |
| Tapidor | BnaC03g01480.1D2 | BnaA03g01360.1D2 |
| Tapidor | BnaC03g01490.1D2 | BnaA03g01370.1D2 |
| Tapidor | BnaC03g01540.1D2 | BnaA03g01420.1D2 |
| Tapidor | BnaC03g01670.1D2 | BnaA03g07630.1D2 |
| Tapidor | BnaC03g01820.1D2 | BnaA03g02290.1D2 |
| Tapidor | BnaC03g02190.1D2 | BnaA03g01790.1D2 |
| Tapidor | BnaC03g02240.1D2 | BnaA03g01840.1D2 |
| Tapidor | BnaC03g02300.1D2 | BnaA03g01890.1D2 |
| Tapidor | BnaC03g02300.1D2 | BnaA03g01910.1D2 |
| Tapidor | BnaC03g02330.1D2 | BnaA03g01930.1D2 |
| Tapidor | BnaC03g02380.1D2 | BnaA03g07570.1D2 |
| Tapidor | BnaC03g02400.1D2 | BnaA03g07560.1D2 |
| Tapidor | BnaC03g02430.1D2 | BnaA03g07480.1D2 |
| Tapidor | BnaC03g02600.1D2 | BnaA03g02600.1D2 |
| Tapidor | BnaC03g02610.1D2 | BnaA03g02600.1D2 |

|         |                  |                  |
|---------|------------------|------------------|
| Tapidor | BnaC03g02680.1D2 | BnaA03g02660.1D2 |
| Tapidor | BnaC03g02890.1D2 | BnaA03g02890.1D2 |
| Tapidor | BnaC03g02920.1D2 | BnaA03g02940.1D2 |
| Tapidor | BnaC03g03110.1D2 | BnaA03g07320.1D2 |
| Tapidor | BnaC03g03320.1D2 | BnaA03g03270.1D2 |
| Tapidor | BnaC03g03590.1D2 | BnaA03g03370.1D2 |
| Tapidor | BnaC03g03750.1D2 | BnaA03g03490.1D2 |
| Tapidor | BnaC03g03750.1D2 | BnaA03g03790.1D2 |
| Tapidor | BnaC03g04170.1D2 | BnaA03g03490.1D2 |
| Tapidor | BnaC03g04170.1D2 | BnaA03g03790.1D2 |
| Tapidor | BnaC03g04210.1D2 | BnaA03g03830.1D2 |
| Tapidor | BnaC03g04460.1D2 | BnaA03g04020.1D2 |
| Tapidor | BnaC03g04530.1D2 | BnaA03g04080.1D2 |
| Tapidor | BnaC03g04580.1D2 | BnaA03g04120.1D2 |
| Tapidor | BnaC03g04610.1D2 | BnaA03g04140.1D2 |
| Tapidor | BnaC03g04710.1D2 | BnaA03g04250.1D2 |
| Tapidor | BnaC03g04730.1D2 | BnaA03g04270.1D2 |
| Tapidor | BnaC03g04760.1D2 | BnaA03g04300.1D2 |
| Tapidor | BnaC03g04780.1D2 | BnaA03g04320.1D2 |
| Tapidor | BnaC03g04990.1D2 | BnaA03g04450.1D2 |
| Tapidor | BnaC03g05100.1D2 | BnaA03g04580.1D2 |
| Tapidor | BnaC03g05180.1D2 | BnaA03g04650.1D2 |

**List of HE genes (C04 to A04)**

| <b>Accession</b> | <b>Lost gene</b> | <b>Duplicated HE gene</b> |
|------------------|------------------|---------------------------|
| GSchnittkohl     | BnaC04g00950.1D2 | BnaA04g26610.1D2          |
| GSchnittkohl     | BnaC04g42090.1D2 | BnaA04g23660.1D2          |
| GSchnittkohl     | BnaC04g42140.1D2 | BnaA04g23690.1D2          |
| GSchnittkohl     | BnaC04g42230.1D2 | BnaA04g22660.1D2          |
| GSchnittkohl     | BnaC04g42290.1D2 | BnaA04g22730.1D2          |
| GSchnittkohl     | BnaC04g42370.1D2 | BnaA04g22930.1D2          |
| GSchnittkohl     | BnaC04g42400.1D2 | BnaA04g22960.1D2          |
| GSchnittkohl     | BnaC04g42410.1D2 | BnaA04g22970.1D2          |
| GSchnittkohl     | BnaC04g42430.1D2 | BnaA04g22990.1D2          |
| GSchnittkohl     | BnaC04g42440.1D2 | BnaA04g23000.1D2          |
| GSchnittkohl     | BnaC04g42920.1D2 | BnaA04g23630.1D2          |
| GSchnittkohl     | BnaC04g42950.1D2 | BnaA04g23040.1D2          |
| GSchnittkohl     | BnaC04g42960.1D2 | BnaA04g23050.1D2          |
| GSchnittkohl     | BnaC04g42990.1D2 | BnaA04g23090.1D2          |
| GSchnittkohl     | BnaC04g43010.1D2 | BnaA04g23110.1D2          |
| GSchnittkohl     | BnaC04g43050.1D2 | BnaA04g23140.1D2          |
| GSchnittkohl     | BnaC04g43070.1D2 | BnaA04g23160.1D2          |
| GSchnittkohl     | BnaC04g43110.1D2 | BnaA04g23190.1D2          |
| GSchnittkohl     | BnaC04g43270.1D2 | BnaA04g23320.1D2          |
| GSchnittkohl     | BnaC04g43290.1D2 | BnaA04g23340.1D2          |
| GSchnittkohl     | BnaC04g43340.1D2 | BnaA04g23390.1D2          |
| GSchnittkohl     | BnaC04g43350.1D2 | BnaA04g23400.1D2          |
| GSchnittkohl     | BnaC04g43470.1D2 | BnaA04g23490.1D2          |
| GSchnittkohl     | BnaC04g43500.1D2 | BnaA04g23520.1D2          |
| GSchnittkohl     | BnaC04g43650.1D2 | BnaA04g23810.1D2          |
| GSchnittkohl     | BnaC04g43660.1D2 | BnaA04g23820.1D2          |

|              |                  |                  |
|--------------|------------------|------------------|
| GSchnittkohl | BnaC04g43670.1D2 | BnaA04g23830.1D2 |
| GSchnittkohl | BnaC04g43680.1D2 | BnaA04g23840.1D2 |
| GSchnittkohl | BnaC04g43690.1D2 | BnaA04g23850.1D2 |
| GSchnittkohl | BnaC04g43700.1D2 | BnaA04g23860.1D2 |
| GSchnittkohl | BnaC04g43740.1D2 | BnaA04g23900.1D2 |
| GSchnittkohl | BnaC04g43970.1D2 | BnaA04g24260.1D2 |
| GSchnittkohl | BnaC04g43990.1D2 | BnaA04g24280.1D2 |
| GSchnittkohl | BnaC04g44080.1D2 | BnaA04g24420.1D2 |
| GSchnittkohl | BnaC04g44090.1D2 | BnaA04g24430.1D2 |
| GSchnittkohl | BnaC04g44130.1D2 | BnaA04g24460.1D2 |
| GSchnittkohl | BnaC04g44140.1D2 | BnaA04g24470.1D2 |
| GSchnittkohl | BnaC04g44170.1D2 | BnaA04g24490.1D2 |
| GSchnittkohl | BnaC04g44170.1D2 | BnaA04g24500.1D2 |
| GSchnittkohl | BnaC04g44210.1D2 | BnaA04g24520.1D2 |
| GSchnittkohl | BnaC04g44220.1D2 | BnaA04g24530.1D2 |
| GSchnittkohl | BnaC04g44230.1D2 | BnaA04g24540.1D2 |
| GSchnittkohl | BnaC04g44280.1D2 | BnaA04g24610.1D2 |
| GSchnittkohl | BnaC04g44340.1D2 | BnaA04g24650.1D2 |
| GSchnittkohl | BnaC04g44350.1D2 | BnaA04g24660.1D2 |
| GSchnittkohl | BnaC04g44370.1D2 | BnaA04g24680.1D2 |
| GSchnittkohl | BnaC04g44420.1D2 | BnaA04g24750.1D2 |
| GSchnittkohl | BnaC04g44460.1D2 | BnaA04g24770.1D2 |
| GSchnittkohl | BnaC04g44480.1D2 | BnaA04g25310.1D2 |
| GSchnittkohl | BnaC04g44500.1D2 | BnaA04g24810.1D2 |
| GSchnittkohl | BnaC04g44520.1D2 | BnaA04g24830.1D2 |
| GSchnittkohl | BnaC04g44540.1D2 | BnaA04g24850.1D2 |
| GSchnittkohl | BnaC04g44550.1D2 | BnaA04g24860.1D2 |
| GSchnittkohl | BnaC04g44560.1D2 | BnaA04g24870.1D2 |
| GSchnittkohl | BnaC04g44570.1D2 | BnaA04g24880.1D2 |
| GSchnittkohl | BnaC04g44580.1D2 | BnaA04g24890.1D2 |
| GSchnittkohl | BnaC04g44620.1D2 | BnaA04g24930.1D2 |
| GSchnittkohl | BnaC04g44640.1D2 | BnaA04g24950.1D2 |
| GSchnittkohl | BnaC04g44670.1D2 | BnaA04g24990.1D2 |
| GSchnittkohl | BnaC04g44680.1D2 | BnaA04g25000.1D2 |
| GSchnittkohl | BnaC04g44690.1D2 | BnaA04g25010.1D2 |
| GSchnittkohl | BnaC04g44710.1D2 | BnaA04g25030.1D2 |
| GSchnittkohl | BnaC04g44720.1D2 | BnaA04g25040.1D2 |
| GSchnittkohl | BnaC04g44730.1D2 | BnaA04g25050.1D2 |
| GSchnittkohl | BnaC04g44810.1D2 | BnaA04g25130.1D2 |
| GSchnittkohl | BnaC04g44860.1D2 | BnaA04g25150.1D2 |
| GSchnittkohl | BnaC04g44870.1D2 | BnaA04g25160.1D2 |
| GSchnittkohl | BnaC04g44910.1D2 | BnaA04g26070.1D2 |
| GSchnittkohl | BnaC04g44970.1D2 | BnaA04g25220.1D2 |
| GSchnittkohl | BnaC04g45010.1D2 | BnaA04g25290.1D2 |
| GSchnittkohl | BnaC04g45120.1D2 | BnaA04g25360.1D2 |
| GSchnittkohl | BnaC04g45210.1D2 | BnaA04g25480.1D2 |
| GSchnittkohl | BnaC04g45230.1D2 | BnaA04g25490.1D2 |
| GSchnittkohl | BnaC04g45240.1D2 | BnaA04g25500.1D2 |
| GSchnittkohl | BnaC04g45260.1D2 | BnaA04g25530.1D2 |
| GSchnittkohl | BnaC04g45310.1D2 | BnaA04g25650.1D2 |
| GSchnittkohl | BnaC04g45320.1D2 | BnaA04g25660.1D2 |



|              |                  |                  |
|--------------|------------------|------------------|
| GSchnittkohl | BnaC04g45350.1D2 | BnaA04g25680.1D2 |
| GSchnittkohl | BnaC04g45380.1D2 | BnaA04g25690.1D2 |
| GSchnittkohl | BnaC04g45480.1D2 | BnaA04g25790.1D2 |
| GSchnittkohl | BnaC04g45490.1D2 | BnaA04g25800.1D2 |
| GSchnittkohl | BnaC04g45500.1D2 | BnaA04g25810.1D2 |
| GSchnittkohl | BnaC04g45540.1D2 | BnaA04g25860.1D2 |
| GSchnittkohl | BnaC04g45550.1D2 | BnaA04g25870.1D2 |
| GSchnittkohl | BnaC04g45560.1D2 | BnaA04g25880.1D2 |
| GSchnittkohl | BnaC04g45600.1D2 | BnaA04g25920.1D2 |
| GSchnittkohl | BnaC04g45610.1D2 | BnaA04g25930.1D2 |
| GSchnittkohl | BnaC04g45620.1D2 | BnaA04g25940.1D2 |
| GSchnittkohl | BnaC04g45630.1D2 | BnaA04g25950.1D2 |
| GSchnittkohl | BnaC04g45650.1D2 | BnaA04g25960.1D2 |
| GSchnittkohl | BnaC04g45660.1D2 | BnaA04g25970.1D2 |
| GSchnittkohl | BnaC04g45680.1D2 | BnaA04g25990.1D2 |
| GSchnittkohl | BnaC04g45720.1D2 | BnaA04g26020.1D2 |
| GSchnittkohl | BnaC04g45750.1D2 | BnaA04g26040.1D2 |
| GSchnittkohl | BnaC04g45770.1D2 | BnaA04g26070.1D2 |
| GSchnittkohl | BnaC04g45780.1D2 | BnaA04g26080.1D2 |
| GSchnittkohl | BnaC04g45800.1D2 | BnaA04g26100.1D2 |
| GSchnittkohl | BnaC04g45860.1D2 | BnaA04g26690.1D2 |
| GSchnittkohl | BnaC04g45870.1D2 | BnaA04g26680.1D2 |
| GSchnittkohl | BnaC04g45890.1D2 | BnaA04g25540.1D2 |
| GSchnittkohl | BnaC04g45910.1D2 | BnaA04g25560.1D2 |
| GSchnittkohl | BnaC04g45990.1D2 | BnaA04g24110.1D2 |
| GSchnittkohl | BnaC04g46010.1D2 | BnaA04g24130.1D2 |
| GSchnittkohl | BnaC04g46040.1D2 | BnaA04g24180.1D2 |
| GSchnittkohl | BnaC04g46060.1D2 | BnaA04g24200.1D2 |
| GSchnittkohl | BnaC04g46110.1D2 | BnaA04g26580.1D2 |
| GSchnittkohl | BnaC04g46120.1D2 | BnaA04g26580.1D2 |
| GSchnittkohl | BnaC04g46130.1D2 | BnaA04g26570.1D2 |
| GSchnittkohl | BnaC04g46220.1D2 | BnaA04g26510.1D2 |
| GSchnittkohl | BnaC04g46320.1D2 | BnaA04g26460.1D2 |
| GSchnittkohl | BnaC04g46350.1D2 | BnaA04g26440.1D2 |
| GSchnittkohl | BnaC04g46420.1D2 | BnaA04g26360.1D2 |
| GSchnittkohl | BnaC04g46450.1D2 | BnaA04g26340.1D2 |
| GSchnittkohl | BnaC04g46490.1D2 | BnaA04g26310.1D2 |
| GSchnittkohl | BnaC04g46500.1D2 | BnaA04g26300.1D2 |
| GSchnittkohl | BnaC04g46510.1D2 | BnaA04g26290.1D2 |
| GSchnittkohl | BnaC04g46520.1D2 | BnaA04g26110.1D2 |
| GSchnittkohl | BnaC04g46550.1D2 | BnaA04g26270.1D2 |
| GSchnittkohl | BnaC04g46560.1D2 | BnaA04g26260.1D2 |
| GSchnittkohl | BnaC04g46570.1D2 | BnaA04g26250.1D2 |
| GSchnittkohl | BnaC04g46580.1D2 | BnaA04g26240.1D2 |
| CRY_1        | BnaC04g11680.1D2 | BnaA04g23580.1D2 |
| CRY_1        | BnaC04g11690.1D2 | BnaA04g23580.1D2 |
| CRY_1        | BnaC04g41680.1D2 | BnaA04g22370.1D2 |
| CRY_1        | BnaC04g42140.1D2 | BnaA04g23690.1D2 |
| CRY_1        | BnaC04g42170.1D2 | BnaA04g22590.1D2 |
| CRY_1        | BnaC04g42200.1D2 | BnaA04g22630.1D2 |
| CRY_1        | BnaC04g42230.1D2 | BnaA04g22660.1D2 |

|       |                  |                  |
|-------|------------------|------------------|
| CRY_1 | BnaC04g42530.1D2 | BnaA04g22100.1D2 |
| CRY_1 | BnaC04g42920.1D2 | BnaA04g23630.1D2 |
| CRY_1 | BnaC04g42990.1D2 | BnaA04g23090.1D2 |
| CRY_1 | BnaC04g43070.1D2 | BnaA04g23160.1D2 |
| CRY_1 | BnaC04g43280.1D2 | BnaA04g23330.1D2 |
| CRY_1 | BnaC04g43290.1D2 | BnaA04g23340.1D2 |
| CRY_1 | BnaC04g43340.1D2 | BnaA04g23390.1D2 |
| CRY_1 | BnaC04g43350.1D2 | BnaA04g23400.1D2 |
| CRY_1 | BnaC04g43540.1D2 | BnaA04g23560.1D2 |
| CRY_1 | BnaC04g43550.1D2 | BnaA04g23570.1D2 |
| CRY_1 | BnaC04g43570.1D2 | BnaA04g23590.1D2 |
| CRY_1 | BnaC04g43650.1D2 | BnaA04g23810.1D2 |
| CRY_1 | BnaC04g43660.1D2 | BnaA04g23820.1D2 |
| CRY_1 | BnaC04g43670.1D2 | BnaA04g23830.1D2 |
| CRY_1 | BnaC04g43680.1D2 | BnaA04g23840.1D2 |
| CRY_1 | BnaC04g43690.1D2 | BnaA04g23850.1D2 |
| CRY_1 | BnaC04g43700.1D2 | BnaA04g23860.1D2 |
| CRY_1 | BnaC04g43800.1D2 | BnaA04g23930.1D2 |
| CRY_1 | BnaC04g43880.1D2 | BnaA04g24020.1D2 |
| CRY_1 | BnaC04g44080.1D2 | BnaA04g24420.1D2 |
| CRY_1 | BnaC04g44090.1D2 | BnaA04g24430.1D2 |
| CRY_1 | BnaC04g44170.1D2 | BnaA04g24490.1D2 |
| CRY_1 | BnaC04g44210.1D2 | BnaA04g24520.1D2 |
| CRY_1 | BnaC04g44220.1D2 | BnaA04g24530.1D2 |
| CRY_1 | BnaC04g44230.1D2 | BnaA04g24540.1D2 |
| CRY_1 | BnaC04g44340.1D2 | BnaA04g24650.1D2 |
| CRY_1 | BnaC04g44350.1D2 | BnaA04g24660.1D2 |
| CRY_1 | BnaC04g44400.1D2 | BnaA04g24720.1D2 |
| CRY_1 | BnaC04g44460.1D2 | BnaA04g24770.1D2 |
| CRY_1 | BnaC04g44580.1D2 | BnaA04g24890.1D2 |
| CRY_1 | BnaC04g44730.1D2 | BnaA04g25050.1D2 |
| CRY_1 | BnaC04g44810.1D2 | BnaA04g25130.1D2 |
| CRY_1 | BnaC04g44910.1D2 | BnaA04g26070.1D2 |
| CRY_1 | BnaC04g44950.1D2 | BnaA04g25200.1D2 |
| CRY_1 | BnaC04g45010.1D2 | BnaA04g25290.1D2 |
| CRY_1 | BnaC04g45120.1D2 | BnaA04g25360.1D2 |
| CRY_1 | BnaC04g45150.1D2 | BnaA04g25410.1D2 |
| CRY_1 | BnaC04g45210.1D2 | BnaA04g25480.1D2 |
| CRY_1 | BnaC04g45240.1D2 | BnaA04g25500.1D2 |
| CRY_1 | BnaC04g45410.1D2 | BnaA04g25720.1D2 |
| CRY_1 | BnaC04g45480.1D2 | BnaA04g25790.1D2 |
| CRY_1 | BnaC04g45720.1D2 | BnaA04g26020.1D2 |
| CRY_1 | BnaC04g45800.1D2 | BnaA04g26100.1D2 |
| CRY_1 | BnaC04g45860.1D2 | BnaA04g26690.1D2 |
| CRY_1 | BnaC04g45950.1D2 | BnaA04g25060.1D2 |
| CRY_1 | BnaC04g45990.1D2 | BnaA04g24110.1D2 |
| CRY_1 | BnaC04g46010.1D2 | BnaA04g24130.1D2 |
| CRY_1 | BnaC04g46040.1D2 | BnaA04g24180.1D2 |
| CRY_1 | BnaC04g46060.1D2 | BnaA04g24200.1D2 |
| CRY_1 | BnaC04g46110.1D2 | BnaA04g26580.1D2 |
| CRY_1 | BnaC04g46130.1D2 | BnaA04g26570.1D2 |

|       |                  |                  |
|-------|------------------|------------------|
| CRY_1 | BnaC04g46220.1D2 | BnaA04g26510.1D2 |
| CRY_1 | BnaC04g46350.1D2 | BnaA04g26440.1D2 |
| CRY_1 | BnaC04g46420.1D2 | BnaA04g26360.1D2 |
| CRY_1 | BnaC04g46510.1D2 | BnaA04g26290.1D2 |
| CRY_1 | BnaC04g46520.1D2 | BnaA04g26110.1D2 |
| CRY_1 | BnaC04g46550.1D2 | BnaA04g26270.1D2 |

#### List of HE genes (C04 to A05)

| Accession    | Lost gene        | Duplicated HE gene |
|--------------|------------------|--------------------|
| GSchnittkohl | BnaC04g00020.1D2 | BnaA05g00160.1D2   |
| GSchnittkohl | BnaC04g00030.1D2 | BnaA05g00160.1D2   |
| GSchnittkohl | BnaC04g00100.1D2 | BnaA05g00230.1D2   |
| GSchnittkohl | BnaC04g00140.1D2 | BnaA05g00270.1D2   |
| GSchnittkohl | BnaC04g00180.1D2 | BnaA05g00320.1D2   |
| GSchnittkohl | BnaC04g00820.1D2 | BnaA05g00460.1D2   |
| GSchnittkohl | BnaC04g00830.1D2 | BnaA05g00480.1D2   |
| GSchnittkohl | BnaC04g00900.1D2 | BnaA05g00400.1D2   |
| GSchnittkohl | BnaC04g00910.1D2 | BnaA05g00390.1D2   |
| GSchnittkohl | BnaC04g18680.1D2 | BnaA05g31470.1D2   |
| GSchnittkohl | BnaC04g35580.1D2 | BnaA05g35050.1D2   |
| GSchnittkohl | BnaC04g44470.1D2 | BnaA05g03360.1D2   |
| GSchnittkohl | BnaC04g46040.1D2 | BnaA05g00180.1D2   |
| GSchnittkohl | BnaC04g46110.1D2 | BnaA05g00400.1D2   |
| CRY_1        | BnaC04g13740.1D2 | BnaA05g11840.1D2   |
| CRY_1        | BnaC04g35500.1D2 | BnaA05g34480.1D2   |
| CRY_1        | BnaC04g44910.1D2 | BnaA05g05330.1D2   |
| CRY_1        | BnaC04g46040.1D2 | BnaA05g00180.1D2   |
| CRY_1        | BnaC04g46520.1D2 | BnaA05g01060.1D2   |

#### List of HE genes (C05 to A05)

| Accession    | Lost gene        | Duplicated HE gene |
|--------------|------------------|--------------------|
| GSchnittkohl | BnaC05g36320.1D2 | BnaA05g27610.1D2   |
| GSchnittkohl | BnaC05g36360.1D2 | BnaA05g27660.1D2   |
| GSchnittkohl | BnaC05g36380.1D2 | BnaA05g27680.1D2   |
| GSchnittkohl | BnaC05g36400.1D2 | BnaA05g27700.1D2   |
| GSchnittkohl | BnaC05g36480.1D2 | BnaA05g27740.1D2   |
| GSchnittkohl | BnaC05g36520.1D2 | BnaA05g27800.1D2   |
| GSchnittkohl | BnaC05g36530.1D2 | BnaA05g27830.1D2   |
| GSchnittkohl | BnaC05g36560.1D2 | BnaA05g27870.1D2   |
| GSchnittkohl | BnaC05g37490.1D2 | BnaA05g28770.1D2   |
| GSchnittkohl | BnaC05g37540.1D2 | BnaA05g28820.1D2   |
| GSchnittkohl | BnaC05g37550.1D2 | BnaA05g28830.1D2   |
| GSchnittkohl | BnaC05g37570.1D2 | BnaA05g28850.1D2   |
| GSchnittkohl | BnaC05g37640.1D2 | BnaA05g28900.1D2   |
| GSchnittkohl | BnaC05g37840.1D2 | BnaA05g29010.1D2   |
| GSchnittkohl | BnaC05g37880.1D2 | BnaA05g29040.1D2   |
| GSchnittkohl | BnaC05g37910.1D2 | BnaA05g29070.1D2   |
| GSchnittkohl | BnaC05g37920.1D2 | BnaA05g29080.1D2   |
| GSchnittkohl | BnaC05g37930.1D2 | BnaA05g29090.1D2   |
| GSchnittkohl | BnaC05g37940.1D2 | BnaA05g29100.1D2   |
| GSchnittkohl | BnaC05g37950.1D2 | BnaA05g29110.1D2   |

|              |                  |                  |
|--------------|------------------|------------------|
| GSchnittkohl | BnaC05g37960.1D2 | BnaA05g29300.1D2 |
| GSchnittkohl | BnaC05g38000.1D2 | BnaA05g29260.1D2 |
| GSchnittkohl | BnaC05g38010.1D2 | BnaA05g29250.1D2 |
| GSchnittkohl | BnaC05g38040.1D2 | BnaA05g29220.1D2 |
| GSchnittkohl | BnaC05g38050.1D2 | BnaA05g29210.1D2 |
| GSchnittkohl | BnaC05g38070.1D2 | BnaA05g29190.1D2 |
| GSchnittkohl | BnaC05g38200.1D2 | BnaA05g29340.1D2 |
| GSchnittkohl | BnaC05g38210.1D2 | BnaA05g29350.1D2 |
| GSchnittkohl | BnaC05g38220.1D2 | BnaA05g29360.1D2 |
| GSchnittkohl | BnaC05g38250.1D2 | BnaA05g29400.1D2 |
| GSchnittkohl | BnaC05g38280.1D2 | BnaA05g29430.1D2 |
| GSchnittkohl | BnaC05g38300.1D2 | BnaA05g29440.1D2 |
| GSchnittkohl | BnaC05g38390.1D2 | BnaA05g29510.1D2 |
| GSchnittkohl | BnaC05g38500.1D2 | BnaA05g29630.1D2 |
| GSchnittkohl | BnaC05g38530.1D2 | BnaA05g29650.1D2 |
| GSchnittkohl | BnaC05g38680.1D2 | BnaA05g29780.1D2 |
| GSchnittkohl | BnaC05g38730.1D2 | BnaA05g29820.1D2 |
| GSchnittkohl | BnaC05g38730.1D2 | BnaA05g29830.1D2 |
| GSchnittkohl | BnaC05g38750.1D2 | BnaA05g30830.1D2 |
| GSchnittkohl | BnaC05g38760.1D2 | BnaA05g30840.1D2 |
| GSchnittkohl | BnaC05g38770.1D2 | BnaA05g30850.1D2 |
| GSchnittkohl | BnaC05g38790.1D2 | BnaA05g30870.1D2 |
| GSchnittkohl | BnaC05g38820.1D2 | BnaA05g30080.1D2 |
| GSchnittkohl | BnaC05g38840.1D2 | BnaA05g30100.1D2 |
| GSchnittkohl | BnaC05g38850.1D2 | BnaA05g30110.1D2 |
| GSchnittkohl | BnaC05g38880.1D2 | BnaA05g30290.1D2 |
| GSchnittkohl | BnaC05g38900.1D2 | BnaA05g30130.1D2 |
| GSchnittkohl | BnaC05g38930.1D2 | BnaA05g30160.1D2 |
| GSchnittkohl | BnaC05g38940.1D2 | BnaA05g30170.1D2 |
| GSchnittkohl | BnaC05g38950.1D2 | BnaA05g30180.1D2 |
| GSchnittkohl | BnaC05g38980.1D2 | BnaA05g30200.1D2 |
| GSchnittkohl | BnaC05g38990.1D2 | BnaA05g30210.1D2 |
| GSchnittkohl | BnaC05g39000.1D2 | BnaA05g30220.1D2 |
| GSchnittkohl | BnaC05g39090.1D2 | BnaA05g30300.1D2 |
| GSchnittkohl | BnaC05g39110.1D2 | BnaA05g30320.1D2 |
| GSchnittkohl | BnaC05g39140.1D2 | BnaA05g30350.1D2 |
| GSchnittkohl | BnaC05g39160.1D2 | BnaA05g30370.1D2 |
| GSchnittkohl | BnaC05g39170.1D2 | BnaA05g30380.1D2 |
| GSchnittkohl | BnaC05g39250.1D2 | BnaA05g30500.1D2 |
| GSchnittkohl | BnaC05g39270.1D2 | BnaA05g30520.1D2 |
| GSchnittkohl | BnaC05g39410.1D2 | BnaA05g30640.1D2 |
| GSchnittkohl | BnaC05g39470.1D2 | BnaA05g30700.1D2 |
| GSchnittkohl | BnaC05g39640.1D2 | BnaA05g30940.1D2 |
| GSchnittkohl | BnaC05g39710.1D2 | BnaA05g30410.1D2 |
| GSchnittkohl | BnaC05g39720.1D2 | BnaA05g30430.1D2 |
| GSchnittkohl | BnaC05g39730.1D2 | BnaA05g30070.1D2 |
| GSchnittkohl | BnaC05g39770.1D2 | BnaA05g30030.1D2 |
| GSchnittkohl | BnaC05g39780.1D2 | BnaA05g30020.1D2 |
| GSchnittkohl | BnaC05g39790.1D2 | BnaA05g30010.1D2 |
| GSchnittkohl | BnaC05g39810.1D2 | BnaA05g29950.1D2 |
| GSchnittkohl | BnaC05g39820.1D2 | BnaA05g29930.1D2 |

|              |                  |                  |
|--------------|------------------|------------------|
| GSchnittkohl | BnaC05g39840.1D2 | BnaA05g29910.1D2 |
| GSchnittkohl | BnaC05g39860.1D2 | BnaA05g29880.1D2 |
| GSchnittkohl | BnaC05g39870.1D2 | BnaA05g29870.1D2 |
| GSchnittkohl | BnaC05g39880.1D2 | BnaA05g29860.1D2 |
| GSchnittkohl | BnaC05g40140.1D2 | BnaA05g31130.1D2 |
| GSchnittkohl | BnaC05g40260.1D2 | BnaA05g31240.1D2 |
| GSchnittkohl | BnaC05g40320.1D2 | BnaA05g31300.1D2 |
| GSchnittkohl | BnaC05g40330.1D2 | BnaA05g31310.1D2 |
| GSchnittkohl | BnaC05g40380.1D2 | BnaA05g31370.1D2 |
| GSchnittkohl | BnaC05g40410.1D2 | BnaA05g31410.1D2 |
| GSchnittkohl | BnaC05g40430.1D2 | BnaA05g31420.1D2 |
| GSchnittkohl | BnaC05g40460.1D2 | BnaA05g31450.1D2 |
| GSchnittkohl | BnaC05g40470.1D2 | BnaA05g31460.1D2 |
| GSchnittkohl | BnaC05g40510.1D2 | BnaA05g31510.1D2 |
| GSchnittkohl | BnaC05g40520.1D2 | BnaA05g31520.1D2 |
| GSchnittkohl | BnaC05g40530.1D2 | BnaA05g31530.1D2 |
| GSchnittkohl | BnaC05g40570.1D2 | BnaA05g31560.1D2 |
| GSchnittkohl | BnaC05g40580.1D2 | BnaA05g31580.1D2 |
| GSchnittkohl | BnaC05g40590.1D2 | BnaA05g31590.1D2 |
| GSchnittkohl | BnaC05g40730.1D2 | BnaA05g31710.1D2 |
| GSchnittkohl | BnaC05g40740.1D2 | BnaA05g31730.1D2 |
| GSchnittkohl | BnaC05g40810.1D2 | BnaA05g31780.1D2 |
| GSchnittkohl | BnaC05g40820.1D2 | BnaA05g31790.1D2 |
| GSchnittkohl | BnaC05g40830.1D2 | BnaA05g31800.1D2 |
| GSchnittkohl | BnaC05g40840.1D2 | BnaA05g31810.1D2 |
| GSchnittkohl | BnaC05g40850.1D2 | BnaA05g31820.1D2 |
| GSchnittkohl | BnaC05g40870.1D2 | BnaA05g31830.1D2 |
| GSchnittkohl | BnaC05g40880.1D2 | BnaA05g31840.1D2 |
| GSchnittkohl | BnaC05g40890.1D2 | BnaA05g31880.1D2 |
| GSchnittkohl | BnaC05g40900.1D2 | BnaA05g31890.1D2 |
| GSchnittkohl | BnaC05g40930.1D2 | BnaA05g31920.1D2 |
| GSchnittkohl | BnaC05g40940.1D2 | BnaA05g31930.1D2 |
| GSchnittkohl | BnaC05g40950.1D2 | BnaA05g31940.1D2 |
| GSchnittkohl | BnaC05g40960.1D2 | BnaA05g31950.1D2 |
| GSchnittkohl | BnaC05g40970.1D2 | BnaA05g31960.1D2 |
| GSchnittkohl | BnaC05g41040.1D2 | BnaA05g32050.1D2 |
| GSchnittkohl | BnaC05g41050.1D2 | BnaA05g32080.1D2 |
| GSchnittkohl | BnaC05g41060.1D2 | BnaA05g32090.1D2 |
| GSchnittkohl | BnaC05g41070.1D2 | BnaA05g32100.1D2 |
| GSchnittkohl | BnaC05g41110.1D2 | BnaA05g32140.1D2 |
| GSchnittkohl | BnaC05g41130.1D2 | BnaA05g32150.1D2 |
| GSchnittkohl | BnaC05g41150.1D2 | BnaA05g32160.1D2 |
| GSchnittkohl | BnaC05g41160.1D2 | BnaA05g32170.1D2 |
| GSchnittkohl | BnaC05g41170.1D2 | BnaA05g32180.1D2 |
| GSchnittkohl | BnaC05g41220.1D2 | BnaA05g32240.1D2 |
| GSchnittkohl | BnaC05g41250.1D2 | BnaA05g32260.1D2 |
| GSchnittkohl | BnaC05g41280.1D2 | BnaA05g32290.1D2 |
| GSchnittkohl | BnaC05g41300.1D2 | BnaA05g32300.1D2 |
| GSchnittkohl | BnaC05g41330.1D2 | BnaA05g32330.1D2 |
| GSchnittkohl | BnaC05g41350.1D2 | BnaA05g32350.1D2 |
| GSchnittkohl | BnaC05g41370.1D2 | BnaA05g32370.1D2 |

|              |                  |                  |
|--------------|------------------|------------------|
| GSchnittkohl | BnaC05g41380.1D2 | BnaA05g32380.1D2 |
| GSchnittkohl | BnaC05g41410.1D2 | BnaA05g32410.1D2 |
| GSchnittkohl | BnaC05g41430.1D2 | BnaA05g32420.1D2 |
| GSchnittkohl | BnaC05g41470.1D2 | BnaA05g32460.1D2 |
| GSchnittkohl | BnaC05g41490.1D2 | BnaA05g32480.1D2 |
| GSchnittkohl | BnaC05g41500.1D2 | BnaA05g32490.1D2 |
| GSchnittkohl | BnaC05g41540.1D2 | BnaA05g32530.1D2 |
| GSchnittkohl | BnaC05g41550.1D2 | BnaA05g32540.1D2 |
| GSchnittkohl | BnaC05g41570.1D2 | BnaA05g32560.1D2 |
| GSchnittkohl | BnaC05g41580.1D2 | BnaA05g32570.1D2 |
| GSchnittkohl | BnaC05g41640.1D2 | BnaA05g32620.1D2 |
| GSchnittkohl | BnaC05g41660.1D2 | BnaA05g32640.1D2 |
| GSchnittkohl | BnaC05g41680.1D2 | BnaA05g32660.1D2 |
| GSchnittkohl | BnaC05g41690.1D2 | BnaA05g32670.1D2 |
| GSchnittkohl | BnaC05g41740.1D2 | BnaA05g32710.1D2 |
| GSchnittkohl | BnaC05g41760.1D2 | BnaA05g32730.1D2 |
| GSchnittkohl | BnaC05g41780.1D2 | BnaA05g32740.1D2 |
| GSchnittkohl | BnaC05g41890.1D2 | BnaA05g33530.1D2 |
| GSchnittkohl | BnaC05g41920.1D2 | BnaA05g33500.1D2 |
| GSchnittkohl | BnaC05g41940.1D2 | BnaA05g33490.1D2 |
| GSchnittkohl | BnaC05g42110.1D2 | BnaA05g33380.1D2 |
| GSchnittkohl | BnaC05g42120.1D2 | BnaA05g33370.1D2 |
| GSchnittkohl | BnaC05g42130.1D2 | BnaA05g33720.1D2 |
| GSchnittkohl | BnaC05g42190.1D2 | BnaA05g33780.1D2 |
| GSchnittkohl | BnaC05g42200.1D2 | BnaA05g33790.1D2 |
| GSchnittkohl | BnaC05g42260.1D2 | BnaA05g33860.1D2 |
| GSchnittkohl | BnaC05g42280.1D2 | BnaA05g33880.1D2 |
| GSchnittkohl | BnaC05g42340.1D2 | BnaA05g33970.1D2 |
| GSchnittkohl | BnaC05g42360.1D2 | BnaA05g33360.1D2 |
| GSchnittkohl | BnaC05g42380.1D2 | BnaA05g33350.1D2 |
| GSchnittkohl | BnaC05g42390.1D2 | BnaA05g33330.1D2 |
| GSchnittkohl | BnaC05g42420.1D2 | BnaA05g33310.1D2 |
| GSchnittkohl | BnaC05g42850.1D2 | BnaA05g34190.1D2 |
| GSchnittkohl | BnaC05g42860.1D2 | BnaA05g34180.1D2 |
| GSchnittkohl | BnaC05g42880.1D2 | BnaA05g34170.1D2 |
| GSchnittkohl | BnaC05g42930.1D2 | BnaA05g34120.1D2 |
| GSchnittkohl | BnaC05g42990.1D2 | BnaA05g34060.1D2 |
| GSchnittkohl | BnaC05g43000.1D2 | BnaA05g34050.1D2 |
| GSchnittkohl | BnaC05g43020.1D2 | BnaA05g34030.1D2 |
| GSchnittkohl | BnaC05g43040.1D2 | BnaA05g34020.1D2 |
| GSchnittkohl | BnaC05g43150.1D2 | BnaA05g32870.1D2 |
| GSchnittkohl | BnaC05g43160.1D2 | BnaA05g32870.1D2 |
| GSchnittkohl | BnaC05g43200.1D2 | BnaA05g32910.1D2 |
| GSchnittkohl | BnaC05g43230.1D2 | BnaA05g32930.1D2 |
| GSchnittkohl | BnaC05g43250.1D2 | BnaA05g32950.1D2 |
| GSchnittkohl | BnaC05g43270.1D2 | BnaA05g32970.1D2 |
| GSchnittkohl | BnaC05g43290.1D2 | BnaA05g33220.1D2 |
| GSchnittkohl | BnaC05g43310.1D2 | BnaA05g33200.1D2 |
| GSchnittkohl | BnaC05g43430.1D2 | BnaA05g33130.1D2 |
| GSchnittkohl | BnaC05g43500.1D2 | BnaA05g33070.1D2 |
| GSchnittkohl | BnaC05g43510.1D2 | BnaA05g33060.1D2 |

|              |                  |                  |
|--------------|------------------|------------------|
| GSchnittkohl | BnaC05g43520.1D2 | BnaA05g33050.1D2 |
| GSchnittkohl | BnaC05g43530.1D2 | BnaA05g33050.1D2 |
| GSchnittkohl | BnaC05g43570.1D2 | BnaA05g33020.1D2 |
| GSchnittkohl | BnaC05g43760.1D2 | BnaA05g34300.1D2 |
| GSchnittkohl | BnaC05g43770.1D2 | BnaA05g34310.1D2 |
| GSchnittkohl | BnaC05g43780.1D2 | BnaA05g34320.1D2 |
| GSchnittkohl | BnaC05g43790.1D2 | BnaA05g34330.1D2 |
| GSchnittkohl | BnaC05g43830.1D2 | BnaA05g34360.1D2 |
| GSchnittkohl | BnaC05g43850.1D2 | BnaA05g34390.1D2 |
| GSchnittkohl | BnaC05g43870.1D2 | BnaA05g34410.1D2 |
| GSchnittkohl | BnaC05g43920.1D2 | BnaA05g34440.1D2 |
| GSchnittkohl | BnaC05g43950.1D2 | BnaA05g34230.1D2 |
| GSchnittkohl | BnaC05g43960.1D2 | BnaA05g34240.1D2 |
| GSchnittkohl | BnaC05g43970.1D2 | BnaA05g34240.1D2 |
| GSchnittkohl | BnaC05g44090.1D2 | BnaA05g34960.1D2 |
| GSchnittkohl | BnaC05g44110.1D2 | BnaA05g34940.1D2 |
| GSchnittkohl | BnaC05g44160.1D2 | BnaA05g34880.1D2 |
| GSchnittkohl | BnaC05g44170.1D2 | BnaA05g34870.1D2 |
| GSchnittkohl | BnaC05g44210.1D2 | BnaA05g34830.1D2 |
| GSchnittkohl | BnaC05g44230.1D2 | BnaA05g35030.1D2 |
| GSchnittkohl | BnaC05g44250.1D2 | BnaA05g35010.1D2 |
| GSchnittkohl | BnaC05g44260.1D2 | BnaA05g34800.1D2 |
| GSchnittkohl | BnaC05g44280.1D2 | BnaA05g34780.1D2 |
| GSchnittkohl | BnaC05g44290.1D2 | BnaA05g34770.1D2 |
| GSchnittkohl | BnaC05g44300.1D2 | BnaA05g34760.1D2 |
| GSchnittkohl | BnaC05g44320.1D2 | BnaA05g34740.1D2 |
| GSchnittkohl | BnaC05g44360.1D2 | BnaA05g34700.1D2 |
| GSchnittkohl | BnaC05g44410.1D2 | BnaA05g34640.1D2 |
| GSchnittkohl | BnaC05g44460.1D2 | BnaA05g34590.1D2 |
| GSchnittkohl | BnaC05g44470.1D2 | BnaA05g34580.1D2 |
| GSchnittkohl | BnaC05g44490.1D2 | BnaA05g34570.1D2 |
| GSchnittkohl | BnaC05g44500.1D2 | BnaA05g34560.1D2 |
| R53          | BnaC05g35880.1D2 | BnaA05g27150.1D2 |
| R53          | BnaC05g35890.1D2 | BnaA05g27140.1D2 |
| R53          | BnaC05g35910.1D2 | BnaA05g27120.1D2 |
| R53          | BnaC05g35960.1D2 | BnaA05g27160.1D2 |
| R53          | BnaC05g35970.1D2 | BnaA05g27170.1D2 |
| R53          | BnaC05g36010.1D2 | BnaA05g27220.1D2 |
| R53          | BnaC05g36060.1D2 | BnaA05g27310.1D2 |
| R53          | BnaC05g36100.1D2 | BnaA05g27390.1D2 |
| R53          | BnaC05g36110.1D2 | BnaA05g27410.1D2 |
| R53          | BnaC05g36130.1D2 | BnaA05g27440.1D2 |
| R53          | BnaC05g36150.1D2 | BnaA05g27470.1D2 |
| R53          | BnaC05g36170.1D2 | BnaA05g27490.1D2 |
| R53          | BnaC05g36200.1D2 | BnaA05g27520.1D2 |
| R53          | BnaC05g36320.1D2 | BnaA05g27610.1D2 |
| R53          | BnaC05g36330.1D2 | BnaA05g27620.1D2 |
| R53          | BnaC05g36380.1D2 | BnaA05g27680.1D2 |
| R53          | BnaC05g36400.1D2 | BnaA05g27700.1D2 |
| R53          | BnaC05g36480.1D2 | BnaA05g27740.1D2 |
| R53          | BnaC05g36520.1D2 | BnaA05g27800.1D2 |

|     |                  |                  |
|-----|------------------|------------------|
| R53 | BnaC05g36530.1D2 | BnaA05g27830.1D2 |
| R53 | BnaC05g36560.1D2 | BnaA05g27870.1D2 |
| R53 | BnaC05g36590.1D2 | BnaA05g27900.1D2 |
| R53 | BnaC05g36600.1D2 | BnaA05g27910.1D2 |
| R53 | BnaC05g36620.1D2 | BnaA05g27930.1D2 |
| R53 | BnaC05g36630.1D2 | BnaA05g27930.1D2 |
| R53 | BnaC05g36650.1D2 | BnaA05g27950.1D2 |
| R53 | BnaC05g36660.1D2 | BnaA05g27970.1D2 |
| R53 | BnaC05g36670.1D2 | BnaA05g27980.1D2 |
| R53 | BnaC05g36700.1D2 | BnaA05g28020.1D2 |
| R53 | BnaC05g36710.1D2 | BnaA05g28030.1D2 |
| R53 | BnaC05g36730.1D2 | BnaA05g28050.1D2 |
| R53 | BnaC05g36770.1D2 | BnaA05g28080.1D2 |
| R53 | BnaC05g36780.1D2 | BnaA05g28090.1D2 |
| R53 | BnaC05g36790.1D2 | BnaA05g28100.1D2 |
| R53 | BnaC05g36800.1D2 | BnaA05g28110.1D2 |
| R53 | BnaC05g36830.1D2 | BnaA05g28140.1D2 |
| R53 | BnaC05g36850.1D2 | BnaA05g28170.1D2 |
| R53 | BnaC05g36900.1D2 | BnaA05g28190.1D2 |
| R53 | BnaC05g36930.1D2 | BnaA05g28300.1D2 |
| R53 | BnaC05g36940.1D2 | BnaA05g28300.1D2 |
| R53 | BnaC05g37010.1D2 | BnaA05g28380.1D2 |
| R53 | BnaC05g37040.1D2 | BnaA05g28390.1D2 |
| R53 | BnaC05g37050.1D2 | BnaA05g28400.1D2 |
| R53 | BnaC05g37160.1D2 | BnaA05g28480.1D2 |
| R53 | BnaC05g37180.1D2 | BnaA05g28500.1D2 |
| R53 | BnaC05g37220.1D2 | BnaA05g28550.1D2 |
| R53 | BnaC05g37230.1D2 | BnaA05g28560.1D2 |
| R53 | BnaC05g37240.1D2 | BnaA05g28570.1D2 |
| R53 | BnaC05g37260.1D2 | BnaA05g28590.1D2 |
| R53 | BnaC05g37270.1D2 | BnaA05g29130.1D2 |
| R53 | BnaC05g37290.1D2 | BnaA05g28600.1D2 |
| R53 | BnaC05g37380.1D2 | BnaA05g29120.1D2 |
| R53 | BnaC05g37410.1D2 | BnaA05g28720.1D2 |
| R53 | BnaC05g37440.1D2 | BnaA05g28740.1D2 |
| R53 | BnaC05g37550.1D2 | BnaA05g28830.1D2 |
| R53 | BnaC05g37640.1D2 | BnaA05g28900.1D2 |
| R53 | BnaC05g37650.1D2 | BnaA05g28910.1D2 |
| R53 | BnaC05g37730.1D2 | BnaA05g28920.1D2 |
| R53 | BnaC05g37740.1D2 | BnaA05g28930.1D2 |
| R53 | BnaC05g37900.1D2 | BnaA05g29060.1D2 |
| R53 | BnaC05g37940.1D2 | BnaA05g29100.1D2 |
| R53 | BnaC05g38010.1D2 | BnaA05g29250.1D2 |
| R53 | BnaC05g38050.1D2 | BnaA05g29210.1D2 |
| R53 | BnaC05g38070.1D2 | BnaA05g29190.1D2 |
| R53 | BnaC05g38170.1D2 | BnaA05g28230.1D2 |
| R53 | BnaC05g38180.1D2 | BnaA05g28220.1D2 |
| R53 | BnaC05g38200.1D2 | BnaA05g29340.1D2 |
| R53 | BnaC05g38210.1D2 | BnaA05g29350.1D2 |
| R53 | BnaC05g38220.1D2 | BnaA05g29360.1D2 |
| R53 | BnaC05g38230.1D2 | BnaA05g29370.1D2 |



|     |                  |                  |
|-----|------------------|------------------|
| R53 | BnaC05g38250.1D2 | BnaA05g29400.1D2 |
| R53 | BnaC05g38370.1D2 | BnaA05g29500.1D2 |
| R53 | BnaC05g38390.1D2 | BnaA05g29510.1D2 |
| R53 | BnaC05g38440.1D2 | BnaA05g29560.1D2 |
| R53 | BnaC05g38470.1D2 | BnaA05g29600.1D2 |
| R53 | BnaC05g38480.1D2 | BnaA05g29610.1D2 |
| R53 | BnaC05g38530.1D2 | BnaA05g29650.1D2 |
| R53 | BnaC05g38610.1D2 | BnaA05g29700.1D2 |
| R53 | BnaC05g38630.1D2 | BnaA05g29710.1D2 |
| R53 | BnaC05g38680.1D2 | BnaA05g29780.1D2 |
| R53 | BnaC05g38750.1D2 | BnaA05g30830.1D2 |
| R53 | BnaC05g38760.1D2 | BnaA05g30840.1D2 |
| R53 | BnaC05g38790.1D2 | BnaA05g30870.1D2 |
| R53 | BnaC05g38810.1D2 | BnaA05g30890.1D2 |
| R53 | BnaC05g38820.1D2 | BnaA05g30080.1D2 |
| R53 | BnaC05g38850.1D2 | BnaA05g30110.1D2 |
| R53 | BnaC05g38900.1D2 | BnaA05g30130.1D2 |
| R53 | BnaC05g38930.1D2 | BnaA05g30160.1D2 |
| R53 | BnaC05g38950.1D2 | BnaA05g30180.1D2 |
| R53 | BnaC05g39120.1D2 | BnaA05g30330.1D2 |
| R53 | BnaC05g39170.1D2 | BnaA05g30380.1D2 |
| R53 | BnaC05g39180.1D2 | BnaA05g30390.1D2 |
| R53 | BnaC05g39250.1D2 | BnaA05g30500.1D2 |
| R53 | BnaC05g39360.1D2 | BnaA05g30600.1D2 |
| R53 | BnaC05g39380.1D2 | BnaA05g30620.1D2 |
| R53 | BnaC05g39390.1D2 | BnaA05g30620.1D2 |
| R53 | BnaC05g39470.1D2 | BnaA05g30700.1D2 |
| R53 | BnaC05g39560.1D2 | BnaA05g30780.1D2 |
| R53 | BnaC05g39570.1D2 | BnaA05g30790.1D2 |
| R53 | BnaC05g39640.1D2 | BnaA05g30940.1D2 |
| R53 | BnaC05g39730.1D2 | BnaA05g30070.1D2 |
| R53 | BnaC05g39810.1D2 | BnaA05g29950.1D2 |
| R53 | BnaC05g39820.1D2 | BnaA05g29930.1D2 |
| R53 | BnaC05g39900.1D2 | BnaA05g31050.1D2 |
| R53 | BnaC05g40140.1D2 | BnaA05g31130.1D2 |
| R53 | BnaC05g40190.1D2 | BnaA05g31170.1D2 |
| R53 | BnaC05g40200.1D2 | BnaA05g31180.1D2 |
| R53 | BnaC05g40380.1D2 | BnaA05g31370.1D2 |
| R53 | BnaC05g40410.1D2 | BnaA05g31410.1D2 |
| R53 | BnaC05g40430.1D2 | BnaA05g31420.1D2 |
| R53 | BnaC05g40460.1D2 | BnaA05g31450.1D2 |
| R53 | BnaC05g40470.1D2 | BnaA05g31460.1D2 |
| R53 | BnaC05g40580.1D2 | BnaA05g31580.1D2 |
| R53 | BnaC05g40730.1D2 | BnaA05g31710.1D2 |
| R53 | BnaC05g40800.1D2 | BnaA05g31780.1D2 |
| R53 | BnaC05g40810.1D2 | BnaA05g31780.1D2 |
| R53 | BnaC05g40830.1D2 | BnaA05g31800.1D2 |
| R53 | BnaC05g40840.1D2 | BnaA05g31810.1D2 |
| R53 | BnaC05g40850.1D2 | BnaA05g31820.1D2 |
| R53 | BnaC05g40940.1D2 | BnaA05g31930.1D2 |
| R53 | BnaC05g40970.1D2 | BnaA05g31960.1D2 |

|     |                  |                  |
|-----|------------------|------------------|
| R53 | BnaC05g41050.1D2 | BnaA05g32080.1D2 |
| R53 | BnaC05g41060.1D2 | BnaA05g32090.1D2 |
| R53 | BnaC05g41070.1D2 | BnaA05g32100.1D2 |
| R53 | BnaC05g41090.1D2 | BnaA05g32110.1D2 |
| R53 | BnaC05g41110.1D2 | BnaA05g32140.1D2 |
| R53 | BnaC05g41130.1D2 | BnaA05g32150.1D2 |
| R53 | BnaC05g41150.1D2 | BnaA05g32160.1D2 |
| R53 | BnaC05g41160.1D2 | BnaA05g32170.1D2 |
| R53 | BnaC05g41170.1D2 | BnaA05g32180.1D2 |
| R53 | BnaC05g41220.1D2 | BnaA05g32240.1D2 |
| R53 | BnaC05g41250.1D2 | BnaA05g32260.1D2 |
| R53 | BnaC05g41370.1D2 | BnaA05g32370.1D2 |
| R53 | BnaC05g41380.1D2 | BnaA05g32380.1D2 |
| R53 | BnaC05g41550.1D2 | BnaA05g32540.1D2 |
| R53 | BnaC05g41590.1D2 | BnaA05g34690.1D2 |
| R53 | BnaC05g41660.1D2 | BnaA05g32640.1D2 |
| R53 | BnaC05g41680.1D2 | BnaA05g32660.1D2 |
| R53 | BnaC05g41690.1D2 | BnaA05g32670.1D2 |
| R53 | BnaC05g41740.1D2 | BnaA05g32710.1D2 |
| R53 | BnaC05g41760.1D2 | BnaA05g32730.1D2 |
| R53 | BnaC05g41890.1D2 | BnaA05g33530.1D2 |
| R53 | BnaC05g41940.1D2 | BnaA05g33490.1D2 |
| R53 | BnaC05g41950.1D2 | BnaA05g33480.1D2 |
| R53 | BnaC05g41960.1D2 | BnaA05g33470.1D2 |
| R53 | BnaC05g42130.1D2 | BnaA05g33720.1D2 |
| R53 | BnaC05g42260.1D2 | BnaA05g33860.1D2 |
| R53 | BnaC05g42280.1D2 | BnaA05g33880.1D2 |
| R53 | BnaC05g42360.1D2 | BnaA05g33360.1D2 |
| R53 | BnaC05g42380.1D2 | BnaA05g33350.1D2 |
| R53 | BnaC05g42390.1D2 | BnaA05g33330.1D2 |
| R53 | BnaC05g42490.1D2 | BnaA05g33270.1D2 |
| R53 | BnaC05g42510.1D2 | BnaA05g33250.1D2 |
| R53 | BnaC05g43060.1D2 | BnaA05g34000.1D2 |
| R53 | BnaC05g43140.1D2 | BnaA05g32870.1D2 |
| R53 | BnaC05g43150.1D2 | BnaA05g32870.1D2 |
| R53 | BnaC05g43160.1D2 | BnaA05g32870.1D2 |
| R53 | BnaC05g43180.1D2 | BnaA05g32890.1D2 |
| R53 | BnaC05g43230.1D2 | BnaA05g32930.1D2 |
| R53 | BnaC05g43250.1D2 | BnaA05g32950.1D2 |
| R53 | BnaC05g43270.1D2 | BnaA05g32970.1D2 |
| R53 | BnaC05g43280.1D2 | BnaA05g33240.1D2 |
| R53 | BnaC05g43310.1D2 | BnaA05g33200.1D2 |
| R53 | BnaC05g43340.1D2 | BnaA05g33190.1D2 |
| R53 | BnaC05g43350.1D2 | BnaA05g33180.1D2 |
| R53 | BnaC05g43360.1D2 | BnaA05g33170.1D2 |
| R53 | BnaC05g43430.1D2 | BnaA05g33130.1D2 |
| R53 | BnaC05g43490.1D2 | BnaA05g33080.1D2 |
| R53 | BnaC05g43570.1D2 | BnaA05g33020.1D2 |
| R53 | BnaC05g43700.1D2 | BnaA05g33630.1D2 |
| R53 | BnaC05g43760.1D2 | BnaA05g34300.1D2 |
| R53 | BnaC05g43770.1D2 | BnaA05g34310.1D2 |

|         |                  |                  |
|---------|------------------|------------------|
| R53     | BnaC05g43780.1D2 | BnaA05g34320.1D2 |
| R53     | BnaC05g43850.1D2 | BnaA05g34390.1D2 |
| R53     | BnaC05g44080.1D2 | BnaA05g34970.1D2 |
| R53     | BnaC05g44100.1D2 | BnaA05g34950.1D2 |
| R53     | BnaC05g44110.1D2 | BnaA05g34940.1D2 |
| R53     | BnaC05g44140.1D2 | BnaA05g34910.1D2 |
| R53     | BnaC05g44160.1D2 | BnaA05g34880.1D2 |
| R53     | BnaC05g44220.1D2 | BnaA05g34820.1D2 |
| R53     | BnaC05g44230.1D2 | BnaA05g35030.1D2 |
| R53     | BnaC05g44250.1D2 | BnaA05g35010.1D2 |
| R53     | BnaC05g44260.1D2 | BnaA05g34800.1D2 |
| R53     | BnaC05g44280.1D2 | BnaA05g34780.1D2 |
| R53     | BnaC05g44290.1D2 | BnaA05g34770.1D2 |
| R53     | BnaC05g44320.1D2 | BnaA05g34740.1D2 |
| R53     | BnaC05g44360.1D2 | BnaA05g34700.1D2 |
| R53     | BnaC05g44390.1D2 | BnaA05g34660.1D2 |
| R53     | BnaC05g44410.1D2 | BnaA05g34640.1D2 |
| R53     | BnaC05g44460.1D2 | BnaA05g34590.1D2 |
| R53     | BnaC05g44470.1D2 | BnaA05g34580.1D2 |
| R53     | BnaC05g44500.1D2 | BnaA05g34560.1D2 |
| RS_10_7 | BnaC05g29290.1D2 | BnaA05g19910.1D2 |
| RS_10_7 | BnaC05g32270.1D2 | BnaA05g23930.1D2 |
| RS_10_7 | BnaC05g32610.1D2 | BnaA05g24050.1D2 |
| RS_10_7 | BnaC05g32690.1D2 | BnaA05g24090.1D2 |
| RS_10_7 | BnaC05g32870.1D2 | BnaA05g26460.1D2 |
| RS_10_7 | BnaC05g32930.1D2 | BnaA05g24240.1D2 |
| RS_10_7 | BnaC05g32990.1D2 | BnaA05g24280.1D2 |
| RS_10_7 | BnaC05g33020.1D2 | BnaA05g24310.1D2 |
| RS_10_7 | BnaC05g33130.1D2 | BnaA05g24420.1D2 |
| RS_10_7 | BnaC05g33520.1D2 | BnaA05g25120.1D2 |
| RS_10_7 | BnaC05g33530.1D2 | BnaA05g25350.1D2 |
| RS_10_7 | BnaC05g33830.1D2 | BnaA05g24920.1D2 |
| RS_10_7 | BnaC05g33840.1D2 | BnaA05g24930.1D2 |
| RS_10_7 | BnaC05g34110.1D2 | BnaA05g25240.1D2 |
| RS_10_7 | BnaC05g34180.1D2 | BnaA05g25300.1D2 |
| RS_10_7 | BnaC05g34210.1D2 | BnaA05g25330.1D2 |
| RS_10_7 | BnaC05g34340.1D2 | BnaA05g25490.1D2 |
| RS_10_7 | BnaC05g34340.1D2 | BnaA05g25520.1D2 |
| RS_10_7 | BnaC05g34470.1D2 | BnaA05g25610.1D2 |
| RS_10_7 | BnaC05g34640.1D2 | BnaA05g25720.1D2 |
| RS_10_7 | BnaC05g34740.1D2 | BnaA05g25790.1D2 |
| RS_10_7 | BnaC05g34820.1D2 | BnaA05g25870.1D2 |
| RS_10_7 | BnaC05g34960.1D2 | BnaA05g26110.1D2 |
| RS_10_7 | BnaC05g35110.1D2 | BnaA05g26210.1D2 |
| RS_10_7 | BnaC05g35260.1D2 | BnaA05g26360.1D2 |
| RS_10_7 | BnaC05g35940.1D2 | BnaA05g27100.1D2 |
| RS_10_7 | BnaC05g36010.1D2 | BnaA05g27220.1D2 |
| RS_10_7 | BnaC05g36280.1D2 | BnaA05g27580.1D2 |
| RS_10_7 | BnaC05g36590.1D2 | BnaA05g27900.1D2 |
| RS_10_7 | BnaC05g36710.1D2 | BnaA05g28030.1D2 |
| RS_10_7 | BnaC05g36780.1D2 | BnaA05g28090.1D2 |

|         |                  |                  |
|---------|------------------|------------------|
| RS_10_7 | BnaC05g36830.1D2 | BnaA05g28140.1D2 |
| RS_10_7 | BnaC05g36900.1D2 | BnaA05g28190.1D2 |
| RS_10_7 | BnaC05g36940.1D2 | BnaA05g28300.1D2 |
| RS_10_7 | BnaC05g36970.1D2 | BnaA05g28330.1D2 |
| RS_10_7 | BnaC05g37080.1D2 | BnaA05g28430.1D2 |
| RS_10_7 | BnaC05g37640.1D2 | BnaA05g28900.1D2 |
| RS_10_7 | BnaC05g37940.1D2 | BnaA05g29100.1D2 |
| RS_10_7 | BnaC05g38000.1D2 | BnaA05g29260.1D2 |
| RS_10_7 | BnaC05g38050.1D2 | BnaA05g29210.1D2 |
| RS_10_7 | BnaC05g38390.1D2 | BnaA05g29510.1D2 |
| RS_10_7 | BnaC05g38410.1D2 | BnaA05g29530.1D2 |
| RS_10_7 | BnaC05g38610.1D2 | BnaA05g29700.1D2 |
| RS_10_7 | BnaC05g38750.1D2 | BnaA05g30830.1D2 |
| RS_10_7 | BnaC05g38760.1D2 | BnaA05g30840.1D2 |
| RS_10_7 | BnaC05g38980.1D2 | BnaA05g30200.1D2 |
| RS_10_7 | BnaC05g39270.1D2 | BnaA05g30520.1D2 |
| RS_10_7 | BnaC05g39290.1D2 | BnaA05g30530.1D2 |
| RS_10_7 | BnaC05g39380.1D2 | BnaA05g30620.1D2 |
| RS_10_7 | BnaC05g39390.1D2 | BnaA05g30620.1D2 |
| RS_10_7 | BnaC05g39410.1D2 | BnaA05g30640.1D2 |
| RS_10_7 | BnaC05g39600.1D2 | BnaA05g30800.1D2 |
| RS_10_7 | BnaC05g39640.1D2 | BnaA05g30940.1D2 |
| RS_10_7 | BnaC05g39730.1D2 | BnaA05g30070.1D2 |
| RS_10_7 | BnaC05g39900.1D2 | BnaA05g31050.1D2 |
| RS_10_7 | BnaC05g40190.1D2 | BnaA05g31170.1D2 |
| RS_10_7 | BnaC05g40520.1D2 | BnaA05g31520.1D2 |
| RS_10_7 | BnaC05g40800.1D2 | BnaA05g31780.1D2 |
| RS_10_7 | BnaC05g40840.1D2 | BnaA05g31810.1D2 |
| RS_10_7 | BnaC05g40870.1D2 | BnaA05g31830.1D2 |
| RS_10_7 | BnaC05g40880.1D2 | BnaA05g31840.1D2 |
| RS_10_7 | BnaC05g41090.1D2 | BnaA05g32110.1D2 |
| RS_10_7 | BnaC05g41110.1D2 | BnaA05g32140.1D2 |
| RS_10_7 | BnaC05g41550.1D2 | BnaA05g32540.1D2 |
| RS_10_7 | BnaC05g41760.1D2 | BnaA05g32730.1D2 |
| RS_10_7 | BnaC05g41950.1D2 | BnaA05g33480.1D2 |
| RS_10_7 | BnaC05g42120.1D2 | BnaA05g33370.1D2 |
| RS_10_7 | BnaC05g42200.1D2 | BnaA05g33790.1D2 |
| RS_10_7 | BnaC05g42260.1D2 | BnaA05g33860.1D2 |
| RS_10_7 | BnaC05g42360.1D2 | BnaA05g33360.1D2 |
| RS_10_7 | BnaC05g42930.1D2 | BnaA05g34120.1D2 |
| RS_10_7 | BnaC05g43060.1D2 | BnaA05g34000.1D2 |
| RS_10_7 | BnaC05g43140.1D2 | BnaA05g32870.1D2 |
| RS_10_7 | BnaC05g43150.1D2 | BnaA05g32870.1D2 |
| RS_10_7 | BnaC05g43270.1D2 | BnaA05g32970.1D2 |
| RS_10_7 | BnaC05g43310.1D2 | BnaA05g33200.1D2 |
| RS_10_7 | BnaC05g43340.1D2 | BnaA05g33190.1D2 |
| RS_10_7 | BnaC05g43520.1D2 | BnaA05g33050.1D2 |
| RS_10_7 | BnaC05g43780.1D2 | BnaA05g34320.1D2 |
| RS_10_7 | BnaC05g44090.1D2 | BnaA05g34960.1D2 |
| RS_10_7 | BnaC05g44160.1D2 | BnaA05g34880.1D2 |
| RS_10_7 | BnaC05g44230.1D2 | BnaA05g35030.1D2 |

|         |                  |                  |
|---------|------------------|------------------|
| RS_10_7 | BnaC05g44260.1D2 | BnaA05g34800.1D2 |
| RS_10_7 | BnaC05g44320.1D2 | BnaA05g34740.1D2 |
| RS_10_7 | BnaC05g44360.1D2 | BnaA05g34700.1D2 |
| RS_10_7 | BnaC05g44410.1D2 | BnaA05g34640.1D2 |
| RS_10_7 | BnaC05g44460.1D2 | BnaA05g34590.1D2 |
| RS_10_7 | BnaC05g44470.1D2 | BnaA05g34580.1D2 |

#### List of HE genes (C06 to A07)

| Accession | Lost gene        | Duplicated HE gene |
|-----------|------------------|--------------------|
| H149      | BnaC06g26380.1D2 | BnaA07g33570.1D2   |
| H149      | BnaC06g30890.1D2 | BnaA07g35520.1D2   |
| H149      | BnaC06g30930.1D2 | BnaA07g35440.1D2   |
| H149      | BnaC06g31070.1D2 | BnaA07g31570.1D2   |
| H149      | BnaC06g31140.1D2 | BnaA07g31690.1D2   |
| H149      | BnaC06g31170.1D2 | BnaA07g31740.1D2   |
| H149      | BnaC06g31190.1D2 | BnaA07g31750.1D2   |
| H149      | BnaC06g31210.1D2 | BnaA07g31770.1D2   |
| H149      | BnaC06g31230.1D2 | BnaA07g31780.1D2   |
| H149      | BnaC06g31720.1D2 | BnaA07g29860.1D2   |
| H149      | BnaC06g31900.1D2 | BnaA07g32080.1D2   |
| H149      | BnaC06g31950.1D2 | BnaA07g32130.1D2   |
| H149      | BnaC06g31960.1D2 | BnaA07g32140.1D2   |
| H149      | BnaC06g32010.1D2 | BnaA07g32200.1D2   |
| H149      | BnaC06g32070.1D2 | BnaA07g32240.1D2   |
| H149      | BnaC06g32270.1D2 | BnaA07g32440.1D2   |
| H149      | BnaC06g32430.1D2 | BnaA07g32600.1D2   |
| H149      | BnaC06g32440.1D2 | BnaA07g32600.1D2   |
| H149      | BnaC06g32490.1D2 | BnaA07g32650.1D2   |
| H149      | BnaC06g32590.1D2 | BnaA07g32770.1D2   |
| H149      | BnaC06g32620.1D2 | BnaA07g32790.1D2   |
| H149      | BnaC06g32680.1D2 | BnaA07g32850.1D2   |
| H149      | BnaC06g32840.1D2 | BnaA07g32980.1D2   |
| H149      | BnaC06g32850.1D2 | BnaA07g32990.1D2   |
| H149      | BnaC06g33010.1D2 | BnaA07g33110.1D2   |
| H149      | BnaC06g33330.1D2 | BnaA07g33410.1D2   |
| H149      | BnaC06g33390.1D2 | BnaA07g33460.1D2   |
| H149      | BnaC06g33430.1D2 | BnaA07g33490.1D2   |
| H149      | BnaC06g33440.1D2 | BnaA07g33500.1D2   |
| H149      | BnaC06g33480.1D2 | BnaA07g33540.1D2   |
| H149      | BnaC06g33500.1D2 | BnaA07g35230.1D2   |
| H149      | BnaC06g33510.1D2 | BnaA07g35220.1D2   |
| H149      | BnaC06g33540.1D2 | BnaA07g35170.1D2   |
| H149      | BnaC06g33550.1D2 | BnaA07g35150.1D2   |
| H149      | BnaC06g33570.1D2 | BnaA07g35130.1D2   |
| H149      | BnaC06g33650.1D2 | BnaA07g33570.1D2   |
| H149      | BnaC06g33720.1D2 | BnaA07g33650.1D2   |
| H149      | BnaC06g33740.1D2 | BnaA07g33670.1D2   |
| H149      | BnaC06g33790.1D2 | BnaA07g33700.1D2   |
| H149      | BnaC06g33940.1D2 | BnaA07g33860.1D2   |
| H149      | BnaC06g33950.1D2 | BnaA07g33870.1D2   |
| H149      | BnaC06g34000.1D2 | BnaA07g35250.1D2   |

|        |                  |                  |
|--------|------------------|------------------|
| H149   | BnaC06g34010.1D2 | BnaA07g33920.1D2 |
| H149   | BnaC06g34020.1D2 | BnaA07g33930.1D2 |
| H149   | BnaC06g34040.1D2 | BnaA07g33950.1D2 |
| H149   | BnaC06g34060.1D2 | BnaA07g33970.1D2 |
| H149   | BnaC06g34120.1D2 | BnaA07g34000.1D2 |
| H149   | BnaC06g34240.1D2 | BnaA07g34120.1D2 |
| H149   | BnaC06g34310.1D2 | BnaA07g34200.1D2 |
| H149   | BnaC06g34390.1D2 | BnaA07g34290.1D2 |
| H149   | BnaC06g34430.1D2 | BnaA07g34330.1D2 |
| H149   | BnaC06g34440.1D2 | BnaA07g34340.1D2 |
| H149   | BnaC06g34510.1D2 | BnaA07g34420.1D2 |
| H149   | BnaC06g34540.1D2 | BnaA07g34450.1D2 |
| H149   | BnaC06g34630.1D2 | BnaA07g34540.1D2 |
| H149   | BnaC06g34830.1D2 | BnaA07g34700.1D2 |
| H149   | BnaC06g34900.1D2 | BnaA07g34790.1D2 |
| H149   | BnaC06g34980.1D2 | BnaA07g34850.1D2 |
| H149   | BnaC06g34990.1D2 | BnaA07g34860.1D2 |
| H149   | BnaC06g35000.1D2 | BnaA07g34870.1D2 |
| H149   | BnaC06g35040.1D2 | BnaA07g34900.1D2 |
| H149   | BnaC06g35290.1D2 | BnaA07g35020.1D2 |
| H149   | BnaC06g35340.1D2 | BnaA07g35050.1D2 |
| H149   | BnaC06g35360.1D2 | BnaA07g35080.1D2 |
| RS_7_6 | BnaC06g31430.1D2 | BnaA07g31940.1D2 |
| RS_7_6 | BnaC06g31450.1D2 | BnaA07g31960.1D2 |
| RS_7_6 | BnaC06g31460.1D2 | BnaA07g31970.1D2 |
| RS_7_6 | BnaC06g31470.1D2 | BnaA07g31980.1D2 |
| RS_7_6 | BnaC06g31720.1D2 | BnaA07g29860.1D2 |
| RS_7_6 | BnaC06g31980.1D2 | BnaA07g32160.1D2 |
| RS_7_6 | BnaC06g32010.1D2 | BnaA07g32200.1D2 |
| RS_7_6 | BnaC06g32040.1D2 | BnaA07g32200.1D2 |
| RS_7_6 | BnaC06g32260.1D2 | BnaA07g32420.1D2 |
| RS_7_6 | BnaC06g32270.1D2 | BnaA07g32440.1D2 |
| RS_7_6 | BnaC06g32430.1D2 | BnaA07g32600.1D2 |
| RS_7_6 | BnaC06g32440.1D2 | BnaA07g32600.1D2 |
| RS_7_6 | BnaC06g32490.1D2 | BnaA07g32650.1D2 |
| RS_7_6 | BnaC06g32560.1D2 | BnaA07g32730.1D2 |
| RS_7_6 | BnaC06g32590.1D2 | BnaA07g32770.1D2 |
| RS_7_6 | BnaC06g32620.1D2 | BnaA07g32790.1D2 |
| RS_7_6 | BnaC06g32680.1D2 | BnaA07g32850.1D2 |
| RS_7_6 | BnaC06g32770.1D2 | BnaA07g32920.1D2 |
| RS_7_6 | BnaC06g32840.1D2 | BnaA07g32980.1D2 |
| RS_7_6 | BnaC06g32850.1D2 | BnaA07g32990.1D2 |
| RS_7_6 | BnaC06g33010.1D2 | BnaA07g33110.1D2 |
| RS_7_6 | BnaC06g33260.1D2 | BnaA07g33360.1D2 |
| RS_7_6 | BnaC06g33330.1D2 | BnaA07g33410.1D2 |
| RS_7_6 | BnaC06g33340.1D2 | BnaA07g33420.1D2 |
| RS_7_6 | BnaC06g33480.1D2 | BnaA07g33540.1D2 |
| RS_7_6 | BnaC06g33500.1D2 | BnaA07g35230.1D2 |
| RS_7_6 | BnaC06g33510.1D2 | BnaA07g35220.1D2 |
| RS_7_6 | BnaC06g33540.1D2 | BnaA07g35170.1D2 |
| RS_7_6 | BnaC06g33550.1D2 | BnaA07g35150.1D2 |

RS\_7\_6

BnaC06g33570.1D2

BnaA07g35130.1D2

**List of HE genes (C08 to A09)**

| <b>Accession</b> | <b>Lost gene</b> | <b>Duplicated HE gene</b> |
|------------------|------------------|---------------------------|
| Chuosenshu       | BnaC08g28950.1D2 | BnaA09g40970.1D2          |
| Chuosenshu       | BnaC08g38700.1D2 | BnaA09g52150.1D2          |
| Chuosenshu       | BnaC08g38780.1D2 | BnaA09g52080.1D2          |
| Chuosenshu       | BnaC08g38820.1D2 | BnaA09g52040.1D2          |
| Chuosenshu       | BnaC08g38860.1D2 | BnaA09g52000.1D2          |
| Chuosenshu       | BnaC08g38870.1D2 | BnaA09g51990.1D2          |
| Chuosenshu       | BnaC08g38880.1D2 | BnaA09g51980.1D2          |
| Chuosenshu       | BnaC08g38890.1D2 | BnaA09g51970.1D2          |
| Chuosenshu       | BnaC08g38910.1D2 | BnaA09g51950.1D2          |
| Chuosenshu       | BnaC08g39040.1D2 | BnaA09g51240.1D2          |
| Chuosenshu       | BnaC08g39050.1D2 | BnaA09g51230.1D2          |
| Chuosenshu       | BnaC08g39090.1D2 | BnaA09g51170.1D2          |
| Chuosenshu       | BnaC08g39240.1D2 | BnaA09g51540.1D2          |
| Chuosenshu       | BnaC08g39260.1D2 | BnaA09g51520.1D2          |
| Chuosenshu       | BnaC08g39270.1D2 | BnaA09g51510.1D2          |
| Chuosenshu       | BnaC08g39300.1D2 | BnaA09g51130.1D2          |
| Chuosenshu       | BnaC08g39320.1D2 | BnaA09g51120.1D2          |
| Chuosenshu       | BnaC08g39340.1D2 | BnaA09g51110.1D2          |
| Chuosenshu       | BnaC08g39380.1D2 | BnaA09g51070.1D2          |
| Chuosenshu       | BnaC08g39410.1D2 | BnaA09g51040.1D2          |
| Chuosenshu       | BnaC08g39420.1D2 | BnaA09g51030.1D2          |
| Chuosenshu       | BnaC08g39480.1D2 | BnaA09g50970.1D2          |
| Chuosenshu       | BnaC08g39510.1D2 | BnaA09g50940.1D2          |
| Chuosenshu       | BnaC08g39540.1D2 | BnaA09g50920.1D2          |
| Chuosenshu       | BnaC08g39570.1D2 | BnaA09g50900.1D2          |
| Chuosenshu       | BnaC08g39580.1D2 | BnaA09g50870.1D2          |
| Chuosenshu       | BnaC08g39590.1D2 | BnaA09g50870.1D2          |
| Chuosenshu       | BnaC08g39620.1D2 | BnaA09g50820.1D2          |
| Chuosenshu       | BnaC08g39680.1D2 | BnaA09g50790.1D2          |
| Chuosenshu       | BnaC08g39690.1D2 | BnaA09g50780.1D2          |
| Chuosenshu       | BnaC08g39700.1D2 | BnaA09g50770.1D2          |
| Chuosenshu       | BnaC08g39710.1D2 | BnaA09g50760.1D2          |
| Chuosenshu       | BnaC08g39720.1D2 | BnaA09g50750.1D2          |
| Chuosenshu       | BnaC08g39770.1D2 | BnaA09g50720.1D2          |
| Chuosenshu       | BnaC08g39810.1D2 | BnaA09g50680.1D2          |
| Chuosenshu       | BnaC08g39820.1D2 | BnaA09g50670.1D2          |
| Chuosenshu       | BnaC08g39890.1D2 | BnaA09g50630.1D2          |
| Chuosenshu       | BnaC08g39900.1D2 | BnaA09g50620.1D2          |
| Chuosenshu       | BnaC08g39930.1D2 | BnaA09g50590.1D2          |
| Chuosenshu       | BnaC08g39970.1D2 | BnaA09g50560.1D2          |
| Chuosenshu       | BnaC08g39980.1D2 | BnaA09g50550.1D2          |
| Chuosenshu       | BnaC08g39990.1D2 | BnaA09g50540.1D2          |
| Chuosenshu       | BnaC08g40080.1D2 | BnaA09g51630.1D2          |
| Chuosenshu       | BnaC08g40100.1D2 | BnaA09g51640.1D2          |
| Chuosenshu       | BnaC08g40110.1D2 | BnaA09g51640.1D2          |
| Chuosenshu       | BnaC08g40130.1D2 | BnaA09g51650.1D2          |
| Chuosenshu       | BnaC08g40140.1D2 | BnaA09g51650.1D2          |

|           |                  |                  |
|-----------|------------------|------------------|
| Chuosenhu | BnaC08g40180.1D2 | BnaA09g51690.1D2 |
| Chuosenhu | BnaC08g40190.1D2 | BnaA09g51700.1D2 |
| Chuosenhu | BnaC08g40260.1D2 | BnaA09g50390.1D2 |
| Chuosenhu | BnaC08g40280.1D2 | BnaA09g50370.1D2 |
| Chuosenhu | BnaC08g40300.1D2 | BnaA09g50360.1D2 |
| Chuosenhu | BnaC08g40320.1D2 | BnaA09g50360.1D2 |
| Chuosenhu | BnaC08g40330.1D2 | BnaA09g50340.1D2 |
| Chuosenhu | BnaC08g40340.1D2 | BnaA09g50330.1D2 |
| Chuosenhu | BnaC08g40360.1D2 | BnaA09g50320.1D2 |
| Chuosenhu | BnaC08g40370.1D2 | BnaA09g50310.1D2 |
| Chuosenhu | BnaC08g40470.1D2 | BnaA09g51770.1D2 |
| Chuosenhu | BnaC08g40490.1D2 | BnaA09g51800.1D2 |
| Chuosenhu | BnaC08g40500.1D2 | BnaA09g51810.1D2 |
| Chuosenhu | BnaC08g40520.1D2 | BnaA09g51820.1D2 |
| Chuosenhu | BnaC08g40560.1D2 | BnaA09g51860.1D2 |
| Chuosenhu | BnaC08g40710.1D2 | BnaA09g51140.1D2 |
| Chuosenhu | BnaC08g40720.1D2 | BnaA09g52420.1D2 |
| Chuosenhu | BnaC08g40760.1D2 | BnaA09g51450.1D2 |
| Chuosenhu | BnaC08g40880.1D2 | BnaA09g52190.1D2 |
| Chuosenhu | BnaC08g40900.1D2 | BnaA09g52210.1D2 |
| Chuosenhu | BnaC08g40910.1D2 | BnaA09g52220.1D2 |
| Chuosenhu | BnaC08g40920.1D2 | BnaA09g52230.1D2 |
| Chuosenhu | BnaC08g40940.1D2 | BnaA09g52250.1D2 |
| Chuosenhu | BnaC08g41050.1D2 | BnaA09g52310.1D2 |
| Chuosenhu | BnaC08g41080.1D2 | BnaA09g52350.1D2 |
| Chuosenhu | BnaC08g41090.1D2 | BnaA09g52360.1D2 |
| Chuosenhu | BnaC08g41100.1D2 | BnaA09g52370.1D2 |
| Chuosenhu | BnaC08g41120.1D2 | BnaA09g52390.1D2 |
| Chuosenhu | BnaC08g41190.1D2 | BnaA09g52460.1D2 |
| Chuosenhu | BnaC08g41210.1D2 | BnaA09g52470.1D2 |
| Chuosenhu | BnaC08g41240.1D2 | BnaA09g52520.1D2 |
| Chuosenhu | BnaC08g41260.1D2 | BnaA09g52540.1D2 |
| Chuosenhu | BnaC08g41400.1D2 | BnaA09g51750.1D2 |
| DH5       | BnaC08g35730.1D2 | BnaA09g47460.1D2 |
| DH5       | BnaC08g35780.1D2 | BnaA09g47520.1D2 |
| DH5       | BnaC08g35800.1D2 | BnaA09g47540.1D2 |
| DH5       | BnaC08g35830.1D2 | BnaA09g47570.1D2 |
| DH5       | BnaC08g35840.1D2 | BnaA09g47570.1D2 |
| DH5       | BnaC08g35930.1D2 | BnaA09g47690.1D2 |
| DH5       | BnaC08g35960.1D2 | BnaA09g47720.1D2 |
| DH5       | BnaC08g35970.1D2 | BnaA09g47730.1D2 |
| DH5       | BnaC08g36140.1D2 | BnaA09g47890.1D2 |
| DH5       | BnaC08g36150.1D2 | BnaA09g47890.1D2 |
| DH5       | BnaC08g36170.1D2 | BnaA09g47900.1D2 |
| DH5       | BnaC08g36190.1D2 | BnaA09g47920.1D2 |
| DH5       | BnaC08g36210.1D2 | BnaA09g47940.1D2 |
| DH5       | BnaC08g36280.1D2 | BnaA09g48000.1D2 |
| DH5       | BnaC08g36300.1D2 | BnaA09g48020.1D2 |
| DH5       | BnaC08g36340.1D2 | BnaA09g48070.1D2 |
| DH5       | BnaC08g36400.1D2 | BnaA09g48140.1D2 |
| DH5       | BnaC08g36420.1D2 | BnaA09g48160.1D2 |



|     |                  |                  |
|-----|------------------|------------------|
| DH5 | BnaC08g36440.1D2 | BnaA09g48180.1D2 |
| DH5 | BnaC08g36480.1D2 | BnaA09g48230.1D2 |
| DH5 | BnaC08g36490.1D2 | BnaA09g48240.1D2 |
| DH5 | BnaC08g36500.1D2 | BnaA09g48260.1D2 |
| DH5 | BnaC08g36510.1D2 | BnaA09g48270.1D2 |
| DH5 | BnaC08g36520.1D2 | BnaA09g48280.1D2 |
| DH5 | BnaC08g36540.1D2 | BnaA09g48300.1D2 |
| DH5 | BnaC08g36600.1D2 | BnaA09g48370.1D2 |
| DH5 | BnaC08g36620.1D2 | BnaA09g48390.1D2 |
| DH5 | BnaC08g36690.1D2 | BnaA09g48470.1D2 |
| DH5 | BnaC08g36800.1D2 | BnaA09g48480.1D2 |
| DH5 | BnaC08g36830.1D2 | BnaA09g48500.1D2 |
| DH5 | BnaC08g36860.1D2 | BnaA09g48530.1D2 |
| DH5 | BnaC08g36870.1D2 | BnaA09g48540.1D2 |
| DH5 | BnaC08g36920.1D2 | BnaA09g48580.1D2 |
| DH5 | BnaC08g36930.1D2 | BnaA09g48590.1D2 |
| DH5 | BnaC08g36980.1D2 | BnaA09g49120.1D2 |
| DH5 | BnaC08g37000.1D2 | BnaA09g48630.1D2 |
| DH5 | BnaC08g37030.1D2 | BnaA09g48640.1D2 |
| DH5 | BnaC08g37170.1D2 | BnaA09g48700.1D2 |
| DH5 | BnaC08g37220.1D2 | BnaA09g48740.1D2 |
| DH5 | BnaC08g37230.1D2 | BnaA09g48750.1D2 |
| DH5 | BnaC08g37300.1D2 | BnaA09g48980.1D2 |
| DH5 | BnaC08g37330.1D2 | BnaA09g48940.1D2 |
| DH5 | BnaC08g37340.1D2 | BnaA09g48930.1D2 |
| DH5 | BnaC08g37350.1D2 | BnaA09g48920.1D2 |
| DH5 | BnaC08g37360.1D2 | BnaA09g48910.1D2 |
| DH5 | BnaC08g37400.1D2 | BnaA09g48870.1D2 |
| DH5 | BnaC08g37410.1D2 | BnaA09g48860.1D2 |
| DH5 | BnaC08g37680.1D2 | BnaA09g51330.1D2 |
| DH5 | BnaC08g37720.1D2 | BnaA09g51290.1D2 |
| DH5 | BnaC08g39040.1D2 | BnaA09g51240.1D2 |
| DH5 | BnaC08g39050.1D2 | BnaA09g51230.1D2 |
| DH5 | BnaC08g39060.1D2 | BnaA09g51220.1D2 |
| DH5 | BnaC08g39090.1D2 | BnaA09g51170.1D2 |
| DH5 | BnaC08g39220.1D2 | BnaA09g51550.1D2 |
| DH5 | BnaC08g39240.1D2 | BnaA09g51540.1D2 |
| DH5 | BnaC08g39260.1D2 | BnaA09g51520.1D2 |
| DH5 | BnaC08g39270.1D2 | BnaA09g51510.1D2 |
| DH5 | BnaC08g39300.1D2 | BnaA09g51130.1D2 |
| DH5 | BnaC08g39320.1D2 | BnaA09g51120.1D2 |
| DH5 | BnaC08g39340.1D2 | BnaA09g51110.1D2 |
| DH5 | BnaC08g39380.1D2 | BnaA09g51070.1D2 |
| DH5 | BnaC08g39400.1D2 | BnaA09g51050.1D2 |
| DH5 | BnaC08g39410.1D2 | BnaA09g51040.1D2 |
| DH5 | BnaC08g39420.1D2 | BnaA09g51030.1D2 |
| DH5 | BnaC08g39460.1D2 | BnaA09g50990.1D2 |
| DH5 | BnaC08g39480.1D2 | BnaA09g50970.1D2 |
| DH5 | BnaC08g39510.1D2 | BnaA09g50940.1D2 |
| DH5 | BnaC08g39520.1D2 | BnaA09g50930.1D2 |
| DH5 | BnaC08g39540.1D2 | BnaA09g50920.1D2 |

|         |                  |                  |
|---------|------------------|------------------|
| DH5     | BnaC08g39570.1D2 | BnaA09g50900.1D2 |
| DH5     | BnaC08g39590.1D2 | BnaA09g50870.1D2 |
| DH5     | BnaC08g39620.1D2 | BnaA09g50820.1D2 |
| DH5     | BnaC08g39680.1D2 | BnaA09g50790.1D2 |
| DH5     | BnaC08g39690.1D2 | BnaA09g50780.1D2 |
| DH5     | BnaC08g39700.1D2 | BnaA09g50770.1D2 |
| DH5     | BnaC08g39710.1D2 | BnaA09g50760.1D2 |
| DH5     | BnaC08g39770.1D2 | BnaA09g50720.1D2 |
| DH5     | BnaC08g39810.1D2 | BnaA09g50680.1D2 |
| DH5     | BnaC08g39820.1D2 | BnaA09g50670.1D2 |
| DH5     | BnaC08g39890.1D2 | BnaA09g50630.1D2 |
| DH5     | BnaC08g39900.1D2 | BnaA09g50620.1D2 |
| DH5     | BnaC08g39930.1D2 | BnaA09g50590.1D2 |
| DH5     | BnaC08g39970.1D2 | BnaA09g50560.1D2 |
| DH5     | BnaC08g39980.1D2 | BnaA09g50550.1D2 |
| DH5     | BnaC08g39990.1D2 | BnaA09g50540.1D2 |
| DH5     | BnaC08g40080.1D2 | BnaA09g51630.1D2 |
| DH5     | BnaC08g40100.1D2 | BnaA09g51640.1D2 |
| DH5     | BnaC08g40110.1D2 | BnaA09g51640.1D2 |
| DH5     | BnaC08g40130.1D2 | BnaA09g51650.1D2 |
| DH5     | BnaC08g40140.1D2 | BnaA09g51650.1D2 |
| DH5     | BnaC08g40180.1D2 | BnaA09g51690.1D2 |
| DH5     | BnaC08g40190.1D2 | BnaA09g51700.1D2 |
| DH5     | BnaC08g40260.1D2 | BnaA09g50390.1D2 |
| DH5     | BnaC08g40280.1D2 | BnaA09g50370.1D2 |
| DH5     | BnaC08g40320.1D2 | BnaA09g50360.1D2 |
| DH5     | BnaC08g40330.1D2 | BnaA09g50340.1D2 |
| DH5     | BnaC08g40340.1D2 | BnaA09g50330.1D2 |
| DH5     | BnaC08g40360.1D2 | BnaA09g50320.1D2 |
| DH5     | BnaC08g40490.1D2 | BnaA09g51800.1D2 |
| DH5     | BnaC08g40500.1D2 | BnaA09g51810.1D2 |
| DH5     | BnaC08g40520.1D2 | BnaA09g51820.1D2 |
| DH5     | BnaC08g40540.1D2 | BnaA09g51840.1D2 |
| DH5     | BnaC08g40560.1D2 | BnaA09g51860.1D2 |
| DH5     | BnaC08g40710.1D2 | BnaA09g51140.1D2 |
| DH5     | BnaC08g40760.1D2 | BnaA09g51450.1D2 |
| Pacific | BnaC08g31250.1D2 | BnaA09g39770.1D2 |
| Pacific | BnaC08g35730.1D2 | BnaA09g47460.1D2 |
| Pacific | BnaC08g35780.1D2 | BnaA09g47520.1D2 |
| Pacific | BnaC08g35790.1D2 | BnaA09g47530.1D2 |
| Pacific | BnaC08g35800.1D2 | BnaA09g47540.1D2 |
| Pacific | BnaC08g35830.1D2 | BnaA09g47570.1D2 |
| Pacific | BnaC08g35840.1D2 | BnaA09g47570.1D2 |
| Pacific | BnaC08g35870.1D2 | BnaA09g47590.1D2 |
| Pacific | BnaC08g35930.1D2 | BnaA09g47690.1D2 |
| Pacific | BnaC08g35960.1D2 | BnaA09g47720.1D2 |
| Pacific | BnaC08g35970.1D2 | BnaA09g47730.1D2 |
| Pacific | BnaC08g36020.1D2 | BnaA09g47810.1D2 |
| Pacific | BnaC08g36050.1D2 | BnaA09g47830.1D2 |
| Pacific | BnaC08g36090.1D2 | BnaA09g47870.1D2 |
| Pacific | BnaC08g36130.1D2 | BnaA09g47880.1D2 |

|         |                  |                  |
|---------|------------------|------------------|
| Pacific | BnaC08g36140.1D2 | BnaA09g47890.1D2 |
| Pacific | BnaC08g36150.1D2 | BnaA09g47890.1D2 |
| Pacific | BnaC08g36170.1D2 | BnaA09g47900.1D2 |
| Pacific | BnaC08g36190.1D2 | BnaA09g47920.1D2 |
| Pacific | BnaC08g36200.1D2 | BnaA09g47930.1D2 |
| Pacific | BnaC08g36210.1D2 | BnaA09g47940.1D2 |
| Pacific | BnaC08g36280.1D2 | BnaA09g48000.1D2 |
| Pacific | BnaC08g36300.1D2 | BnaA09g48020.1D2 |
| Pacific | BnaC08g36340.1D2 | BnaA09g48070.1D2 |
| Pacific | BnaC08g36350.1D2 | BnaA09g48080.1D2 |
| Pacific | BnaC08g36360.1D2 | BnaA09g48090.1D2 |
| Pacific | BnaC08g36400.1D2 | BnaA09g48140.1D2 |
| Pacific | BnaC08g36440.1D2 | BnaA09g48180.1D2 |
| Pacific | BnaC08g36480.1D2 | BnaA09g48230.1D2 |
| Pacific | BnaC08g36490.1D2 | BnaA09g48240.1D2 |
| Pacific | BnaC08g36500.1D2 | BnaA09g48260.1D2 |
| Pacific | BnaC08g36510.1D2 | BnaA09g48270.1D2 |
| Pacific | BnaC08g36520.1D2 | BnaA09g48280.1D2 |
| Pacific | BnaC08g36540.1D2 | BnaA09g48300.1D2 |
| Pacific | BnaC08g36600.1D2 | BnaA09g48370.1D2 |
| Pacific | BnaC08g36620.1D2 | BnaA09g48390.1D2 |
| Pacific | BnaC08g36650.1D2 | BnaA09g48420.1D2 |
| Pacific | BnaC08g36670.1D2 | BnaA09g48440.1D2 |
| Pacific | BnaC08g36690.1D2 | BnaA09g48470.1D2 |
| Pacific | BnaC08g36800.1D2 | BnaA09g48480.1D2 |
| Pacific | BnaC08g36830.1D2 | BnaA09g48500.1D2 |
| Pacific | BnaC08g36860.1D2 | BnaA09g48530.1D2 |
| Pacific | BnaC08g36870.1D2 | BnaA09g48540.1D2 |
| Pacific | BnaC08g36920.1D2 | BnaA09g48580.1D2 |
| Pacific | BnaC08g36930.1D2 | BnaA09g48590.1D2 |
| Pacific | BnaC08g36940.1D2 | BnaA09g48600.1D2 |
| Pacific | BnaC08g36970.1D2 | BnaA09g49130.1D2 |
| Pacific | BnaC08g36980.1D2 | BnaA09g49120.1D2 |
| Pacific | BnaC08g37000.1D2 | BnaA09g48630.1D2 |
| Pacific | BnaC08g37030.1D2 | BnaA09g48640.1D2 |
| Pacific | BnaC08g37170.1D2 | BnaA09g48700.1D2 |
| Pacific | BnaC08g37220.1D2 | BnaA09g48740.1D2 |
| Pacific | BnaC08g37230.1D2 | BnaA09g48750.1D2 |
| Pacific | BnaC08g37240.1D2 | BnaA09g48760.1D2 |
| Pacific | BnaC08g37300.1D2 | BnaA09g48980.1D2 |
| Pacific | BnaC08g37330.1D2 | BnaA09g48940.1D2 |
| Pacific | BnaC08g37340.1D2 | BnaA09g48930.1D2 |
| Pacific | BnaC08g37350.1D2 | BnaA09g48920.1D2 |
| Pacific | BnaC08g37360.1D2 | BnaA09g48910.1D2 |
| Pacific | BnaC08g37400.1D2 | BnaA09g48870.1D2 |
| Pacific | BnaC08g37410.1D2 | BnaA09g48860.1D2 |
| Pacific | BnaC08g37650.1D2 | BnaA09g51360.1D2 |
| Pacific | BnaC08g37680.1D2 | BnaA09g51330.1D2 |
| Pacific | BnaC08g37720.1D2 | BnaA09g51290.1D2 |
| Pacific | BnaC08g39000.1D2 | BnaA09g51900.1D2 |
| Pacific | BnaC08g39090.1D2 | BnaA09g51170.1D2 |

|         |                  |                  |
|---------|------------------|------------------|
| Pacific | BnaC08g39180.1D2 | BnaA09g51590.1D2 |
| Pacific | BnaC08g39240.1D2 | BnaA09g51540.1D2 |
| Pacific | BnaC08g39260.1D2 | BnaA09g51520.1D2 |
| Pacific | BnaC08g39300.1D2 | BnaA09g51130.1D2 |
| Pacific | BnaC08g39320.1D2 | BnaA09g51120.1D2 |
| Pacific | BnaC08g39340.1D2 | BnaA09g51110.1D2 |
| Pacific | BnaC08g39380.1D2 | BnaA09g51070.1D2 |
| Pacific | BnaC08g39400.1D2 | BnaA09g51050.1D2 |
| Pacific | BnaC08g39410.1D2 | BnaA09g51040.1D2 |
| Pacific | BnaC08g39420.1D2 | BnaA09g51030.1D2 |
| Pacific | BnaC08g39440.1D2 | BnaA09g51010.1D2 |
| Pacific | BnaC08g39460.1D2 | BnaA09g50990.1D2 |
| Pacific | BnaC08g39480.1D2 | BnaA09g50970.1D2 |
| Pacific | BnaC08g39510.1D2 | BnaA09g50940.1D2 |
| Pacific | BnaC08g39520.1D2 | BnaA09g50930.1D2 |
| Pacific | BnaC08g39530.1D2 | BnaA09g50920.1D2 |
| Pacific | BnaC08g39540.1D2 | BnaA09g50920.1D2 |
| Pacific | BnaC08g39570.1D2 | BnaA09g50900.1D2 |
| Pacific | BnaC08g39580.1D2 | BnaA09g50870.1D2 |
| Pacific | BnaC08g39590.1D2 | BnaA09g50870.1D2 |
| Pacific | BnaC08g39620.1D2 | BnaA09g50820.1D2 |
| Pacific | BnaC08g39680.1D2 | BnaA09g50790.1D2 |
| Pacific | BnaC08g39690.1D2 | BnaA09g50780.1D2 |
| Pacific | BnaC08g39700.1D2 | BnaA09g50770.1D2 |
| Pacific | BnaC08g39710.1D2 | BnaA09g50760.1D2 |
| Pacific | BnaC08g39720.1D2 | BnaA09g50750.1D2 |
| Pacific | BnaC08g39760.1D2 | BnaA09g50720.1D2 |
| Pacific | BnaC08g39770.1D2 | BnaA09g50720.1D2 |
| Pacific | BnaC08g39810.1D2 | BnaA09g50680.1D2 |
| Pacific | BnaC08g39820.1D2 | BnaA09g50670.1D2 |
| Pacific | BnaC08g39890.1D2 | BnaA09g50630.1D2 |
| Pacific | BnaC08g39970.1D2 | BnaA09g50560.1D2 |
| Pacific | BnaC08g39980.1D2 | BnaA09g50550.1D2 |
| Pacific | BnaC08g39990.1D2 | BnaA09g50540.1D2 |
| Pacific | BnaC08g40080.1D2 | BnaA09g51630.1D2 |
| Pacific | BnaC08g40100.1D2 | BnaA09g51640.1D2 |
| Pacific | BnaC08g40110.1D2 | BnaA09g51640.1D2 |
| Pacific | BnaC08g40130.1D2 | BnaA09g51650.1D2 |
| Pacific | BnaC08g40140.1D2 | BnaA09g51650.1D2 |
| Pacific | BnaC08g40180.1D2 | BnaA09g51690.1D2 |
| Pacific | BnaC08g40190.1D2 | BnaA09g51700.1D2 |
| Pacific | BnaC08g40200.1D2 | BnaA09g51720.1D2 |
| Pacific | BnaC08g40260.1D2 | BnaA09g50390.1D2 |
| Pacific | BnaC08g40280.1D2 | BnaA09g50370.1D2 |
| Pacific | BnaC08g40300.1D2 | BnaA09g50360.1D2 |
| Pacific | BnaC08g40320.1D2 | BnaA09g50360.1D2 |
| Pacific | BnaC08g40340.1D2 | BnaA09g50330.1D2 |
| Pacific | BnaC08g40360.1D2 | BnaA09g50320.1D2 |
| Pacific | BnaC08g40500.1D2 | BnaA09g51810.1D2 |
| Pacific | BnaC08g40520.1D2 | BnaA09g51820.1D2 |
| Pacific | BnaC08g40610.1D2 | BnaA09g52680.1D2 |

|           |                  |                  |
|-----------|------------------|------------------|
| Pacific   | BnaC08g40630.1D2 | BnaA09g52710.1D2 |
| Pacific   | BnaC08g40640.1D2 | BnaA09g52720.1D2 |
| Pacific   | BnaC08g40650.1D2 | BnaA09g52730.1D2 |
| Pacific   | BnaC08g40690.1D2 | BnaA09g52770.1D2 |
| Pacific   | BnaC08g40710.1D2 | BnaA09g51140.1D2 |
| Pacific   | BnaC08g40730.1D2 | BnaA09g51170.1D2 |
| Pacific   | BnaC08g40760.1D2 | BnaA09g51450.1D2 |
| Pacific   | BnaC08g41370.1D2 | BnaA09g52800.1D2 |
| Pacific   | BnaC08g41380.1D2 | BnaA09g52810.1D2 |
| Sensation | BnaC08g36440.1D2 | BnaA09g48180.1D2 |
| Sensation | BnaC08g36520.1D2 | BnaA09g48280.1D2 |
| Sensation | BnaC08g36540.1D2 | BnaA09g48300.1D2 |
| Sensation | BnaC08g36670.1D2 | BnaA09g48440.1D2 |
| Sensation | BnaC08g36690.1D2 | BnaA09g48470.1D2 |
| Sensation | BnaC08g36830.1D2 | BnaA09g48500.1D2 |
| Sensation | BnaC08g36860.1D2 | BnaA09g48530.1D2 |
| Sensation | BnaC08g36870.1D2 | BnaA09g48540.1D2 |
| Sensation | BnaC08g36930.1D2 | BnaA09g48590.1D2 |
| Sensation | BnaC08g37000.1D2 | BnaA09g48630.1D2 |
| Sensation | BnaC08g37030.1D2 | BnaA09g48640.1D2 |
| Sensation | BnaC08g37230.1D2 | BnaA09g48750.1D2 |
| Sensation | BnaC08g37340.1D2 | BnaA09g48930.1D2 |
| Sensation | BnaC08g37400.1D2 | BnaA09g48870.1D2 |
| Sensation | BnaC08g37650.1D2 | BnaA09g51360.1D2 |
| Sensation | BnaC08g37660.1D2 | BnaA09g51350.1D2 |
| Sensation | BnaC08g37720.1D2 | BnaA09g51290.1D2 |
| Sensation | BnaC08g38030.1D2 | BnaA09g49590.1D2 |
| Sensation | BnaC08g38050.1D2 | BnaA09g49610.1D2 |
| Sensation | BnaC08g38060.1D2 | BnaA09g49620.1D2 |
| Sensation | BnaC08g38130.1D2 | BnaA09g49690.1D2 |
| Sensation | BnaC08g38140.1D2 | BnaA09g49700.1D2 |
| Sensation | BnaC08g38230.1D2 | BnaA09g49780.1D2 |
| Sensation | BnaC08g38320.1D2 | BnaA09g49850.1D2 |
| Sensation | BnaC08g38330.1D2 | BnaA09g49860.1D2 |
| Sensation | BnaC08g38370.1D2 | BnaA09g49900.1D2 |
| Sensation | BnaC08g38400.1D2 | BnaA09g49910.1D2 |
| Sensation | BnaC08g38430.1D2 | BnaA09g49930.1D2 |
| Sensation | BnaC08g38490.1D2 | BnaA09g49970.1D2 |
| Sensation | BnaC08g38510.1D2 | BnaA09g49990.1D2 |
| Sensation | BnaC08g38600.1D2 | BnaA09g50090.1D2 |
| Sensation | BnaC08g38610.1D2 | BnaA09g50100.1D2 |
| Sensation | BnaC08g38640.1D2 | BnaA09g50130.1D2 |
| Sensation | BnaC08g38660.1D2 | BnaA09g50150.1D2 |
| Sensation | BnaC08g38670.1D2 | BnaA09g50160.1D2 |
| Sensation | BnaC08g38700.1D2 | BnaA09g52150.1D2 |
| Sensation | BnaC08g38730.1D2 | BnaA09g52130.1D2 |
| Sensation | BnaC08g38780.1D2 | BnaA09g52080.1D2 |
| Sensation | BnaC08g38810.1D2 | BnaA09g52050.1D2 |
| Sensation | BnaC08g38820.1D2 | BnaA09g52040.1D2 |
| Sensation | BnaC08g38970.1D2 | BnaA09g51730.1D2 |
| Sensation | BnaC08g39000.1D2 | BnaA09g51900.1D2 |

|           |                  |                  |
|-----------|------------------|------------------|
| Sensation | BnaC08g39040.1D2 | BnaA09g51240.1D2 |
| Sensation | BnaC08g39050.1D2 | BnaA09g51230.1D2 |
| Sensation | BnaC08g39060.1D2 | BnaA09g51220.1D2 |
| Sensation | BnaC08g39090.1D2 | BnaA09g51170.1D2 |
| Sensation | BnaC08g39180.1D2 | BnaA09g51590.1D2 |
| Sensation | BnaC08g39240.1D2 | BnaA09g51540.1D2 |
| Sensation | BnaC08g39260.1D2 | BnaA09g51520.1D2 |
| Sensation | BnaC08g39300.1D2 | BnaA09g51130.1D2 |
| Sensation | BnaC08g39320.1D2 | BnaA09g51120.1D2 |
| Sensation | BnaC08g39340.1D2 | BnaA09g51110.1D2 |
| Sensation | BnaC08g39380.1D2 | BnaA09g51070.1D2 |
| Sensation | BnaC08g39460.1D2 | BnaA09g50990.1D2 |
| Sensation | BnaC08g39510.1D2 | BnaA09g50940.1D2 |
| Sensation | BnaC08g39520.1D2 | BnaA09g50930.1D2 |
| Sensation | BnaC08g39680.1D2 | BnaA09g50790.1D2 |
| Sensation | BnaC08g39690.1D2 | BnaA09g50780.1D2 |
| Sensation | BnaC08g39700.1D2 | BnaA09g50770.1D2 |
| Sensation | BnaC08g39980.1D2 | BnaA09g50550.1D2 |
| Sensation | BnaC08g39990.1D2 | BnaA09g50540.1D2 |
| Sensation | BnaC08g40030.1D2 | BnaA09g50460.1D2 |
| Sensation | BnaC08g40100.1D2 | BnaA09g51640.1D2 |
| Sensation | BnaC08g40110.1D2 | BnaA09g51640.1D2 |
| Sensation | BnaC08g40130.1D2 | BnaA09g51650.1D2 |
| Sensation | BnaC08g40180.1D2 | BnaA09g51690.1D2 |
| Sensation | BnaC08g40320.1D2 | BnaA09g50360.1D2 |
| Sensation | BnaC08g40330.1D2 | BnaA09g50340.1D2 |
| Sensation | BnaC08g40340.1D2 | BnaA09g50330.1D2 |
| Sensation | BnaC08g40360.1D2 | BnaA09g50320.1D2 |
| Sensation | BnaC08g40500.1D2 | BnaA09g51810.1D2 |
| Sensation | BnaC08g40520.1D2 | BnaA09g51820.1D2 |
| Sensation | BnaC08g40540.1D2 | BnaA09g51840.1D2 |
| Sensation | BnaC08g40560.1D2 | BnaA09g51860.1D2 |
| Sensation | BnaC08g40610.1D2 | BnaA09g52680.1D2 |
| Sensation | BnaC08g40640.1D2 | BnaA09g52720.1D2 |
| Sensation | BnaC08g40710.1D2 | BnaA09g51140.1D2 |
| Sensation | BnaC08g40720.1D2 | BnaA09g52420.1D2 |
| Sensation | BnaC08g40730.1D2 | BnaA09g51170.1D2 |
| Sensation | BnaC08g40760.1D2 | BnaA09g51450.1D2 |
| Sensation | BnaC08g40850.1D2 | BnaA09g50180.1D2 |
| Sensation | BnaC08g40950.1D2 | BnaA09g52260.1D2 |
| Sensation | BnaC08g41010.1D2 | BnaA09g52260.1D2 |
| Sensation | BnaC08g41050.1D2 | BnaA09g52310.1D2 |
| Sensation | BnaC08g41190.1D2 | BnaA09g52460.1D2 |
| Sensation | BnaC08g41260.1D2 | BnaA09g52540.1D2 |
| Sensation | BnaC08g41370.1D2 | BnaA09g52800.1D2 |
| Sensation | BnaC08g41380.1D2 | BnaA09g52810.1D2 |
| G50       | BnaC08g29850.1D2 | BnaA09g42140.1D2 |
| G50       | BnaC08g29860.1D2 | BnaA09g42150.1D2 |
| G50       | BnaC08g29880.1D2 | BnaA09g42160.1D2 |
| G50       | BnaC08g29900.1D2 | BnaA09g42190.1D2 |
| G50       | BnaC08g29930.1D2 | BnaA09g42230.1D2 |

|     |                  |                  |
|-----|------------------|------------------|
| G50 | BnaC08g29970.1D2 | BnaA09g42280.1D2 |
| G50 | BnaC08g30050.1D2 | BnaA09g42500.1D2 |
| G50 | BnaC08g30070.1D2 | BnaA09g42510.1D2 |
| G50 | BnaC08g30100.1D2 | BnaA09g42590.1D2 |
| G50 | BnaC08g30150.1D2 | BnaA09g42730.1D2 |
| G50 | BnaC08g30170.1D2 | BnaA09g42750.1D2 |
| G50 | BnaC08g30220.1D2 | BnaA09g42840.1D2 |
| G50 | BnaC08g30230.1D2 | BnaA09g42850.1D2 |
| G50 | BnaC08g30250.1D2 | BnaA09g42910.1D2 |
| G50 | BnaC08g30270.1D2 | BnaA09g42930.1D2 |
| G50 | BnaC08g30280.1D2 | BnaA09g42940.1D2 |
| G50 | BnaC08g30290.1D2 | BnaA09g42950.1D2 |
| G50 | BnaC08g30340.1D2 | BnaA09g43000.1D2 |
| G50 | BnaC08g30360.1D2 | BnaA09g43020.1D2 |
| G50 | BnaC08g30420.1D2 | BnaA09g43100.1D2 |
| G50 | BnaC08g30430.1D2 | BnaA09g43110.1D2 |
| G50 | BnaC08g30440.1D2 | BnaA09g43120.1D2 |
| G50 | BnaC08g30450.1D2 | BnaA09g43130.1D2 |
| G50 | BnaC08g30460.1D2 | BnaA09g43150.1D2 |
| G50 | BnaC08g30490.1D2 | BnaA09g43170.1D2 |
| G50 | BnaC08g30520.1D2 | BnaA09g43190.1D2 |
| G50 | BnaC08g30550.1D2 | BnaA09g43220.1D2 |
| G50 | BnaC08g30600.1D2 | BnaA09g43260.1D2 |
| G50 | BnaC08g30630.1D2 | BnaA09g43280.1D2 |
| G50 | BnaC08g30650.1D2 | BnaA09g43300.1D2 |
| G50 | BnaC08g30660.1D2 | BnaA09g43320.1D2 |
| G50 | BnaC08g30740.1D2 | BnaA09g43390.1D2 |
| G50 | BnaC08g30810.1D2 | BnaA09g43460.1D2 |
| G50 | BnaC08g30930.1D2 | BnaA09g43520.1D2 |
| G50 | BnaC08g30960.1D2 | BnaA09g43610.1D2 |
| G50 | BnaC08g30980.1D2 | BnaA09g43610.1D2 |
| G50 | BnaC08g31000.1D2 | BnaA09g43590.1D2 |
| G50 | BnaC08g31020.1D2 | BnaA09g44470.1D2 |
| G50 | BnaC08g31050.1D2 | BnaA09g42730.1D2 |
| G50 | BnaC08g31080.1D2 | BnaA09g43060.1D2 |
| G50 | BnaC08g31330.1D2 | BnaA09g42390.1D2 |
| G50 | BnaC08g31340.1D2 | BnaA09g42400.1D2 |
| G50 | BnaC08g31440.1D2 | BnaA09g42080.1D2 |
| G50 | BnaC08g31450.1D2 | BnaA09g42090.1D2 |
| G50 | BnaC08g31460.1D2 | BnaA09g42100.1D2 |
| G50 | BnaC08g31500.1D2 | BnaA09g43620.1D2 |
| G50 | BnaC08g31510.1D2 | BnaA09g43630.1D2 |
| G50 | BnaC08g31520.1D2 | BnaA09g43650.1D2 |
| G50 | BnaC08g31540.1D2 | BnaA09g43670.1D2 |
| G50 | BnaC08g31550.1D2 | BnaA09g43680.1D2 |
| G50 | BnaC08g31560.1D2 | BnaA09g43690.1D2 |
| G50 | BnaC08g31570.1D2 | BnaA09g43700.1D2 |
| G50 | BnaC08g31620.1D2 | BnaA09g43750.1D2 |
| G50 | BnaC08g31780.1D2 | BnaA09g43850.1D2 |
| G50 | BnaC08g31820.1D2 | BnaA09g43900.1D2 |
| G50 | BnaC08g31830.1D2 | BnaA09g43910.1D2 |

|     |                  |                  |
|-----|------------------|------------------|
| G50 | BnaC08g31840.1D2 | BnaA09g43920.1D2 |
| G50 | BnaC08g31850.1D2 | BnaA09g43930.1D2 |
| G50 | BnaC08g31880.1D2 | BnaA09g43960.1D2 |
| G50 | BnaC08g31900.1D2 | BnaA09g43980.1D2 |
| G50 | BnaC08g31910.1D2 | BnaA09g43990.1D2 |
| G50 | BnaC08g31930.1D2 | BnaA09g44010.1D2 |
| G50 | BnaC08g31990.1D2 | BnaA09g44070.1D2 |
| G50 | BnaC08g32130.1D2 | BnaA09g44170.1D2 |
| G50 | BnaC08g32150.1D2 | BnaA09g44190.1D2 |
| G50 | BnaC08g32180.1D2 | BnaA09g44240.1D2 |
| G50 | BnaC08g32240.1D2 | BnaA09g44290.1D2 |
| G50 | BnaC08g32250.1D2 | BnaA09g44300.1D2 |
| G50 | BnaC08g32310.1D2 | BnaA09g44330.1D2 |
| G50 | BnaC08g32340.1D2 | BnaA09g44370.1D2 |
| G50 | BnaC08g32360.1D2 | BnaA09g44390.1D2 |
| G50 | BnaC08g32410.1D2 | BnaA09g44510.1D2 |
| G50 | BnaC08g32420.1D2 | BnaA09g44520.1D2 |
| G50 | BnaC08g32430.1D2 | BnaA09g44530.1D2 |
| G50 | BnaC08g32450.1D2 | BnaA09g44550.1D2 |
| G50 | BnaC08g32470.1D2 | BnaA09g44570.1D2 |
| G50 | BnaC08g32480.1D2 | BnaA09g44590.1D2 |
| G50 | BnaC08g32490.1D2 | BnaA09g44600.1D2 |
| G50 | BnaC08g32510.1D2 | BnaA09g44620.1D2 |
| G50 | BnaC08g32540.1D2 | BnaA09g44680.1D2 |
| G50 | BnaC08g32550.1D2 | BnaA09g44700.1D2 |
| G50 | BnaC08g32600.1D2 | BnaA09g44790.1D2 |
| G50 | BnaC08g32610.1D2 | BnaA09g44810.1D2 |
| G50 | BnaC08g32620.1D2 | BnaA09g44830.1D2 |
| G50 | BnaC08g32640.1D2 | BnaA09g44840.1D2 |
| G50 | BnaC08g32660.1D2 | BnaA09g44880.1D2 |
| G50 | BnaC08g32670.1D2 | BnaA09g44890.1D2 |
| G50 | BnaC08g32700.1D2 | BnaA09g44910.1D2 |
| G50 | BnaC08g32730.1D2 | BnaA09g44940.1D2 |
| G50 | BnaC08g32750.1D2 | BnaA09g46540.1D2 |
| G50 | BnaC08g32810.1D2 | BnaA09g45000.1D2 |
| G50 | BnaC08g32820.1D2 | BnaA09g45010.1D2 |
| G50 | BnaC08g32830.1D2 | BnaA09g45020.1D2 |
| G50 | BnaC08g32840.1D2 | BnaA09g45030.1D2 |
| G50 | BnaC08g32850.1D2 | BnaA09g45040.1D2 |
| G50 | BnaC08g32860.1D2 | BnaA09g45050.1D2 |
| G50 | BnaC08g32900.1D2 | BnaA09g45090.1D2 |
| G50 | BnaC08g32910.1D2 | BnaA09g45100.1D2 |
| G50 | BnaC08g32940.1D2 | BnaA09g45120.1D2 |
| G50 | BnaC08g32960.1D2 | BnaA09g45160.1D2 |
| G50 | BnaC08g32980.1D2 | BnaA09g45190.1D2 |
| G50 | BnaC08g33000.1D2 | BnaA09g45210.1D2 |
| G50 | BnaC08g33020.1D2 | BnaA09g45230.1D2 |
| G50 | BnaC08g33030.1D2 | BnaA09g45240.1D2 |
| G50 | BnaC08g33040.1D2 | BnaA09g45250.1D2 |
| G50 | BnaC08g33150.1D2 | BnaA09g45330.1D2 |
| G50 | BnaC08g33280.1D2 | BnaA09g45430.1D2 |



|     |                  |                  |
|-----|------------------|------------------|
| G50 | BnaC08g33300.1D2 | BnaA09g45450.1D2 |
| G50 | BnaC08g33410.1D2 | BnaA09g45490.1D2 |
| G50 | BnaC08g33430.1D2 | BnaA09g45500.1D2 |
| G50 | BnaC08g33440.1D2 | BnaA09g45520.1D2 |
| G50 | BnaC08g33450.1D2 | BnaA09g45530.1D2 |
| G50 | BnaC08g33470.1D2 | BnaA09g45560.1D2 |
| G50 | BnaC08g33480.1D2 | BnaA09g45570.1D2 |
| G50 | BnaC08g33490.1D2 | BnaA09g45580.1D2 |
| G50 | BnaC08g33500.1D2 | BnaA09g45590.1D2 |
| G50 | BnaC08g33510.1D2 | BnaA09g45600.1D2 |
| G50 | BnaC08g33730.1D2 | BnaA09g46420.1D2 |
| G50 | BnaC08g33760.1D2 | BnaA09g46450.1D2 |
| G50 | BnaC08g33790.1D2 | BnaA09g46480.1D2 |
| G50 | BnaC08g33800.1D2 | BnaA09g46490.1D2 |
| G50 | BnaC08g33810.1D2 | BnaA09g46500.1D2 |
| G50 | BnaC08g33890.1D2 | BnaA09g46090.1D2 |
| G50 | BnaC08g33900.1D2 | BnaA09g46100.1D2 |
| G50 | BnaC08g34000.1D2 | BnaA09g46190.1D2 |
| G50 | BnaC08g34070.1D2 | BnaA09g46260.1D2 |
| G50 | BnaC08g34190.1D2 | BnaA09g45940.1D2 |
| G50 | BnaC08g34220.1D2 | BnaA09g45910.1D2 |
| G50 | BnaC08g34230.1D2 | BnaA09g45900.1D2 |
| G50 | BnaC08g34250.1D2 | BnaA09g45860.1D2 |
| G50 | BnaC08g34270.1D2 | BnaA09g45840.1D2 |
| G50 | BnaC08g34380.1D2 | BnaA09g46700.1D2 |
| G50 | BnaC08g34390.1D2 | BnaA09g46710.1D2 |
| G50 | BnaC08g34400.1D2 | BnaA09g46720.1D2 |
| G50 | BnaC08g34420.1D2 | BnaA09g46740.1D2 |
| G50 | BnaC08g34430.1D2 | BnaA09g46750.1D2 |
| G50 | BnaC08g34440.1D2 | BnaA09g46760.1D2 |
| G50 | BnaC08g34450.1D2 | BnaA09g46770.1D2 |
| G50 | BnaC08g34500.1D2 | BnaA09g46800.1D2 |
| G50 | BnaC08g34500.1D2 | BnaA09g46810.1D2 |
| G50 | BnaC08g34530.1D2 | BnaA09g46840.1D2 |
| G50 | BnaC08g34540.1D2 | BnaA09g46850.1D2 |
| G50 | BnaC08g34570.1D2 | BnaA09g46870.1D2 |
| G50 | BnaC08g34610.1D2 | BnaA09g46890.1D2 |
| G50 | BnaC08g34630.1D2 | BnaA09g46910.1D2 |
| G50 | BnaC08g34650.1D2 | BnaA09g46930.1D2 |
| G50 | BnaC08g34660.1D2 | BnaA09g46940.1D2 |
| G50 | BnaC08g34670.1D2 | BnaA09g46950.1D2 |
| G50 | BnaC08g34700.1D2 | BnaA09g45800.1D2 |
| G50 | BnaC08g34710.1D2 | BnaA09g45780.1D2 |
| G50 | BnaC08g34770.1D2 | BnaA09g45690.1D2 |
| G50 | BnaC08g34830.1D2 | BnaA09g45730.1D2 |
| G50 | BnaC08g34840.1D2 | BnaA09g45740.1D2 |
| G50 | BnaC08g34850.1D2 | BnaA09g45740.1D2 |
| G50 | BnaC08g34860.1D2 | BnaA09g45750.1D2 |
| G50 | BnaC08g34870.1D2 | BnaA09g45760.1D2 |
| G50 | BnaC08g34880.1D2 | BnaA09g46960.1D2 |
| G50 | BnaC08g34920.1D2 | BnaA09g47000.1D2 |

|     |                  |                  |
|-----|------------------|------------------|
| G50 | BnaC08g34930.1D2 | BnaA09g47010.1D2 |
| G50 | BnaC08g35000.1D2 | BnaA09g47060.1D2 |
| G50 | BnaC08g35010.1D2 | BnaA09g47070.1D2 |
| G50 | BnaC08g35020.1D2 | BnaA09g47080.1D2 |
| G50 | BnaC08g35030.1D2 | BnaA09g47090.1D2 |
| G50 | BnaC08g35110.1D2 | BnaA09g47180.1D2 |
| G50 | BnaC08g35120.1D2 | BnaA09g47190.1D2 |
| G50 | BnaC08g35140.1D2 | BnaA09g44200.1D2 |
| G50 | BnaC08g35230.1D2 | BnaA09g46620.1D2 |
| G50 | BnaC08g35250.1D2 | BnaA09g46600.1D2 |
| G50 | BnaC08g35370.1D2 | BnaA09g45990.1D2 |
| G50 | BnaC08g35490.1D2 | BnaA09g47240.1D2 |
| G50 | BnaC08g35550.1D2 | BnaA09g47290.1D2 |
| G50 | BnaC08g35560.1D2 | BnaA09g47300.1D2 |
| G50 | BnaC08g35600.1D2 | BnaA09g47340.1D2 |
| G50 | BnaC08g35610.1D2 | BnaA09g47350.1D2 |
| G50 | BnaC08g35650.1D2 | BnaA09g47390.1D2 |
| G50 | BnaC08g35670.1D2 | BnaA09g47410.1D2 |
| G50 | BnaC08g35680.1D2 | BnaA09g47420.1D2 |
| G50 | BnaC08g35730.1D2 | BnaA09g47460.1D2 |
| G50 | BnaC08g35780.1D2 | BnaA09g47520.1D2 |
| G50 | BnaC08g35800.1D2 | BnaA09g47540.1D2 |
| G50 | BnaC08g35830.1D2 | BnaA09g47570.1D2 |
| G50 | BnaC08g35840.1D2 | BnaA09g47570.1D2 |
| G50 | BnaC08g35870.1D2 | BnaA09g47590.1D2 |
| G50 | BnaC08g35930.1D2 | BnaA09g47690.1D2 |
| G50 | BnaC08g35960.1D2 | BnaA09g47720.1D2 |
| G50 | BnaC08g35970.1D2 | BnaA09g47730.1D2 |
| G50 | BnaC08g36020.1D2 | BnaA09g47810.1D2 |
| G50 | BnaC08g36040.1D2 | BnaA09g47440.1D2 |
| G50 | BnaC08g36150.1D2 | BnaA09g47890.1D2 |
| G50 | BnaC08g36170.1D2 | BnaA09g47900.1D2 |
| G50 | BnaC08g36200.1D2 | BnaA09g47930.1D2 |
| G50 | BnaC08g36210.1D2 | BnaA09g47940.1D2 |
| G50 | BnaC08g36220.1D2 | BnaA09g47950.1D2 |
| G50 | BnaC08g36280.1D2 | BnaA09g48000.1D2 |
| G50 | BnaC08g36300.1D2 | BnaA09g48020.1D2 |
| G50 | BnaC08g36340.1D2 | BnaA09g48070.1D2 |
| G50 | BnaC08g36350.1D2 | BnaA09g48080.1D2 |
| G50 | BnaC08g36360.1D2 | BnaA09g48090.1D2 |
| G50 | BnaC08g36400.1D2 | BnaA09g48140.1D2 |
| G50 | BnaC08g36420.1D2 | BnaA09g48160.1D2 |
| G50 | BnaC08g36440.1D2 | BnaA09g48180.1D2 |
| G50 | BnaC08g36480.1D2 | BnaA09g48230.1D2 |
| G50 | BnaC08g36490.1D2 | BnaA09g48240.1D2 |
| G50 | BnaC08g36500.1D2 | BnaA09g48260.1D2 |
| G50 | BnaC08g36510.1D2 | BnaA09g48270.1D2 |
| G50 | BnaC08g36520.1D2 | BnaA09g48280.1D2 |
| G50 | BnaC08g36540.1D2 | BnaA09g48300.1D2 |
| G50 | BnaC08g36600.1D2 | BnaA09g48370.1D2 |
| G50 | BnaC08g36620.1D2 | BnaA09g48390.1D2 |

|     |                  |                  |
|-----|------------------|------------------|
| G50 | BnaC08g36650.1D2 | BnaA09g48420.1D2 |
| G50 | BnaC08g36690.1D2 | BnaA09g48470.1D2 |
| G50 | BnaC08g36800.1D2 | BnaA09g48480.1D2 |
| G50 | BnaC08g36830.1D2 | BnaA09g48500.1D2 |
| G50 | BnaC08g36860.1D2 | BnaA09g48530.1D2 |
| G50 | BnaC08g36920.1D2 | BnaA09g48580.1D2 |
| G50 | BnaC08g36930.1D2 | BnaA09g48590.1D2 |
| G50 | BnaC08g36980.1D2 | BnaA09g49120.1D2 |
| G50 | BnaC08g37000.1D2 | BnaA09g48630.1D2 |
| G50 | BnaC08g37030.1D2 | BnaA09g48640.1D2 |
| G50 | BnaC08g37170.1D2 | BnaA09g48700.1D2 |
| G50 | BnaC08g37220.1D2 | BnaA09g48740.1D2 |
| G50 | BnaC08g37230.1D2 | BnaA09g48750.1D2 |
| G50 | BnaC08g37300.1D2 | BnaA09g48980.1D2 |
| G50 | BnaC08g37330.1D2 | BnaA09g48940.1D2 |
| G50 | BnaC08g37340.1D2 | BnaA09g48930.1D2 |
| G50 | BnaC08g37350.1D2 | BnaA09g48920.1D2 |
| G50 | BnaC08g37360.1D2 | BnaA09g48910.1D2 |
| G50 | BnaC08g37400.1D2 | BnaA09g48870.1D2 |
| G50 | BnaC08g37410.1D2 | BnaA09g48860.1D2 |
| G50 | BnaC08g37450.1D2 | BnaA09g49090.1D2 |
| G50 | BnaC08g37460.1D2 | BnaA09g49090.1D2 |
| G50 | BnaC08g37680.1D2 | BnaA09g51330.1D2 |
| G50 | BnaC08g37720.1D2 | BnaA09g51290.1D2 |
| G50 | BnaC08g37790.1D2 | BnaA09g49350.1D2 |
| G50 | BnaC08g37910.1D2 | BnaA09g49490.1D2 |
| G50 | BnaC08g37920.1D2 | BnaA09g49500.1D2 |
| G50 | BnaC08g38000.1D2 | BnaA09g49570.1D2 |
| G50 | BnaC08g38010.1D2 | BnaA09g49580.1D2 |
| G50 | BnaC08g38060.1D2 | BnaA09g49620.1D2 |
| G50 | BnaC08g38080.1D2 | BnaA09g49640.1D2 |
| G50 | BnaC08g38130.1D2 | BnaA09g49690.1D2 |
| G50 | BnaC08g38140.1D2 | BnaA09g49700.1D2 |
| G50 | BnaC08g38150.1D2 | BnaA09g49710.1D2 |
| G50 | BnaC08g38320.1D2 | BnaA09g49850.1D2 |
| G50 | BnaC08g38330.1D2 | BnaA09g49860.1D2 |
| G50 | BnaC08g38370.1D2 | BnaA09g49900.1D2 |
| G50 | BnaC08g38420.1D2 | BnaA09g49920.1D2 |
| G50 | BnaC08g38580.1D2 | BnaA09g50070.1D2 |
| G50 | BnaC08g38580.1D2 | BnaA09g50080.1D2 |
| G50 | BnaC08g38590.1D2 | BnaA09g50070.1D2 |
| G50 | BnaC08g38590.1D2 | BnaA09g50080.1D2 |
| G50 | BnaC08g38600.1D2 | BnaA09g50090.1D2 |
| G50 | BnaC08g38610.1D2 | BnaA09g50100.1D2 |
| G50 | BnaC08g38640.1D2 | BnaA09g50130.1D2 |
| G50 | BnaC08g38660.1D2 | BnaA09g50150.1D2 |
| G50 | BnaC08g38670.1D2 | BnaA09g50160.1D2 |
| G50 | BnaC08g38700.1D2 | BnaA09g52150.1D2 |
| G50 | BnaC08g38730.1D2 | BnaA09g52130.1D2 |
| G50 | BnaC08g38780.1D2 | BnaA09g52080.1D2 |
| G50 | BnaC08g38790.1D2 | BnaA09g52070.1D2 |

|     |                  |                  |
|-----|------------------|------------------|
| G50 | BnaC08g38810.1D2 | BnaA09g52050.1D2 |
| G50 | BnaC08g38820.1D2 | BnaA09g52040.1D2 |
| G50 | BnaC08g38850.1D2 | BnaA09g52010.1D2 |
| G50 | BnaC08g38860.1D2 | BnaA09g52000.1D2 |
| G50 | BnaC08g39000.1D2 | BnaA09g51900.1D2 |
| G50 | BnaC08g39090.1D2 | BnaA09g51170.1D2 |
| G50 | BnaC08g39100.1D2 | BnaA09g51160.1D2 |
| G50 | BnaC08g39180.1D2 | BnaA09g51590.1D2 |
| G50 | BnaC08g39240.1D2 | BnaA09g51540.1D2 |
| G50 | BnaC08g39260.1D2 | BnaA09g51520.1D2 |
| G50 | BnaC08g39300.1D2 | BnaA09g51130.1D2 |
| G50 | BnaC08g39320.1D2 | BnaA09g51120.1D2 |
| G50 | BnaC08g39340.1D2 | BnaA09g51110.1D2 |
| G50 | BnaC08g39380.1D2 | BnaA09g51070.1D2 |
| G50 | BnaC08g39400.1D2 | BnaA09g51050.1D2 |
| G50 | BnaC08g39410.1D2 | BnaA09g51040.1D2 |
| G50 | BnaC08g39420.1D2 | BnaA09g51030.1D2 |
| G50 | BnaC08g39440.1D2 | BnaA09g51010.1D2 |
| G50 | BnaC08g39460.1D2 | BnaA09g50990.1D2 |
| G50 | BnaC08g39480.1D2 | BnaA09g50970.1D2 |
| G50 | BnaC08g39510.1D2 | BnaA09g50940.1D2 |
| G50 | BnaC08g39520.1D2 | BnaA09g50930.1D2 |
| G50 | BnaC08g39570.1D2 | BnaA09g50900.1D2 |
| G50 | BnaC08g39580.1D2 | BnaA09g50870.1D2 |
| G50 | BnaC08g39590.1D2 | BnaA09g50870.1D2 |
| G50 | BnaC08g39620.1D2 | BnaA09g50820.1D2 |
| G50 | BnaC08g39680.1D2 | BnaA09g50790.1D2 |
| G50 | BnaC08g39690.1D2 | BnaA09g50780.1D2 |
| G50 | BnaC08g39700.1D2 | BnaA09g50770.1D2 |
| G50 | BnaC08g39710.1D2 | BnaA09g50760.1D2 |
| G50 | BnaC08g39720.1D2 | BnaA09g50750.1D2 |
| G50 | BnaC08g39770.1D2 | BnaA09g50720.1D2 |
| G50 | BnaC08g39820.1D2 | BnaA09g50670.1D2 |
| G50 | BnaC08g39890.1D2 | BnaA09g50630.1D2 |
| G50 | BnaC08g39930.1D2 | BnaA09g50590.1D2 |
| G50 | BnaC08g39970.1D2 | BnaA09g50560.1D2 |
| G50 | BnaC08g39980.1D2 | BnaA09g50550.1D2 |
| G50 | BnaC08g40000.1D2 | BnaA09g50490.1D2 |
| G50 | BnaC08g40030.1D2 | BnaA09g50460.1D2 |
| G50 | BnaC08g40070.1D2 | BnaA09g51620.1D2 |
| G50 | BnaC08g40110.1D2 | BnaA09g51640.1D2 |
| G50 | BnaC08g40130.1D2 | BnaA09g51650.1D2 |
| G50 | BnaC08g40140.1D2 | BnaA09g51650.1D2 |
| G50 | BnaC08g40180.1D2 | BnaA09g51690.1D2 |
| G50 | BnaC08g40280.1D2 | BnaA09g50370.1D2 |
| G50 | BnaC08g40300.1D2 | BnaA09g50360.1D2 |
| G50 | BnaC08g40320.1D2 | BnaA09g50360.1D2 |
| G50 | BnaC08g40330.1D2 | BnaA09g50340.1D2 |
| G50 | BnaC08g40340.1D2 | BnaA09g50330.1D2 |
| G50 | BnaC08g40360.1D2 | BnaA09g50320.1D2 |
| G50 | BnaC08g40370.1D2 | BnaA09g50310.1D2 |

|      |                  |                  |
|------|------------------|------------------|
| G50  | BnaC08g40410.1D2 | BnaA09g50260.1D2 |
| G50  | BnaC08g40420.1D2 | BnaA09g50250.1D2 |
| G50  | BnaC08g40500.1D2 | BnaA09g51810.1D2 |
| G50  | BnaC08g40610.1D2 | BnaA09g52680.1D2 |
| G50  | BnaC08g40630.1D2 | BnaA09g52710.1D2 |
| G50  | BnaC08g40640.1D2 | BnaA09g52720.1D2 |
| G50  | BnaC08g40650.1D2 | BnaA09g52730.1D2 |
| G50  | BnaC08g40710.1D2 | BnaA09g51140.1D2 |
| G50  | BnaC08g40720.1D2 | BnaA09g52420.1D2 |
| G50  | BnaC08g40730.1D2 | BnaA09g51170.1D2 |
| G50  | BnaC08g40760.1D2 | BnaA09g51450.1D2 |
| G50  | BnaC08g40820.1D2 | BnaA09g50230.1D2 |
| G50  | BnaC08g40850.1D2 | BnaA09g50180.1D2 |
| G50  | BnaC08g40880.1D2 | BnaA09g52190.1D2 |
| G50  | BnaC08g40950.1D2 | BnaA09g52260.1D2 |
| G50  | BnaC08g41010.1D2 | BnaA09g52260.1D2 |
| G50  | BnaC08g41050.1D2 | BnaA09g52310.1D2 |
| G50  | BnaC08g41120.1D2 | BnaA09g52390.1D2 |
| G50  | BnaC08g41190.1D2 | BnaA09g52460.1D2 |
| G50  | BnaC08g41210.1D2 | BnaA09g52470.1D2 |
| G50  | BnaC08g41240.1D2 | BnaA09g52520.1D2 |
| G50  | BnaC08g41280.1D2 | BnaA09g52560.1D2 |
| G50  | BnaC08g41290.1D2 | BnaA09g52570.1D2 |
| G50  | BnaC08g41300.1D2 | BnaA09g52580.1D2 |
| G50  | BnaC08g41310.1D2 | BnaA09g52590.1D2 |
| G50  | BnaC08g41320.1D2 | BnaA09g52600.1D2 |
| G50  | BnaC08g41370.1D2 | BnaA09g52800.1D2 |
| G50  | BnaC08g41380.1D2 | BnaA09g52810.1D2 |
| G50  | BnaC08g41390.1D2 | BnaA09g52820.1D2 |
| H165 | BnaC08g34400.1D2 | BnaA09g46720.1D2 |
| H165 | BnaC08g34570.1D2 | BnaA09g46870.1D2 |
| H165 | BnaC08g34670.1D2 | BnaA09g46950.1D2 |
| H165 | BnaC08g34710.1D2 | BnaA09g45780.1D2 |
| H165 | BnaC08g34850.1D2 | BnaA09g45740.1D2 |
| H165 | BnaC08g35610.1D2 | BnaA09g47350.1D2 |
| H165 | BnaC08g35650.1D2 | BnaA09g47390.1D2 |
| H165 | BnaC08g35800.1D2 | BnaA09g47540.1D2 |
| H165 | BnaC08g35830.1D2 | BnaA09g47570.1D2 |
| H165 | BnaC08g35930.1D2 | BnaA09g47690.1D2 |
| H165 | BnaC08g35960.1D2 | BnaA09g47720.1D2 |
| H165 | BnaC08g36190.1D2 | BnaA09g47920.1D2 |
| H165 | BnaC08g36210.1D2 | BnaA09g47940.1D2 |
| H165 | BnaC08g36420.1D2 | BnaA09g48160.1D2 |
| H165 | BnaC08g36440.1D2 | BnaA09g48180.1D2 |
| H165 | BnaC08g36520.1D2 | BnaA09g48280.1D2 |
| H165 | BnaC08g36540.1D2 | BnaA09g48300.1D2 |
| H165 | BnaC08g36980.1D2 | BnaA09g49120.1D2 |
| H165 | BnaC08g37000.1D2 | BnaA09g48630.1D2 |
| H165 | BnaC08g37030.1D2 | BnaA09g48640.1D2 |
| H165 | BnaC08g37230.1D2 | BnaA09g48750.1D2 |
| H165 | BnaC08g37240.1D2 | BnaA09g48760.1D2 |

|      |                  |                  |
|------|------------------|------------------|
| H165 | BnaC08g37300.1D2 | BnaA09g48980.1D2 |
| H165 | BnaC08g37360.1D2 | BnaA09g48910.1D2 |
| H165 | BnaC08g37400.1D2 | BnaA09g48870.1D2 |
| H165 | BnaC08g37460.1D2 | BnaA09g49090.1D2 |
| H165 | BnaC08g37650.1D2 | BnaA09g51360.1D2 |
| H165 | BnaC08g37840.1D2 | BnaA09g49410.1D2 |
| H165 | BnaC08g37890.1D2 | BnaA09g49470.1D2 |
| H165 | BnaC08g38130.1D2 | BnaA09g49690.1D2 |
| H165 | BnaC08g38140.1D2 | BnaA09g49700.1D2 |
| H165 | BnaC08g38230.1D2 | BnaA09g49780.1D2 |
| H165 | BnaC08g38320.1D2 | BnaA09g49850.1D2 |
| H165 | BnaC08g38430.1D2 | BnaA09g49930.1D2 |
| H165 | BnaC08g38450.1D2 | BnaA09g49940.1D2 |
| H165 | BnaC08g39460.1D2 | BnaA09g50990.1D2 |
| H165 | BnaC08g39540.1D2 | BnaA09g50920.1D2 |
| H165 | BnaC08g39680.1D2 | BnaA09g50790.1D2 |
| H165 | BnaC08g39690.1D2 | BnaA09g50780.1D2 |
| H165 | BnaC08g39700.1D2 | BnaA09g50770.1D2 |
| H165 | BnaC08g39710.1D2 | BnaA09g50760.1D2 |
| H165 | BnaC08g39980.1D2 | BnaA09g50550.1D2 |
| H165 | BnaC08g40030.1D2 | BnaA09g50460.1D2 |
| H165 | BnaC08g40100.1D2 | BnaA09g51640.1D2 |
| H165 | BnaC08g40110.1D2 | BnaA09g51640.1D2 |
| H165 | BnaC08g40130.1D2 | BnaA09g51650.1D2 |
| H165 | BnaC08g40180.1D2 | BnaA09g51690.1D2 |
| H165 | BnaC08g40300.1D2 | BnaA09g50360.1D2 |
| H165 | BnaC08g40330.1D2 | BnaA09g50340.1D2 |
| H165 | BnaC08g40340.1D2 | BnaA09g50330.1D2 |
| H44  | BnaC08g18840.1D2 | BnaA09g52170.1D2 |
| H44  | BnaC08g29180.1D2 | BnaA09g41220.1D2 |
| H44  | BnaC08g29210.1D2 | BnaA09g41250.1D2 |
| H44  | BnaC08g29270.1D2 | BnaA09g41290.1D2 |
| H44  | BnaC08g29350.1D2 | BnaA09g41460.1D2 |
| H44  | BnaC08g29380.1D2 | BnaA09g41480.1D2 |
| H44  | BnaC08g29390.1D2 | BnaA09g41490.1D2 |
| H44  | BnaC08g29480.1D2 | BnaA09g41770.1D2 |
| H44  | BnaC08g29730.1D2 | BnaA09g41960.1D2 |
| H44  | BnaC08g29790.1D2 | BnaA09g42010.1D2 |
| H44  | BnaC08g29850.1D2 | BnaA09g42140.1D2 |
| H44  | BnaC08g29860.1D2 | BnaA09g42150.1D2 |
| H44  | BnaC08g29880.1D2 | BnaA09g42160.1D2 |
| H44  | BnaC08g29890.1D2 | BnaA09g42180.1D2 |
| H44  | BnaC08g29890.1D2 | BnaA09g42330.1D2 |
| H44  | BnaC08g29900.1D2 | BnaA09g42190.1D2 |
| H44  | BnaC08g30020.1D2 | BnaA09g42340.1D2 |
| H44  | BnaC08g30050.1D2 | BnaA09g42500.1D2 |
| H44  | BnaC08g30120.1D2 | BnaA09g42600.1D2 |
| H44  | BnaC08g30290.1D2 | BnaA09g42950.1D2 |
| H44  | BnaC08g30360.1D2 | BnaA09g43020.1D2 |
| H44  | BnaC08g30460.1D2 | BnaA09g43150.1D2 |
| H44  | BnaC08g30540.1D2 | BnaA09g43210.1D2 |

|     |                  |                  |
|-----|------------------|------------------|
| H44 | BnaC08g30550.1D2 | BnaA09g43220.1D2 |
| H44 | BnaC08g30630.1D2 | BnaA09g43280.1D2 |
| H44 | BnaC08g30810.1D2 | BnaA09g43460.1D2 |
| H44 | BnaC08g30960.1D2 | BnaA09g43610.1D2 |
| H44 | BnaC08g30980.1D2 | BnaA09g43610.1D2 |
| H44 | BnaC08g31000.1D2 | BnaA09g43590.1D2 |
| H44 | BnaC08g31170.1D2 | BnaA09g41450.1D2 |
| H44 | BnaC08g31290.1D2 | BnaA09g42050.1D2 |
| H44 | BnaC08g31340.1D2 | BnaA09g42400.1D2 |
| H44 | BnaC08g31440.1D2 | BnaA09g42080.1D2 |
| H44 | BnaC08g31470.1D2 | BnaA09g42110.1D2 |
| H44 | BnaC08g31510.1D2 | BnaA09g43630.1D2 |
| H44 | BnaC08g31540.1D2 | BnaA09g43670.1D2 |
| H44 | BnaC08g31550.1D2 | BnaA09g43680.1D2 |
| H44 | BnaC08g31620.1D2 | BnaA09g43750.1D2 |
| H44 | BnaC08g31760.1D2 | BnaA09g43830.1D2 |
| H44 | BnaC08g31780.1D2 | BnaA09g43850.1D2 |
| H44 | BnaC08g31820.1D2 | BnaA09g43900.1D2 |
| H44 | BnaC08g31860.1D2 | BnaA09g43940.1D2 |
| H44 | BnaC08g31920.1D2 | BnaA09g44000.1D2 |
| H44 | BnaC08g31930.1D2 | BnaA09g44010.1D2 |
| H44 | BnaC08g31990.1D2 | BnaA09g44070.1D2 |
| H44 | BnaC08g32040.1D2 | BnaA09g44100.1D2 |
| H44 | BnaC08g32060.1D2 | BnaA09g44120.1D2 |
| H44 | BnaC08g32110.1D2 | BnaA09g44150.1D2 |
| H44 | BnaC08g32130.1D2 | BnaA09g44170.1D2 |
| H44 | BnaC08g32140.1D2 | BnaA09g44180.1D2 |
| H44 | BnaC08g32180.1D2 | BnaA09g44240.1D2 |
| H44 | BnaC08g32250.1D2 | BnaA09g44300.1D2 |
| H44 | BnaC08g32310.1D2 | BnaA09g44330.1D2 |
| H44 | BnaC08g32340.1D2 | BnaA09g44370.1D2 |
| H44 | BnaC08g32410.1D2 | BnaA09g44510.1D2 |
| H44 | BnaC08g32450.1D2 | BnaA09g44550.1D2 |
| H44 | BnaC08g32470.1D2 | BnaA09g44570.1D2 |
| H44 | BnaC08g32510.1D2 | BnaA09g44620.1D2 |
| H44 | BnaC08g32550.1D2 | BnaA09g44700.1D2 |
| H44 | BnaC08g32600.1D2 | BnaA09g44790.1D2 |
| H44 | BnaC08g32620.1D2 | BnaA09g44830.1D2 |
| H44 | BnaC08g32630.1D2 | BnaA09g44840.1D2 |
| H44 | BnaC08g32640.1D2 | BnaA09g44840.1D2 |
| H44 | BnaC08g32660.1D2 | BnaA09g44880.1D2 |
| H44 | BnaC08g32670.1D2 | BnaA09g44890.1D2 |
| H44 | BnaC08g32750.1D2 | BnaA09g46540.1D2 |
| H44 | BnaC08g32800.1D2 | BnaA09g44980.1D2 |
| H44 | BnaC08g32810.1D2 | BnaA09g45000.1D2 |
| H44 | BnaC08g32820.1D2 | BnaA09g45010.1D2 |
| H44 | BnaC08g32830.1D2 | BnaA09g45020.1D2 |
| H44 | BnaC08g32940.1D2 | BnaA09g45120.1D2 |
| H44 | BnaC08g33150.1D2 | BnaA09g45330.1D2 |
| H44 | BnaC08g33230.1D2 | BnaA09g45390.1D2 |
| H44 | BnaC08g33280.1D2 | BnaA09g45430.1D2 |

|     |                  |                  |
|-----|------------------|------------------|
| H44 | BnaC08g33300.1D2 | BnaA09g45450.1D2 |
| H44 | BnaC08g33370.1D2 | BnaA09g45460.1D2 |
| H44 | BnaC08g33440.1D2 | BnaA09g45520.1D2 |
| H44 | BnaC08g33450.1D2 | BnaA09g45530.1D2 |
| H44 | BnaC08g35200.1D2 | BnaA09g44960.1D2 |
| H44 | BnaC08g35350.1D2 | BnaA09g42360.1D2 |
| H44 | BnaC08g35360.1D2 | BnaA09g42380.1D2 |
| H44 | BnaC08g38690.1D2 | BnaA09g52170.1D2 |
| H44 | BnaC08g38870.1D2 | BnaA09g51990.1D2 |
| H44 | BnaC08g38920.1D2 | BnaA09g51940.1D2 |
| H44 | BnaC08g38970.1D2 | BnaA09g51730.1D2 |
| H44 | BnaC08g39000.1D2 | BnaA09g51900.1D2 |
| H44 | BnaC08g39090.1D2 | BnaA09g51170.1D2 |
| H44 | BnaC08g39220.1D2 | BnaA09g51550.1D2 |
| H44 | BnaC08g39240.1D2 | BnaA09g51540.1D2 |
| H44 | BnaC08g39260.1D2 | BnaA09g51520.1D2 |
| H44 | BnaC08g39270.1D2 | BnaA09g51510.1D2 |
| H44 | BnaC08g39320.1D2 | BnaA09g51120.1D2 |
| H44 | BnaC08g39340.1D2 | BnaA09g51110.1D2 |
| H44 | BnaC08g39460.1D2 | BnaA09g50990.1D2 |
| H44 | BnaC08g39510.1D2 | BnaA09g50940.1D2 |
| H44 | BnaC08g39540.1D2 | BnaA09g50920.1D2 |
| H44 | BnaC08g39590.1D2 | BnaA09g50870.1D2 |
| H44 | BnaC08g40500.1D2 | BnaA09g51810.1D2 |
| H44 | BnaC08g40520.1D2 | BnaA09g51820.1D2 |
| H44 | BnaC08g40610.1D2 | BnaA09g52680.1D2 |
| H44 | BnaC08g40630.1D2 | BnaA09g52710.1D2 |
| H44 | BnaC08g40640.1D2 | BnaA09g52720.1D2 |
| H44 | BnaC08g40690.1D2 | BnaA09g52770.1D2 |
| H44 | BnaC08g40710.1D2 | BnaA09g51140.1D2 |
| H44 | BnaC08g40720.1D2 | BnaA09g52420.1D2 |
| H44 | BnaC08g40900.1D2 | BnaA09g52210.1D2 |
| H44 | BnaC08g40910.1D2 | BnaA09g52220.1D2 |
| H44 | BnaC08g40920.1D2 | BnaA09g52230.1D2 |
| H44 | BnaC08g40930.1D2 | BnaA09g52240.1D2 |
| H44 | BnaC08g40950.1D2 | BnaA09g52260.1D2 |
| H44 | BnaC08g41010.1D2 | BnaA09g52260.1D2 |
| H44 | BnaC08g41050.1D2 | BnaA09g52310.1D2 |
| H44 | BnaC08g41080.1D2 | BnaA09g52350.1D2 |
| H44 | BnaC08g41090.1D2 | BnaA09g52360.1D2 |
| H44 | BnaC08g41100.1D2 | BnaA09g52370.1D2 |
| H44 | BnaC08g41210.1D2 | BnaA09g52470.1D2 |
| H44 | BnaC08g41260.1D2 | BnaA09g52540.1D2 |
| H44 | BnaC08g41370.1D2 | BnaA09g52800.1D2 |
| H44 | BnaC08g41380.1D2 | BnaA09g52810.1D2 |

**List of HE genes (C09 to A09)**

| <b>Accession</b> | <b>Lost gene</b> | <b>Duplicated HE gene</b> |
|------------------|------------------|---------------------------|
| Dippes           | BnaC09g00040.1D2 | BnaA09g01590.1D2          |
| Dippes           | BnaC09g00060.1D2 | BnaA09g01630.1D2          |
| Dippes           | BnaC09g00070.1D2 | BnaA09g01640.1D2          |



|        |                  |                  |
|--------|------------------|------------------|
| Dippes | BnaC09g00080.1D2 | BnaA09g01650.1D2 |
| Dippes | BnaC09g00170.1D2 | BnaA09g01720.1D2 |
| Dippes | BnaC09g00180.1D2 | BnaA09g01740.1D2 |
| Dippes | BnaC09g00190.1D2 | BnaA09g01750.1D2 |
| Dippes | BnaC09g00200.1D2 | BnaA09g01760.1D2 |
| Dippes | BnaC09g00220.1D2 | BnaA09g01780.1D2 |
| Dippes | BnaC09g00270.1D2 | BnaA09g01810.1D2 |
| Dippes | BnaC09g00280.1D2 | BnaA09g01820.1D2 |
| Dippes | BnaC09g00320.1D2 | BnaA09g01850.1D2 |
| Dippes | BnaC09g00330.1D2 | BnaA09g01860.1D2 |
| Dippes | BnaC09g00340.1D2 | BnaA09g01870.1D2 |
| Dippes | BnaC09g00360.1D2 | BnaA09g01890.1D2 |
| Dippes | BnaC09g00370.1D2 | BnaA09g01900.1D2 |
| Dippes | BnaC09g00420.1D2 | BnaA09g01910.1D2 |
| Dippes | BnaC09g00440.1D2 | BnaA09g01920.1D2 |
| Dippes | BnaC09g00460.1D2 | BnaA09g01950.1D2 |
| Dippes | BnaC09g00480.1D2 | BnaA09g01960.1D2 |
| Dippes | BnaC09g00510.1D2 | BnaA09g01990.1D2 |
| Dippes | BnaC09g00520.1D2 | BnaA09g02000.1D2 |
| Dippes | BnaC09g00540.1D2 | BnaA09g02010.1D2 |
| Dippes | BnaC09g00600.1D2 | BnaA09g02090.1D2 |
| Dippes | BnaC09g00800.1D2 | BnaA09g02280.1D2 |
| Dippes | BnaC09g00900.1D2 | BnaA09g02050.1D2 |
| Dippes | BnaC09g01050.1D2 | BnaA09g01550.1D2 |
| Dippes | BnaC09g01080.1D2 | BnaA09g01520.1D2 |
| Dippes | BnaC09g01090.1D2 | BnaA09g01510.1D2 |
| Dippes | BnaC09g01100.1D2 | BnaA09g01500.1D2 |
| Dippes | BnaC09g01130.1D2 | BnaA09g01460.1D2 |
| Dippes | BnaC09g01140.1D2 | BnaA09g01440.1D2 |
| Dippes | BnaC09g01180.1D2 | BnaA09g00940.1D2 |
| Dippes | BnaC09g01190.1D2 | BnaA09g00950.1D2 |
| Dippes | BnaC09g01190.1D2 | BnaA09g00960.1D2 |
| Dippes | BnaC09g01470.1D2 | BnaA09g02740.1D2 |
| Dippes | BnaC09g01480.1D2 | BnaA09g02770.1D2 |
| Dippes | BnaC09g01490.1D2 | BnaA09g02780.1D2 |
| Dippes | BnaC09g01500.1D2 | BnaA09g02790.1D2 |
| Dippes | BnaC09g01660.1D2 | BnaA09g02930.1D2 |
| Dippes | BnaC09g01720.1D2 | BnaA09g02980.1D2 |
| Dippes | BnaC09g01730.1D2 | BnaA09g02990.1D2 |
| Dippes | BnaC09g01740.1D2 | BnaA09g03000.1D2 |
| Dippes | BnaC09g01750.1D2 | BnaA09g03010.1D2 |
| Dippes | BnaC09g01770.1D2 | BnaA09g03020.1D2 |
| Dippes | BnaC09g01780.1D2 | BnaA09g03030.1D2 |
| Dippes | BnaC09g01850.1D2 | BnaA09g03150.1D2 |
| Dippes | BnaC09g01910.1D2 | BnaA09g03210.1D2 |
| Dippes | BnaC09g01930.1D2 | BnaA09g03230.1D2 |
| Dippes | BnaC09g02110.1D2 | BnaA09g03550.1D2 |
| Dippes | BnaC09g02180.1D2 | BnaA09g03610.1D2 |
| Dippes | BnaC09g02200.1D2 | BnaA09g03630.1D2 |
| Dippes | BnaC09g02260.1D2 | BnaA09g03690.1D2 |
| Dippes | BnaC09g02290.1D2 | BnaA09g03730.1D2 |

|              |                  |                  |
|--------------|------------------|------------------|
| Dippes       | BnaC09g02310.1D2 | BnaA09g03750.1D2 |
| Dippes       | BnaC09g02360.1D2 | BnaA09g03770.1D2 |
| Dippes       | BnaC09g03040.1D2 | BnaA09g03300.1D2 |
| Dippes       | BnaC09g03130.1D2 | BnaA09g03310.1D2 |
| Dippes       | BnaC09g03180.1D2 | BnaA09g01410.1D2 |
| Dippes       | BnaC09g03220.1D2 | BnaA09g01370.1D2 |
| Dippes       | BnaC09g10800.1D2 | BnaA09g11280.1D2 |
| Dippes       | BnaC09g11010.1D2 | BnaA09g11370.1D2 |
| Dippes       | BnaC09g11060.1D2 | BnaA09g11390.1D2 |
| EVVIN        | BnaC09g00040.1D2 | BnaA09g01590.1D2 |
| EVVIN        | BnaC09g00060.1D2 | BnaA09g01630.1D2 |
| EVVIN        | BnaC09g00080.1D2 | BnaA09g01650.1D2 |
| EVVIN        | BnaC09g00180.1D2 | BnaA09g01740.1D2 |
| EVVIN        | BnaC09g00190.1D2 | BnaA09g01750.1D2 |
| EVVIN        | BnaC09g00200.1D2 | BnaA09g01760.1D2 |
| EVVIN        | BnaC09g00220.1D2 | BnaA09g01780.1D2 |
| EVVIN        | BnaC09g00280.1D2 | BnaA09g01820.1D2 |
| EVVIN        | BnaC09g00330.1D2 | BnaA09g01860.1D2 |
| EVVIN        | BnaC09g00480.1D2 | BnaA09g01960.1D2 |
| EVVIN        | BnaC09g00520.1D2 | BnaA09g02000.1D2 |
| EVVIN        | BnaC09g00640.1D2 | BnaA09g02130.1D2 |
| EVVIN        | BnaC09g00790.1D2 | BnaA09g02270.1D2 |
| EVVIN        | BnaC09g00800.1D2 | BnaA09g02280.1D2 |
| EVVIN        | BnaC09g01040.1D2 | BnaA09g04210.1D2 |
| EVVIN        | BnaC09g01130.1D2 | BnaA09g01460.1D2 |
| EVVIN        | BnaC09g01140.1D2 | BnaA09g01440.1D2 |
| EVVIN        | BnaC09g01160.1D2 | BnaA09g00920.1D2 |
| EVVIN        | BnaC09g01190.1D2 | BnaA09g00950.1D2 |
| EVVIN        | BnaC09g01190.1D2 | BnaA09g00960.1D2 |
| EVVIN        | BnaC09g03180.1D2 | BnaA09g01410.1D2 |
| GLuesewitzer | BnaC09g01470.1D2 | BnaA09g02740.1D2 |
| GLuesewitzer | BnaC09g01480.1D2 | BnaA09g02770.1D2 |
| GLuesewitzer | BnaC09g01490.1D2 | BnaA09g02780.1D2 |
| GLuesewitzer | BnaC09g01500.1D2 | BnaA09g02790.1D2 |
| GLuesewitzer | BnaC09g01660.1D2 | BnaA09g02930.1D2 |
| GLuesewitzer | BnaC09g01740.1D2 | BnaA09g03000.1D2 |
| GLuesewitzer | BnaC09g01750.1D2 | BnaA09g03010.1D2 |
| GLuesewitzer | BnaC09g01770.1D2 | BnaA09g03020.1D2 |
| GLuesewitzer | BnaC09g01780.1D2 | BnaA09g03030.1D2 |
| GLuesewitzer | BnaC09g01850.1D2 | BnaA09g03150.1D2 |
| GLuesewitzer | BnaC09g01910.1D2 | BnaA09g03210.1D2 |
| GLuesewitzer | BnaC09g01930.1D2 | BnaA09g03230.1D2 |
| GLuesewitzer | BnaC09g02180.1D2 | BnaA09g03610.1D2 |
| GLuesewitzer | BnaC09g02200.1D2 | BnaA09g03630.1D2 |
| GLuesewitzer | BnaC09g02290.1D2 | BnaA09g03730.1D2 |
| GLuesewitzer | BnaC09g02310.1D2 | BnaA09g03750.1D2 |
| GLuesewitzer | BnaC09g02360.1D2 | BnaA09g03770.1D2 |
| GLuesewitzer | BnaC09g02440.1D2 | BnaA09g03890.1D2 |
| GLuesewitzer | BnaC09g02480.1D2 | BnaA09g03930.1D2 |
| GLuesewitzer | BnaC09g02580.1D2 | BnaA09g04130.1D2 |
| GLuesewitzer | BnaC09g02670.1D2 | BnaA09g04300.1D2 |

|              |                  |                  |
|--------------|------------------|------------------|
| GLuesewitzer | BnaC09g02920.1D2 | BnaA09g04540.1D2 |
| GLuesewitzer | BnaC09g03090.1D2 | BnaA09g03380.1D2 |
| GLuesewitzer | BnaC09g03130.1D2 | BnaA09g03310.1D2 |
| GLuesewitzer | BnaC09g03340.1D2 | BnaA09g04750.1D2 |
| GLuesewitzer | BnaC09g03730.1D2 | BnaA09g05130.1D2 |
| GLuesewitzer | BnaC09g04270.1D2 | BnaA09g05630.1D2 |
| GLuesewitzer | BnaC09g08490.1D2 | BnaA09g10190.1D2 |
| GLuesewitzer | BnaC09g11010.1D2 | BnaA09g11370.1D2 |
| GSchnittkohl | BnaC09g00040.1D2 | BnaA09g01590.1D2 |
| GSchnittkohl | BnaC09g00060.1D2 | BnaA09g01630.1D2 |
| GSchnittkohl | BnaC09g00070.1D2 | BnaA09g01640.1D2 |
| GSchnittkohl | BnaC09g00180.1D2 | BnaA09g01740.1D2 |
| GSchnittkohl | BnaC09g00220.1D2 | BnaA09g01780.1D2 |
| GSchnittkohl | BnaC09g00250.1D2 | BnaA09g01790.1D2 |
| GSchnittkohl | BnaC09g00280.1D2 | BnaA09g01820.1D2 |
| GSchnittkohl | BnaC09g00320.1D2 | BnaA09g01850.1D2 |
| GSchnittkohl | BnaC09g00330.1D2 | BnaA09g01860.1D2 |
| GSchnittkohl | BnaC09g00440.1D2 | BnaA09g01920.1D2 |
| GSchnittkohl | BnaC09g00460.1D2 | BnaA09g01950.1D2 |
| GSchnittkohl | BnaC09g00480.1D2 | BnaA09g01960.1D2 |
| GSchnittkohl | BnaC09g00520.1D2 | BnaA09g02000.1D2 |
| GSchnittkohl | BnaC09g00730.1D2 | BnaA09g02220.1D2 |
| GSchnittkohl | BnaC09g00800.1D2 | BnaA09g02280.1D2 |
| GSchnittkohl | BnaC09g00900.1D2 | BnaA09g02050.1D2 |
| GSchnittkohl | BnaC09g00990.1D2 | BnaA09g02430.1D2 |
| GSchnittkohl | BnaC09g01010.1D2 | BnaA09g04200.1D2 |
| GSchnittkohl | BnaC09g01090.1D2 | BnaA09g01510.1D2 |
| GSchnittkohl | BnaC09g01130.1D2 | BnaA09g01460.1D2 |
| GSchnittkohl | BnaC09g01190.1D2 | BnaA09g00950.1D2 |
| GSchnittkohl | BnaC09g01190.1D2 | BnaA09g00960.1D2 |
| GSchnittkohl | BnaC09g01290.1D2 | BnaA09g02450.1D2 |
| GSchnittkohl | BnaC09g01440.1D2 | BnaA09g02680.1D2 |
| GSchnittkohl | BnaC09g01470.1D2 | BnaA09g02740.1D2 |
| GSchnittkohl | BnaC09g01480.1D2 | BnaA09g02770.1D2 |
| GSchnittkohl | BnaC09g01490.1D2 | BnaA09g02780.1D2 |
| GSchnittkohl | BnaC09g01500.1D2 | BnaA09g02790.1D2 |
| GSchnittkohl | BnaC09g01530.1D2 | BnaA09g02820.1D2 |
| GSchnittkohl | BnaC09g01540.1D2 | BnaA09g02840.1D2 |
| GSchnittkohl | BnaC09g01610.1D2 | BnaA09g02910.1D2 |
| GSchnittkohl | BnaC09g01660.1D2 | BnaA09g02930.1D2 |
| GSchnittkohl | BnaC09g01720.1D2 | BnaA09g02980.1D2 |
| GSchnittkohl | BnaC09g01730.1D2 | BnaA09g02990.1D2 |
| GSchnittkohl | BnaC09g01740.1D2 | BnaA09g03000.1D2 |
| GSchnittkohl | BnaC09g01750.1D2 | BnaA09g03010.1D2 |
| GSchnittkohl | BnaC09g01770.1D2 | BnaA09g03020.1D2 |
| GSchnittkohl | BnaC09g01780.1D2 | BnaA09g03030.1D2 |
| GSchnittkohl | BnaC09g01830.1D2 | BnaA09g03120.1D2 |
| GSchnittkohl | BnaC09g01850.1D2 | BnaA09g03150.1D2 |
| GSchnittkohl | BnaC09g01860.1D2 | BnaA09g03160.1D2 |
| GSchnittkohl | BnaC09g01880.1D2 | BnaA09g03180.1D2 |
| GSchnittkohl | BnaC09g01910.1D2 | BnaA09g03210.1D2 |

|              |                  |                  |
|--------------|------------------|------------------|
| GSchnittkohl | BnaC09g01930.1D2 | BnaA09g03230.1D2 |
| GSchnittkohl | BnaC09g01960.1D2 | BnaA09g03260.1D2 |
| GSchnittkohl | BnaC09g02060.1D2 | BnaA09g03450.1D2 |
| GSchnittkohl | BnaC09g02070.1D2 | BnaA09g03460.1D2 |
| GSchnittkohl | BnaC09g02180.1D2 | BnaA09g03610.1D2 |
| GSchnittkohl | BnaC09g02200.1D2 | BnaA09g03630.1D2 |
| GSchnittkohl | BnaC09g02290.1D2 | BnaA09g03730.1D2 |
| GSchnittkohl | BnaC09g02360.1D2 | BnaA09g03770.1D2 |
| GSchnittkohl | BnaC09g03040.1D2 | BnaA09g03300.1D2 |
| GSchnittkohl | BnaC09g03090.1D2 | BnaA09g03380.1D2 |
| GSchnittkohl | BnaC09g03130.1D2 | BnaA09g03310.1D2 |
| GSchnittkohl | BnaC09g03180.1D2 | BnaA09g01410.1D2 |
| Jupiter      | BnaC09g00060.1D2 | BnaA09g01630.1D2 |
| Jupiter      | BnaC09g00070.1D2 | BnaA09g01640.1D2 |
| Jupiter      | BnaC09g00080.1D2 | BnaA09g01650.1D2 |
| Jupiter      | BnaC09g00110.1D2 | BnaA09g01670.1D2 |
| Jupiter      | BnaC09g00120.1D2 | BnaA09g01680.1D2 |
| Jupiter      | BnaC09g00170.1D2 | BnaA09g01720.1D2 |
| Jupiter      | BnaC09g00180.1D2 | BnaA09g01740.1D2 |
| Jupiter      | BnaC09g00190.1D2 | BnaA09g01750.1D2 |
| Jupiter      | BnaC09g00220.1D2 | BnaA09g01780.1D2 |
| Jupiter      | BnaC09g00250.1D2 | BnaA09g01790.1D2 |
| Jupiter      | BnaC09g00270.1D2 | BnaA09g01810.1D2 |
| Jupiter      | BnaC09g00280.1D2 | BnaA09g01820.1D2 |
| Jupiter      | BnaC09g00320.1D2 | BnaA09g01850.1D2 |
| Jupiter      | BnaC09g00440.1D2 | BnaA09g01920.1D2 |
| Jupiter      | BnaC09g00480.1D2 | BnaA09g01960.1D2 |
| Jupiter      | BnaC09g00510.1D2 | BnaA09g01990.1D2 |
| Jupiter      | BnaC09g00520.1D2 | BnaA09g02000.1D2 |
| Jupiter      | BnaC09g00540.1D2 | BnaA09g02010.1D2 |
| Jupiter      | BnaC09g00810.1D2 | BnaA09g02290.1D2 |
| Jupiter      | BnaC09g00900.1D2 | BnaA09g02050.1D2 |
| Jupiter      | BnaC09g00930.1D2 | BnaA09g02370.1D2 |
| Jupiter      | BnaC09g01010.1D2 | BnaA09g04190.1D2 |
| Jupiter      | BnaC09g01010.1D2 | BnaA09g04200.1D2 |
| Jupiter      | BnaC09g01030.1D2 | BnaA09g04240.1D2 |
| Jupiter      | BnaC09g01040.1D2 | BnaA09g04210.1D2 |
| Jupiter      | BnaC09g01050.1D2 | BnaA09g01550.1D2 |
| Jupiter      | BnaC09g01140.1D2 | BnaA09g01440.1D2 |
| Jupiter      | BnaC09g01190.1D2 | BnaA09g00950.1D2 |
| Jupiter      | BnaC09g01190.1D2 | BnaA09g00960.1D2 |
| Jupiter      | BnaC09g01290.1D2 | BnaA09g02450.1D2 |
| Jupiter      | BnaC09g01310.1D2 | BnaA09g02480.1D2 |
| Jupiter      | BnaC09g01340.1D2 | BnaA09g02510.1D2 |
| Jupiter      | BnaC09g01360.1D2 | BnaA09g02550.1D2 |
| Jupiter      | BnaC09g01380.1D2 | BnaA09g02580.1D2 |
| Jupiter      | BnaC09g01440.1D2 | BnaA09g02680.1D2 |
| Jupiter      | BnaC09g01470.1D2 | BnaA09g02740.1D2 |
| Jupiter      | BnaC09g01490.1D2 | BnaA09g02780.1D2 |
| Jupiter      | BnaC09g01500.1D2 | BnaA09g02790.1D2 |
| Jupiter      | BnaC09g01530.1D2 | BnaA09g02820.1D2 |

|         |                  |                  |
|---------|------------------|------------------|
| Jupiter | BnaC09g01540.1D2 | BnaA09g02840.1D2 |
| Jupiter | BnaC09g01610.1D2 | BnaA09g02910.1D2 |
| Jupiter | BnaC09g01660.1D2 | BnaA09g02930.1D2 |
| Jupiter | BnaC09g01720.1D2 | BnaA09g02980.1D2 |
| Jupiter | BnaC09g01740.1D2 | BnaA09g03000.1D2 |
| Jupiter | BnaC09g01770.1D2 | BnaA09g03020.1D2 |
| Jupiter | BnaC09g01780.1D2 | BnaA09g03030.1D2 |
| Jupiter | BnaC09g01830.1D2 | BnaA09g03120.1D2 |
| Jupiter | BnaC09g01910.1D2 | BnaA09g03210.1D2 |
| Jupiter | BnaC09g01930.1D2 | BnaA09g03230.1D2 |
| Jupiter | BnaC09g03090.1D2 | BnaA09g03380.1D2 |
| Jupiter | BnaC09g03130.1D2 | BnaA09g03310.1D2 |
| Jupiter | BnaC09g03190.1D2 | BnaA09g01400.1D2 |
| Jupiter | BnaC09g03210.1D2 | BnaA09g01370.1D2 |
| Major   | BnaC09g00040.1D2 | BnaA09g01590.1D2 |
| Major   | BnaC09g00060.1D2 | BnaA09g01630.1D2 |
| Major   | BnaC09g00070.1D2 | BnaA09g01640.1D2 |
| Major   | BnaC09g00080.1D2 | BnaA09g01650.1D2 |
| Major   | BnaC09g00180.1D2 | BnaA09g01740.1D2 |
| Major   | BnaC09g00190.1D2 | BnaA09g01750.1D2 |
| Major   | BnaC09g00200.1D2 | BnaA09g01760.1D2 |
| Major   | BnaC09g00220.1D2 | BnaA09g01780.1D2 |
| Major   | BnaC09g00250.1D2 | BnaA09g01790.1D2 |
| Major   | BnaC09g00280.1D2 | BnaA09g01820.1D2 |
| Major   | BnaC09g00320.1D2 | BnaA09g01850.1D2 |
| Major   | BnaC09g00460.1D2 | BnaA09g01950.1D2 |
| Major   | BnaC09g00480.1D2 | BnaA09g01960.1D2 |
| Major   | BnaC09g00520.1D2 | BnaA09g02000.1D2 |
| Major   | BnaC09g00800.1D2 | BnaA09g02280.1D2 |
| Major   | BnaC09g00810.1D2 | BnaA09g02290.1D2 |
| Major   | BnaC09g00860.1D2 | BnaA09g02330.1D2 |
| Major   | BnaC09g01190.1D2 | BnaA09g00950.1D2 |
| Major   | BnaC09g01190.1D2 | BnaA09g00960.1D2 |
| Major   | BnaC09g01290.1D2 | BnaA09g02450.1D2 |
| Major   | BnaC09g01310.1D2 | BnaA09g02480.1D2 |
| Major   | BnaC09g01440.1D2 | BnaA09g02680.1D2 |
| Major   | BnaC09g01480.1D2 | BnaA09g02770.1D2 |
| Major   | BnaC09g01490.1D2 | BnaA09g02780.1D2 |
| Major   | BnaC09g01500.1D2 | BnaA09g02790.1D2 |
| Major   | BnaC09g01530.1D2 | BnaA09g02820.1D2 |
| Major   | BnaC09g01540.1D2 | BnaA09g02840.1D2 |
| Major   | BnaC09g01610.1D2 | BnaA09g02910.1D2 |
| Major   | BnaC09g01660.1D2 | BnaA09g02930.1D2 |
| Major   | BnaC09g01740.1D2 | BnaA09g03000.1D2 |
| Major   | BnaC09g01750.1D2 | BnaA09g03010.1D2 |
| Major   | BnaC09g01770.1D2 | BnaA09g03020.1D2 |
| Major   | BnaC09g01780.1D2 | BnaA09g03030.1D2 |
| Major   | BnaC09g01790.1D2 | BnaA09g03090.1D2 |
| Major   | BnaC09g01830.1D2 | BnaA09g03120.1D2 |
| Major   | BnaC09g01850.1D2 | BnaA09g03150.1D2 |
| Major   | BnaC09g01860.1D2 | BnaA09g03160.1D2 |

|           |                  |                  |
|-----------|------------------|------------------|
| Major     | BnaC09g01880.1D2 | BnaA09g03180.1D2 |
| Major     | BnaC09g01910.1D2 | BnaA09g03210.1D2 |
| Major     | BnaC09g02070.1D2 | BnaA09g03460.1D2 |
| Major     | BnaC09g02110.1D2 | BnaA09g03550.1D2 |
| Major     | BnaC09g02180.1D2 | BnaA09g03610.1D2 |
| Major     | BnaC09g02200.1D2 | BnaA09g03630.1D2 |
| Major     | BnaC09g02290.1D2 | BnaA09g03730.1D2 |
| Major     | BnaC09g02310.1D2 | BnaA09g03750.1D2 |
| Major     | BnaC09g02360.1D2 | BnaA09g03770.1D2 |
| Major     | BnaC09g02480.1D2 | BnaA09g03930.1D2 |
| Major     | BnaC09g02520.1D2 | BnaA09g04070.1D2 |
| Major     | BnaC09g02540.1D2 | BnaA09g04080.1D2 |
| Major     | BnaC09g02580.1D2 | BnaA09g04130.1D2 |
| Major     | BnaC09g02600.1D2 | BnaA09g00870.1D2 |
| Major     | BnaC09g02610.1D2 | BnaA09g00860.1D2 |
| Major     | BnaC09g02650.1D2 | BnaA09g04280.1D2 |
| Major     | BnaC09g02670.1D2 | BnaA09g04300.1D2 |
| Major     | BnaC09g02680.1D2 | BnaA09g04320.1D2 |
| Major     | BnaC09g02910.1D2 | BnaA09g04530.1D2 |
| Major     | BnaC09g02920.1D2 | BnaA09g04540.1D2 |
| Major     | BnaC09g02960.1D2 | BnaA09g04590.1D2 |
| Major     | BnaC09g02970.1D2 | BnaA09g04600.1D2 |
| Major     | BnaC09g02980.1D2 | BnaA09g04610.1D2 |
| Major     | BnaC09g03000.1D2 | BnaA09g04640.1D2 |
| Major     | BnaC09g03040.1D2 | BnaA09g03300.1D2 |
| Major     | BnaC09g03170.1D2 | BnaA09g03350.1D2 |
| Major     | BnaC09g03180.1D2 | BnaA09g01410.1D2 |
| Sensation | BnaC09g02520.1D2 | BnaA09g04070.1D2 |
| Sensation | BnaC09g02540.1D2 | BnaA09g04080.1D2 |
| Sensation | BnaC09g02580.1D2 | BnaA09g04130.1D2 |
| Sensation | BnaC09g02600.1D2 | BnaA09g00870.1D2 |
| Sensation | BnaC09g02610.1D2 | BnaA09g00860.1D2 |
| Sensation | BnaC09g02650.1D2 | BnaA09g04280.1D2 |
| Sensation | BnaC09g02670.1D2 | BnaA09g04300.1D2 |
| Sensation | BnaC09g02680.1D2 | BnaA09g04320.1D2 |
| Sensation | BnaC09g02690.1D2 | BnaA09g04330.1D2 |
| Sensation | BnaC09g02760.1D2 | BnaA09g04380.1D2 |
| Sensation | BnaC09g02890.1D2 | BnaA09g04520.1D2 |
| Sensation | BnaC09g02900.1D2 | BnaA09g05730.1D2 |
| Sensation | BnaC09g02910.1D2 | BnaA09g04530.1D2 |
| Sensation | BnaC09g02920.1D2 | BnaA09g04540.1D2 |
| Sensation | BnaC09g03000.1D2 | BnaA09g04640.1D2 |
| Sensation | BnaC09g03180.1D2 | BnaA09g01410.1D2 |
| Sensation | BnaC09g03250.1D2 | BnaA09g01340.1D2 |
| Sensation | BnaC09g03500.1D2 | BnaA09g04890.1D2 |
| Sensation | BnaC09g03690.1D2 | BnaA09g05100.1D2 |
| Sensation | BnaC09g03710.1D2 | BnaA09g05120.1D2 |
| Sensation | BnaC09g03730.1D2 | BnaA09g05130.1D2 |
| Sensation | BnaC09g03750.1D2 | BnaA09g05140.1D2 |
| Sensation | BnaC09g03960.1D2 | BnaA09g05380.1D2 |
| Sensation | BnaC09g04140.1D2 | BnaA09g05510.1D2 |

|           |                  |                  |
|-----------|------------------|------------------|
| Sensation | BnaC09g04160.1D2 | BnaA09g05540.1D2 |
| Sensation | BnaC09g04270.1D2 | BnaA09g05630.1D2 |
| Sensation | BnaC09g04280.1D2 | BnaA09g05630.1D2 |
| Sensation | BnaC09g04340.1D2 | BnaA09g05680.1D2 |
| Sensation | BnaC09g04590.1D2 | BnaA09g05950.1D2 |
| Sensation | BnaC09g04870.1D2 | BnaA09g06260.1D2 |
| Sensation | BnaC09g05210.1D2 | BnaA09g06570.1D2 |
| Sensation | BnaC09g05290.1D2 | BnaA09g06650.1D2 |
| Sensation | BnaC09g05410.1D2 | BnaA09g06800.1D2 |
| Sensation | BnaC09g05430.1D2 | BnaA09g06810.1D2 |
| Sensation | BnaC09g05470.1D2 | BnaA09g06850.1D2 |
| Sensation | BnaC09g05600.1D2 | BnaA09g06750.1D2 |
| Sensation | BnaC09g05630.1D2 | BnaA09g06170.1D2 |
| Sensation | BnaC09g05730.1D2 | BnaA09g04700.1D2 |
| Sensation | BnaC09g05760.1D2 | BnaA09g06900.1D2 |
| Sensation | BnaC09g05760.1D2 | BnaA09g06910.1D2 |
| Sensation | BnaC09g05840.1D2 | BnaA09g06980.1D2 |
| Sensation | BnaC09g05960.1D2 | BnaA09g07070.1D2 |
| Sensation | BnaC09g06000.1D2 | BnaA09g07150.1D2 |
| Sensation | BnaC09g06020.1D2 | BnaA09g07160.1D2 |
| Sensation | BnaC09g06240.1D2 | BnaA09g07230.1D2 |
| Sensation | BnaC09g06250.1D2 | BnaA09g07250.1D2 |
| Sensation | BnaC09g06260.1D2 | BnaA09g07260.1D2 |
| Sensation | BnaC09g06520.1D2 | BnaA09g07490.1D2 |
| Sensation | BnaC09g06540.1D2 | BnaA09g07500.1D2 |
| Sensation | BnaC09g06590.1D2 | BnaA09g07540.1D2 |
| Sensation | BnaC09g06780.1D2 | BnaA09g07700.1D2 |
| Sensation | BnaC09g06790.1D2 | BnaA09g07710.1D2 |
| Sensation | BnaC09g06830.1D2 | BnaA09g07760.1D2 |
| Sensation | BnaC09g07050.1D2 | BnaA09g07910.1D2 |
| Sensation | BnaC09g07090.1D2 | BnaA09g07950.1D2 |
| Sensation | BnaC09g07130.1D2 | BnaA09g07980.1D2 |
| Sensation | BnaC09g07140.1D2 | BnaA09g07990.1D2 |
| Sensation | BnaC09g07150.1D2 | BnaA09g08000.1D2 |
| Sensation | BnaC09g07170.1D2 | BnaA09g08010.1D2 |
| Sensation | BnaC09g07350.1D2 | BnaA09g08170.1D2 |
| Sensation | BnaC09g07360.1D2 | BnaA09g08180.1D2 |
| Sensation | BnaC09g07430.1D2 | BnaA09g08250.1D2 |
| Sensation | BnaC09g07470.1D2 | BnaA09g08790.1D2 |
| Sensation | BnaC09g07640.1D2 | BnaA09g08310.1D2 |
| Sensation | BnaC09g07700.1D2 | BnaA09g08350.1D2 |
| Sensation | BnaC09g07710.1D2 | BnaA09g08360.1D2 |
| Sensation | BnaC09g07720.1D2 | BnaA09g08370.1D2 |
| Sensation | BnaC09g08510.1D2 | BnaA09g07790.1D2 |
| Sensation | BnaC09g09350.1D2 | BnaA09g07100.1D2 |
| Sensation | BnaC09g39700.1D2 | BnaA09g08860.1D2 |
| Wotan     | BnaC09g00040.1D2 | BnaA09g01590.1D2 |
| Wotan     | BnaC09g00060.1D2 | BnaA09g01630.1D2 |
| Wotan     | BnaC09g00170.1D2 | BnaA09g01720.1D2 |
| Wotan     | BnaC09g00180.1D2 | BnaA09g01740.1D2 |
| Wotan     | BnaC09g00190.1D2 | BnaA09g01750.1D2 |

|       |                  |                  |
|-------|------------------|------------------|
| Wotan | BnaC09g00200.1D2 | BnaA09g01760.1D2 |
| Wotan | BnaC09g00220.1D2 | BnaA09g01780.1D2 |
| Wotan | BnaC09g00250.1D2 | BnaA09g01790.1D2 |
| Wotan | BnaC09g00270.1D2 | BnaA09g01810.1D2 |
| Wotan | BnaC09g00280.1D2 | BnaA09g01820.1D2 |
| Wotan | BnaC09g00320.1D2 | BnaA09g01850.1D2 |
| Wotan | BnaC09g00440.1D2 | BnaA09g01920.1D2 |
| Wotan | BnaC09g00460.1D2 | BnaA09g01950.1D2 |
| Wotan | BnaC09g00510.1D2 | BnaA09g01990.1D2 |
| Wotan | BnaC09g00520.1D2 | BnaA09g02000.1D2 |
| Wotan | BnaC09g00540.1D2 | BnaA09g02010.1D2 |
| Wotan | BnaC09g00620.1D2 | BnaA09g02110.1D2 |
| Wotan | BnaC09g00800.1D2 | BnaA09g02280.1D2 |
| Wotan | BnaC09g01010.1D2 | BnaA09g04200.1D2 |
| Wotan | BnaC09g01030.1D2 | BnaA09g04240.1D2 |
| Wotan | BnaC09g01040.1D2 | BnaA09g04210.1D2 |
| Wotan | BnaC09g01130.1D2 | BnaA09g01460.1D2 |
| Wotan | BnaC09g01140.1D2 | BnaA09g01440.1D2 |
| Wotan | BnaC09g01180.1D2 | BnaA09g00940.1D2 |
| Wotan | BnaC09g01290.1D2 | BnaA09g02450.1D2 |
| Wotan | BnaC09g01310.1D2 | BnaA09g02480.1D2 |
| Wotan | BnaC09g01340.1D2 | BnaA09g02510.1D2 |
| Wotan | BnaC09g01470.1D2 | BnaA09g02740.1D2 |
| Wotan | BnaC09g01480.1D2 | BnaA09g02770.1D2 |
| Wotan | BnaC09g01490.1D2 | BnaA09g02780.1D2 |
| Wotan | BnaC09g01500.1D2 | BnaA09g02790.1D2 |
| Wotan | BnaC09g01530.1D2 | BnaA09g02820.1D2 |
| Wotan | BnaC09g01540.1D2 | BnaA09g02840.1D2 |
| Wotan | BnaC09g01660.1D2 | BnaA09g02930.1D2 |
| Wotan | BnaC09g01730.1D2 | BnaA09g02990.1D2 |
| Wotan | BnaC09g01740.1D2 | BnaA09g03000.1D2 |
| Wotan | BnaC09g01750.1D2 | BnaA09g03010.1D2 |
| Wotan | BnaC09g01770.1D2 | BnaA09g03020.1D2 |
| Wotan | BnaC09g01780.1D2 | BnaA09g03030.1D2 |
| Wotan | BnaC09g01850.1D2 | BnaA09g03150.1D2 |
| Wotan | BnaC09g01910.1D2 | BnaA09g03210.1D2 |
| Wotan | BnaC09g01930.1D2 | BnaA09g03230.1D2 |
| Wotan | BnaC09g02030.1D2 | BnaA09g03420.1D2 |
| Wotan | BnaC09g02070.1D2 | BnaA09g03460.1D2 |
| Wotan | BnaC09g02110.1D2 | BnaA09g03550.1D2 |
| Wotan | BnaC09g02180.1D2 | BnaA09g03610.1D2 |
| Wotan | BnaC09g02200.1D2 | BnaA09g03630.1D2 |
| Wotan | BnaC09g02290.1D2 | BnaA09g03730.1D2 |
| Wotan | BnaC09g02310.1D2 | BnaA09g03750.1D2 |
| Wotan | BnaC09g02360.1D2 | BnaA09g03770.1D2 |
| Wotan | BnaC09g03040.1D2 | BnaA09g03300.1D2 |
| Wotan | BnaC09g03090.1D2 | BnaA09g03380.1D2 |
| Wotan | BnaC09g03130.1D2 | BnaA09g03310.1D2 |
| Wotan | BnaC09g03170.1D2 | BnaA09g03350.1D2 |
| Wotan | BnaC09g03180.1D2 | BnaA09g01410.1D2 |
| Wotan | BnaC09g10780.1D2 | BnaA09g11300.1D2 |



|       |                  |                  |
|-------|------------------|------------------|
| Wotan | BnaC09g10800.1D2 | BnaA09g11280.1D2 |
| Wotan | BnaC09g11010.1D2 | BnaA09g11370.1D2 |
| Wotan | BnaC09g11040.1D2 | BnaA09g11380.1D2 |
| Wotan | BnaC09g11060.1D2 | BnaA09g11390.1D2 |
| Wotan | BnaC09g11200.1D2 | BnaA09g11510.1D2 |
| H149  | BnaC09g02690.1D2 | BnaA09g04330.1D2 |
| H149  | BnaC09g03340.1D2 | BnaA09g04750.1D2 |
| H149  | BnaC09g03380.1D2 | BnaA09g04770.1D2 |
| H149  | BnaC09g03410.1D2 | BnaA09g04790.1D2 |
| H149  | BnaC09g03500.1D2 | BnaA09g04890.1D2 |
| H149  | BnaC09g03710.1D2 | BnaA09g05120.1D2 |
| H149  | BnaC09g03730.1D2 | BnaA09g05130.1D2 |
| H149  | BnaC09g03750.1D2 | BnaA09g05140.1D2 |
| H149  | BnaC09g03760.1D2 | BnaA09g05150.1D2 |
| H149  | BnaC09g03940.1D2 | BnaA09g05350.1D2 |
| H149  | BnaC09g04160.1D2 | BnaA09g05540.1D2 |
| H149  | BnaC09g04650.1D2 | BnaA09g06030.1D2 |
| H149  | BnaC09g04660.1D2 | BnaA09g06040.1D2 |
| H149  | BnaC09g04730.1D2 | BnaA09g06100.1D2 |
| H149  | BnaC09g04740.1D2 | BnaA09g06110.1D2 |
| H149  | BnaC09g04890.1D2 | BnaA09g06280.1D2 |
| H149  | BnaC09g04900.1D2 | BnaA09g06290.1D2 |
| H149  | BnaC09g05030.1D2 | BnaA09g06350.1D2 |
| H149  | BnaC09g05080.1D2 | BnaA09g06450.1D2 |
| H149  | BnaC09g05290.1D2 | BnaA09g06650.1D2 |
| H149  | BnaC09g05360.1D2 | BnaA09g06700.1D2 |
| H149  | BnaC09g05430.1D2 | BnaA09g06810.1D2 |
| H149  | BnaC09g05470.1D2 | BnaA09g06850.1D2 |
| H44   | BnaC09g00190.1D2 | BnaA09g01750.1D2 |
| H44   | BnaC09g00200.1D2 | BnaA09g01760.1D2 |
| H44   | BnaC09g00220.1D2 | BnaA09g01780.1D2 |
| H44   | BnaC09g00250.1D2 | BnaA09g01790.1D2 |
| H44   | BnaC09g00360.1D2 | BnaA09g01890.1D2 |
| H44   | BnaC09g00440.1D2 | BnaA09g01920.1D2 |
| H44   | BnaC09g00480.1D2 | BnaA09g01960.1D2 |
| H44   | BnaC09g00520.1D2 | BnaA09g02000.1D2 |
| H44   | BnaC09g00600.1D2 | BnaA09g02090.1D2 |
| H44   | BnaC09g00640.1D2 | BnaA09g02130.1D2 |
| H44   | BnaC09g00800.1D2 | BnaA09g02280.1D2 |
| H44   | BnaC09g00810.1D2 | BnaA09g02290.1D2 |
| H44   | BnaC09g00820.1D2 | BnaA09g02300.1D2 |
| H44   | BnaC09g00900.1D2 | BnaA09g02050.1D2 |
| H44   | BnaC09g01160.1D2 | BnaA09g00920.1D2 |
| H44   | BnaC09g01190.1D2 | BnaA09g00950.1D2 |
| H44   | BnaC09g01190.1D2 | BnaA09g00960.1D2 |
| H44   | BnaC09g01210.1D2 | BnaA09g00960.1D2 |
| H44   | BnaC09g01470.1D2 | BnaA09g02740.1D2 |
| H44   | BnaC09g01490.1D2 | BnaA09g02780.1D2 |
| H44   | BnaC09g01740.1D2 | BnaA09g03000.1D2 |
| H44   | BnaC09g01830.1D2 | BnaA09g03120.1D2 |
| H44   | BnaC09g01910.1D2 | BnaA09g03210.1D2 |

|     |                  |                  |
|-----|------------------|------------------|
| H44 | BnaC09g01930.1D2 | BnaA09g03230.1D2 |
| H44 | BnaC09g02070.1D2 | BnaA09g03460.1D2 |
| H44 | BnaC09g02180.1D2 | BnaA09g03610.1D2 |
| H44 | BnaC09g02240.1D2 | BnaA09g03670.1D2 |
| H44 | BnaC09g02260.1D2 | BnaA09g03690.1D2 |
| H44 | BnaC09g02270.1D2 | BnaA09g03700.1D2 |
| H44 | BnaC09g02360.1D2 | BnaA09g03770.1D2 |
| H44 | BnaC09g02440.1D2 | BnaA09g03890.1D2 |
| H44 | BnaC09g02670.1D2 | BnaA09g04300.1D2 |
| H44 | BnaC09g02690.1D2 | BnaA09g04330.1D2 |
| H44 | BnaC09g02890.1D2 | BnaA09g04520.1D2 |
| H44 | BnaC09g02950.1D2 | BnaA09g04570.1D2 |
| H44 | BnaC09g03040.1D2 | BnaA09g03300.1D2 |
| H44 | BnaC09g03120.1D2 | BnaA09g03360.1D2 |
| H44 | BnaC09g03130.1D2 | BnaA09g03310.1D2 |
| H44 | BnaC09g03170.1D2 | BnaA09g03350.1D2 |
| H44 | BnaC09g03180.1D2 | BnaA09g01410.1D2 |
| H44 | BnaC09g03340.1D2 | BnaA09g04750.1D2 |
| H44 | BnaC09g03380.1D2 | BnaA09g04770.1D2 |
| H44 | BnaC09g03410.1D2 | BnaA09g04790.1D2 |
| H44 | BnaC09g03500.1D2 | BnaA09g04890.1D2 |
| H44 | BnaC09g03540.1D2 | BnaA09g04920.1D2 |
| H44 | BnaC09g03690.1D2 | BnaA09g05100.1D2 |
| H44 | BnaC09g03710.1D2 | BnaA09g05120.1D2 |
| H44 | BnaC09g03750.1D2 | BnaA09g05140.1D2 |
| H44 | BnaC09g03760.1D2 | BnaA09g05150.1D2 |
| H44 | BnaC09g03850.1D2 | BnaA09g05280.1D2 |
| H44 | BnaC09g03960.1D2 | BnaA09g05380.1D2 |
| H44 | BnaC09g03980.1D2 | BnaA09g05410.1D2 |
| H44 | BnaC09g04010.1D2 | BnaA09g05440.1D2 |
| H44 | BnaC09g04080.1D2 | BnaA09g05460.1D2 |
| H44 | BnaC09g04140.1D2 | BnaA09g05510.1D2 |
| H44 | BnaC09g04160.1D2 | BnaA09g05540.1D2 |
| H44 | BnaC09g04200.1D2 | BnaA09g05580.1D2 |
| H44 | BnaC09g04270.1D2 | BnaA09g05630.1D2 |
| H44 | BnaC09g04660.1D2 | BnaA09g06040.1D2 |
| H44 | BnaC09g04720.1D2 | BnaA09g06090.1D2 |
| H44 | BnaC09g04730.1D2 | BnaA09g06100.1D2 |
| H44 | BnaC09g04890.1D2 | BnaA09g06280.1D2 |
| H44 | BnaC09g04900.1D2 | BnaA09g06290.1D2 |
| H44 | BnaC09g05210.1D2 | BnaA09g06570.1D2 |
| H44 | BnaC09g05230.1D2 | BnaA09g06590.1D2 |
| H44 | BnaC09g05260.1D2 | BnaA09g06630.1D2 |
| H44 | BnaC09g05360.1D2 | BnaA09g06700.1D2 |
| H44 | BnaC09g05390.1D2 | BnaA09g06720.1D2 |
| H44 | BnaC09g05430.1D2 | BnaA09g06810.1D2 |
| H44 | BnaC09g05470.1D2 | BnaA09g06850.1D2 |
| H44 | BnaC09g05600.1D2 | BnaA09g06750.1D2 |
| H44 | BnaC09g05780.1D2 | BnaA09g06930.1D2 |
| H44 | BnaC09g05870.1D2 | BnaA09g06990.1D2 |
| H44 | BnaC09g05930.1D2 | BnaA09g07050.1D2 |

|             |                  |                  |
|-------------|------------------|------------------|
| H44         | BnaC09g06250.1D2 | BnaA09g07250.1D2 |
| H44         | BnaC09g06260.1D2 | BnaA09g07260.1D2 |
| H44         | BnaC09g06590.1D2 | BnaA09g07540.1D2 |
| H44         | BnaC09g06720.1D2 | BnaA09g07650.1D2 |
| H44         | BnaC09g06760.1D2 | BnaA09g07690.1D2 |
| H44         | BnaC09g06780.1D2 | BnaA09g07700.1D2 |
| H44         | BnaC09g06790.1D2 | BnaA09g07710.1D2 |
| H44         | BnaC09g06830.1D2 | BnaA09g07760.1D2 |
| H44         | BnaC09g06890.1D2 | BnaA09g08900.1D2 |
| H44         | BnaC09g06980.1D2 | BnaA09g07840.1D2 |
| H44         | BnaC09g06990.1D2 | BnaA09g07850.1D2 |
| H44         | BnaC09g07310.1D2 | BnaA09g08120.1D2 |
| H44         | BnaC09g07330.1D2 | BnaA09g08140.1D2 |
| H44         | BnaC09g07340.1D2 | BnaA09g08150.1D2 |
| H44         | BnaC09g07350.1D2 | BnaA09g08170.1D2 |
| H44         | BnaC09g07430.1D2 | BnaA09g08250.1D2 |
| H44         | BnaC09g07590.1D2 | BnaA09g08840.1D2 |
| H44         | BnaC09g07620.1D2 | BnaA09g08290.1D2 |
| H44         | BnaC09g07890.1D2 | BnaA09g08490.1D2 |
| H44         | BnaC09g07910.1D2 | BnaA09g08500.1D2 |
| H44         | BnaC09g08040.1D2 | BnaA09g08650.1D2 |
| H44         | BnaC09g08050.1D2 | BnaA09g08660.1D2 |
| H44         | BnaC09g08170.1D2 | BnaA09g09020.1D2 |
| H44         | BnaC09g08210.1D2 | BnaA09g09050.1D2 |
| H44         | BnaC09g08510.1D2 | BnaA09g07790.1D2 |
| Resyn_Go_S4 | BnaC09g00040.1D2 | BnaA09g01590.1D2 |
| Resyn_Go_S4 | BnaC09g00060.1D2 | BnaA09g01630.1D2 |
| Resyn_Go_S4 | BnaC09g00070.1D2 | BnaA09g01640.1D2 |
| Resyn_Go_S4 | BnaC09g00080.1D2 | BnaA09g01650.1D2 |
| Resyn_Go_S4 | BnaC09g00110.1D2 | BnaA09g01670.1D2 |
| Resyn_Go_S4 | BnaC09g00120.1D2 | BnaA09g01680.1D2 |
| Resyn_Go_S4 | BnaC09g00180.1D2 | BnaA09g01740.1D2 |
| Resyn_Go_S4 | BnaC09g00190.1D2 | BnaA09g01750.1D2 |
| Resyn_Go_S4 | BnaC09g00200.1D2 | BnaA09g01760.1D2 |
| Resyn_Go_S4 | BnaC09g00220.1D2 | BnaA09g01780.1D2 |
| Resyn_Go_S4 | BnaC09g00250.1D2 | BnaA09g01790.1D2 |
| Resyn_Go_S4 | BnaC09g00270.1D2 | BnaA09g01810.1D2 |
| Resyn_Go_S4 | BnaC09g00320.1D2 | BnaA09g01850.1D2 |
| Resyn_Go_S4 | BnaC09g00440.1D2 | BnaA09g01920.1D2 |
| Resyn_Go_S4 | BnaC09g00460.1D2 | BnaA09g01950.1D2 |
| Resyn_Go_S4 | BnaC09g00480.1D2 | BnaA09g01960.1D2 |
| Resyn_Go_S4 | BnaC09g00520.1D2 | BnaA09g02000.1D2 |
| Resyn_Go_S4 | BnaC09g00790.1D2 | BnaA09g02270.1D2 |
| Resyn_Go_S4 | BnaC09g00800.1D2 | BnaA09g02280.1D2 |
| Resyn_Go_S4 | BnaC09g00810.1D2 | BnaA09g02290.1D2 |
| Resyn_Go_S4 | BnaC09g00990.1D2 | BnaA09g02430.1D2 |
| Resyn_Go_S4 | BnaC09g01140.1D2 | BnaA09g01440.1D2 |
| Resyn_Go_S4 | BnaC09g01180.1D2 | BnaA09g00940.1D2 |
| Resyn_Go_S4 | BnaC09g01190.1D2 | BnaA09g00950.1D2 |
| Resyn_Go_S4 | BnaC09g01190.1D2 | BnaA09g00960.1D2 |
| Resyn_Go_S4 | BnaC09g01210.1D2 | BnaA09g00960.1D2 |

|             |                  |                  |
|-------------|------------------|------------------|
| Resyn_Go_S4 | BnaC09g01470.1D2 | BnaA09g02740.1D2 |
| Resyn_Go_S4 | BnaC09g01480.1D2 | BnaA09g02770.1D2 |
| Resyn_Go_S4 | BnaC09g01490.1D2 | BnaA09g02780.1D2 |
| Resyn_Go_S4 | BnaC09g01500.1D2 | BnaA09g02790.1D2 |
| Resyn_Go_S4 | BnaC09g01660.1D2 | BnaA09g02930.1D2 |
| Resyn_Go_S4 | BnaC09g01670.1D2 | BnaA09g02940.1D2 |
| Resyn_Go_S4 | BnaC09g01720.1D2 | BnaA09g02980.1D2 |
| Resyn_Go_S4 | BnaC09g01730.1D2 | BnaA09g02990.1D2 |
| Resyn_Go_S4 | BnaC09g01740.1D2 | BnaA09g03000.1D2 |
| Resyn_Go_S4 | BnaC09g01750.1D2 | BnaA09g03010.1D2 |
| Resyn_Go_S4 | BnaC09g01780.1D2 | BnaA09g03030.1D2 |
| Resyn_Go_S4 | BnaC09g01790.1D2 | BnaA09g03090.1D2 |
| Resyn_Go_S4 | BnaC09g01850.1D2 | BnaA09g03150.1D2 |
| Resyn_Go_S4 | BnaC09g01860.1D2 | BnaA09g03160.1D2 |
| Resyn_Go_S4 | BnaC09g01910.1D2 | BnaA09g03210.1D2 |
| Resyn_Go_S4 | BnaC09g01920.1D2 | BnaA09g03220.1D2 |
| Resyn_Go_S4 | BnaC09g01930.1D2 | BnaA09g03230.1D2 |
| Resyn_Go_S4 | BnaC09g02010.1D2 | BnaA09g03400.1D2 |
| Resyn_Go_S4 | BnaC09g02030.1D2 | BnaA09g03420.1D2 |
| Resyn_Go_S4 | BnaC09g02200.1D2 | BnaA09g03630.1D2 |
| Resyn_Go_S4 | BnaC09g02290.1D2 | BnaA09g03730.1D2 |
| Resyn_Go_S4 | BnaC09g02310.1D2 | BnaA09g03750.1D2 |
| Resyn_Go_S4 | BnaC09g02360.1D2 | BnaA09g03770.1D2 |
| Resyn_Go_S4 | BnaC09g02480.1D2 | BnaA09g03930.1D2 |
| Resyn_Go_S4 | BnaC09g02580.1D2 | BnaA09g04130.1D2 |
| Resyn_Go_S4 | BnaC09g02630.1D2 | BnaA09g00840.1D2 |
| Resyn_Go_S4 | BnaC09g02650.1D2 | BnaA09g04280.1D2 |
| Resyn_Go_S4 | BnaC09g02920.1D2 | BnaA09g04540.1D2 |
| Resyn_Go_S4 | BnaC09g02960.1D2 | BnaA09g04590.1D2 |
| Resyn_Go_S4 | BnaC09g03000.1D2 | BnaA09g04640.1D2 |
| Resyn_Go_S4 | BnaC09g03040.1D2 | BnaA09g03300.1D2 |
| Resyn_Go_S4 | BnaC09g03090.1D2 | BnaA09g03380.1D2 |
| Resyn_Go_S4 | BnaC09g03130.1D2 | BnaA09g03310.1D2 |
| Resyn_Go_S4 | BnaC09g03170.1D2 | BnaA09g03350.1D2 |
| Resyn_Go_S4 | BnaC09g03180.1D2 | BnaA09g01410.1D2 |
| Resyn_Go_S4 | BnaC09g03220.1D2 | BnaA09g01370.1D2 |
| Resyn_Go_S4 | BnaC09g03480.1D2 | BnaA09g04870.1D2 |
| Resyn_Go_S4 | BnaC09g03690.1D2 | BnaA09g05100.1D2 |
| Resyn_Go_S4 | BnaC09g03710.1D2 | BnaA09g05120.1D2 |
| Resyn_Go_S4 | BnaC09g03730.1D2 | BnaA09g05130.1D2 |
| Resyn_Go_S4 | BnaC09g03960.1D2 | BnaA09g05380.1D2 |
| Resyn_Go_S4 | BnaC09g04270.1D2 | BnaA09g05630.1D2 |
| Resyn_Go_S4 | BnaC09g04280.1D2 | BnaA09g05630.1D2 |
| Resyn_Go_S4 | BnaC09g04640.1D2 | BnaA09g06020.1D2 |
| Resyn_Go_S4 | BnaC09g04650.1D2 | BnaA09g06030.1D2 |
| Resyn_Go_S4 | BnaC09g04660.1D2 | BnaA09g06040.1D2 |
| Resyn_Go_S4 | BnaC09g04690.1D2 | BnaA09g06070.1D2 |
| Resyn_Go_S4 | BnaC09g04730.1D2 | BnaA09g06100.1D2 |
| Resyn_Go_S4 | BnaC09g04870.1D2 | BnaA09g06260.1D2 |
| Resyn_Go_S4 | BnaC09g04890.1D2 | BnaA09g06280.1D2 |
| Resyn_Go_S4 | BnaC09g04900.1D2 | BnaA09g06290.1D2 |

|             |                  |                  |
|-------------|------------------|------------------|
| Resyn_Go_S4 | BnaC09g04950.1D2 | BnaA09g06330.1D2 |
| Resyn_Go_S4 | BnaC09g05080.1D2 | BnaA09g06450.1D2 |
| Resyn_Go_S4 | BnaC09g05160.1D2 | BnaA09g06530.1D2 |
| Resyn_Go_S4 | BnaC09g05170.1D2 | BnaA09g06540.1D2 |
| Resyn_Go_S4 | BnaC09g05200.1D2 | BnaA09g06560.1D2 |
| Resyn_Go_S4 | BnaC09g05210.1D2 | BnaA09g06570.1D2 |
| Resyn_Go_S4 | BnaC09g05250.1D2 | BnaA09g06620.1D2 |
| Resyn_Go_S4 | BnaC09g05280.1D2 | BnaA09g06640.1D2 |
| Resyn_Go_S4 | BnaC09g05290.1D2 | BnaA09g06650.1D2 |
| Resyn_Go_S4 | BnaC09g05730.1D2 | BnaA09g04700.1D2 |
| Resyn_Go_S4 | BnaC09g06970.1D2 | BnaA09g07830.1D2 |
| Resyn_Go_S4 | BnaC09g07350.1D2 | BnaA09g08170.1D2 |
| Resyn_Go_S4 | BnaC09g07360.1D2 | BnaA09g08180.1D2 |
| Resyn_Go_S4 | BnaC09g07430.1D2 | BnaA09g08250.1D2 |
| Resyn_Go_S4 | BnaC09g07470.1D2 | BnaA09g08790.1D2 |
| Resyn_Go_S4 | BnaC09g07520.1D2 | BnaA09g08780.1D2 |
| Resyn_Go_S4 | BnaC09g07590.1D2 | BnaA09g08840.1D2 |
| Resyn_Go_S4 | BnaC09g07640.1D2 | BnaA09g08310.1D2 |
| Resyn_Go_S4 | BnaC09g07710.1D2 | BnaA09g08360.1D2 |
| Resyn_Go_S4 | BnaC09g07730.1D2 | BnaA09g08380.1D2 |
| Resyn_Go_S4 | BnaC09g07770.1D2 | BnaA09g08410.1D2 |
| Resyn_Go_S4 | BnaC09g07820.1D2 | BnaA09g08450.1D2 |
| Resyn_Go_S4 | BnaC09g07850.1D2 | BnaA09g08460.1D2 |
| Resyn_Go_S4 | BnaC09g07890.1D2 | BnaA09g08490.1D2 |
| Resyn_Go_S4 | BnaC09g07920.1D2 | BnaA09g08510.1D2 |
| RS_7_6      | BnaC09g00060.1D2 | BnaA09g01630.1D2 |
| RS_7_6      | BnaC09g00180.1D2 | BnaA09g01740.1D2 |
| RS_7_6      | BnaC09g00200.1D2 | BnaA09g01760.1D2 |
| RS_7_6      | BnaC09g00220.1D2 | BnaA09g01780.1D2 |
| RS_7_6      | BnaC09g00440.1D2 | BnaA09g01920.1D2 |
| RS_7_6      | BnaC09g00520.1D2 | BnaA09g02000.1D2 |
| RS_7_6      | BnaC09g00600.1D2 | BnaA09g02090.1D2 |
| RS_7_6      | BnaC09g00640.1D2 | BnaA09g02130.1D2 |
| RS_7_6      | BnaC09g00900.1D2 | BnaA09g02050.1D2 |
| RS_7_6      | BnaC09g00990.1D2 | BnaA09g02430.1D2 |
| RS_7_6      | BnaC09g01190.1D2 | BnaA09g00950.1D2 |
| RS_7_6      | BnaC09g01190.1D2 | BnaA09g00960.1D2 |
| RS_7_6      | BnaC09g01490.1D2 | BnaA09g02780.1D2 |
| RS_7_6      | BnaC09g01740.1D2 | BnaA09g03000.1D2 |
| RS_7_6      | BnaC09g01830.1D2 | BnaA09g03120.1D2 |
| RS_7_6      | BnaC09g01910.1D2 | BnaA09g03210.1D2 |
| RS_7_6      | BnaC09g01960.1D2 | BnaA09g03260.1D2 |
| RS_7_6      | BnaC09g02060.1D2 | BnaA09g03450.1D2 |
| RS_7_6      | BnaC09g02070.1D2 | BnaA09g03460.1D2 |
| RS_7_6      | BnaC09g02180.1D2 | BnaA09g03610.1D2 |
| RS_7_6      | BnaC09g02240.1D2 | BnaA09g03670.1D2 |
| RS_7_6      | BnaC09g02260.1D2 | BnaA09g03690.1D2 |
| RS_7_6      | BnaC09g02270.1D2 | BnaA09g03700.1D2 |
| RS_7_6      | BnaC09g02310.1D2 | BnaA09g03750.1D2 |
| RS_7_6      | BnaC09g02360.1D2 | BnaA09g03770.1D2 |
| RS_7_6      | BnaC09g02630.1D2 | BnaA09g00840.1D2 |

|        |                  |                  |
|--------|------------------|------------------|
| RS_7_6 | BnaC09g02670.1D2 | BnaA09g04300.1D2 |
| RS_7_6 | BnaC09g02690.1D2 | BnaA09g04330.1D2 |
| RS_7_6 | BnaC09g02950.1D2 | BnaA09g04570.1D2 |
| RS_7_6 | BnaC09g03040.1D2 | BnaA09g03300.1D2 |
| RS_7_6 | BnaC09g03130.1D2 | BnaA09g03310.1D2 |
| RS_7_6 | BnaC09g03170.1D2 | BnaA09g03350.1D2 |
| RS_7_6 | BnaC09g03180.1D2 | BnaA09g01410.1D2 |
| RS_7_6 | BnaC09g03220.1D2 | BnaA09g01370.1D2 |
| RS_7_6 | BnaC09g03340.1D2 | BnaA09g04750.1D2 |
| RS_7_6 | BnaC09g03380.1D2 | BnaA09g04770.1D2 |
| RS_7_6 | BnaC09g03500.1D2 | BnaA09g04890.1D2 |
| RS_7_6 | BnaC09g03540.1D2 | BnaA09g04920.1D2 |
| RS_7_6 | BnaC09g03690.1D2 | BnaA09g05100.1D2 |
| RS_7_6 | BnaC09g03710.1D2 | BnaA09g05120.1D2 |
| RS_7_6 | BnaC09g03750.1D2 | BnaA09g05140.1D2 |
| RS_7_6 | BnaC09g03960.1D2 | BnaA09g05380.1D2 |
| RS_7_6 | BnaC09g03980.1D2 | BnaA09g05410.1D2 |
| RS_7_6 | BnaC09g04080.1D2 | BnaA09g05460.1D2 |
| RS_7_6 | BnaC09g04190.1D2 | BnaA09g05560.1D2 |
| RS_7_6 | BnaC09g04270.1D2 | BnaA09g05630.1D2 |
| RS_7_6 | BnaC09g04640.1D2 | BnaA09g06020.1D2 |
| RS_7_6 | BnaC09g04730.1D2 | BnaA09g06100.1D2 |
| RS_7_6 | BnaC09g04890.1D2 | BnaA09g06280.1D2 |
| RS_7_6 | BnaC09g05030.1D2 | BnaA09g06350.1D2 |
| RS_7_6 | BnaC09g05200.1D2 | BnaA09g06560.1D2 |
| RS_7_6 | BnaC09g05210.1D2 | BnaA09g06570.1D2 |
| RS_7_6 | BnaC09g05230.1D2 | BnaA09g06590.1D2 |
| RS_7_6 | BnaC09g05260.1D2 | BnaA09g06630.1D2 |
| RS_7_6 | BnaC09g05280.1D2 | BnaA09g06640.1D2 |
| RS_7_6 | BnaC09g05360.1D2 | BnaA09g06700.1D2 |
| RS_7_6 | BnaC09g05390.1D2 | BnaA09g06720.1D2 |
| RS_7_6 | BnaC09g05470.1D2 | BnaA09g06850.1D2 |
| RS_7_6 | BnaC09g05600.1D2 | BnaA09g06750.1D2 |
| RS_7_6 | BnaC09g05930.1D2 | BnaA09g07050.1D2 |
| RS_7_6 | BnaC09g06250.1D2 | BnaA09g07250.1D2 |
| RS_7_6 | BnaC09g06280.1D2 | BnaA09g07270.1D2 |
| RS_7_6 | BnaC09g06440.1D2 | BnaA09g07430.1D2 |
| RS_7_6 | BnaC09g06720.1D2 | BnaA09g07650.1D2 |
| RS_7_6 | BnaC09g06760.1D2 | BnaA09g07690.1D2 |
| RS_7_6 | BnaC09g06780.1D2 | BnaA09g07700.1D2 |
| RS_7_6 | BnaC09g06790.1D2 | BnaA09g07710.1D2 |
| RS_7_6 | BnaC09g06830.1D2 | BnaA09g07760.1D2 |
| RS_7_6 | BnaC09g06890.1D2 | BnaA09g08900.1D2 |
| RS_7_6 | BnaC09g06910.1D2 | BnaA09g08890.1D2 |
| RS_7_6 | BnaC09g06930.1D2 | BnaA09g08870.1D2 |
| RS_7_6 | BnaC09g07310.1D2 | BnaA09g08120.1D2 |
| RS_7_6 | BnaC09g07330.1D2 | BnaA09g08140.1D2 |
| RS_7_6 | BnaC09g07340.1D2 | BnaA09g08150.1D2 |
| RS_7_6 | BnaC09g07350.1D2 | BnaA09g08170.1D2 |
| RS_7_6 | BnaC09g07360.1D2 | BnaA09g08180.1D2 |
| RS_7_6 | BnaC09g07470.1D2 | BnaA09g08790.1D2 |

|                   |                  |                  |
|-------------------|------------------|------------------|
| RS_7_6            | BnaC09g07590.1D2 | BnaA09g08840.1D2 |
| RS_7_6            | BnaC09g07620.1D2 | BnaA09g08290.1D2 |
| RS_7_6            | BnaC09g07910.1D2 | BnaA09g08500.1D2 |
| RS_7_6            | BnaC09g08040.1D2 | BnaA09g08650.1D2 |
| RS_7_6            | BnaC09g08060.1D2 | BnaA09g08670.1D2 |
| RS_7_6            | BnaC09g08510.1D2 | BnaA09g07790.1D2 |
| English_Giant_194 | BnaC09g00040.1D2 | BnaA09g01590.1D2 |
| English_Giant_194 | BnaC09g00060.1D2 | BnaA09g01630.1D2 |
| English_Giant_194 | BnaC09g00080.1D2 | BnaA09g01650.1D2 |
| English_Giant_194 | BnaC09g01090.1D2 | BnaA09g01510.1D2 |
| English_Giant_194 | BnaC09g01130.1D2 | BnaA09g01460.1D2 |
| English_Giant_194 | BnaC09g01140.1D2 | BnaA09g01440.1D2 |
| English_Giant_194 | BnaC09g01160.1D2 | BnaA09g00920.1D2 |
| English_Giant_194 | BnaC09g01170.1D2 | BnaA09g00930.1D2 |
| English_Giant_194 | BnaC09g01180.1D2 | BnaA09g00940.1D2 |
| English_Giant_194 | BnaC09g01190.1D2 | BnaA09g00950.1D2 |
| English_Giant_194 | BnaC09g01190.1D2 | BnaA09g00960.1D2 |
| English_Giant_194 | BnaC09g01210.1D2 | BnaA09g00960.1D2 |
| English_Giant_194 | BnaC09g01360.1D2 | BnaA09g02550.1D2 |
| English_Giant_194 | BnaC09g01470.1D2 | BnaA09g02740.1D2 |
| English_Giant_194 | BnaC09g01480.1D2 | BnaA09g02770.1D2 |
| English_Giant_194 | BnaC09g01490.1D2 | BnaA09g02780.1D2 |
| English_Giant_194 | BnaC09g01500.1D2 | BnaA09g02790.1D2 |
| English_Giant_194 | BnaC09g01530.1D2 | BnaA09g02820.1D2 |
| English_Giant_194 | BnaC09g01540.1D2 | BnaA09g02840.1D2 |
| English_Giant_194 | BnaC09g01610.1D2 | BnaA09g02910.1D2 |
| English_Giant_194 | BnaC09g01660.1D2 | BnaA09g02930.1D2 |
| English_Giant_194 | BnaC09g01720.1D2 | BnaA09g02980.1D2 |
| English_Giant_194 | BnaC09g01740.1D2 | BnaA09g03000.1D2 |
| English_Giant_194 | BnaC09g01750.1D2 | BnaA09g03010.1D2 |
| English_Giant_194 | BnaC09g01770.1D2 | BnaA09g03020.1D2 |
| English_Giant_194 | BnaC09g01780.1D2 | BnaA09g03030.1D2 |
| English_Giant_194 | BnaC09g01790.1D2 | BnaA09g03090.1D2 |
| English_Giant_194 | BnaC09g01830.1D2 | BnaA09g03120.1D2 |
| English_Giant_194 | BnaC09g01850.1D2 | BnaA09g03150.1D2 |
| English_Giant_194 | BnaC09g01860.1D2 | BnaA09g03160.1D2 |
| English_Giant_194 | BnaC09g01880.1D2 | BnaA09g03180.1D2 |
| English_Giant_194 | BnaC09g01910.1D2 | BnaA09g03210.1D2 |
| English_Giant_194 | BnaC09g01930.1D2 | BnaA09g03230.1D2 |
| English_Giant_194 | BnaC09g02030.1D2 | BnaA09g03420.1D2 |
| English_Giant_194 | BnaC09g02070.1D2 | BnaA09g03460.1D2 |
| English_Giant_194 | BnaC09g02110.1D2 | BnaA09g03550.1D2 |
| English_Giant_194 | BnaC09g02270.1D2 | BnaA09g03700.1D2 |
| English_Giant_194 | BnaC09g02290.1D2 | BnaA09g03730.1D2 |
| English_Giant_194 | BnaC09g02310.1D2 | BnaA09g03750.1D2 |
| English_Giant_194 | BnaC09g02360.1D2 | BnaA09g03770.1D2 |
| English_Giant_194 | BnaC09g02440.1D2 | BnaA09g03890.1D2 |
| English_Giant_194 | BnaC09g02600.1D2 | BnaA09g00870.1D2 |
| English_Giant_194 | BnaC09g02610.1D2 | BnaA09g00860.1D2 |
| English_Giant_194 | BnaC09g02760.1D2 | BnaA09g04380.1D2 |
| English_Giant_194 | BnaC09g02860.1D2 | BnaA09g04470.1D2 |

|                   |                  |                  |
|-------------------|------------------|------------------|
| English_Giant_194 | BnaC09g02890.1D2 | BnaA09g04520.1D2 |
| English_Giant_194 | BnaC09g02920.1D2 | BnaA09g04540.1D2 |
| English_Giant_194 | BnaC09g02950.1D2 | BnaA09g04570.1D2 |
| English_Giant_194 | BnaC09g03000.1D2 | BnaA09g04640.1D2 |
| English_Giant_194 | BnaC09g03040.1D2 | BnaA09g03300.1D2 |
| English_Giant_194 | BnaC09g03090.1D2 | BnaA09g03380.1D2 |
| English_Giant_194 | BnaC09g03170.1D2 | BnaA09g03350.1D2 |
| English_Giant_194 | BnaC09g03180.1D2 | BnaA09g01410.1D2 |
| English_Giant_194 | BnaC09g03250.1D2 | BnaA09g01340.1D2 |
| English_Giant_194 | BnaC09g03270.1D2 | BnaA09g01320.1D2 |
| English_Giant_194 | BnaC09g03280.1D2 | BnaA09g01310.1D2 |
| English_Giant_194 | BnaC09g03340.1D2 | BnaA09g04750.1D2 |
| English_Giant_194 | BnaC09g03360.1D2 | BnaA09g04760.1D2 |
| English_Giant_194 | BnaC09g03380.1D2 | BnaA09g04770.1D2 |
| English_Giant_194 | BnaC09g03390.1D2 | BnaA09g04770.1D2 |
| English_Giant_194 | BnaC09g03410.1D2 | BnaA09g04790.1D2 |
| English_Giant_194 | BnaC09g03460.1D2 | BnaA09g04840.1D2 |
| English_Giant_194 | BnaC09g03480.1D2 | BnaA09g04870.1D2 |
| English_Giant_194 | BnaC09g03490.1D2 | BnaA09g04880.1D2 |
| English_Giant_194 | BnaC09g03500.1D2 | BnaA09g04890.1D2 |
| English_Giant_194 | BnaC09g03520.1D2 | BnaA09g04910.1D2 |
| English_Giant_194 | BnaC09g03540.1D2 | BnaA09g04920.1D2 |
| English_Giant_194 | BnaC09g03690.1D2 | BnaA09g05100.1D2 |
| English_Giant_194 | BnaC09g03710.1D2 | BnaA09g05120.1D2 |
| English_Giant_194 | BnaC09g03730.1D2 | BnaA09g05130.1D2 |
| English_Giant_194 | BnaC09g03750.1D2 | BnaA09g05140.1D2 |
| English_Giant_194 | BnaC09g03960.1D2 | BnaA09g05380.1D2 |
| English_Giant_194 | BnaC09g04030.1D2 | BnaA09g05450.1D2 |
| English_Giant_194 | BnaC09g04260.1D2 | BnaA09g05610.1D2 |
| English_Giant_194 | BnaC09g04270.1D2 | BnaA09g05630.1D2 |
| English_Giant_194 | BnaC09g04590.1D2 | BnaA09g05950.1D2 |
| English_Giant_194 | BnaC09g04600.1D2 | BnaA09g05960.1D2 |
| English_Giant_194 | BnaC09g04650.1D2 | BnaA09g06030.1D2 |
| English_Giant_194 | BnaC09g04660.1D2 | BnaA09g06040.1D2 |
| English_Giant_194 | BnaC09g04720.1D2 | BnaA09g06090.1D2 |
| English_Giant_194 | BnaC09g04740.1D2 | BnaA09g06110.1D2 |
| English_Giant_194 | BnaC09g04890.1D2 | BnaA09g06280.1D2 |
| English_Giant_194 | BnaC09g04900.1D2 | BnaA09g06290.1D2 |
| English_Giant_194 | BnaC09g04920.1D2 | BnaA09g06300.1D2 |
| English_Giant_194 | BnaC09g04950.1D2 | BnaA09g06330.1D2 |
| English_Giant_194 | BnaC09g05080.1D2 | BnaA09g06450.1D2 |
| English_Giant_194 | BnaC09g05170.1D2 | BnaA09g06540.1D2 |
| English_Giant_194 | BnaC09g05200.1D2 | BnaA09g06560.1D2 |
| English_Giant_194 | BnaC09g05230.1D2 | BnaA09g06590.1D2 |
| English_Giant_194 | BnaC09g05250.1D2 | BnaA09g06620.1D2 |
| English_Giant_194 | BnaC09g05290.1D2 | BnaA09g06650.1D2 |
| English_Giant_194 | BnaC09g05360.1D2 | BnaA09g06700.1D2 |
| English_Giant_194 | BnaC09g05600.1D2 | BnaA09g06750.1D2 |
| English_Giant_194 | BnaC09g05630.1D2 | BnaA09g06170.1D2 |
| English_Giant_194 | BnaC09g05700.1D2 | BnaA09g06010.1D2 |
| English_Giant_194 | BnaC09g05720.1D2 | BnaA09g04690.1D2 |



English\_Giant\_194 BnaC09g09810.1D2 BnaA09g28480.1D2

**List of HE genes (C09 to A10)**

| <b>Accession</b> | <b>Lost gene</b> | <b>Duplicated HE gene</b> |
|------------------|------------------|---------------------------|
| H149             | BnaC09g43430.1D2 | BnaA10g23620.1D2          |
| H149             | BnaC09g43490.1D2 | BnaA10g23680.1D2          |
| H149             | BnaC09g43560.1D2 | BnaA10g23750.1D2          |
| H149             | BnaC09g43620.1D2 | BnaA10g23830.1D2          |
| H149             | BnaC09g43790.1D2 | BnaA10g26570.1D2          |
| H149             | BnaC09g43830.1D2 | BnaA10g26540.1D2          |
| H149             | BnaC09g43840.1D2 | BnaA10g26530.1D2          |
| H149             | BnaC09g43990.1D2 | BnaA10g23920.1D2          |
| H149             | BnaC09g44010.1D2 | BnaA10g23930.1D2          |
| H149             | BnaC09g44040.1D2 | BnaA10g23960.1D2          |
| H149             | BnaC09g44070.1D2 | BnaA10g24000.1D2          |
| H149             | BnaC09g44080.1D2 | BnaA10g24010.1D2          |
| H149             | BnaC09g44140.1D2 | BnaA10g24070.1D2          |
| H149             | BnaC09g44200.1D2 | BnaA10g24130.1D2          |
| H149             | BnaC09g44210.1D2 | BnaA10g24130.1D2          |
| H149             | BnaC09g44240.1D2 | BnaA10g24170.1D2          |
| H149             | BnaC09g44280.1D2 | BnaA10g24210.1D2          |
| H149             | BnaC09g44340.1D2 | BnaA10g24270.1D2          |
| H149             | BnaC09g44440.1D2 | BnaA10g24360.1D2          |
| H149             | BnaC09g44450.1D2 | BnaA10g24370.1D2          |
| H149             | BnaC09g44530.1D2 | BnaA10g24450.1D2          |
| H149             | BnaC09g44560.1D2 | BnaA10g24480.1D2          |
| H149             | BnaC09g44610.1D2 | BnaA10g24540.1D2          |
| H149             | BnaC09g44700.1D2 | BnaA10g24640.1D2          |
| H149             | BnaC09g44770.1D2 | BnaA10g24730.1D2          |
| H149             | BnaC09g44810.1D2 | BnaA10g24760.1D2          |
| H149             | BnaC09g45190.1D2 | BnaA10g27510.1D2          |
| H149             | BnaC09g45200.1D2 | BnaA10g27500.1D2          |
| H149             | BnaC09g45240.1D2 | BnaA10g27460.1D2          |
| H149             | BnaC09g45350.1D2 | BnaA10g25290.1D2          |
| H149             | BnaC09g45380.1D2 | BnaA10g25270.1D2          |
| H149             | BnaC09g45450.1D2 | BnaA10g25310.1D2          |
| H149             | BnaC09g45490.1D2 | BnaA10g25350.1D2          |
| H149             | BnaC09g45550.1D2 | BnaA10g25410.1D2          |
| H149             | BnaC09g45750.1D2 | BnaA10g25220.1D2          |
| H149             | BnaC09g45760.1D2 | BnaA10g25210.1D2          |
| H149             | BnaC09g45940.1D2 | BnaA10g25020.1D2          |
| H149             | BnaC09g45980.1D2 | BnaA10g24980.1D2          |
| H149             | BnaC09g46070.1D2 | BnaA10g24900.1D2          |
